# Supplementary material for: Study on the Characteristics of Coarse Feeding Tolerance of Ding’an Pigs: Phenotypic and Candidate Genes Identification
Source: MDPI journal article supplement (doi:10.3390/genes15050599), 2024-05-08
Supplement: s1 [file s1]

**Supplementary Table S1.** Maize-soybean meal ration composition and nutritional levels<sup>1</sup>.

| Ingredients           | Crude fiber5% | Crude fiber10% |
|-----------------------|---------------|----------------|
| Maize                 | 49.40         | 32.70          |
| Alfalfa grass meal    | 2.70          | 16.90          |
| Bran                  | 13.10         | 13.10          |
| Soybean meal          | 18.00         | 18.00          |
| Rice bran             | 13.00         | 13.00          |
| Soybean oil           | 1.00          | 3.50           |
| Stone meal            | 1.40          | 1.40           |
| Salt                  | 0.30          | 0.30           |
| Lysine                | 0.10          | 0.10           |
| Premix                | 1.00          | 1.00           |
| Total                 | 100.00        | 100.00         |
| Nutrient level        |               |                |
| Digestive energy (DE) | 13.00         | 12.89          |
| Crude protein (CP)    | 16.01         | 16.30          |
| Lysine                | 0.85          | 0.84           |
| Methionine + cystine  | 0.44          | 0.43           |
| Tryptophan            | 0.14          | 0.14           |
| Threonine             | 0.54          | 0.53           |
| Crude fiber           | 5.00          | 10.00          |
| Calcium               | 0.64          | 0.65           |
| Total phosphorus      | 0.55          | 0.54           |

<sup>1</sup> Digestive energy was calculated, and the rest was measured. The Maize-soybean meal ration were quoted from Pengxiang Xue's article
