# Supplementary material for: Study on the Characteristics of Coarse Feeding Tolerance of Ding’an Pigs: Phenotypic and Candidate Genes Identification
Source: Genes (Basel). 2024 May 8;15(5):599. doi: 10.3390/genes15050599 (PMC11121715; doi:10.3390/genes15050599)
Supplement: Supplementary file 1 [file genes-15-00599-s001.zip]

Archive with 11 entries (11 files):
- Supplementary FigureS1..tif
- Supplementary FigureS2..tif
- Supplementary FigureS3..tif
- Supplementary FigureS4..tif
- Supplementary FigureS5..tif
- Supplementary Table S1. Maize-soybean meal ration composition and nutritional levels1..pdf
- Supplementary Table S2..xlsx
- Supplementary Table S3. Differential Gene Expression.xlsx
- Supplementary Table S4. 65Differential Gene Expression.xlsx
- Supplementary Table S5..xlsx
- Supplementary Table S6..xls
