# Supplementary material for: Study on the Characteristics of Coarse Feeding Tolerance of Ding’an Pigs: Phenotypic and Candidate Genes Identification
Source: Genes (Basel). 2024 May 8;15(5):599. doi: 10.3390/genes15050599 (PMC11121715; doi:10.3390/genes15050599)
Supplement: Supplementary file 1 [file genes-15-00599-s001.zip › Supplementary Table S2..xlsx]

## Sheet: Supplementary Table S2
Supplementary Table S2： Primers for real-time fluorescent quantitative PCR
Gene name		Primer sequence (5'-3')	Product length (bp)	Annealing temperature (℃)
IFN-DELTA-1-F	TCTGCTGTCCATTGCGTAG		161	60
IFN-DELTA-1-R	CAGTAACAGGTGCCTTCAGTC
SLC27A2-F	TCCCGAAAGCTGCAATG		106	60
SLC27A2-R	AAGGGTAGGGTGGTATAGAGG
SMCO3-F	GGCGGCAAGAAGTAAACC		115	60
SMCO3-R	GCCAGCCTGCACCCTAA
CLDN8-F	GCTTGGTGGTGTTGGAATG		180	60
CLDN8-R	GCCAGCAGGGAATCGTAG
IL12B-F	GTGTTCAAGTTCAGGGCAAGA		136	60
IL12B-R	CAGGAGGAGCTGTAGTAGCG
ESM1-F	ACCAAGTACGCGGTGGAT		142	60
ESM1-R	CTGTGCGGTAACAAGTTTCTC
AP4B1-F	AAGAGTCGCAGTGCTTGGT		176	60
AP4B1-R	TGATGACAACACCTCCTTCC
TKTL2-F	ACAAGAATCCGATACCCAACC		183	60
TKTL2-R	CACCATCCAGGACAACAACTC
GAPDH-F	GTCGGTTGTGGATCTGACCT		118	60
GAPDH-R	GTCCTCAGTGTAGCCCAGGA
