# Supplementary material for: Study on the Characteristics of Coarse Feeding Tolerance of Ding’an Pigs: Phenotypic and Candidate Genes Identification
Source: Genes (Basel). 2024 May 8;15(5):599. doi: 10.3390/genes15050599 (PMC11121715; doi:10.3390/genes15050599)
Supplement: Supplementary file 1 [file genes-15-00599-s001.zip › Supplementary Table S3. Differential Gene Expression.xlsx]

## Sheet: DAHvsDAN
Supplement Table S3: Differential Gene Expression data for DAH vs. DAN
ensembl_gene_id	baseMean	log2FoldChange	lfcSE	stat	pvalue	FDR	change	external_gene_name	description	entrezgene_id
ENSSSCG00000048905	7.98228	5.06463	1.36922	3.69893	0.000216514	0.0487107	UP			NA
ENSSSCG00000029061	18.6481	2.99603	0.576339	5.19838	2.01032e-07	0.000635584	UP	BMP3	bone morphotic protein 3 [Source:VGNC Symbol;Acc:VGNC:85842]	100512974
ENSSSCG00000017556	17.5522	2.1948	0.542733	4.04397	5.25543e-05	0.0219034	UP	ANKRD40CL	ANKRD40 C-terminal like [Source:VGNC Symbol;Acc:VGNC:108038]	100626580
ENSSSCG00000007549	53.3203	2.07001	0.559282	3.70119	0.000214594	0.0487107	UP	CYP2W1	cytochrome P450 family 2 subfamily W member 1 [Source:VGNC Symbol;Acc:VGNC:103553]	100522669
ENSSSCG00000004923	355.884	1.63745	0.326865	5.00957	5.45511e-07	0.00143724	UP	SLC51B	solute carrier family 51 subunit beta [Source:VGNC Symbol;Acc:VGNC:93139]	100525144
ENSSSCG00000047929	36.6875	1.55807	0.386475	4.03149	5.54236e-05	0.0219034	UP			102162420
ENSSSCG00000025414	99.7944	1.54995	0.284048	5.45664	4.85231e-08	0.000191763	UP		peptide YY [Source:VGNC Symbol;Acc:VGNC:99029]	100512433
ENSSSCG00000016915	33.8614	1.38415	0.332352	4.16472	3.11729e-05	0.0171526	UP	IL31RA	interleukin 31 receptor A [Source:VGNC Symbol;Acc:VGNC:89105]	100522044
ENSSSCG00000009380	303.446	1.35182	0.229109	5.90033	3.62776e-09	2.86738e-05	UP	NEK5	NIMA related kinase 5 [Source:VGNC Symbol;Acc:VGNC:90677]	100156672
ENSSSCG00000034515	62.7685	1.2962	0.338701	3.82698	0.000129725	0.0347575	UP			100517427
ENSSSCG00000040934	1525.49	1.05465	0.187896	5.61293	1.98925e-08	0.00010482	UP	ISX	intestine specific homeobox [Source:VGNC Symbol;Acc:VGNC:96164]	100626910
ENSSSCG00000035152	223.051	1.04551	0.273832	3.81807	0.0001345	0.0352584	UP	TEF	TEF transcription factor, PAR bZIP family member [Source:VGNC Symbol;Acc:VGNC:93864]	110260633
ENSSSCG00000040770	41116.3	1.02664	0.226632	4.52998	5.89901e-06	0.0071732	UP	CA1	carbonic anhydrase 1 [Source:VGNC Symbol;Acc:VGNC:98744]	100153915
ENSSSCG00000015895	667.928	1.00876	0.20803	4.84912	1.2401e-06	0.00245044	UP	GCG	glucagon [Source:VGNC Symbol;Acc:VGNC:96317]	397595
ENSSSCG00000032557	451.729	0.94171	0.226232	4.16258	3.14668e-05	0.0171526	UP	LDHB	lactate dehydrogenase B [Source:NCBI gene (formerly Entrezgene);Acc:100621540]	100621540
ENSSSCG00000034440	221.347	0.939977	0.195899	4.79828	1.60038e-06	0.00262354	UP	MMP28	matrix metallopeptidase 28 [Source:VGNC Symbol;Acc:VGNC:90278]	110256050
ENSSSCG00000025885	3147.74	0.932386	0.228684	4.07718	4.55857e-05	0.0219034	UP	ITLN2	intelectin 2 [Source:NCBI gene (formerly Entrezgene);Acc:100144619]	110260309
ENSSSCG00000004565	3985.08	0.907496	0.186965	4.85382	1.21108e-06	0.00245044	UP	CA12	carbonic anhydrase 12 [Source:VGNC Symbol;Acc:VGNC:86097]	100152749
ENSSSCG00000033815	168.919	0.878771	0.228704	3.84239	0.000121842	0.0332083	UP	SST	somatostatin [Source:VGNC Symbol;Acc:VGNC:93495]	494469
ENSSSCG00000015276	284.378	0.843675	0.228249	3.69628	0.000218779	0.0487107	UP	ETNK2	ethanolamine kinase 2 [Source:VGNC Symbol;Acc:VGNC:87807]	100622861
ENSSSCG00000030150	10625.6	0.796008	0.173945	4.5762	4.735e-06	0.00623758	UP	UGDH	UDP-glucose 6-dehydrogenase [Source:VGNC Symbol;Acc:VGNC:94686]	100627727
ENSSSCG00000004615	139.466	0.753436	0.187731	4.01339	5.98536e-05	0.022634	UP	WDR72	WD repeat domain 72 [Source:VGNC Symbol;Acc:VGNC:94938]	100153251
ENSSSCG00000038071	99.9086	0.744368	0.190577	3.90586	9.38927e-05	0.0296851	UP	RASL12	RAS like family 12 [Source:VGNC Symbol;Acc:VGNC:92121]	100155433
ENSSSCG00000033539	394.541	0.725347	0.196825	3.68525	0.000228481	0.0488085	UP	CRYBG2	crystallin beta-gamma domain containing 2 [Source:VGNC Symbol;Acc:VGNC:87019]	110261120
ENSSSCG00000023630	125.899	0.713172	0.192737	3.70022	0.000215409	0.0487107	UP	CPM	carboxypeptidase M [Source:VGNC Symbol;Acc:VGNC:86947]	100628221
ENSSSCG00000008943	4707.73	0.705587	0.169903	4.15289	3.283e-05	0.0172992	UP	SLC4A4	solute carrier family 4 member 4 [Source:VGNC Symbol;Acc:VGNC:93133]	503546
ENSSSCG00000006780	261.588	0.6921	0.178801	3.87079	0.000108483	0.0317944	UP	WNT2B	Wnt family member 2B [Source:VGNC Symbol;Acc:VGNC:94969]	100520560
ENSSSCG00000005282	1073.19	0.630361	0.151174	4.16978	3.04899e-05	0.0171526	UP	VPS13A	vacuolar protein sorting 13 homolog A [Source:VGNC Symbol;Acc:VGNC:94838]	100153747
ENSSSCG00000043909	256.19	-0.59697	0.156635	-3.81121	0.000138286	0.0352584	DOWN			NA
ENSSSCG00000049117	787.57	-0.604456	0.139735	-4.32573	1.52028e-05	0.0114441	DOWN			NA
ENSSSCG00000037645	949.222	-0.615202	0.139554	-4.40834	1.04164e-05	0.00866642	DOWN			100621773
ENSSSCG00000005511	269.977	-0.627646	0.159405	-3.93744	8.23564e-05	0.0276998	DOWN	TRAF1	TNF receptor associated factor 1 [Source:VGNC Symbol;Acc:VGNC:94358]	100627029
ENSSSCG00000000951	221.873	-0.635844	0.163825	-3.88124	0.000103925	0.0317944	DOWN	CSRP2	cysteine and glycine rich protein 2 [Source:VGNC Symbol;Acc:VGNC:103226]	100153630
ENSSSCG00000013111	327.564	-0.663948	0.163692	-4.05609	4.9901e-05	0.0219034	DOWN	CD6	CD6 molecule [Source:VGNC Symbol;Acc:VGNC:86423]	100513519
ENSSSCG00000003088	4508.2	-0.664919	0.149651	-4.44313	8.86612e-06	0.00824445	DOWN	APOE	apolipoprotein E [Source:VGNC Symbol;Acc:VGNC:103899]	397576
ENSSSCG00000002962	419.942	-0.684663	0.165436	-4.13853	3.49534e-05	0.017824	DOWN	MAP4K1	mitogen-activated protein kinase kinase kinase kinase 1 [Source:VGNC Symbol;Acc:VGNC:98111]	100516374
ENSSSCG00000013115	389.974	-0.689636	0.183441	-3.75944	0.000170294	0.0427302	DOWN	CD5	CD5 molecule [Source:VGNC Symbol;Acc:VGNC:86420]	100513336
ENSSSCG00000034615	135.051	-0.693238	0.17369	-3.99123	6.57302e-05	0.0241642	DOWN	TNFAIP8L1	TNF alpha induced protein 8 like 1 [Source:VGNC Symbol;Acc:VGNC:94254]	110259359
ENSSSCG00000025618	2087.86	-0.742151	0.171176	-4.33561	1.45354e-05	0.0114441	DOWN	TAP1	transporter 1, ATP binding cassette subfamily B member [Source:VGNC Symbol;Acc:VGNC:98358]	733649
ENSSSCG00000024015	208.627	-0.746526	0.189364	-3.94228	8.0712e-05	0.0276998	DOWN	FADS1	fatty acid desaturase 1 [Source:VGNC Symbol;Acc:VGNC:87875]	444995
ENSSSCG00000003608	483.208	-0.753713	0.19596	-3.84627	0.000119931	0.0332083	DOWN	LCK	LCK proto-onco, Src family tyrosine kinase [Source:VGNC Symbol;Acc:VGNC:89657]	100233188
ENSSSCG00000017494	598.248	-0.758926	0.205618	-3.69096	0.000223411	0.0488085	DOWN	IKZF3	IKAROS family zinc finger 3 [Source:VGNC Symbol;Acc:VGNC:89074]	100516292
ENSSSCG00000031361	182.353	-0.7593	0.197598	-3.84264	0.000121716	0.0332083	DOWN	CELSR1	cadherin EGF LAG seven-pass G-type receptor 1 [Source:HGNC Symbol;Acc:HGNC:1850]	102159820
ENSSSCG00000005949	228.34	-0.791953	0.199139	-3.97689	6.98219e-05	0.0250851	DOWN		Src like adaptor [Source:VGNC Symbol;Acc:VGNC:92908]	100156099
ENSSSCG00000029267	206.816	-0.925639	0.228885	-4.04412	5.25194e-05	0.0219034	DOWN	TIGIT	T cell immunoreceptor with Ig and ITIM domains [Source:VGNC Symbol;Acc:VGNC:93984]	100624099
ENSSSCG00000045414	63.0209	-0.937289	0.250404	-3.7431	0.000181764	0.0442211	DOWN			NA
ENSSSCG00000007508	512.947	-0.949692	0.198225	-4.79099	1.65963e-06	0.00262354	DOWN	ZBP1	Z-DNA binding protein 1 [Source:VGNC Symbol;Acc:VGNC:95770]	100144524
ENSSSCG00000023379	970.344	-0.963201	0.227514	-4.23359	2.2999e-05	0.0151487	DOWN	UBE2L6	ubiquitin conjugating enzyme E2 L6 [Source:VGNC Symbol;Acc:VGNC:94647]	100514753
ENSSSCG00000021036	241.899	-1.0227	0.264535	-3.86603	0.000110621	0.0317944	DOWN	RAB3B	RAB3B, member RAS onco family [Source:VGNC Symbol;Acc:VGNC:98265]	100514585
ENSSSCG00000000978	90.3797	-1.02977	0.252656	-4.07577	4.58621e-05	0.0219034	DOWN	MLC1	modulator of VRAC current 1 [Source:VGNC Symbol;Acc:VGNC:90251]	100519843
ENSSSCG00000033260	55.8622	-1.05298	0.276261	-3.81156	0.00013809	0.0352584	DOWN	TNNI2	troponin I2, fast skeletal type [Source:VGNC Symbol;Acc:VGNC:94283]	606751
ENSSSCG00000035297	2552.15	-1.1436	0.268634	-4.2571	2.07095e-05	0.0142337	DOWN	ISG12(A)	putative ISG12(a) protein [Source:NCBI gene (formerly Entrezgene);Acc:100153902]	100153902
ENSSSCG00000031106	248.582	-1.26365	0.340248	-3.71391	0.000204083	0.0481514	DOWN	PLA2G2D	phospholipase A2 group IID [Source:VGNC Symbol;Acc:VGNC:91491]	100512662
ENSSSCG00000007816	158.24	-1.28029	0.323657	-3.95572	7.63059e-05	0.0268054	DOWN	IL21R	interleukin 21 receptor [Source:VGNC Symbol;Acc:VGNC:89096]	100518723
ENSSSCG00000037358	501.165	-1.32154	0.298998	-4.41988	9.87578e-06	0.00866642	DOWN	HPS5	HPS5 biosis of lysosomal organelles complex 2 subunit 2 [Source:NCBI gene (formerly Entrezgene);Acc:100049701]	100525680
ENSSSCG00000040575	452.81	-1.34331	0.315348	-4.25976	2.04647e-05	0.0142337	DOWN	ISG15	ISG15 ubiquitin like modifier [Source:VGNC Symbol;Acc:VGNC:89223]	100145895
ENSSSCG00000042108	37.4416	-1.40571	0.363405	-3.86817	0.000109657	0.0317944	DOWN			NA
ENSSSCG00000016900	33.4483	-1.41581	0.318014	-4.45204	8.50574e-06	0.00824445	DOWN	ESM1	endothelial cell specific molecule 1 [Source:VGNC Symbol;Acc:VGNC:87789]	100739671
ENSSSCG00000004890	331.487	-1.45582	0.326473	-4.45922	8.22576e-06	0.00824445	DOWN	SERPINB2	serpin family B member 2 [Source:VGNC Symbol;Acc:VGNC:92737]	100519286
ENSSSCG00000023762	117.359	-1.5949	0.395326	-4.0344	5.47416e-05	0.0219034	DOWN	TRPM2	transient receptor potential cation channel subfamily M member 2 [Source:VGNC Symbol;Acc:VGNC:94467]	100622032
ENSSSCG00000011827	45.5454	-1.90197	0.450642	-4.22058	2.43669e-05	0.0154077	DOWN	LSG1	large 60S subunit nuclear export GTPase 1 [Source:VGNC Symbol;Acc:VGNC:89869]	100155750
ENSSSCG00000032017	27.3656	-1.91834	0.475812	-4.03172	5.53712e-05	0.0219034	DOWN			100627879
ENSSSCG00000014987	67.4601	-2.16627	0.483121	-4.48391	7.32889e-06	0.00824445	DOWN	MMP12	matrix metallopeptidase 12 [Source:VGNC Symbol;Acc:VGNC:90268]	100101475
ENSSSCG00000035171	13.2497	-2.17281	0.582043	-3.73308	0.000189153	0.0453049	DOWN			NA
ENSSSCG00000031085	25.0721	-2.29131	0.583902	-3.92413	8.70449e-05	0.0280818	DOWN			100627089
ENSSSCG00000009921	124.498	-2.6648	0.426391	-6.24965	4.11371e-10	6.50296e-06	DOWN	OASL	2'-5'-oligoadenylate synthetase like [Source:VGNC Symbol;Acc:VGNC:91008]	595119

## Sheet: DLYHvsDLYN
Supplement Table S3: Differential Gene Expression data for DLYH vs. DLYN
ensembl_gene_id	baseMean	log2FoldChange	lfcSE	stat	pvalue	FDR	change	external_gene_name	description	entrezgene_id
ENSSSCG00000015839	172.817	0.923038	0.226015	4.08397	4.4272e-05	0.0411382	UP	NRG1	neuregulin 1 [Source:VGNC Symbol;Acc:VGNC:96453]	102164569
ENSSSCG00000032473	120.987	0.813141	0.180624	4.50185	6.73658e-06	0.0125195	UP	NYNRIN	NYN domain and retroviral integrase containing [Source:VGNC Symbol;Acc:VGNC:91003]	100155701
ENSSSCG00000039568	145.605	0.772625	0.174775	4.42068	9.83899e-06	0.0142217	UP	SNAI2	snail family transcriptional repressor 2 [Source:VGNC Symbol;Acc:VGNC:98330]	102162332
ENSSSCG00000039318	119.603	0.757416	0.184839	4.09771	4.17255e-05	0.0411382	UP	HS3ST3B1	heparan sulfate-glucosamine 3-sulfotransferase 3B1 [Source:VGNC Symbol;Acc:VGNC:99003]	100737777
ENSSSCG00000022961	249.746	0.749831	0.181111	4.14017	3.47041e-05	0.0376221	UP	CLMP	CXADR like membrane protein [Source:VGNC Symbol;Acc:VGNC:86770]	100512427
ENSSSCG00000039468	1528.22	0.722736	0.14858	4.8643	1.14865e-06	0.0125195	UP	SERPINH1	serpin family H member 1 [Source:VGNC Symbol;Acc:VGNC:92746]	396773
ENSSSCG00000023371	377.969	0.680003	0.145466	4.67464	2.94477e-06	0.0125195	UP	EHD2	EH domain containing 2 [Source:VGNC Symbol;Acc:VGNC:87596]	100624668
ENSSSCG00000028623	400.592	0.642155	0.141684	4.5323	5.83453e-06	0.0125195	UP	RARRES1	retinoic acid receptor responder 1 [Source:VGNC Symbol;Acc:VGNC:92097]	100620650
ENSSSCG00000011192	156.976	-0.608298	0.145918	-4.16876	3.06266e-05	0.0362201	DOWN	HACL1	2-hydroxyacyl-CoA lyase 1 [Source:VGNC Symbol;Acc:VGNC:88770]	100518218
ENSSSCG00000035152	160.638	-0.8455	0.190101	-4.44762	8.68251e-06	0.0141188	DOWN	TEF	TEF transcription factor, PAR bZIP family member [Source:VGNC Symbol;Acc:VGNC:93864]	110260633
ENSSSCG00000027017	362.159	-0.947837	0.209764	-4.51858	6.22554e-06	0.0125195	DOWN		nuclear receptor subfamily 1 group D member 2 [Source:VGNC Symbol;Acc:VGNC:99726]	100621076

## Sheet: DAHvsDLYH
Supplement Table S3: Differential Gene Expression data for DAH vs. DLYH
ensembl_gene_id	baseMean	log2FoldChange	lfcSE	stat	pvalue	FDR	change	external_gene_name	description	entrezgene_id
ENSSSCG00000027046	205.926	24.7985	3.38356	7.32912	2.31665e-13	1.55998e-10	UP			100625207
ENSSSCG00000012179	132.628	24.1849	3.38367	7.14754	8.83468e-13	5.37222e-10	UP			100624329
ENSSSCG00000012178	443.689	11.841	3.38346	3.49967	0.000465827	0.0162683	UP			100624149
ENSSSCG00000037509	172.886	10.9406	3.3836	3.23341	0.00122323	0.0328693	UP		eukaryotic translation initiation factor 1A, Y-linked [Source:NCBI gene (formerly Entrezgene);Acc:100625415]	100625415
ENSSSCG00000033734	251.937	10.1065	3.01608	3.35088	0.000805559	0.0247974	UP			110257905
ENSSSCG00000026430	248.04	10.0415	3.07897	3.2613	0.00110903	0.0306901	UP			100624590
ENSSSCG00000029771	9.56348	6.76865	1.17736	5.74899	8.97767e-09	2.23213e-06	UP			414736
ENSSSCG00000013344	386.594	6.7014	1.94175	3.45122	0.000558058	0.0185954	UP	ANO5	anoctamin 5 [Source:VGNC Symbol;Acc:VGNC:85358]	100520542
ENSSSCG00000005152	4.73553	5.74635	1.32634	4.33249	1.47434e-05	0.00119576	UP	IFN-DELTA-1	interferon-delta-1 [Source:NCBI gene (formerly Entrezgene);Acc:396854]	396854
ENSSSCG00000044466	4.32181	5.61625	1.43161	3.92305	8.74367e-05	0.00477387	UP			NA
ENSSSCG00000035337	37.1918	5.45581	1.15016	4.74352	2.10037e-06	0.000242457	UP			110255206
ENSSSCG00000034731	3.82455	5.43996	1.61862	3.36086	0.000777015	0.0240562	UP		trefoil factor 1 [Source:VGNC Symbol;Acc:VGNC:93919]	780401
ENSSSCG00000020695	6.06562	5.36127	1.25977	4.25575	2.08351e-05	0.00158083	UP			NA
ENSSSCG00000004643	23.3801	5.26646	0.818433	6.43481	1.23628e-10	4.87304e-08	UP	SLC27A2	solute carrier family 27 member 2 [Source:VGNC Symbol;Acc:VGNC:93036]	494011
ENSSSCG00000000610	5.30909	5.1665	1.34543	3.84004	0.000123017	0.0060612	UP	SMCO3	single-pass membrane protein with coiled-coil domains 3 [Source:VGNC Symbol;Acc:VGNC:93245]	100511991
ENSSSCG00000012030	42.4744	4.97274	0.589739	8.43209	3.39535e-17	6.09692e-14	UP	CLDN8	claudin 8 [Source:VGNC Symbol;Acc:VGNC:86740]	100302021
ENSSSCG00000032557	294.512	4.81003	0.272416	17.6569	9.0012e-70	1.45468e-65	UP	LDHB	lactate dehydrogenase B [Source:NCBI gene (formerly Entrezgene);Acc:100621540]	100621540
ENSSSCG00000014272	7.58439	4.34969	1.40718	3.09106	0.00199441	0.045654	UP		acyl-CoA synthetase long chain family member 6 [Source:VGNC Symbol;Acc:VGNC:99581]	100522126
ENSSSCG00000033469	14.1295	4.25702	0.809381	5.2596	1.44369e-07	2.40531e-05	UP			NA
ENSSSCG00000011735	790.878	4.05835	0.649858	6.24498	4.23851e-10	1.39793e-07	UP	SI	sucrase-isomaltase [Source:VGNC Symbol;Acc:VGNC:92863]	100623884
ENSSSCG00000016627	4.15637	4.05304	1.2808	3.16446	0.00155373	0.0383944	UP	ASZ1	ankyrin repeat, SAM and basic leucine zipper domain containing 1 [Source:VGNC Symbol;Acc:VGNC:85597]	100516477
ENSSSCG00000029879	25.8149	3.95137	0.718232	5.50152	3.76536e-08	8.00683e-06	UP	LTF	lactotransferrin [Source:VGNC Symbol;Acc:VGNC:89891]	397649
ENSSSCG00000003833	3.96686	3.95012	1.28468	3.07479	0.00210652	0.0474805	UP	DAB1	DAB adaptor protein 1 [Source:VGNC Symbol;Acc:VGNC:87143]	100037307
ENSSSCG00000033806	5.12154	3.72838	1.12716	3.30777	0.000940432	0.0273844	UP			100625698
ENSSSCG00000044044	4.94835	3.69859	1.06873	3.46075	0.000538671	0.0181364	UP			NA
ENSSSCG00000012121	26.3637	3.58023	0.48	7.45881	8.73077e-14	6.41354e-11	UP	EGFL6	EGF like domain multiple 6 [Source:VGNC Symbol;Acc:VGNC:87583]	100153585
ENSSSCG00000002479	389.26	3.56341	0.448396	7.947	1.91085e-15	2.05875e-12	UP	SERPINA11	serpin family A member 11 [Source:VGNC Symbol;Acc:VGNC:92733]	100155953
ENSSSCG00000031306	6.8898	3.42847	1.07073	3.202	0.00136475	0.0349537	UP			NA
ENSSSCG00000016215	80.2233	3.36576	0.371324	9.06423	1.25485e-19	4.05592e-16	UP			100158003
ENSSSCG00000047896	10.7371	3.36141	0.758538	4.43143	9.36113e-06	0.000854718	UP			NA
ENSSSCG00000049683	106.869	3.28635	0.995296	3.30189	0.000960372	0.0276659	UP			102165634
ENSSSCG00000016533	13.725	3.23542	0.745955	4.33728	1.44254e-05	0.00119532	UP	STRA8	stimulated by retinoic acid 8 [Source:VGNC Symbol;Acc:VGNC:93574]	100525138
ENSSSCG00000043803	56.468	3.17784	0.825387	3.85012	0.000118059	0.00592533	UP			NA
ENSSSCG00000016135	47.4452	3.1655	0.401463	7.88493	3.14718e-15	2.99186e-12	UP	CPO	carboxypeptidase O [Source:VGNC Symbol;Acc:VGNC:95957]	100155330
ENSSSCG00000010334	182.631	3.16192	0.539638	5.85934	4.64704e-09	1.2729e-06	UP	SFTPD	surfactant protein D [Source:VGNC Symbol;Acc:VGNC:92782]	397198
ENSSSCG00000017932	318.488	3.03641	0.660732	4.59552	4.31669e-06	0.000447193	UP	ASGR2	asialoglycoprotein receptor 2 [Source:VGNC Symbol;Acc:VGNC:85576]	100739379
ENSSSCG00000016517	6.1139	2.92467	0.902943	3.23904	0.00119934	0.0324123	UP	SVOPL	SVOP like [Source:VGNC Symbol;Acc:VGNC:93644]	100519751
ENSSSCG00000038233	18.2099	2.82855	0.796993	3.54903	0.000386655	0.0144313	UP		lipocalin 15 [Source:VGNC Symbol;Acc:VGNC:89661]	100514209
ENSSSCG00000037850	20.396	2.76617	0.507554	5.45001	5.03661e-08	1.03033e-05	UP			NA
ENSSSCG00000034698	11.0085	2.74884	0.692547	3.96917	7.21235e-05	0.00416693	UP			NA
ENSSSCG00000027118	79.5884	2.71927	0.738269	3.68331	0.000230228	0.00993401	UP			100525318
ENSSSCG00000004017	95.6747	2.71651	0.695594	3.90531	9.41048e-05	0.00501924	UP		FERM domain containing 1 [Source:VGNC Symbol;Acc:VGNC:88236]	100514201
ENSSSCG00000000207	191.505	2.70121	0.601298	4.4923	7.04571e-06	0.000675578	UP			NA
ENSSSCG00000039476	48.3217	2.67868	0.313437	8.54615	1.27268e-17	2.57096e-14	UP			102159510
ENSSSCG00000017556	15.9719	2.65972	0.693718	3.834	0.000126076	0.00617289	UP	ANKRD40CL	ANKRD40 C-terminal like [Source:VGNC Symbol;Acc:VGNC:108038]	100626580
ENSSSCG00000046006	13.2111	2.58825	0.596958	4.33574	1.45271e-05	0.00119532	UP			NA
ENSSSCG00000031919	22.3632	2.5257	0.500282	5.04856	4.45156e-07	6.54015e-05	UP			100515394
ENSSSCG00000003882	90.6497	2.44327	0.385827	6.33254	2.41154e-10	8.47238e-08	UP	SLC5A9	solute carrier family 5 member 9 [Source:VGNC Symbol;Acc:VGNC:93149]	100522082
ENSSSCG00000043301	8.48415	2.43244	0.718579	3.38507	0.000711604	0.0225053	UP	IFN-ALPHA-8	interferon-alpha-8 [Source:NCBI gene (formerly Entrezgene);Acc:100153724]	100153724
ENSSSCG00000029043	523.936	2.43056	0.220288	11.0335	2.63298e-28	2.12758e-24	UP			NA
ENSSSCG00000045167	12.152	2.41313	0.710008	3.39873	0.00067699	0.021708	UP			NA
ENSSSCG00000012367	11.2109	2.41172	0.656568	3.67322	0.000239515	0.0102017	UP	ZC3H12B	zinc finger CCCH-type containing 12B [Source:VGNC Symbol;Acc:VGNC:95090]	100623018
ENSSSCG00000009445	18.3531	2.3666	0.767576	3.08321	0.00204781	0.0465002	UP	PCDH8	protocadherin 8 [Source:HGNC Symbol;Acc:HGNC:8660]	100155738
ENSSSCG00000002450	39.0863	2.34006	0.309508	7.5606	4.01222e-14	3.56033e-11	UP	SLC24A4	solute carrier family 24 member 4 [Source:VGNC Symbol;Acc:VGNC:92988]	100156914
ENSSSCG00000035617	104.562	2.30199	0.306396	7.51314	5.77275e-14	4.44255e-11	UP			106505010
ENSSSCG00000011292	32.1485	2.20011	0.335112	6.56531	5.19246e-11	2.2083e-08	UP	ZNF662	zinc finger protein 662 [Source:VGNC Symbol;Acc:VGNC:95287]	100155776
ENSSSCG00000048813	7.23156	2.17149	0.672135	3.23074	0.00123469	0.0330363	UP			NA
ENSSSCG00000007549	50.5185	2.14986	0.595875	3.6079	0.000308691	0.0119922	UP	CYP2W1	cytochrome P450 family 2 subfamily W member 1 [Source:VGNC Symbol;Acc:VGNC:103553]	100522669
ENSSSCG00000007384	21.4287	2.11603	0.535711	3.94995	7.81668e-05	0.00441383	UP			100739507
ENSSSCG00000005278	151.356	2.10189	0.319273	6.58337	4.59906e-11	2.0088e-08	UP			NA
ENSSSCG00000001073	258.128	2.0995	0.254371	8.2537	1.53564e-16	2.06812e-13	UP	TPMT	thiopurine S-methyltransferase [Source:VGNC Symbol;Acc:VGNC:94340]	100157630
ENSSSCG00000011577	10.2098	2.09648	0.682163	3.07329	0.00211713	0.0476532	UP	SLC6A1	solute carrier family 6 member 1 [Source:VGNC Symbol;Acc:VGNC:93153]	100156668
ENSSSCG00000012427	375.965	2.0768	0.628365	3.30509	0.000949465	0.0274006	UP			100624650
ENSSSCG00000007527	31.6799	2.06272	0.626003	3.29507	0.000983978	0.0281104	UP		endothelin 3 [Source:VGNC Symbol;Acc:VGNC:96260]	100049663
ENSSSCG00000051146	15.1103	2.04285	0.526444	3.88047	0.000104254	0.00543502	UP			NA
ENSSSCG00000047929	32.6131	2.02424	0.384078	5.27039	1.36138e-07	2.29179e-05	UP			102162420
ENSSSCG00000028695	14.5047	2.01482	0.519145	3.88105	0.000104007	0.00543502	UP			100522845
ENSSSCG00000012589	46.1792	1.9656	0.289993	6.7781	1.2177e-11	6.14975e-09	UP	RTL4	retrotransposon Gag like 4 [Source:VGNC Symbol;Acc:VGNC:92497]	100524357
ENSSSCG00000044015	12.1608	1.87862	0.598658	3.13805	0.00170073	0.0412695	UP			NA
ENSSSCG00000030026	112.743	1.87355	0.262622	7.13404	9.74669e-13	5.62558e-10	UP	SORCS1	sortilin related VPS10 domain containing receptor 1 [Source:VGNC Symbol;Acc:VGNC:93339]	100155686
ENSSSCG00000005199	47.4068	1.82838	0.366967	4.9824	6.28015e-07	8.90294e-05	UP	GLDC	glycine decarboxylase [Source:VGNC Symbol;Acc:VGNC:88478]	100155425
ENSSSCG00000045670	51.9571	1.73662	0.478606	3.62851	0.000285066	0.0114638	UP			NA
ENSSSCG00000010629	23.7658	1.72747	0.556046	3.1067	0.00189191	0.044475	UP	ADRA2A	adrenoceptor alpha 2A [Source:VGNC Symbol;Acc:VGNC:85156]	399501
ENSSSCG00000012053	25.7427	1.72664	0.519823	3.32158	0.000895085	0.0266399	UP	CBR3	carbonyl reductase 3 [Source:VGNC Symbol;Acc:VGNC:86228]	100512990
ENSSSCG00000049725	19.1666	1.70218	0.518411	3.28346	0.00102541	0.0290222	UP			NA
ENSSSCG00000035074	36.0798	1.70202	0.374179	4.54868	5.39837e-06	0.000535234	UP	FOXO6	forkhead box O6 [Source:VGNC Symbol;Acc:VGNC:107141]	110261252
ENSSSCG00000001804	30.5635	1.69082	0.416829	4.0564	4.98346e-05	0.00318331	UP	HOMER2	homer scaffold protein 2 [Source:VGNC Symbol;Acc:VGNC:88929]	100156419
ENSSSCG00000051637	90.1903	1.67651	0.396411	4.22922	2.34503e-05	0.00173844	UP			NA
ENSSSCG00000040418	12.0195	1.66339	0.521164	3.19168	0.00141447	0.0357175	UP	FSIP1	fibrous sheath interacting protein 1 [Source:VGNC Symbol;Acc:VGNC:88254]	100737163
ENSSSCG00000031865	3832.69	1.65801	0.17303	9.58224	9.49617e-22	3.83669e-18	UP	AQP8	aquaporin 8 [Source:VGNC Symbol;Acc:VGNC:85435]	100127152
ENSSSCG00000043954	22.3634	1.63269	0.493234	3.31017	0.000932409	0.0271998	UP			NA
ENSSSCG00000000607	48.7675	1.62389	0.44956	3.61217	0.000303644	0.0119107	UP	ART4	ADP-ribosyltransferase 4 [Source:VGNC Symbol;Acc:VGNC:103218]	100152653
ENSSSCG00000017520	27.6131	1.58496	0.333773	4.74863	2.04803e-06	0.000238116	UP	LRRC46	leucine rich repeat containing 46 [Source:VGNC Symbol;Acc:VGNC:89844]	100519171
ENSSSCG00000039244	479.693	1.57839	0.450082	3.5069	0.000453368	0.0160277	UP	PHYH	phytanoyl-CoA 2-hydroxylase [Source:VGNC Symbol;Acc:VGNC:96483]	100134962
ENSSSCG00000031216	20.6162	1.56878	0.497157	3.15551	0.00160218	0.0393508	UP	HS3ST6	heparan sulfate-glucosamine 3-sulfotransferase 6 [Source:VGNC Symbol;Acc:VGNC:88980]	110259947
ENSSSCG00000035887	26.3456	1.56517	0.428525	3.65245	0.000259747	0.0107912	UP	C8orf34	chromosome 4 C8orf34 homolog [Source:VGNC Symbol;Acc:VGNC:86034]	100524083
ENSSSCG00000044762	32.5101	1.50534	0.394076	3.81993	0.000133491	0.00645912	UP	CCL11	chemokine (C-C motif) ligand 11 [Source:NCBI gene (formerly Entrezgene);Acc:100038010]	100038010
ENSSSCG00000028871	406.161	1.48422	0.167848	8.84261	9.35108e-19	2.1589e-15	UP	CSTA	cystatin A [Source:HGNC Symbol;Acc:HGNC:2481]	396866
ENSSSCG00000031849	27.2738	1.46952	0.437091	3.36204	0.000773695	0.0239994	UP			NA
ENSSSCG00000040770	35997.2	1.46371	0.134983	10.8436	2.13811e-27	1.1518e-23	UP	CA1	carbonic anhydrase 1 [Source:VGNC Symbol;Acc:VGNC:98744]	100153915
ENSSSCG00000027322	65.7471	1.46039	0.417006	3.50209	0.000461619	0.0161827	UP	PGLYRP3	peptidoglycan recognition protein 3 [Source:VGNC Symbol;Acc:VGNC:91354]	100626786
ENSSSCG00000040934	1346.04	1.45641	0.241232	6.03738	1.56639e-09	4.44112e-07	UP	ISX	intestine specific homeobox [Source:VGNC Symbol;Acc:VGNC:96164]	100626910
ENSSSCG00000012392	18.299	1.45478	0.427492	3.40305	0.000666372	0.0215817	UP			NA
ENSSSCG00000015425	52.4443	1.44983	0.258896	5.60006	2.14284e-08	5.01889e-06	UP	SLC26A5	solute carrier family 26 member 5 [Source:VGNC Symbol;Acc:VGNC:93030]	100190993
ENSSSCG00000050547	49.5145	1.41423	0.306786	4.60983	4.02999e-06	0.000422913	UP			NA
ENSSSCG00000039888	32.4488	1.40636	0.42153	3.33633	0.000848938	0.0256443	UP	STXBP5L	syntaxin binding protein 5L [Source:VGNC Symbol;Acc:VGNC:93600]	100620808
ENSSSCG00000009649	109.034	1.39667	0.259255	5.38723	7.15525e-08	1.37953e-05	UP	NEFL	neurofilament light chain [Source:VGNC Symbol;Acc:VGNC:90670]	100521224
ENSSSCG00000029419	18.6458	1.39656	0.412	3.3897	0.000699692	0.0222156	UP	SCN11A	sodium voltage-gated channel alpha subunit 11 [Source:VGNC Symbol;Acc:VGNC:92631]	100739142
ENSSSCG00000029592	1725.78	1.39429	0.217257	6.41771	1.38338e-10	5.32305e-08	UP	GPRC5A	G protein-coupled receptor class C group 5 member A [Source:VGNC Symbol;Acc:VGNC:88642]	100624186
ENSSSCG00000004565	3441.61	1.38691	0.171761	8.07462	6.76884e-16	7.81366e-13	UP	CA12	carbonic anhydrase 12 [Source:VGNC Symbol;Acc:VGNC:86097]	100152749
ENSSSCG00000017208	243.508	1.3663	0.225461	6.06002	1.36101e-09	4.15004e-07	UP	SLC25A19	solute carrier family 25 member 19 [Source:VGNC Symbol;Acc:VGNC:92997]	100302700
ENSSSCG00000034821	43.9193	1.3637	0.279932	4.87153	1.10737e-06	0.000143169	UP	ARMCX4	armadillo repeat containing X-linked 4 [Source:HGNC Symbol;Acc:HGNC:28615]	110257665
ENSSSCG00000035152	200.106	1.35572	0.224271	6.04501	1.49398e-09	4.42143e-07	UP	TEF	TEF transcription factor, PAR bZIP family member [Source:VGNC Symbol;Acc:VGNC:93864]	110260633
ENSSSCG00000043761	1818.32	1.34308	0.181339	7.40648	1.29693e-13	9.11288e-11	UP			NA
ENSSSCG00000021866	146.044	1.34069	0.382423	3.50579	0.000455253	0.0160291	UP	EDDM3B	epididymal protein 3B [Source:NCBI gene (formerly Entrezgene);Acc:397204]	397204
ENSSSCG00000039009	201.412	1.31734	0.182251	7.22817	4.8956e-13	3.16471e-10	UP			100153374
ENSSSCG00000009125	199.117	1.31414	0.303374	4.33175	1.47929e-05	0.00119576	UP			100512728
ENSSSCG00000046312	47.8346	1.30963	0.332519	3.93852	8.19874e-05	0.00451484	UP			NA
ENSSSCG00000033766	34.034	1.29507	0.32543	3.97957	6.90389e-05	0.00402793	UP		electron transfer flavoprotein subunit beta lysine methyltransferase [Source:VGNC Symbol;Acc:VGNC:103234]	110260714
ENSSSCG00000006141	57.1816	1.29391	0.348574	3.71201	0.000205623	0.00907944	UP	CA3	carbonic anhydrase 3 [Source:VGNC Symbol;Acc:VGNC:86099]	494016
ENSSSCG00000010483	351.097	1.26973	0.2102	6.04055	1.53586e-09	4.43231e-07	UP	PLCE1	phospholipase C epsilon 1 [Source:VGNC Symbol;Acc:VGNC:91519]	100157745
ENSSSCG00000034746	138.051	1.25454	0.227121	5.52366	3.32002e-08	7.25065e-06	UP	CAPN8	calpain 8 [Source:VGNC Symbol;Acc:VGNC:95631]	100625563
ENSSSCG00000016784	203.56	1.24966	0.34422	3.6304	0.000282979	0.0114617	UP	ANKH	ANKH inorganic pyrophosphate transport regulator [Source:VGNC Symbol;Acc:VGNC:85315]	100624458
ENSSSCG00000021813	10296.9	1.24	0.208288	5.95333	2.62743e-09	7.32101e-07	UP	SLC26A3	solute carrier family 26 member 3 [Source:VGNC Symbol;Acc:VGNC:93028]	100170644
ENSSSCG00000009648	75.5748	1.21783	0.34903	3.48918	0.000484514	0.0166956	UP			100625407
ENSSSCG00000004573	94.2848	1.20086	0.37617	3.19232	0.00141136	0.0356947	UP			100152206
ENSSSCG00000030150	9300.54	1.18455	0.142122	8.33474	7.76661e-17	1.14106e-13	UP	UGDH	UDP-glucose 6-dehydrogenase [Source:VGNC Symbol;Acc:VGNC:94686]	100627727
ENSSSCG00000024018	147.513	1.18192	0.309083	3.82395	0.000131329	0.0063736	UP	SLC16A3	solute carrier family 16 member 3 [Source:VGNC Symbol;Acc:VGNC:92943]	100158243
ENSSSCG00000022724	714.618	1.16838	0.192566	6.06744	1.29965e-09	4.03917e-07	UP			100624891
ENSSSCG00000014561	147.956	1.14913	0.252114	4.55796	5.16541e-06	0.000518498	UP	NLRP6	NLR family pyrin domain containing 6 [Source:VGNC Symbol;Acc:VGNC:90786]	100519245
ENSSSCG00000016792	145.436	1.14608	0.300218	3.81749	0.000134817	0.00650382	UP	RETREG1	reticulophagy regulator 1 [Source:VGNC Symbol;Acc:VGNC:92223]	100625174
ENSSSCG00000039341	2691.81	1.14233	0.173398	6.58793	4.46005e-11	2.00219e-08	UP		sulfotransferase family 1E, estrogen-preferring, member 1 [Source:NCBI gene (formerly Entrezgene);Acc:397052]	397052
ENSSSCG00000048791	30.5725	1.14022	0.325822	3.49953	0.000466075	0.0162683	UP			NA
ENSSSCG00000003148	44.7761	1.1364	0.287146	3.95757	7.57167e-05	0.00432388	UP	DBP	D-box binding PAR bZIP transcription factor [Source:VGNC Symbol;Acc:VGNC:87167]	100524747
ENSSSCG00000006413	109.083	1.13506	0.350023	3.2428	0.00118359	0.0321417	UP	FCER1A	Fc fragment of IgE receptor Ia [Source:VGNC Symbol;Acc:VGNC:88060]	100152827
ENSSSCG00000022953	57.5738	1.13208	0.236851	4.77972	1.75541e-06	0.000211711	UP	PTER	phosphotriesterase related [Source:VGNC Symbol;Acc:VGNC:96514]	100625702
ENSSSCG00000008586	93.5041	1.13194	0.210131	5.38685	7.1704e-08	1.37953e-05	UP	TP53I3	tumor protein p53 inducible protein 3 [Source:VGNC Symbol;Acc:VGNC:94328]	100521786
ENSSSCG00000051625	22.0628	1.13061	0.353332	3.19984	0.00137505	0.035106	UP			NA
ENSSSCG00000003080	106.381	1.12801	0.279168	4.0406	5.33136e-05	0.00334809	UP		immunoglobulin superfamily member 23 [Source:VGNC Symbol;Acc:VGNC:89066]	100524810
ENSSSCG00000004923	376.231	1.12638	0.282986	3.98034	6.88159e-05	0.00402793	UP	SLC51B	solute carrier family 51 subunit beta [Source:VGNC Symbol;Acc:VGNC:93139]	100525144
ENSSSCG00000029536	121.553	1.10915	0.28942	3.83232	0.00012694	0.00617917	UP	SCTR	secretin receptor [Source:VGNC Symbol;Acc:VGNC:95482]	100521045
ENSSSCG00000000385	96.659	1.10476	0.273615	4.03763	5.39938e-05	0.00334809	UP	SLC39A5	solute carrier family 39 member 5 [Source:VGNC Symbol;Acc:VGNC:93106]	100155542
ENSSSCG00000027017	379.769	1.09834	0.240585	4.56529	4.988e-06	0.000503819	UP		nuclear receptor subfamily 1 group D member 2 [Source:VGNC Symbol;Acc:VGNC:99726]	100621076
ENSSSCG00000029843	175.505	1.08963	0.19278	5.6522	1.58411e-08	3.76482e-06	UP	NPHP4	nephrocystin 4 [Source:HGNC Symbol;Acc:HGNC:19104]	NA
ENSSSCG00000010664	39.6498	1.08276	0.324451	3.33721	0.000846248	0.0256109	UP	ENO4	enolase 4 [Source:VGNC Symbol;Acc:VGNC:87704]	100158218
ENSSSCG00000026180	75.7025	1.07997	0.21728	4.97042	6.68087e-07	9.30771e-05	UP	NRXN1	neurexin 1 [Source:HGNC Symbol;Acc:HGNC:8008]	100519087
ENSSSCG00000035018	46.7733	1.07855	0.324912	3.31951	0.000901755	0.0267891	UP	GABRD	gamma-aminobutyric acid type A receptor subunit delta [Source:VGNC Symbol;Acc:VGNC:88309]	100623754
ENSSSCG00000039413	14213.4	1.07438	0.341306	3.14785	0.00164478	0.040153	UP	SLC9A3	solute carrier family 9 member A3 [Source:VGNC Symbol;Acc:VGNC:93183]	397358
ENSSSCG00000024058	103.8	1.06578	0.243957	4.36875	1.2496e-05	0.00108574	UP	SLC5A2	solute carrier family 5 member 2 [Source:VGNC Symbol;Acc:VGNC:93143]	100286743
ENSSSCG00000009638	179.06	1.06264	0.259039	4.10224	4.09163e-05	0.00272399	UP			100152436
ENSSSCG00000039522	40.4891	1.05438	0.300267	3.51148	0.000445619	0.0158278	UP	SHISAL1	shisa like 1 [Source:VGNC Symbol;Acc:VGNC:92850]	100522865
ENSSSCG00000024666	70.8337	1.05204	0.273744	3.84316	0.00012146	0.00603053	UP		FXYD domain containing ion transport regulator 3 [Source:VGNC Symbol;Acc:VGNC:97060]	397413
ENSSSCG00000051585	138.715	1.05126	0.25432	4.13362	3.57086e-05	0.00245569	UP	TANGO6	transport and golgi organization 6 homolog [Source:HGNC Symbol;Acc:HGNC:25749]	110260922
ENSSSCG00000010753	993.079	1.04811	0.201421	5.20359	1.95474e-07	3.22353e-05	UP	CLRN3	clarin 3 [Source:VGNC Symbol;Acc:VGNC:86782]	100156267
ENSSSCG00000010885	208.796	1.03531	0.26472	3.91096	9.1931e-05	0.00493587	UP	TLR5	toll like receptor 5 [Source:NCBI gene (formerly Entrezgene);Acc:100144476]	100144476
ENSSSCG00000033333	764.019	1.02857	0.224185	4.58804	4.47427e-06	0.00045765	UP	FER1L6	fer-1 like family member 6 [Source:VGNC Symbol;Acc:VGNC:88086]	100620175
ENSSSCG00000002764	466.535	1.02573	0.190588	5.38191	7.37011e-08	1.40127e-05	UP	SMPD3	sphingomyelin phosphodiesterase 3 [Source:VGNC Symbol;Acc:VGNC:93263]	100518128
ENSSSCG00000042150	274.962	1.02498	0.136376	7.51582	5.65546e-14	4.44255e-11	UP			NA
ENSSSCG00000016920	1076.32	0.99504	0.140328	7.09083	1.3331e-12	7.42902e-10	UP	MIER3	MIER family member 3 [Source:VGNC Symbol;Acc:VGNC:90221]	100522223
ENSSSCG00000012386	203.48	0.989128	0.169664	5.82992	5.54531e-09	1.44545e-06	UP	NALF2	NALCN channel auxiliary factor 2 [Source:VGNC Symbol;Acc:VGNC:87911]	100518049
ENSSSCG00000024476	307.828	0.982713	0.158494	6.20033	5.6346e-10	1.82122e-07	UP	CES3	carboxylesterase 3 [Source:VGNC Symbol;Acc:VGNC:96948]	100626873
ENSSSCG00000039947	129.573	0.982293	0.180863	5.43113	5.59973e-08	1.11725e-05	UP	KCNJ2	potassium inwardly rectifying channel subfamily J member 2 [Source:VGNC Symbol;Acc:VGNC:89357]	397293
ENSSSCG00000011750	743.224	0.960024	0.152776	6.28386	3.30269e-10	1.13563e-07	UP	PLD1	phospholipase D1 [Source:VGNC Symbol;Acc:VGNC:91525]	100519446
ENSSSCG00000024809	315.105	0.957942	0.197475	4.85094	1.22877e-06	0.000156364	UP	CLCN4	chloride voltage-gated channel 4 [Source:VGNC Symbol;Acc:VGNC:86728]	100151985
ENSSSCG00000017998	120.854	0.955374	0.223668	4.2714	1.94252e-05	0.0014949	UP	GLP2R	glucagon like peptide 2 receptor [Source:VGNC Symbol;Acc:VGNC:88490]	100515966
ENSSSCG00000002932	62.4889	0.953329	0.28755	3.31535	0.000915286	0.0269926	UP	ZNF567	zinc finger protein 567 [Source:VGNC Symbol;Acc:VGNC:95265]	100525521
ENSSSCG00000036755	132.451	0.947439	0.26105	3.62933	0.000284156	0.0114638	UP	TENT5B	terminal nucleotidyltransferase 5B [Source:VGNC Symbol;Acc:VGNC:93874]	100511570
ENSSSCG00000034515	65.2898	0.918065	0.287366	3.19476	0.00139945	0.0354982	UP			100517427
ENSSSCG00000031267	81.8806	0.912992	0.206023	4.43152	9.35731e-06	0.000854718	UP	NIPAL2	NIPA like domain containing 2 [Source:VGNC Symbol;Acc:VGNC:90749]	100522074
ENSSSCG00000006933	27605.1	0.906046	0.224283	4.03975	5.35088e-05	0.00334809	UP	CLCA1	chloride channel accessory 1 [Source:VGNC Symbol;Acc:VGNC:86722]	397284
ENSSSCG00000015917	61.742	0.886576	0.226461	3.91492	9.04351e-05	0.00488251	UP	XIRP2	xin actin binding repeat containing 2 [Source:HGNC Symbol;Acc:HGNC:14303]	397689
ENSSSCG00000025423	525.942	0.885103	0.244608	3.61845	0.000296376	0.0117108	UP	KCNK5	potassium two pore domain channel subfamily K member 5 [Source:VGNC Symbol;Acc:VGNC:89372]	100154866
ENSSSCG00000003928	359.421	0.881248	0.140963	6.25162	4.06212e-10	1.36767e-07	UP	PLK3	polo like kinase 3 [Source:VGNC Symbol;Acc:VGNC:91564]	397250
ENSSSCG00000016568	5785.18	0.878392	0.129077	6.80519	1.00914e-11	5.26088e-09	UP	AHCYL2	adenosylhomocysteinase like 2 [Source:VGNC Symbol;Acc:VGNC:97874]	100514931
ENSSSCG00000012050	2002.05	0.8751	0.130525	6.70444	2.02177e-11	9.90114e-09	UP		regulator of calcineurin 1 [Source:VGNC Symbol;Acc:VGNC:92170]	100511902
ENSSSCG00000004789	2855.6	0.872141	0.195808	4.45406	8.42607e-06	0.000787131	UP	THBS1	thrombospondin 1 [Source:VGNC Symbol;Acc:VGNC:93946]	492313
ENSSSCG00000029388	907.832	0.861994	0.180582	4.77343	1.81112e-06	0.000216812	UP	PDE2A	phosphodiesterase 2A [Source:VGNC Symbol;Acc:VGNC:91251]	100737701
ENSSSCG00000011246	955.435	0.846329	0.160182	5.28354	1.26711e-07	2.17849e-05	UP	VILL	villin like [Source:VGNC Symbol;Acc:VGNC:94825]	100628102
ENSSSCG00000022099	1129.8	0.843372	0.175599	4.80284	1.56431e-06	0.00019238	UP	TP53INP2	tumor protein p53 inducible nuclear protein 2 [Source:VGNC Symbol;Acc:VGNC:95737]	100152247
ENSSSCG00000045919	60.0135	0.842838	0.265058	3.17982	0.00147365	0.0369236	UP			NA
ENSSSCG00000045813	60.5164	0.842241	0.27038	3.11503	0.00183928	0.0435207	UP			NA
ENSSSCG00000022726	176.564	0.825955	0.196596	4.20128	2.65408e-05	0.00189807	UP	RHOD	ras homolog family member D [Source:VGNC Symbol;Acc:VGNC:92287]	100625773
ENSSSCG00000013100	205.786	0.823211	0.186919	4.40409	1.06227e-05	0.000948475	UP			100525275
ENSSSCG00000004598	150.779	0.822463	0.233091	3.52851	0.000417913	0.0152458	UP			100154487
ENSSSCG00000008712	74.091	0.82135	0.261373	3.14245	0.00167541	0.0408391	UP	PPP2R2C	protein phosphatase 2 regulatory subunit Bgamma [Source:VGNC Symbol;Acc:VGNC:91749]	100737053
ENSSSCG00000011400	566.394	0.819318	0.198271	4.13231	3.5913e-05	0.00245928	UP	SEMA3B	semaphorin 3B [Source:VGNC Symbol;Acc:VGNC:92694]	100153200
ENSSSCG00000036427	62.383	0.815793	0.248245	3.28624	0.00101534	0.0288382	UP		free fatty acid receptor 2-like [Source:NCBI gene (formerly Entrezgene);Acc:100517472]	100517472
ENSSSCG00000022857	4870.74	0.80919	0.182741	4.42806	9.50855e-06	0.000863301	UP	TFF3	trefoil factor 3 [Source:HGNC Symbol;Acc:HGNC:11757]	NA
ENSSSCG00000007753	234.109	0.806947	0.199021	4.05458	5.02248e-05	0.0031956	UP	RUSF1	RUS family member 1 [Source:VGNC Symbol;Acc:VGNC:86014]	102165338
ENSSSCG00000040267	85.3941	0.806081	0.263048	3.06438	0.0021812	0.0489589	UP			110260059
ENSSSCG00000023784	168.841	0.80587	0.196463	4.10189	4.09789e-05	0.00272399	UP	SEMA3C	semaphorin 3C [Source:VGNC Symbol;Acc:VGNC:92695]	100624508
ENSSSCG00000037530	647.757	0.804367	0.228356	3.52242	0.000427625	0.015426	UP	TACC2	transforming acidic coiled-coil containing protein 2 [Source:NCBI gene (formerly Entrezgene);Acc:100152804]	100152804
ENSSSCG00000011037	621.689	0.799657	0.233472	3.42506	0.000614655	0.0201899	UP	TMEM236	transmembrane protein 236 [Source:VGNC Symbol;Acc:VGNC:96006]	100523460
ENSSSCG00000033185	257.247	0.798846	0.241609	3.30636	0.000945153	0.0274006	UP	PPP2R3A	protein phosphatase 2 regulatory subunit B''alpha [Source:HGNC Symbol;Acc:HGNC:9307]	102160080
ENSSSCG00000001989	243.104	0.798484	0.254137	3.14194	0.00167832	0.0408483	UP	CIDEB	cell death inducing DFFA like effector b [Source:VGNC Symbol;Acc:VGNC:86699]	100127160
ENSSSCG00000010772	151.393	0.796871	0.183785	4.33588	1.4518e-05	0.00119532	UP	ADAM8	ADAM metallopeptidase domain 8 [Source:VGNC Symbol;Acc:VGNC:97866]	100156146
ENSSSCG00000033539	371.657	0.788552	0.165884	4.75363	1.99793e-06	0.000233975	UP	CRYBG2	crystallin beta-gamma domain containing 2 [Source:VGNC Symbol;Acc:VGNC:87019]	110261120
ENSSSCG00000027275	1353.55	0.779068	0.16224	4.80194	1.57133e-06	0.00019238	UP	HHLA2	HERV-H LTR-associating 2 [Source:VGNC Symbol;Acc:VGNC:88876]	102166962
ENSSSCG00000047083	134.944	0.775632	0.230855	3.35982	0.000779933	0.0241004	UP	H2BC21	H2B clustered histone 21 [Source:HGNC Symbol;Acc:HGNC:4760]	100738744
ENSSSCG00000000413	1526.67	0.775557	0.132519	5.8524	4.84523e-09	1.30506e-06	UP	MYO1A	myosin IA [Source:VGNC Symbol;Acc:VGNC:90525]	100739662
ENSSSCG00000029260	73.0162	0.772056	0.232139	3.32584	0.000881538	0.0262851	UP	NDNF	neuron derived neurotrophic factor [Source:VGNC Symbol;Acc:VGNC:90629]	100738736
ENSSSCG00000035189	200.033	0.770619	0.193621	3.98004	6.89033e-05	0.00402793	UP			100522166
ENSSSCG00000024800	2905.01	0.767135	0.118958	6.44881	1.12733e-10	4.55471e-08	UP	DSC2	desmocollin 2 [Source:HGNC Symbol;Acc:HGNC:3036]	100623651
ENSSSCG00000039779	377.897	0.76506	0.220873	3.46381	0.000532588	0.0180823	UP	CHGB	chromogranin B [Source:VGNC Symbol;Acc:VGNC:95908]	397154
ENSSSCG00000024791	145.782	0.764462	0.206526	3.70153	0.000214301	0.00941119	UP		CD59 molecule [Source:VGNC Symbol;Acc:VGNC:99615]	397347
ENSSSCG00000015413	627.714	0.762661	0.209821	3.63482	0.000278177	0.0113208	UP	FGL2	fibrinogen like 2 [Source:VGNC Symbol;Acc:VGNC:88123]	448808
ENSSSCG00000006328	162.474	0.758979	0.244246	3.10743	0.00188722	0.044475	UP	RXRG	retinoid X receptor gamma [Source:VGNC Symbol;Acc:VGNC:92530]	445465
ENSSSCG00000035243	414.322	0.754718	0.164061	4.60022	4.22043e-06	0.000440041	UP	RAB27B	RAB27B, member RAS onco family [Source:VGNC Symbol;Acc:VGNC:98250]	100154771
ENSSSCG00000010779	109.155	0.754712	0.234547	3.21774	0.00129204	0.0341508	UP	SYCE1	synaptonemal complex central element protein 1 [Source:VGNC Symbol;Acc:VGNC:93650]	100156954
ENSSSCG00000023630	119.385	0.749851	0.204179	3.67251	0.000240176	0.0102017	UP	CPM	carboxypeptidase M [Source:VGNC Symbol;Acc:VGNC:86947]	100628221
ENSSSCG00000010962	71.4678	0.746628	0.220794	3.38156	0.000720759	0.0227504	UP	FRMD3	FERM domain containing 3 [Source:VGNC Symbol;Acc:VGNC:96031]	100519727
ENSSSCG00000025870	644.625	0.743709	0.204989	3.62805	0.000285573	0.0114638	UP	HEPACAM2	HEPACAM family member 2 [Source:VGNC Symbol;Acc:VGNC:88846]	100626473
ENSSSCG00000009225	1271.84	0.74324	0.16003	4.64438	3.411e-06	0.000360295	UP	HSD17B11	hydroxysteroid 17-beta dehydrogenase 13 [Source:NCBI gene (formerly Entrezgene);Acc:100626886]	100520923
ENSSSCG00000002456	976.962	0.741564	0.188227	3.93973	8.15722e-05	0.00451468	UP	CHGA	chromogranin A [Source:VGNC Symbol;Acc:VGNC:103919]	397540
ENSSSCG00000035657	934.067	0.738631	0.149955	4.92568	8.40665e-07	0.000111361	UP	DIP2A	disco interacting A [Source:VGNC Symbol;Acc:VGNC:95836]	100621280
ENSSSCG00000011734	223.975	0.73658	0.175538	4.19612	2.71526e-05	0.00192462	UP	ARL14	ADP ribosylation factor like GTPase 14 [Source:VGNC Symbol;Acc:VGNC:85517]	100515798
ENSSSCG00000010212	1174.12	0.732227	0.162436	4.50778	6.55109e-06	0.000633965	UP			100154687
ENSSSCG00000009166	140.122	0.731136	0.192169	3.80464	0.00014201	0.00678999	UP	MANBA	mannosidase beta [Source:VGNC Symbol;Acc:VGNC:89970]	100524326
ENSSSCG00000040275	107.234	0.726539	0.208209	3.48946	0.000483994	0.0166956	UP	HEBP1	heme binding protein 1 [Source:VGNC Symbol;Acc:VGNC:88830]	494567
ENSSSCG00000003225	474.538	0.724245	0.194813	3.71764	0.000201094	0.00890377	UP		CEA cell adhesion molecule 18 [Source:VGNC Symbol;Acc:VGNC:86530]	100624721
ENSSSCG00000016267	4981.52	0.724091	0.114313	6.33429	2.38432e-10	8.47238e-08	UP	ITM2C	integral membrane protein 2C [Source:VGNC Symbol;Acc:VGNC:96383]	100144481
ENSSSCG00000038660	317.821	0.72296	0.184624	3.91584	9.00902e-05	0.00488251	UP	HAAO	3-hydroxyanthranilate 3,4-dioxygenase [Source:VGNC Symbol;Acc:VGNC:88765]	100514283
ENSSSCG00000016522	245.432	0.721856	0.165892	4.35136	1.35296e-05	0.0011538	UP	PTN	pleiotrophin [Source:VGNC Symbol;Acc:VGNC:91965]	397609
ENSSSCG00000012462	1107.99	0.717769	0.160973	4.45894	8.23645e-06	0.000773891	UP	POF1B	POF1B actin binding protein [Source:VGNC Symbol;Acc:VGNC:91620]	100523581
ENSSSCG00000010672	174.613	0.717621	0.198818	3.60944	0.000306853	0.0119784	UP	RAB11FIP2	RAB11 family interacting protein 2 [Source:VGNC Symbol;Acc:VGNC:92039]	100153733
ENSSSCG00000008237	3853.72	0.717591	0.170808	4.20115	2.65567e-05	0.00189807	UP	RETSAT	retinol saturase [Source:VGNC Symbol;Acc:VGNC:92225]	100519138
ENSSSCG00000036723	11728.1	0.713284	0.145539	4.90099	9.53544e-07	0.000124276	UP	EMP1	epithelial membrane protein 1 [Source:VGNC Symbol;Acc:VGNC:87688]	100101477
ENSSSCG00000032715	1232.28	0.712806	0.173581	4.10647	4.01758e-05	0.00269411	UP	CERS6	ceramide synthase 6 [Source:VGNC Symbol;Acc:VGNC:96025]	100126279
ENSSSCG00000002341	541.134	0.71182	0.156333	4.55323	5.28288e-06	0.000527016	UP	PAPLN	papilin, proteoglycan like sulfated glycoprotein [Source:VGNC Symbol;Acc:VGNC:91169]	100523451
ENSSSCG00000015960	246.003	0.711421	0.192118	3.70303	0.000213039	0.00938127	UP	MAP3K20	mitogen-activated protein kinase kinase kinase 20 [Source:HGNC Symbol;Acc:HGNC:17797]	100152572
ENSSSCG00000008153	1281.34	0.71082	0.150371	4.72711	2.27742e-06	0.000259193	UP	SLC9A2	solute carrier family 9 member A2 [Source:VGNC Symbol;Acc:VGNC:93182]	100101921
ENSSSCG00000009039	158.151	0.710298	0.161877	4.38788	1.14461e-05	0.00100532	UP	MMAA	metabolism of cobalamin associated A [Source:HGNC Symbol;Acc:HGNC:18871]	100523624
ENSSSCG00000044913	240.46	0.706238	0.164224	4.30045	1.70454e-05	0.001357	UP			NA
ENSSSCG00000005282	1007.51	0.705656	0.141352	4.99217	5.97041e-07	8.54786e-05	UP	VPS13A	vacuolar protein sorting 13 homolog A [Source:VGNC Symbol;Acc:VGNC:94838]	100153747
ENSSSCG00000027387	4157.13	0.705312	0.182381	3.86725	0.000110069	0.00566506	UP	MS4A12	membrane spanning 4-domains A12 [Source:VGNC Symbol;Acc:VGNC:90408]	100627859
ENSSSCG00000035045	1817.48	0.701442	0.177922	3.94241	8.06655e-05	0.00451468	UP	DOCK1	dedicator of cytokinesis 1 [Source:VGNC Symbol;Acc:VGNC:87390]	100524831
ENSSSCG00000020941	121.849	0.698789	0.218494	3.19821	0.00138283	0.035249	UP	LTB4R2	leukotriene B4 receptor 2 [Source:VGNC Symbol;Acc:VGNC:89884]	100156094
ENSSSCG00000040815	901.282	0.698382	0.1946	3.5888	0.000332202	0.0126621	UP	DUSP5	dual specificity phosphatase 5 [Source:VGNC Symbol;Acc:VGNC:87487]	100157144
ENSSSCG00000009268	869.72	0.696896	0.126421	5.51249	3.53797e-08	7.62362e-06	UP	CRYL1	crystallin lambda 1 [Source:VGNC Symbol;Acc:VGNC:87023]	396914
ENSSSCG00000038071	96.9996	0.693985	0.209947	3.30552	0.000947988	0.0274006	UP	RASL12	RAS like family 12 [Source:VGNC Symbol;Acc:VGNC:92121]	100155433
ENSSSCG00000004617	308.963	0.69373	0.212441	3.26552	0.00109264	0.0303926	UP	FAM214A	family with sequence similarity 214 member A [Source:VGNC Symbol;Acc:VGNC:87952]	100153621
ENSSSCG00000014163	205.097	0.691808	0.160129	4.32033	1.55798e-05	0.00125266	UP	SLF1	SMC5-SMC6 complex localization factor 1 [Source:VGNC Symbol;Acc:VGNC:93200]	100522125
ENSSSCG00000012315	707.508	0.689583	0.152919	4.50946	6.49933e-06	0.000632745	UP	SYNJ2	synaptojanin 2 [Source:VGNC Symbol;Acc:VGNC:93669]	100516167
ENSSSCG00000000139	86.611	0.688103	0.197863	3.47767	0.000505785	0.0173114	UP	IFT27	intraflagellar transport 27 [Source:VGNC Symbol;Acc:VGNC:98043]	100517032
ENSSSCG00000011962	2243.6	0.687848	0.126262	5.44778	5.10033e-08	1.03033e-05	UP	ADGRG7	adhesion G protein-coupled receptor G7 [Source:VGNC Symbol;Acc:VGNC:85134]	102160124
ENSSSCG00000050359	67.2682	0.683791	0.204317	3.34672	0.000817741	0.0249936	UP			NA
ENSSSCG00000000709	999.551	0.683358	0.203029	3.36581	0.000763185	0.0238105	UP	PLEKHG6	pleckstrin homology and RhoGEF domain containing G6 [Source:VGNC Symbol;Acc:VGNC:91548]	100520565
ENSSSCG00000015276	283.859	0.681113	0.172785	3.94196	8.08183e-05	0.00451468	UP	ETNK2	ethanolamine kinase 2 [Source:VGNC Symbol;Acc:VGNC:87807]	100622861
ENSSSCG00000033010	3979.56	0.679898	0.127573	5.32949	9.84914e-08	1.76858e-05	UP		AHNAK nucleoprotein [Source:VGNC Symbol;Acc:VGNC:96790]	106504153
ENSSSCG00000014976	333.578	0.678895	0.170258	3.98745	6.67869e-05	0.00395364	UP	ARHGAP42	Rho GTPase activating protein 42 [Source:VGNC Symbol;Acc:VGNC:85477]	100519555
ENSSSCG00000024109	1376.29	0.678516	0.137224	4.94458	7.63071e-07	0.000104508	UP	BDH1	3-hydroxybutyrate dehydrogenase 1 [Source:VGNC Symbol;Acc:VGNC:85792]	100511473
ENSSSCG00000001723	368.863	0.677342	0.155737	4.34928	1.36586e-05	0.00115569	UP	PLA2G7	phospholipase A2 group VII [Source:VGNC Symbol;Acc:VGNC:91501]	396593
ENSSSCG00000033190	289.558	0.676832	0.191777	3.52928	0.0004167	0.0152359	UP		aquaporin 1 (Colton blood group) [Source:NCBI gene (formerly Entrezgene);Acc:407773]	407773
ENSSSCG00000009646	263.866	0.675329	0.198608	3.40031	0.000673097	0.021674	UP	ADAM7	ADAM metallopeptidase domain 7 [Source:VGNC Symbol;Acc:VGNC:85070]	100157954
ENSSSCG00000007324	249.567	0.673295	0.215735	3.12094	0.00180276	0.0430345	UP	SOGA1	suppressor of glucose, autophagy associated 1 [Source:VGNC Symbol;Acc:VGNC:95740]	100152865
ENSSSCG00000000003	1337.69	0.67325	0.159295	4.22644	2.37413e-05	0.00175198	UP	TTC38	tetratricopeptide repeat domain 38 [Source:VGNC Symbol;Acc:VGNC:94550]	100518372
ENSSSCG00000014214	431.016	0.670965	0.192011	3.49441	0.000475117	0.0164419	UP	TRIM36	tripartite motif containing 36 [Source:VGNC Symbol;Acc:VGNC:94409]	100519890
ENSSSCG00000024232	139.556	0.665458	0.163064	4.08096	4.48501e-05	0.00289929	UP	CCDC91	coiled-coil domain containing 91 [Source:VGNC Symbol;Acc:VGNC:86329]	100513281
ENSSSCG00000023788	194.003	0.663108	0.164424	4.03293	5.50865e-05	0.00338499	UP		TBC1 domain family member 30 [Source:VGNC Symbol;Acc:VGNC:93775]	100623817
ENSSSCG00000037142	1372.62	0.661528	0.127293	5.19688	2.02661e-07	3.30828e-05	UP			110258364
ENSSSCG00000014286	544.977	0.661421	0.134847	4.90497	9.34403e-07	0.000122771	UP	SOWAHA	sosondowah ankyrin repeat domain family member A [Source:VGNC Symbol;Acc:VGNC:93347]	100524137
ENSSSCG00000002777	3094.8	0.656958	0.194813	3.37224	0.00074559	0.0233517	UP	HSD11B2	hydroxysteroid 11-beta dehydrogenase 2 [Source:VGNC Symbol;Acc:VGNC:88985]	396948
ENSSSCG00000024179	197.456	0.656522	0.179869	3.65	0.000262239	0.0108668	UP	NAGS	N-acetylglutamate synthase [Source:VGNC Symbol;Acc:VGNC:90571]	100048960
ENSSSCG00000017478	1105.53	0.651665	0.166744	3.90818	9.29936e-05	0.00497639	UP	RAPGEFL1	Rap guanine nucleotide exchange factor like 1 [Source:VGNC Symbol;Acc:VGNC:92095]	100525075
ENSSSCG00000009425	185.621	0.648009	0.167921	3.85901	0.000113845	0.00578957	UP			100153856
ENSSSCG00000000061	186.143	0.643427	0.171502	3.75171	0.00017563	0.00799555	UP	PMM1	phosphomannomutase 1 [Source:VGNC Symbol;Acc:VGNC:91589]	100151790
ENSSSCG00000004534	193.618	0.64223	0.200988	3.19536	0.00139655	0.0354982	UP	CCDC68	coiled-coil domain containing 68 [Source:VGNC Symbol;Acc:VGNC:86308]	100152360
ENSSSCG00000015873	86.4783	0.639084	0.199182	3.20855	0.00133407	0.034496	UP	ACVR1C	activin A receptor type 1C [Source:VGNC Symbol;Acc:VGNC:95873]	100156756
ENSSSCG00000012363	1111.01	0.636335	0.180273	3.52984	0.000415808	0.0152359	UP	HEPH	hephaestin [Source:VGNC Symbol;Acc:VGNC:88847]	100512938
ENSSSCG00000000273	6754.29	0.635948	0.170287	3.73456	0.000188047	0.00844175	UP	PRR13	proline rich 13 [Source:NCBI gene (formerly Entrezgene);Acc:100517160]	100517160
ENSSSCG00000034440	229.154	0.629676	0.176195	3.57376	0.000351896	0.0133812	UP	MMP28	matrix metallopeptidase 28 [Source:VGNC Symbol;Acc:VGNC:90278]	110256050
ENSSSCG00000005277	658.205	0.627282	0.197497	3.17616	0.00149239	0.0371626	UP	GCNT1	glucosaminyl (N-acetyl) transferase 1 [Source:VGNC Symbol;Acc:VGNC:103096]	106508649
ENSSSCG00000006252	356.531	0.625539	0.14747	4.24181	2.21721e-05	0.00167441	UP	TMEM68	transmembrane protein 68 [Source:VGNC Symbol;Acc:VGNC:94202]	100156514
ENSSSCG00000035774	524.756	0.624593	0.155646	4.0129	5.99768e-05	0.00360329	UP	ERRFI1	ERBB receptor feedback inhibitor 1 [Source:VGNC Symbol;Acc:VGNC:87784]	100738544
ENSSSCG00000040845	1871.32	0.620205	0.140767	4.4059	1.05346e-05	0.000945835	UP	AGPAT2	1-acylglycerol-3-phosphate O-acyltransferase 2 [Source:VGNC Symbol;Acc:VGNC:85184]	100170768
ENSSSCG00000006296	6102.84	0.616791	0.15861	3.88874	0.000100768	0.00530458	UP	ATP1B1	ATPase Na+/K+ transporting subunit beta 1 [Source:VGNC Symbol;Acc:VGNC:85642]	396898
ENSSSCG00000008943	4655.18	0.5882	0.174216	3.37627	0.000734767	0.0231174	UP	SLC4A4	solute carrier family 4 member 4 [Source:VGNC Symbol;Acc:VGNC:93133]	503546
ENSSSCG00000010280	318.47	0.586998	0.183106	3.20579	0.00134694	0.0347176	UP	VSIR	V-set immunoregulatory receptor [Source:VGNC Symbol;Acc:VGNC:94870]	100154373
ENSSSCG00000010698	324.927	0.585419	0.162343	3.60605	0.00031089	0.0120487	UP	FGFR2	fibroblast growth factor receptor 2 [Source:NCBI gene (formerly Entrezgene);Acc:396762]	396762
ENSSSCG00000027466	338.341	-0.588584	0.185081	-3.18014	0.00147206	0.0369236	DOWN	PCOLCE	procollagen C-endopeptidase enhancer [Source:VGNC Symbol;Acc:VGNC:91227]	100627524
ENSSSCG00000008456	171.17	-0.588687	0.15281	-3.85241	0.000116963	0.00591888	DOWN	PLEKHH2	pleckstrin homology, MyTH4 and FERM domain containing H2 [Source:VGNC Symbol;Acc:VGNC:91549]	100512894
ENSSSCG00000012591	250.728	-0.592602	0.163061	-3.63424	0.000278799	0.0113208	DOWN	AMOT	angiomotin [Source:VGNC Symbol;Acc:VGNC:85283]	100158213
ENSSSCG00000001427	6209.21	-0.593598	0.178187	-3.33131	0.000864374	0.0260059	DOWN	C4A	complement C4A (Rodgers blood group) [Source:NCBI gene (formerly Entrezgene);Acc:445467]	445467
ENSSSCG00000017203	235.311	-0.598745	0.170465	-3.51243	0.000444028	0.0158131	DOWN	GALK1	galactokinase 1 [Source:VGNC Symbol;Acc:VGNC:88326]	100521514
ENSSSCG00000005949	201.976	-0.605265	0.177225	-3.41523	0.000637283	0.0208063	DOWN		Src like adaptor [Source:VGNC Symbol;Acc:VGNC:92908]	100156099
ENSSSCG00000033983	434.276	-0.606152	0.176295	-3.43828	0.000585411	0.019387	DOWN	RRP7A	ribosomal RNA processing 7 homolog A [Source:HGNC Symbol;Acc:HGNC:24286]	100625121
ENSSSCG00000026812	416.631	-0.607191	0.161844	-3.75171	0.000175634	0.00799555	DOWN	EMG1	EMG1 N1-specific pseudouridine methyltransferase [Source:VGNC Symbol;Acc:VGNC:87678]	100627558
ENSSSCG00000006032	125.547	-0.607419	0.198628	-3.05807	0.00222766	0.0495885	DOWN	EMC2	ER membrane protein complex subunit 2 [Source:VGNC Symbol;Acc:VGNC:87670]	100739714
ENSSSCG00000038003	156.55	-0.612018	0.157753	-3.87961	0.000104626	0.00543685	DOWN	ITK	IL2 inducible T cell kinase [Source:VGNC Symbol;Acc:VGNC:89249]	100523474
ENSSSCG00000002035	276.602	-0.613512	0.146472	-4.18859	2.80693e-05	0.0019723	DOWN	C14orf119	chromosome 7 C14orf119 homolog [Source:VGNC Symbol;Acc:VGNC:86068]	100522881
ENSSSCG00000013473	231.401	-0.618206	0.188984	-3.27121	0.00107087	0.0300457	DOWN	GNA15	G protein subunit alpha 15 [Source:VGNC Symbol;Acc:VGNC:88520]	100518537
ENSSSCG00000032297	384.416	-0.61869	0.132182	-4.68059	2.86048e-06	0.000314477	DOWN			100153004
ENSSSCG00000001463	1402.06	-0.628627	0.19584	-3.2099	0.00132782	0.0344747	DOWN	PSMB9	proteasome 20S subunit beta 9 [Source:VGNC Symbol;Acc:VGNC:91911]	654294
ENSSSCG00000000418	117.982	-0.632445	0.195056	-3.24238	0.00118535	0.0321417	DOWN	TAC3	tachykinin 3 [Source:VGNC Symbol;Acc:VGNC:93698]	492314
ENSSSCG00000033180	169.207	-0.638882	0.184602	-3.46086	0.000538455	0.0181364	DOWN	PSMD10	proteasome 26S subunit, non-ATPase 10 [Source:VGNC Symbol;Acc:VGNC:91918]	100156308
ENSSSCG00000031212	131.453	-0.646749	0.156688	-4.12763	3.66526e-05	0.00247842	DOWN	CHML	CHM like Rab escort protein [Source:VGNC Symbol;Acc:VGNC:95911]	100521677
ENSSSCG00000032574	344.466	-0.648115	0.164576	-3.93809	8.21337e-05	0.00451484	DOWN	RTTN	rotatin [Source:VGNC Symbol;Acc:VGNC:92508]	100623296
ENSSSCG00000028210	857.918	-0.649729	0.117033	-5.55169	2.8292e-08	6.43982e-06	DOWN	NT5C	5', 3'-nucleotidase, cytosolic [Source:VGNC Symbol;Acc:VGNC:90918]	100526240
ENSSSCG00000026951	1991.48	-0.651869	0.203074	-3.21001	0.00132732	0.0344747	DOWN	PSMB8	proteasome 20S subunit beta 8 [Source:VGNC Symbol;Acc:VGNC:91910]	396975
ENSSSCG00000016444	818.239	-0.660166	0.164199	-4.02051	5.80722e-05	0.00353405	DOWN		transmembrane protein 176B [Source:VGNC Symbol;Acc:VGNC:94113]	100517619
ENSSSCG00000017926	133.606	-0.66363	0.171166	-3.87711	0.000105705	0.00547532	DOWN	SLC16A13	solute carrier family 16 member 13 [Source:VGNC Symbol;Acc:VGNC:92941]	100517000
ENSSSCG00000001866	365.644	-0.664367	0.133648	-4.97102	6.66009e-07	9.30771e-05	DOWN	RCN2	reticulocalbin 2 [Source:VGNC Symbol;Acc:VGNC:92181]	100153840
ENSSSCG00000016882	209.641	-0.669169	0.184562	-3.62571	0.000288165	0.0115273	DOWN	PARP8	poly(ADP-ribose) polymerase family member 8 [Source:HGNC Symbol;Acc:HGNC:26124]	100511108
ENSSSCG00000007079	166.594	-0.673509	0.198324	-3.396	0.000683793	0.0217964	DOWN	FLRT3	fibronectin leucine rich transmembrane protein 3 [Source:VGNC Symbol;Acc:VGNC:96304]	100158214
ENSSSCG00000013111	315.614	-0.677437	0.170825	-3.96568	7.31861e-05	0.00419418	DOWN	CD6	CD6 molecule [Source:VGNC Symbol;Acc:VGNC:86423]	100513519
ENSSSCG00000022131	96.3353	-0.680757	0.200223	-3.39999	0.000673879	0.021674	DOWN	KCTD6	potassium channel tetramerization domain containing 6 [Source:VGNC Symbol;Acc:VGNC:89402]	100516225
ENSSSCG00000028149	408.578	-0.68621	0.117371	-5.8465	5.02017e-09	1.33002e-06	DOWN	THYN1	thymocyte nuclear protein 1 [Source:VGNC Symbol;Acc:VGNC:93974]	100627444
ENSSSCG00000004157	334.579	-0.689158	0.166196	-4.14665	3.37375e-05	0.00235014	DOWN	IL20RA	interleukin 20 receptor subunit alpha [Source:VGNC Symbol;Acc:VGNC:89095]	100622457
ENSSSCG00000004569	108.879	-0.706652	0.181507	-3.89326	9.8908e-05	0.00524083	DOWN	LACTB	lactamase beta [Source:VGNC Symbol;Acc:VGNC:89614]	100152773
ENSSSCG00000007577	828.947	-0.707134	0.116204	-6.08528	1.16287e-09	3.68493e-07	DOWN	AP5Z1	adaptor related protein complex 5 subunit zeta 1 [Source:VGNC Symbol;Acc:VGNC:85397]	100513142
ENSSSCG00000015543	446.271	-0.707638	0.214358	-3.3012	0.000962733	0.0276846	DOWN	CACNA1E	calcium voltage-gated channel subunit alpha1 E [Source:VGNC Symbol;Acc:VGNC:86118]	100511769
ENSSSCG00000036553	389.154	-0.71155	0.206783	-3.44105	0.000579458	0.0192292	DOWN	SAMD12	sterile alpha motif domain containing 12 [Source:VGNC Symbol;Acc:VGNC:92565]	100738445
ENSSSCG00000025858	244.383	-0.713104	0.206817	-3.448	0.000564757	0.0187799	DOWN	ELN	elastin [Source:VGNC Symbol;Acc:VGNC:87655]	100628118
ENSSSCG00000012126	159.547	-0.717882	0.170117	-4.21993	2.44373e-05	0.00178702	DOWN	GPM6B	glycoprotein M6B [Source:VGNC Symbol;Acc:VGNC:103953]	100155237
ENSSSCG00000001423	2364.16	-0.72364	0.162627	-4.44968	8.59964e-06	0.000798729	DOWN	NELFE	negative elongation factor complex member E [Source:VGNC Symbol;Acc:VGNC:90682]	100124384
ENSSSCG00000040556	321.427	-0.727925	0.223438	-3.25785	0.00112262	0.0309073	DOWN			100524201
ENSSSCG00000003222	105.04	-0.728249	0.181303	-4.01674	5.90083e-05	0.00355833	DOWN	SYT3	synaptotagmin 3 [Source:VGNC Symbol;Acc:VGNC:93684]	100511086
ENSSSCG00000008816	249.797	-0.73168	0.142547	-5.13292	2.85286e-07	4.37961e-05	DOWN	NFXL1	nuclear transcription factor, X-box binding like 1 [Source:VGNC Symbol;Acc:VGNC:90728]	100518499
ENSSSCG00000021586	95.7655	-0.732049	0.219825	-3.33015	0.000867986	0.0260251	DOWN	ZHX2	zinc fingers and homeoboxes 2 [Source:VGNC Symbol;Acc:VGNC:95165]	100152952
ENSSSCG00000000985	2971.36	-0.751383	0.171962	-4.36946	1.24552e-05	0.00108574	DOWN	EXOC2	exocyst complex component 2 [Source:VGNC Symbol;Acc:VGNC:87825]	100520314
ENSSSCG00000042718	95.1148	-0.752829	0.196391	-3.83331	0.000126429	0.00617289	DOWN	GNAT1	G protein subunit alpha transducin 1 [Source:HGNC Symbol;Acc:HGNC:4393]	100157237
ENSSSCG00000024914	3135.83	-0.765977	0.186776	-4.10106	4.11271e-05	0.00272399	DOWN		complement factor B [Source:NCBI gene (formerly Entrezgene);Acc:100124383]	100124383
ENSSSCG00000008509	581.131	-0.767611	0.210144	-3.65279	0.000259403	0.0107912	DOWN	RASGRP3	RAS guanyl releasing protein 3 [Source:VGNC Symbol;Acc:VGNC:92115]	100511446
ENSSSCG00000017951	92.4638	-0.768278	0.185817	-4.1346	3.55577e-05	0.00245569	DOWN	ATP1B2	ATPase Na+/K+ transporting subunit beta 2 [Source:VGNC Symbol;Acc:VGNC:85643]	100522212
ENSSSCG00000038081	217.085	-0.769831	0.180208	-4.27191	1.9381e-05	0.0014949	DOWN	AGPAT3	1-acylglycerol-3-phosphate O-acyltransferase 3 [Source:VGNC Symbol;Acc:VGNC:85185]	100233171
ENSSSCG00000021638	136.673	-0.772326	0.217075	-3.55788	0.000373858	0.014051	DOWN	NEU3	neuraminidase 3 [Source:VGNC Symbol;Acc:VGNC:90693]	100739223
ENSSSCG00000004233	403.291	-0.775091	0.197622	-3.92209	8.77859e-05	0.0047768	DOWN	SMPDL3A	sphingomyelin phosphodiesterase acid like 3A [Source:VGNC Symbol;Acc:VGNC:93265]	100153442
ENSSSCG00000047344	160.033	-0.77894	0.205398	-3.79234	0.000149232	0.00707252	DOWN			NA
ENSSSCG00000003894	531.92	-0.787144	0.247001	-3.1868	0.00143856	0.0362693	DOWN	CYP4B1	cytochrome P450 family 4 subfamily B member 1 [Source:VGNC Symbol;Acc:VGNC:104200]	100523909
ENSSSCG00000012258	586.874	-0.79057	0.1912	-4.13479	3.55276e-05	0.00245569	DOWN	FUNDC1	FUN14 domain containing 1 [Source:VGNC Symbol;Acc:VGNC:88264]	100518350
ENSSSCG00000015083	333.755	-0.806875	0.245888	-3.28148	0.00103264	0.0291248	DOWN			102158732
ENSSSCG00000031800	46.1223	-0.814506	0.256287	-3.1781	0.00148242	0.0370858	DOWN	CEP72	centrosomal protein 72 [Source:VGNC Symbol;Acc:VGNC:86576]	106508683
ENSSSCG00000050540	169.964	-0.819932	0.255214	-3.21273	0.00131479	0.0344382	DOWN			NA
ENSSSCG00000016717	66.4946	-0.830966	0.268138	-3.09903	0.00194156	0.0449827	DOWN	PALS2	protein associated with LIN7 2, MAGUK p55 family member [Source:VGNC Symbol;Acc:VGNC:98137]	100523707
ENSSSCG00000021598	46.7291	-0.831155	0.267797	-3.10368	0.00191133	0.0446372	DOWN	EVA1C	eva-1 homolog C [Source:VGNC Symbol;Acc:VGNC:87817]	100628171
ENSSSCG00000000649	53.4669	-0.840362	0.258884	-3.2461	0.00116999	0.0319486	DOWN	CLEC1A	C-type lectin domain family 1 member A [Source:VGNC Symbol;Acc:VGNC:86750]	100519486
ENSSSCG00000038940	354.873	-0.840951	0.157963	-5.32371	1.01674e-07	1.80566e-05	DOWN	GNPDA1	glucosamine-6-phosphate deaminase 1 [Source:VGNC Symbol;Acc:VGNC:88544]	100512094
ENSSSCG00000033913	50.0434	-0.850083	0.274871	-3.09266	0.00198372	0.0455382	DOWN	C1RL	complement C1r subcomponent like [Source:VGNC Symbol;Acc:VGNC:85988]	106507531
ENSSSCG00000026695	70.8077	-0.850794	0.236861	-3.59195	0.00032821	0.0125692	DOWN	TNFSF14	TNF superfamily member 14 [Source:VGNC Symbol;Acc:VGNC:94270]	100519468
ENSSSCG00000005203	131.68	-0.872801	0.20472	-4.26339	2.0135e-05	0.00153492	DOWN	IL33	interleukin 33 [Source:VGNC Symbol;Acc:VGNC:89106]	100518643
ENSSSCG00000006742	71.2787	-0.874417	0.222199	-3.93528	8.30985e-05	0.00455239	DOWN	MAB21L3	mab-21 like 3 [Source:VGNC Symbol;Acc:VGNC:89934]	100154970
ENSSSCG00000048556	64.5809	-0.890845	0.25387	-3.50906	0.000449685	0.0159372	DOWN			NA
ENSSSCG00000022009	330.961	-0.89137	0.16588	-5.37358	7.719e-08	1.43387e-05	DOWN	DDC	dopa decarboxylase [Source:VGNC Symbol;Acc:VGNC:87204]	396857
ENSSSCG00000012452	302.39	-0.892839	0.164562	-5.42554	5.77799e-08	1.13876e-05	DOWN		SH3 domain binding glutamate rich protein like [Source:VGNC Symbol;Acc:VGNC:92815]	100520772
ENSSSCG00000036096	410.22	-0.894712	0.261279	-3.42436	0.000616249	0.0202012	DOWN			NA
ENSSSCG00000033636	854.311	-0.908607	0.178944	-5.07761	3.82214e-07	5.71941e-05	DOWN	AFMID	arylformamidase [Source:VGNC Symbol;Acc:VGNC:97870]	110255955
ENSSSCG00000003331	65.1814	-0.908661	0.257745	-3.52543	0.000422801	0.0153894	DOWN	TNFRSF4	TNF receptor superfamily member 4 [Source:VGNC Symbol;Acc:VGNC:94267]	100524628
ENSSSCG00000003146	962.355	-0.917937	0.214474	-4.27995	1.86939e-05	0.00147372	DOWN	NTN5	netrin 5 [Source:VGNC Symbol;Acc:VGNC:90934]	100524377
ENSSSCG00000012155	66.076	-0.923232	0.250735	-3.6821	0.000231322	0.00994255	DOWN	SCML2	Scm polycomb group protein like 2 [Source:VGNC Symbol;Acc:VGNC:92628]	100519636
ENSSSCG00000045776	127.106	-0.925316	0.175124	-5.28377	1.26551e-07	2.17849e-05	DOWN			NA
ENSSSCG00000012127	111.954	-0.925769	0.229304	-4.03729	5.40716e-05	0.00334809	DOWN	GEMIN8	gem nuclear organelle associated protein 8 [Source:VGNC Symbol;Acc:VGNC:88416]	100513635
ENSSSCG00000021702	226.338	-0.92804	0.271928	-3.41281	0.00064296	0.0209493	DOWN	XRRA1	X-ray radiation resistance associated 1 [Source:VGNC Symbol;Acc:VGNC:95012]	100518139
ENSSSCG00000012394	120.939	-0.934806	0.1808	-5.1704	2.336e-07	3.73783e-05	DOWN	GJB1	gap junction protein beta 1 [Source:VGNC Symbol;Acc:VGNC:88462]	100519581
ENSSSCG00000007456	331.8	-0.942527	0.240785	-3.91438	9.06351e-05	0.00488251	DOWN	SULF2	sulfatase 2 [Source:VGNC Symbol;Acc:VGNC:95938]	100152351
ENSSSCG00000033703	1125.82	-0.973463	0.204691	-4.75576	1.97697e-06	0.000233211	DOWN	FAM111A	FAM111 trypsin like peptidase A [Source:VGNC Symbol;Acc:VGNC:87888]	100525029
ENSSSCG00000037559	117.59	-0.984355	0.297158	-3.31256	0.000924459	0.0270655	DOWN	ACOT11	acyl-CoA thioesterase 11 [Source:VGNC Symbol;Acc:VGNC:85016]	110261225
ENSSSCG00000005594	53.4275	-0.988612	0.307771	-3.21217	0.00131738	0.0344502	DOWN	WDR38	WD repeat domain 38 [Source:VGNC Symbol;Acc:VGNC:94918]	100154489
ENSSSCG00000013065	590.431	-0.995502	0.174006	-5.72107	1.05853e-08	2.55327e-06	DOWN	ASRGL1	asparaginase and isoaspartyl peptidase 1 [Source:VGNC Symbol;Acc:VGNC:85589]	100517023
ENSSSCG00000000884	422.017	-1.01055	0.241113	-4.1912	2.77483e-05	0.00195825	DOWN	APAF1	apoptotic peptidase activating factor 1 [Source:VGNC Symbol;Acc:VGNC:85398]	100513283
ENSSSCG00000004890	255.967	-1.01213	0.271429	-3.72888	0.000192329	0.00858628	DOWN	SERPINB2	serpin family B member 2 [Source:VGNC Symbol;Acc:VGNC:92737]	100519286
ENSSSCG00000036639	2402.24	-1.01596	0.213555	-4.75735	1.96148e-06	0.000233085	DOWN	STOM	stomatin [Source:VGNC Symbol;Acc:VGNC:93565]	100627513
ENSSSCG00000015540	80.8864	-1.01826	0.218055	-4.66974	3.01581e-06	0.000329314	DOWN	MR1	major histocompatibility complex, class I-related [Source:VGNC Symbol;Acc:VGNC:90338]	100511275
ENSSSCG00000021238	83.3753	-1.02194	0.272737	-3.74697	0.000178985	0.00812523	DOWN	STX1B	syntaxin 1B [Source:VGNC Symbol;Acc:VGNC:98352]	100512651
ENSSSCG00000045913	236.4	-1.02524	0.307163	-3.33777	0.000844525	0.0256067	DOWN			NA
ENSSSCG00000005627	345.938	-1.03256	0.284625	-3.62778	0.000285868	0.0114638	DOWN	AK1	adenylate kinase 1 [Source:VGNC Symbol;Acc:VGNC:97875]	100521423
ENSSSCG00000007656	96.1253	-1.05596	0.287557	-3.67216	0.000240508	0.0102017	DOWN	PVRIG	PVR related immunoglobulin domain containing [Source:VGNC Symbol;Acc:VGNC:92008]	100512708
ENSSSCG00000042162	160.681	-1.0581	0.199551	-5.30239	1.14295e-07	2.00774e-05	DOWN	KCNJ11	potassium inwardly rectifying channel subfamily J member 11 [Source:HGNC Symbol;Acc:HGNC:6257]	100158240
ENSSSCG00000038535	194.807	-1.06113	0.206783	-5.13162	2.87258e-07	4.37961e-05	DOWN	ARSB	arylsulfatase B [Source:VGNC Symbol;Acc:VGNC:96794]	102158016
ENSSSCG00000008953	458.825	-1.06352	0.288653	-3.68441	0.000229235	0.00993207	DOWN	CXCL8	C-X-C motif chemokine ligand 8 [Source:VGNC Symbol;Acc:VGNC:87106]	396880
ENSSSCG00000017565	94.2669	-1.0653	0.283755	-3.75429	0.000173831	0.00796881	DOWN	SPATA20	spermatosis associated 20 [Source:VGNC Symbol;Acc:VGNC:93380]	100286812
ENSSSCG00000011862	1101.17	-1.0653	0.213093	-4.99924	5.75581e-07	8.38015e-05	DOWN	MUC13	mucin 13, cell surface associated [Source:VGNC Symbol;Acc:VGNC:90480]	100125829
ENSSSCG00000023584	181.122	-1.08222	0.279926	-3.86608	0.000110599	0.00567426	DOWN			NA
ENSSSCG00000026108	828.955	-1.09413	0.240816	-4.54341	5.53503e-06	0.000545437	DOWN	CDC42EP1	CDC42 effector protein 1 [Source:VGNC Symbol;Acc:VGNC:86455]	100738372
ENSSSCG00000007717	60.4106	-1.0973	0.257197	-4.26637	1.98679e-05	0.00152173	DOWN	METTL27	methyltransferase like 27 [Source:VGNC Symbol;Acc:VGNC:98126]	100526161
ENSSSCG00000023320	177.618	-1.10092	0.318979	-3.4514	0.000557682	0.0185954	DOWN	CYP3A29	cytochrome P450 family 3 subfamily A member 22 [Source:NCBI gene (formerly Entrezgene);Acc:100144468]	100144468
ENSSSCG00000016443	567.133	-1.10583	0.193024	-5.72896	1.01047e-08	2.47427e-06	DOWN	TMEM176A	transmembrane protein 176A [Source:VGNC Symbol;Acc:VGNC:94112]	100523103
ENSSSCG00000012300	54.4208	-1.11217	0.294159	-3.78084	0.000156301	0.0073217	DOWN	FOXP3	forkhead box P3 [Source:VGNC Symbol;Acc:VGNC:88223]	444998
ENSSSCG00000039102	366.823	-1.11893	0.30288	-3.6943	0.00022049	0.00963065	DOWN			NA
ENSSSCG00000011851	49.5254	-1.11983	0.340708	-3.28677	0.00101342	0.0288344	DOWN		mucin 20, cell surface associated [Source:VGNC Symbol;Acc:VGNC:90482]	NA
ENSSSCG00000010960	79.978	-1.14548	0.354205	-3.23395	0.00122091	0.0328693	DOWN	SLC28A3	solute carrier family 28 member 3 [Source:VGNC Symbol;Acc:VGNC:95810]	100621750
ENSSSCG00000005284	179.597	-1.1594	0.173607	-6.67831	2.41709e-11	1.13959e-08	DOWN	GNA14	G protein subunit alpha 14 [Source:VGNC Symbol;Acc:VGNC:88519]	100048958
ENSSSCG00000022630	107.102	-1.16824	0.310378	-3.76393	0.000167263	0.00774539	DOWN	FLYWCH2	FLYWCH family member 2 [Source:VGNC Symbol;Acc:VGNC:88166]	100627929
ENSSSCG00000011850	554.253	-1.18	0.185703	-6.35425	2.09441e-10	7.69266e-08	DOWN		mucin 4, cell surface associated [Source:NCBI gene (formerly Entrezgene);Acc:100157344]	100157344
ENSSSCG00000005688	107.212	-1.18187	0.304922	-3.87598	0.000106198	0.0054833	DOWN	PTGES	prostaglandin E synthase [Source:VGNC Symbol;Acc:VGNC:91950]	654407
ENSSSCG00000035249	168.266	-1.18524	0.327988	-3.61366	0.000301903	0.0119001	DOWN	GADD45G	growth arrest and DNA damage inducible gamma [Source:VGNC Symbol;Acc:VGNC:88318]	100152997
ENSSSCG00000032734	209.311	-1.20003	0.280887	-4.27226	1.93498e-05	0.0014949	DOWN	VOPP1	VOPP1 WW domain binding protein [Source:VGNC Symbol;Acc:VGNC:94835]	110257626
ENSSSCG00000038057	59.7689	-1.20846	0.375197	-3.22087	0.00127804	0.0338597	DOWN	TAC4	tachykinin 4 [Source:VGNC Symbol;Acc:VGNC:96765]	100511101
ENSSSCG00000014314	35.7562	-1.2156	0.335527	-3.62296	0.000291251	0.0115934	DOWN			100517085
ENSSSCG00000034634	438.43	-1.22193	0.294635	-4.14728	3.36449e-05	0.00235014	DOWN	ssc-mir-6782	ssc-mir-6782 [Source:miRBase;Acc:MI0031620]	104797534
ENSSSCG00000001705	24.1759	-1.2401	0.350557	-3.5375	0.000403927	0.0148698	DOWN	TCTE1	t-complex-associated-testis-expressed 1 [Source:VGNC Symbol;Acc:VGNC:93836]	100156326
ENSSSCG00000031398	33.4537	-1.26241	0.37772	-3.34218	0.00083124	0.0252513	DOWN			110257938
ENSSSCG00000043021	42.995	-1.26945	0.366687	-3.46194	0.000536293	0.0181364	DOWN			NA
ENSSSCG00000001209	29.0811	-1.2773	0.340253	-3.75396	0.00017406	0.00796881	DOWN	ZSCAN12	zinc finger and SCAN domain containing 12 [Source:VGNC Symbol;Acc:VGNC:95325]	100152126
ENSSSCG00000046512	46.8449	-1.30542	0.339053	-3.8502	0.000118021	0.00592533	DOWN			NA
ENSSSCG00000047250	54.6053	-1.30838	0.338928	-3.86034	0.000113229	0.00578957	DOWN			NA
ENSSSCG00000024678	39.2449	-1.32391	0.415895	-3.18327	0.00145622	0.0366574	DOWN	MEGF6	multiple EGF like domains 6 [Source:VGNC Symbol;Acc:VGNC:98499]	102165253
ENSSSCG00000030681	45.2228	-1.32796	0.423989	-3.13206	0.00173587	0.0418084	DOWN	MYBPH	myosin binding protein H [Source:VGNC Symbol;Acc:VGNC:98144]	613132
ENSSSCG00000004454	111.54	-1.35841	0.291478	-4.66042	3.15572e-06	0.000342279	DOWN	ME1	malic enzyme 1 [Source:VGNC Symbol;Acc:VGNC:90095]	397538
ENSSSCG00000008959	230.557	-1.35849	0.302441	-4.49173	7.0647e-06	0.000675578	DOWN	CXCL2	chemokine (C-X-C motif) ligand 2 [Source:NCBI gene (formerly Entrezgene);Acc:414904]	414904
ENSSSCG00000051287	61.0966	-1.3586	0.274979	-4.94073	7.7832e-07	0.00010482	DOWN			NA
ENSSSCG00000041951	54.071	-1.37068	0.423256	-3.23843	0.00120191	0.0324275	DOWN			NA
ENSSSCG00000025618	2687.42	-1.37298	0.332627	-4.12769	3.66421e-05	0.00247842	DOWN	TAP1	transporter 1, ATP binding cassette subfamily B member [Source:VGNC Symbol;Acc:VGNC:98358]	733649
ENSSSCG00000016579	23.6916	-1.37773	0.380277	-3.62297	0.00029124	0.0115934	DOWN	CCDC136	coiled-coil domain containing 136 [Source:VGNC Symbol;Acc:VGNC:86257]	100519523
ENSSSCG00000032525	91.3922	-1.38179	0.342379	-4.03584	5.4407e-05	0.003356	DOWN			NA
ENSSSCG00000028501	46.2845	-1.40852	0.366239	-3.84591	0.000120105	0.00599081	DOWN		aldehyde dehydrogenase 3 family member B1 [Source:NCBI gene (formerly Entrezgene);Acc:100739347]	100739347
ENSSSCG00000029291	65.0684	-1.41697	0.293813	-4.82269	1.41637e-06	0.000177441	DOWN			100524712
ENSSSCG00000016400	30.3184	-1.42592	0.456395	-3.12432	0.00178217	0.0426581	DOWN		mab-21 like 4 [Source:VGNC Symbol;Acc:VGNC:96120]	100517432
ENSSSCG00000031724	98.7837	-1.42959	0.290019	-4.9293	8.25255e-07	0.000110223	DOWN	LYNX1	Ly6/neurotoxin 1 [Source:VGNC Symbol;Acc:VGNC:108096]	110260197
ENSSSCG00000025578	146.114	-1.43418	0.170696	-8.40196	4.39082e-17	7.096e-14	DOWN	ALDH1A2	aldehyde dehydrogenase 1 family member A2 [Source:VGNC Symbol;Acc:VGNC:97878]	100737077
ENSSSCG00000040648	83.8098	-1.43468	0.278622	-5.14922	2.61577e-07	4.10422e-05	DOWN	CCL8	chemokine (C-C motif) ligand 8 [Source:NCBI gene (formerly Entrezgene);Acc:100302703]	100302703
ENSSSCG00000039146	2824.15	-1.43681	0.431679	-3.32842	0.000873399	0.0261389	DOWN			NA
ENSSSCG00000047522	17.2572	-1.44475	0.461598	-3.12988	0.00174875	0.0419935	DOWN			110257033
ENSSSCG00000027855	322.027	-1.44484	0.442824	-3.26278	0.00110326	0.0305828	DOWN	SOCS1	suppressor of cytokine signaling 1 [Source:VGNC Symbol;Acc:VGNC:93330]	100307052
ENSSSCG00000051023	61.4704	-1.45281	0.413171	-3.51624	0.000437701	0.0156824	DOWN			NA
ENSSSCG00000012490	20.9076	-1.51033	0.487536	-3.09788	0.0019491	0.0449991	DOWN	TMEM35A	transmembrane protein 35A [Source:VGNC Symbol;Acc:VGNC:94172]	100516714
ENSSSCG00000043013	47.4261	-1.52619	0.298714	-5.1092	3.23519e-07	4.88635e-05	DOWN			NA
ENSSSCG00000037269	15.135	-1.54884	0.505963	-3.06116	0.00220479	0.0493512	DOWN	LANCL3	LanC like 3 [Source:VGNC Symbol;Acc:VGNC:89634]	100626898
ENSSSCG00000032652	209.858	-1.55005	0.289735	-5.34989	8.80084e-08	1.59809e-05	DOWN			100625890
ENSSSCG00000034976	1013.13	-1.57298	0.176063	-8.9342	4.1014e-19	1.10471e-15	DOWN			100624700
ENSSSCG00000033780	40.0772	-1.57881	0.339839	-4.64577	3.38811e-06	0.000360232	DOWN	B4GALNT4	beta-1,4-N-acetyl-galactosaminyltransferase 4 [Source:VGNC Symbol;Acc:VGNC:85732]	100623649
ENSSSCG00000027465	15.109	-1.6031	0.507179	-3.16082	0.00157326	0.0388175	DOWN	NLGN3	neuroligin 3 [Source:VGNC Symbol;Acc:VGNC:90778]	106504062
ENSSSCG00000037174	30.5057	-1.60888	0.407385	-3.94929	7.83843e-05	0.00441383	DOWN	ASMTL	acetylserotonin O-methyltransferase like [Source:VGNC Symbol;Acc:VGNC:85581]	110258198
ENSSSCG00000000978	115.17	-1.60946	0.225245	-7.14537	8.9753e-13	5.37222e-10	DOWN	MLC1	modulator of VRAC current 1 [Source:VGNC Symbol;Acc:VGNC:90251]	100519843
ENSSSCG00000010926	57.5921	-1.62129	0.510734	-3.17443	0.00150133	0.0373276	DOWN	SYT2	synaptotagmin 2 [Source:VGNC Symbol;Acc:VGNC:95530]	100511582
ENSSSCG00000008830	98.9223	-1.69655	0.417605	-4.06258	4.85323e-05	0.00311243	DOWN	CWH43	cell wall biosis 43 C-terminal homolog [Source:VGNC Symbol;Acc:VGNC:87098]	100521324
ENSSSCG00000050408	15.9202	-1.70997	0.533263	-3.20662	0.00134304	0.0346723	DOWN	PSORS1C2	psoriasis susceptibility 1 candidate 2 [Source:NCBI gene (formerly Entrezgene);Acc:396560]	396560
ENSSSCG00000009209	79.7114	-1.73871	0.47538	-3.65751	0.000254676	0.0106904	DOWN	NAP1L5	nucleosome assembly protein 1 like 5 [Source:NCBI gene (formerly Entrezgene);Acc:100616076]	100616076
ENSSSCG00000029945	69.8238	-1.74315	0.371254	-4.69532	2.66188e-06	0.000298741	DOWN	GCAT	glycine C-acetyltransferase [Source:VGNC Symbol;Acc:VGNC:88378]	100525698
ENSSSCG00000038264	39.9091	-1.76954	0.329151	-5.37607	7.61281e-08	1.43059e-05	DOWN			110261361
ENSSSCG00000048179	45.217	-1.77617	0.412292	-4.30804	1.64706e-05	0.00131773	DOWN			NA
ENSSSCG00000049223	13.7232	-1.77793	0.50472	-3.52261	0.000427323	0.015426	DOWN			NA
ENSSSCG00000012350	26.8977	-1.8071	0.365746	-4.94086	7.77768e-07	0.00010482	DOWN	MAGEH1	MAGE family member H1 [Source:VGNC Symbol;Acc:VGNC:89953]	100519347
ENSSSCG00000017717	86.1887	-1.85127	0.42604	-4.3453	1.39085e-05	0.0011707	DOWN	UNC45B	unc-45 myosin chaperone B [Source:VGNC Symbol;Acc:VGNC:94705]	100134956
ENSSSCG00000025013	23.8411	-1.86282	0.565361	-3.29492	0.000984497	0.0281104	DOWN	RTN1	reticulon 1 [Source:VGNC Symbol;Acc:VGNC:103169]	100152394
ENSSSCG00000042664	12.5868	-1.91844	0.618954	-3.09948	0.00193858	0.0449827	DOWN			NA
ENSSSCG00000000647	66.9617	-1.94341	0.304344	-6.38558	1.70753e-10	6.41754e-08	DOWN	OLR1	oxidized low density lipoprotein receptor 1 [Source:VGNC Symbol;Acc:VGNC:91038]	396724
ENSSSCG00000035893	20.0823	-1.94378	0.470824	-4.12847	3.65186e-05	0.00247842	DOWN			102167302
ENSSSCG00000044574	1737.8	-1.9817	0.243368	-8.14283	3.86136e-16	4.80027e-13	DOWN			NA
ENSSSCG00000026079	21.3448	-2.01674	0.608591	-3.31378	0.000920439	0.0270459	DOWN	TKTL2	transketolase like 2 [Source:VGNC Symbol;Acc:VGNC:98968]	NA
ENSSSCG00000044522	22.2731	-2.03629	0.650438	-3.13065	0.00174419	0.0419463	DOWN			NA
ENSSSCG00000006762	654.546	-2.0496	0.41058	-4.99197	5.97678e-07	8.54786e-05	DOWN	AP4B1	adaptor related protein complex 4 subunit beta 1 [Source:VGNC Symbol;Acc:VGNC:85391]	100516855
ENSSSCG00000016900	45.5709	-2.07784	0.433729	-4.79063	1.66258e-06	0.000202022	DOWN	ESM1	endothelial cell specific molecule 1 [Source:VGNC Symbol;Acc:VGNC:87789]	100739671
ENSSSCG00000022568	13.9442	-2.10486	0.523749	-4.01883	5.84881e-05	0.00354018	DOWN	TMPRSS3	transmembrane serine protease 3 [Source:VGNC Symbol;Acc:VGNC:94235]	100627826
ENSSSCG00000049112	7.45801	-2.11273	0.6597	-3.20256	0.00136211	0.0349415	DOWN			NA
ENSSSCG00000004928	42.9834	-2.13297	0.498681	-4.27722	1.89238e-05	0.0014846	DOWN	CILP	cartilage intermediate layer protein [Source:VGNC Symbol;Acc:VGNC:86703]	397672
ENSSSCG00000045115	14.9554	-2.16327	0.540941	-3.99908	6.35892e-05	0.00379212	DOWN			NA
ENSSSCG00000039938	23.0532	-2.20053	0.658205	-3.34323	0.0008281	0.0252032	DOWN			NA
ENSSSCG00000016601	110.293	-2.2067	0.315872	-6.98608	2.8268e-12	1.52279e-09	DOWN	SPAM1	sperm adhesion molecule 1 [Source:VGNC Symbol;Acc:VGNC:93375]	397074
ENSSSCG00000048502	13.7403	-2.21872	0.694434	-3.195	0.0013983	0.0354982	DOWN			NA
ENSSSCG00000033452	18.5543	-2.24478	0.625444	-3.5891	0.000331828	0.0126621	DOWN			110259164
ENSSSCG00000041466	15.9072	-2.28065	0.681486	-3.34659	0.000818117	0.0249936	DOWN			NA
ENSSSCG00000011827	58.7088	-2.42649	0.363505	-6.67526	2.46801e-11	1.13959e-08	DOWN	LSG1	large 60S subunit nuclear export GTPase 1 [Source:VGNC Symbol;Acc:VGNC:89869]	100155750
ENSSSCG00000034220	39.6647	-2.55719	0.461245	-5.5441	2.95462e-08	6.63189e-06	DOWN			110258440
ENSSSCG00000002501	19.6367	-2.57153	0.500727	-5.13559	2.81263e-07	4.37067e-05	DOWN	BDKRB1	bradykinin receptor B1 [Source:NCBI gene (formerly Entrezgene);Acc:100127469]	100127469
ENSSSCG00000050640	37.6128	-2.58719	0.342443	-7.55509	4.18578e-14	3.56033e-11	DOWN			NA
ENSSSCG00000022258	997.222	-2.68658	0.727423	-3.69328	0.000221379	0.00964341	DOWN			100512873
ENSSSCG00000043182	12.85	-2.72077	0.592956	-4.58849	4.46471e-06	0.00045765	DOWN			NA
ENSSSCG00000011937	9.21116	-2.77235	0.884655	-3.13382	0.00172548	0.0416824	DOWN	MORC1	MORC family CW-type zinc finger 1 [Source:VGNC Symbol;Acc:VGNC:90302]	100620480
ENSSSCG00000049086	21.7873	-2.78205	0.508465	-5.47147	4.46309e-08	9.36727e-06	DOWN			NA
ENSSSCG00000048604	6.08719	-2.78379	0.896103	-3.10655	0.00189282	0.044475	DOWN			NA
ENSSSCG00000039977	7.01735	-3.0202	0.826552	-3.65398	0.00025821	0.0107828	DOWN			102160142
ENSSSCG00000042459	13.8138	-3.15097	0.608951	-5.17443	2.28606e-07	3.6945e-05	DOWN			NA
ENSSSCG00000032588	9.08617	-3.18512	0.734626	-4.33571	1.45293e-05	0.00119532	DOWN	C3orf85	chromosome 3 open reading frame 85 [Source:HGNC Symbol;Acc:HGNC:53432]	NA
ENSSSCG00000041512	15.0104	-3.39774	0.730085	-4.65389	3.25727e-06	0.000350938	DOWN			NA
ENSSSCG00000030874	7.54245	-3.4344	1.05871	-3.24396	0.00117879	0.032103	DOWN			106504368
ENSSSCG00000036036	6.12269	-3.47026	1.00326	-3.45898	0.000542218	0.0182112	DOWN	XG	Xg glycoprotein (Xg blood group) [Source:HGNC Symbol;Acc:HGNC:12806]	NA
ENSSSCG00000023162	30.8681	-3.70185	0.732187	-5.05589	4.28395e-07	6.35164e-05	DOWN	CDH3	cadherin 3 [Source:VGNC Symbol;Acc:VGNC:96941]	100187727
ENSSSCG00000013714	4.33539	-3.9955	1.21257	-3.29506	0.000984021	0.0281104	DOWN			NA
ENSSSCG00000017044	4.85177	-4.16675	1.2564	-3.31642	0.000911791	0.026988	DOWN	IL12B	interleukin 12B [Source:VGNC Symbol;Acc:VGNC:89079]	397076
ENSSSCG00000049063	12.7333	-4.20058	0.863186	-4.86637	1.13666e-06	0.00014579	DOWN			NA
ENSSSCG00000031524	16.781	-4.69245	0.888582	-5.28084	1.28596e-07	2.18762e-05	DOWN	DPPA2	developmental pluripotency associated 2 [Source:HGNC Symbol;Acc:HGNC:19197]	100620381
ENSSSCG00000044752	4.73135	-4.87545	1.27973	-3.80976	0.000139103	0.00669059	DOWN			NA
ENSSSCG00000038275	284.267	-5.23739	0.810942	-6.4584	1.05813e-10	4.38473e-08	DOWN			100518860
ENSSSCG00000041254	3.64176	-5.26431	1.3907	-3.78537	0.000153478	0.00721713	DOWN			NA
ENSSSCG00000040009	55.1372	-5.27866	0.983194	-5.36889	7.92233e-08	1.45492e-05	DOWN			NA
ENSSSCG00000034371	112.9	-5.87474	1.29713	-4.52905	5.92503e-06	0.00058033	DOWN			NA
ENSSSCG00000012517	16.5017	-6.70781	1.10986	-6.04386	1.50473e-09	4.42143e-07	DOWN			100525848

## Sheet: DANvsDLYN 
Supplement Table S3: Differential Gene Expression data for DAN vs. DLYN
ensembl_gene_id	baseMean	log2FoldChange	lfcSE	stat	pvalue	FDR	change	external_gene_name	description	entrezgene_id
ENSSSCG00000037509	165.91	24.3672	3.38359	7.20159	5.95156e-13	1.42923e-09	UP		eukaryotic translation initiation factor 1A, Y-linked [Source:NCBI gene (formerly Entrezgene);Acc:100625415]	100625415
ENSSSCG00000026430	244.89	23.922	3.38352	7.07015	1.54764e-12	3.25197e-09	UP			100624590
ENSSSCG00000027046	185.929	23.6631	3.38356	6.99356	2.68003e-12	5.0057e-09	UP			100625207
ENSSSCG00000012178	424.52	10.6147	3.11586	3.40665	0.000657643	0.0426833	UP			100624149
ENSSSCG00000033734	369.562	10.4016	2.53938	4.09613	4.20107e-05	0.00748696	UP			110257905
ENSSSCG00000013344	212.675	7.10384	1.83515	3.87098	0.0001084	0.0131094	UP	ANO5	anoctamin 5 [Source:VGNC Symbol;Acc:VGNC:85358]	100520542
ENSSSCG00000010610	5.2458	5.76247	1.2337	4.67088	2.99914e-06	0.00100831	UP			NA
ENSSSCG00000029771	7.97237	5.61229	1.17743	4.76655	1.8741e-06	0.000700079	UP			414736
ENSSSCG00000029879	47.428	5.43661	1.25008	4.34899	1.36765e-05	0.00338091	UP	LTF	lactotransferrin [Source:VGNC Symbol;Acc:VGNC:89891]	397649
ENSSSCG00000035337	49.2487	4.84103	1.42711	3.3922	0.000693344	0.0441482	UP			110255206
ENSSSCG00000016533	11.777	4.41283	0.928839	4.75091	2.02504e-06	0.000740021	UP	STRA8	stimulated by retinoic acid 8 [Source:VGNC Symbol;Acc:VGNC:93574]	100525138
ENSSSCG00000010334	240.263	4.09084	0.283577	14.4259	3.55825e-47	2.99071e-43	UP	SFTPD	surfactant protein D [Source:VGNC Symbol;Acc:VGNC:92782]	397198
ENSSSCG00000039778	70.8326	3.92799	0.988211	3.97485	7.04228e-05	0.0100101	UP			100525472
ENSSSCG00000027118	75.6678	3.79369	0.433305	8.75524	2.03671e-18	6.84743e-15	UP			100525318
ENSSSCG00000012530	5.61518	3.73645	1.10286	3.38795	0.00070416	0.0446677	UP		transcription elongation factor A like 2 [Source:NCBI gene (formerly Entrezgene);Acc:100153499]	100153499
ENSSSCG00000037524	7.34778	3.71187	0.99215	3.74124	0.000183112	0.017896	UP	LY6D	lymphocyte antigen 6 family member D [Source:VGNC Symbol;Acc:VGNC:89900]	100623615
ENSSSCG00000032557	170.981	3.63019	0.238371	15.2292	2.2642e-52	3.80612e-48	UP	LDHB	lactate dehydrogenase B [Source:NCBI gene (formerly Entrezgene);Acc:100621540]	100621540
ENSSSCG00000002479	399.756	3.53384	0.80632	4.38267	1.17232e-05	0.00298587	UP	SERPINA11	serpin family A member 11 [Source:VGNC Symbol;Acc:VGNC:92733]	100155953
ENSSSCG00000039103	13.7098	3.29151	0.843339	3.90295	9.5028e-05	0.0121017	UP	ADIPOQ	adiponectin, C1Q and collagen domain containing [Source:VGNC Symbol;Acc:VGNC:85140]	397660
ENSSSCG00000028758	149.797	3.10012	0.768092	4.03613	5.43408e-05	0.00904424	UP	LBP	lipopolysaccharide binding protein [Source:VGNC Symbol;Acc:VGNC:96403]	397303
ENSSSCG00000028695	16.3813	3.09299	0.602542	5.13324	2.84797e-07	0.000159581	UP			100522845
ENSSSCG00000012367	12.8962	3.03122	0.762285	3.9765	6.99382e-05	0.0100101	UP	ZC3H12B	zinc finger CCCH-type containing 12B [Source:VGNC Symbol;Acc:VGNC:95090]	100623018
ENSSSCG00000000207	214.39	3.01403	0.722635	4.17089	3.03413e-05	0.00578851	UP			NA
ENSSSCG00000037850	22.1604	2.80569	0.673052	4.1686	3.06471e-05	0.00578851	UP			NA
ENSSSCG00000016215	57.3152	2.45566	0.333923	7.35397	1.92406e-13	5.39056e-10	UP			100158003
ENSSSCG00000017932	283.85	2.43812	0.57331	4.25271	2.11198e-05	0.00449397	UP	ASGR2	asialoglycoprotein receptor 2 [Source:VGNC Symbol;Acc:VGNC:85576]	100739379
ENSSSCG00000034698	22.551	2.39764	0.624542	3.83904	0.000123518	0.0138487	UP			NA
ENSSSCG00000044784	1813.76	2.32113	0.186975	12.4141	2.19144e-35	9.20953e-32	UP			110260191
ENSSSCG00000046006	10.0157	2.32001	0.654389	3.54531	0.000392145	0.0305183	UP			NA
ENSSSCG00000032423	41.7846	2.31221	0.598938	3.86052	0.000113146	0.0133933	UP	SPOCK1	SPARC (osteonectin), cwcv and kazal like domains proteoglycan 1 [Source:VGNC Symbol;Acc:VGNC:96619]	100620623
ENSSSCG00000049264	14.5262	2.22625	0.624404	3.5654	0.000363296	0.0287358	UP			NA
ENSSSCG00000034961	11.0679	2.2019	0.634505	3.47026	0.000519952	0.0359687	UP			NA
ENSSSCG00000000983	34.3143	2.13039	0.540121	3.94429	8.00371e-05	0.0108502	UP	IL17REL	interleukin 17 receptor E like [Source:VGNC Symbol;Acc:VGNC:89088]	100520842
ENSSSCG00000030026	117.005	2.06624	0.342108	6.03973	1.54371e-09	1.85356e-06	UP	SORCS1	sortilin related VPS10 domain containing receptor 1 [Source:VGNC Symbol;Acc:VGNC:93339]	100155686
ENSSSCG00000006160	25.6039	1.97072	0.559722	3.52088	0.000430109	0.031904	UP	STMN2	stathmin 2 [Source:VGNC Symbol;Acc:VGNC:93561]	100156768
ENSSSCG00000008702	35.6182	1.84657	0.492901	3.74634	0.000179436	0.017848	UP	DOK7	docking protein 7 [Source:VGNC Symbol;Acc:VGNC:87405]	100736823
ENSSSCG00000002504	20.2615	1.79515	0.48811	3.67775	0.0002353	0.0213805	UP	AK7	adenylate kinase 7 [Source:VGNC Symbol;Acc:VGNC:85212]	100152573
ENSSSCG00000009648	62.9813	1.70325	0.482398	3.53081	0.000414297	0.0312865	UP			100625407
ENSSSCG00000014987	74.3847	1.65164	0.459593	3.5937	0.000326015	0.0266035	UP	MMP12	matrix metallopeptidase 12 [Source:VGNC Symbol;Acc:VGNC:90268]	100101475
ENSSSCG00000039244	491.285	1.63341	0.43906	3.72023	0.000199038	0.0187531	UP	PHYH	phytanoyl-CoA 2-hydroxylase [Source:VGNC Symbol;Acc:VGNC:96483]	100134962
ENSSSCG00000009950	58.2284	1.55543	0.325118	4.78421	1.71657e-06	0.000687037	UP		piwi like RNA-mediated silencing 3 [Source:VGNC Symbol;Acc:VGNC:98199]	100736714
ENSSSCG00000034821	45.1918	1.5258	0.311964	4.89095	1.00353e-06	0.00044393	UP	ARMCX4	armadillo repeat containing X-linked 4 [Source:HGNC Symbol;Acc:HGNC:28615]	110257665
ENSSSCG00000042108	37.6212	1.49459	0.358193	4.17259	3.01152e-05	0.00578851	UP			NA
ENSSSCG00000023915	31.7823	1.48623	0.397612	3.7379	0.000185567	0.0180311	UP	SLC2A4	solute carrier family 2 member 4 [Source:VGNC Symbol;Acc:VGNC:93049]	396754
ENSSSCG00000039476	52.0969	1.43904	0.293735	4.89912	9.6267e-07	0.000437364	UP			102159510
ENSSSCG00000001073	178.87	1.33921	0.207038	6.46844	9.90229e-11	1.66457e-07	UP	TPMT	thiopurine S-methyltransferase [Source:VGNC Symbol;Acc:VGNC:94340]	100157630
ENSSSCG00000005199	58.844	1.2821	0.301075	4.25839	2.05903e-05	0.00443747	UP	GLDC	glycine decarboxylase [Source:VGNC Symbol;Acc:VGNC:88478]	100155425
ENSSSCG00000037697	104.367	1.27914	0.361327	3.54012	0.000399942	0.0307195	UP	MGP	matrix Gla protein [Source:VGNC Symbol;Acc:VGNC:90201]	397206
ENSSSCG00000025270	112.696	1.25937	0.317292	3.96911	7.21411e-05	0.0100222	UP	CHRD	chordin [Source:VGNC Symbol;Acc:VGNC:86661]	100620350
ENSSSCG00000012386	186.997	1.20135	0.227044	5.29128	1.21464e-07	7.29217e-05	UP	NALF2	NALCN channel auxiliary factor 2 [Source:VGNC Symbol;Acc:VGNC:87911]	100518049
ENSSSCG00000015595	251.556	1.17406	0.333441	3.52103	0.000429873	0.031904	UP	ATF3	activating transcription factor 3 [Source:VGNC Symbol;Acc:VGNC:85606]	100738612
ENSSSCG00000001989	233.199	1.14892	0.272439	4.21719	2.47371e-05	0.00488428	UP	CIDEB	cell death inducing DFFA like effector b [Source:VGNC Symbol;Acc:VGNC:86699]	100127160
ENSSSCG00000032320	184.616	1.13131	0.201638	5.61061	2.0162e-08	1.54056e-05	UP	TCIM	transcriptional and immune response regulator [Source:VGNC Symbol;Acc:VGNC:95587]	100628052
ENSSSCG00000017507	743.314	1.10488	0.203898	5.4188	6.00012e-08	3.87931e-05	UP			100517731
ENSSSCG00000037137	53.2662	1.0868	0.310385	3.50145	0.000462735	0.0331003	UP			NA
ENSSSCG00000033260	56.5881	1.08177	0.269816	4.00928	6.09052e-05	0.00947978	UP	TNNI2	troponin I2, fast skeletal type [Source:VGNC Symbol;Acc:VGNC:94283]	606751
ENSSSCG00000034441	70.6343	1.02618	0.283131	3.62439	0.000289648	0.0245909	UP	MRGPRF	MAS related GPR family member F [Source:VGNC Symbol;Acc:VGNC:100172]	110259229
ENSSSCG00000003616	69.5029	1.01068	0.285507	3.53994	0.000400213	0.0307195	UP	FAM167B	family with sequence similarity 167 member B [Source:VGNC Symbol;Acc:VGNC:87925]	100519719
ENSSSCG00000000887	333.389	1.00007	0.235977	4.238	2.25524e-05	0.00469084	UP			100622780
ENSSSCG00000014310	3683.85	0.998597	0.158344	6.30649	2.85431e-10	3.99841e-07	UP	CXCL14	C-X-C motif chemokine ligand 14 [Source:VGNC Symbol;Acc:VGNC:87105]	494467
ENSSSCG00000002464	93.0218	0.991419	0.284805	3.48104	0.000499468	0.0348384	UP			102167492
ENSSSCG00000000668	558.445	0.979841	0.292537	3.34946	0.000809681	0.0489595	UP	APOBEC1	apolipoprotein B mRNA editing enzyme catalytic subunit 1 [Source:VGNC Symbol;Acc:VGNC:85418]	100512412
ENSSSCG00000005278	116.61	0.977648	0.256125	3.81708	0.000135041	0.0146454	UP			NA
ENSSSCG00000029843	191.701	0.962548	0.243309	3.95607	7.61935e-05	0.0104131	UP	NPHP4	nephrocystin 4 [Source:HGNC Symbol;Acc:HGNC:19104]	NA
ENSSSCG00000036387	79.588	0.961772	0.240533	3.9985	6.37444e-05	0.00964934	UP	ATPSCKMT	ATP synthase c subunit lysine N-methyltransferase [Source:VGNC Symbol;Acc:VGNC:85683]	110257273
ENSSSCG00000016793	370.057	0.95858	0.161977	5.918	3.25876e-09	3.42374e-06	UP	ZNF622	zinc finger protein 622 [Source:VGNC Symbol;Acc:VGNC:95277]	100521757
ENSSSCG00000033993	171.536	0.956765	0.255529	3.74425	0.000180931	0.0178908	UP	PLCXD3	phosphatidylinositol specific phospholipase C X domain containing 3 [Source:VGNC Symbol;Acc:VGNC:91524]	100522405
ENSSSCG00000040631	491.486	0.928352	0.238945	3.88521	0.000102243	0.0127094	UP	LPL	lipoprotein lipase [Source:VGNC Symbol;Acc:VGNC:89795]	397537
ENSSSCG00000013408	241.478	0.917538	0.179294	5.11752	3.09586e-07	0.000162284	UP	ADM	adrenomedullin [Source:VGNC Symbol;Acc:VGNC:85144]	397195
ENSSSCG00000017208	230.477	0.900345	0.212471	4.23749	2.26031e-05	0.00469084	UP	SLC25A19	solute carrier family 25 member 19 [Source:VGNC Symbol;Acc:VGNC:92997]	100302700
ENSSSCG00000010554	4570.97	0.899792	0.228639	3.93542	8.30504e-05	0.01108	UP	SCD	stearoyl-CoA desaturase [Source:NCBI gene (formerly Entrezgene);Acc:396670]	396670
ENSSSCG00000024018	146.292	0.895345	0.225336	3.97337	7.08627e-05	0.0100101	UP	SLC16A3	solute carrier family 16 member 3 [Source:VGNC Symbol;Acc:VGNC:92943]	100158243
ENSSSCG00000040849	175.616	0.887505	0.257766	3.44306	0.000575164	0.0386741	UP			NA
ENSSSCG00000023298	896.924	0.882104	0.15503	5.68989	1.27124e-08	1.01759e-05	UP	SRXN1	sulfiredoxin 1 [Source:VGNC Symbol;Acc:VGNC:95751]	100517736
ENSSSCG00000011133	333.03	0.868706	0.23808	3.6488	0.000263465	0.0231877	UP	PFKFB3	6-phosphofructo-2-kinase/fructose-2,6-biphosphatase 3 [Source:VGNC Symbol;Acc:VGNC:96480]	100516289
ENSSSCG00000031518	420.536	0.868578	0.217342	3.99637	6.43201e-05	0.00964934	UP	STARD4	StAR related lipid transfer domain containing 4 [Source:VGNC Symbol;Acc:VGNC:93534]	100233203
ENSSSCG00000016397	90.8838	0.865625	0.217639	3.97735	6.96885e-05	0.0100101	UP	NEB	nebulin [Source:VGNC Symbol;Acc:VGNC:96437]	100515976
ENSSSCG00000036956	948.481	0.855504	0.22067	3.87686	0.000105814	0.0128894	UP	SOCS3	suppressor of cytokine signaling 3 [Source:VGNC Symbol;Acc:VGNC:99052]	493186
ENSSSCG00000010772	139.072	0.854063	0.217637	3.92426	8.6998e-05	0.0114489	UP	ADAM8	ADAM metallopeptidase domain 8 [Source:VGNC Symbol;Acc:VGNC:97866]	100156146
ENSSSCG00000010966	953.523	0.838737	0.249119	3.36681	0.000760425	0.0468232	UP	CCL19	C-C motif chemokine ligand 19 [Source:VGNC Symbol;Acc:VGNC:95483]	494464
ENSSSCG00000007753	278.667	0.832065	0.217716	3.82179	0.000132486	0.0144617	UP	RUSF1	RUS family member 1 [Source:VGNC Symbol;Acc:VGNC:86014]	102165338
ENSSSCG00000028512	2330.81	0.829507	0.164895	5.03051	4.89186e-07	0.000241859	UP	LDLR	low density lipoprotein receptor [Source:VGNC Symbol;Acc:VGNC:89671]	396801
ENSSSCG00000024058	123.094	0.829111	0.245721	3.3742	0.000740316	0.0462629	UP	SLC5A2	solute carrier family 5 member 2 [Source:VGNC Symbol;Acc:VGNC:93143]	100286743
ENSSSCG00000009239	359.901	0.812252	0.211879	3.83357	0.000126295	0.0140043	UP			100524999
ENSSSCG00000022099	1159.49	0.804848	0.202545	3.97367	7.07739e-05	0.0100101	UP	TP53INP2	tumor protein p53 inducible nuclear protein 2 [Source:VGNC Symbol;Acc:VGNC:95737]	100152247
ENSSSCG00000028517	446.874	0.800787	0.214351	3.73587	0.000187064	0.0180721	UP	SC5D	sterol-C5-desaturase [Source:VGNC Symbol;Acc:VGNC:92600]	100520925
ENSSSCG00000029066	1217.08	0.797719	0.174479	4.57202	4.83044e-06	0.00147636	UP	IDI1	isopentenyl-diphosphate delta isomerase 1 [Source:HGNC Symbol;Acc:HGNC:5387]	100625049
ENSSSCG00000039009	165.498	0.785003	0.218062	3.59991	0.000318332	0.0264909	UP			100153374
ENSSSCG00000030165	281.069	0.774609	0.214135	3.61739	0.000297586	0.0251378	UP	MAFF	MAF bZIP transcription factor F [Source:VGNC Symbol;Acc:VGNC:89947]	100156484
ENSSSCG00000032768	511.423	0.769754	0.199567	3.85712	0.000114731	0.0133933	UP	EBP	EBP cholestenol delta-isomerase [Source:NCBI gene (formerly Entrezgene);Acc:100312968]	100312968
ENSSSCG00000024015	212.725	0.757748	0.22546	3.3609	0.000776897	0.0476629	UP	FADS1	fatty acid desaturase 1 [Source:VGNC Symbol;Acc:VGNC:87875]	444995
ENSSSCG00000016872	3868.71	0.753004	0.192338	3.91499	9.0407e-05	0.0117809	UP	HMGCS1	3-hydroxy-3-methylglutaryl-CoA synthase 1 [Source:VGNC Symbol;Acc:VGNC:88907]	100524223
ENSSSCG00000004033	189.468	0.746839	0.195867	3.81299	0.000137295	0.0147945	UP	AGPAT4	1-acylglycerol-3-phosphate O-acyltransferase 4 [Source:VGNC Symbol;Acc:VGNC:85186]	100156632
ENSSSCG00000046881	232.13	0.733518	0.209664	3.49854	0.000467809	0.0333215	UP	DPRX	divergent-paired related homeobox [Source:VGNC Symbol;Acc:VGNC:108073]	102165141
ENSSSCG00000003669	377.174	0.732823	0.209996	3.4897	0.000483562	0.0339928	UP	MFSD2A	major facilitator superfamily domain containing 2A [Source:VGNC Symbol;Acc:VGNC:90188]	100518612
ENSSSCG00000027387	3860.59	0.707763	0.202871	3.48873	0.000485322	0.0339928	UP	MS4A12	membrane spanning 4-domains A12 [Source:VGNC Symbol;Acc:VGNC:90408]	100627859
ENSSSCG00000039731	1857.49	0.690833	0.206059	3.3526	0.000800576	0.0487597	UP		glutaredoxin [Source:NCBI gene (formerly Entrezgene);Acc:397463]	397463
ENSSSCG00000024791	150.593	0.690193	0.204728	3.37127	0.000748217	0.0464649	UP		CD59 molecule [Source:VGNC Symbol;Acc:VGNC:99615]	397347
ENSSSCG00000035774	438.781	0.68221	0.180421	3.78121	0.00015607	0.0165003	UP	ERRFI1	ERBB receptor feedback inhibitor 1 [Source:VGNC Symbol;Acc:VGNC:87784]	100738544
ENSSSCG00000027205	378.779	0.662937	0.140971	4.70266	2.56797e-06	0.000899324	UP	LPCAT3	lysophosphatidylcholine acyltransferase 3 [Source:VGNC Symbol;Acc:VGNC:89790]	100627653
ENSSSCG00000010330	268.982	0.650832	0.139728	4.65786	3.19516e-06	0.00105315	UP	PPIF	peptidylprolyl isomerase F [Source:VGNC Symbol;Acc:VGNC:98213]	100152612
ENSSSCG00000015311	2408	0.642519	0.139625	4.60174	4.1897e-06	0.00132885	UP	CYP51A1	cytochrome P450 family 51 subfamily A member 1 [Source:VGNC Symbol;Acc:VGNC:103377]	403334
ENSSSCG00000028157	853.153	0.633928	0.171402	3.6985	0.000216881	0.0200317	UP	CASP8	caspase 8 [Source:VGNC Symbol;Acc:VGNC:95639]	595105
ENSSSCG00000005626	206.024	0.628727	0.167641	3.75043	0.00017653	0.0177199	UP	FPGS	folylpolyglutamate synthase [Source:VGNC Symbol;Acc:VGNC:88230]	100736908
ENSSSCG00000003707	513.047	0.624154	0.155065	4.02511	5.6948e-05	0.00935406	UP	NPC1	NPC intracellular cholesterol transporter 1 [Source:VGNC Symbol;Acc:VGNC:98521]	397591
ENSSSCG00000039488	425.33	0.623679	0.155005	4.0236	5.73152e-05	0.00935406	UP	SPON2	spondin 2 [Source:VGNC Symbol;Acc:VGNC:93416]	110262033
ENSSSCG00000040815	723.497	0.614539	0.179517	3.42329	0.000618684	0.0409452	UP	DUSP5	dual specificity phosphatase 5 [Source:VGNC Symbol;Acc:VGNC:87487]	100157144
ENSSSCG00000012326	582.442	0.610044	0.130577	4.67191	2.98405e-06	0.00100831	UP	RIBC1	RIB43A domain with coiled-coils 1 [Source:VGNC Symbol;Acc:VGNC:92297]	100739016
ENSSSCG00000017472	447.508	0.607063	0.151304	4.01222	6.01515e-05	0.00947978	UP	IGFBP4	insulin like growth factor binding protein 4 [Source:VGNC Symbol;Acc:VGNC:98045]	100144490
ENSSSCG00000029944	5215.24	0.589831	0.151251	3.89968	9.63193e-05	0.0121739	UP	FASN	fatty acid synthase [Source:VGNC Symbol;Acc:VGNC:88016]	397561
ENSSSCG00000008574	119.622	0.587437	0.175707	3.34328	0.00082795	0.0497066	UP	KIF3C	kinesin family member 3C [Source:VGNC Symbol;Acc:VGNC:89471]	102158480
ENSSSCG00000012125	207.056	-0.599462	0.176438	-3.39758	0.000679857	0.0436198	DOWN			100513249
ENSSSCG00000036553	410.176	-0.605443	0.178078	-3.39987	0.000674172	0.0434208	DOWN	SAMD12	sterile alpha motif domain containing 12 [Source:VGNC Symbol;Acc:VGNC:92565]	100738445
ENSSSCG00000015895	576.83	-0.627624	0.135178	-4.64296	3.43454e-06	0.00111028	DOWN	GCG	glucagon [Source:VGNC Symbol;Acc:VGNC:96317]	397595
ENSSSCG00000010665	226.096	-0.62895	0.168425	-3.7343	0.000188238	0.0180816	DOWN	SHTN1	shootin 1 [Source:VGNC Symbol;Acc:VGNC:92862]	100156189
ENSSSCG00000032483	172.11	-0.635794	0.189459	-3.35584	0.000791251	0.048367	DOWN			NA
ENSSSCG00000008745	324.994	-0.642273	0.149846	-4.28623	1.81734e-05	0.00396747	DOWN	PROM1	prominin 1 [Source:VGNC Symbol;Acc:VGNC:91832]	100511336
ENSSSCG00000004193	110.896	-0.6664	0.195067	-3.41627	0.000634852	0.0415052	DOWN	ENPP1	ectonucleotide pyrophosphatase/phosphodiesterase 1 [Source:VGNC Symbol;Acc:VGNC:87708]	100037271
ENSSSCG00000001396	880.112	-0.670813	0.167653	-4.0012	6.30231e-05	0.00963108	DOWN		MHC class I antigen 8 [Source:NCBI gene (formerly Entrezgene);Acc:100135036]	100135036
ENSSSCG00000029323	371.59	-0.677309	0.188406	-3.59494	0.000324466	0.0266035	DOWN	KCNE3	potassium voltage-gated channel subfamily E regulatory subunit 3 [Source:VGNC Symbol;Acc:VGNC:89337]	397168
ENSSSCG00000040569	111.112	-0.67776	0.190125	-3.56482	0.000364113	0.0287358	DOWN	PLA2G10	phospholipase A2 group X [Source:HGNC Symbol;Acc:HGNC:9029]	110259864
ENSSSCG00000010011	403.484	-0.701062	0.178072	-3.93695	8.2523e-05	0.01108	DOWN	TCN2	transcobalamin 2 [Source:VGNC Symbol;Acc:VGNC:93830]	100152846
ENSSSCG00000025578	163.317	-0.709263	0.194469	-3.64718	0.000265129	0.0232126	DOWN	ALDH1A2	aldehyde dehydrogenase 1 family member A2 [Source:VGNC Symbol;Acc:VGNC:97878]	100737077
ENSSSCG00000012425	200.216	-0.728169	0.161176	-4.51784	6.24733e-06	0.00181065	DOWN	UPRT	uracil phosphoribosyltransferase homolog [Source:VGNC Symbol;Acc:VGNC:98403]	100151798
ENSSSCG00000004569	143.651	-0.736109	0.201584	-3.65162	0.000260588	0.0231772	DOWN	LACTB	lactamase beta [Source:VGNC Symbol;Acc:VGNC:89614]	100152773
ENSSSCG00000012437	234.426	-0.736355	0.154286	-4.77266	1.81807e-06	0.000700079	DOWN	ATP7A	ATPase copper transporting alpha [Source:VGNC Symbol;Acc:VGNC:85678]	397159
ENSSSCG00000012744	92.1878	-0.738761	0.191502	-3.85772	0.000114451	0.0133933	DOWN	CD99L2	CD99 molecule like 2 [Source:VGNC Symbol;Acc:VGNC:86438]	100517448
ENSSSCG00000011023	72.321	-0.74574	0.214386	-3.4785	0.000504234	0.0350255	DOWN	ZNF438	zinc finger protein 438 [Source:HGNC Symbol;Acc:HGNC:21029]	100519167
ENSSSCG00000024325	754.345	-0.746616	0.193856	-3.8514	0.000117445	0.0135779	DOWN	SGK2	serum/glucocorticoid regulated kinase 2 [Source:VGNC Symbol;Acc:VGNC:95597]	100157757
ENSSSCG00000008604	164.871	-0.757247	0.220175	-3.43929	0.000583238	0.0389057	DOWN	WDR35	WD repeat domain 35 [Source:VGNC Symbol;Acc:VGNC:94916]	100516364
ENSSSCG00000002494	165.289	-0.772454	0.222971	-3.46437	0.000531479	0.0363177	DOWN	CLMN	calmin [Source:VGNC Symbol;Acc:VGNC:86769]	100511700
ENSSSCG00000008842	213.511	-0.776141	0.173136	-4.48285	7.36542e-06	0.00202972	DOWN	KIT	KIT proto-onco, receptor tyrosine kinase [Source:VGNC Symbol;Acc:VGNC:98060]	396810
ENSSSCG00000012238	737.274	-0.794399	0.221449	-3.58728	0.000334151	0.0270052	DOWN			100526026
ENSSSCG00000040556	285.568	-0.803736	0.194344	-4.13563	3.53977e-05	0.0066115	DOWN			100524201
ENSSSCG00000009380	241.077	-0.816517	0.182916	-4.46388	8.04873e-06	0.0021476	DOWN	NEK5	NIMA related kinase 5 [Source:VGNC Symbol;Acc:VGNC:90677]	100156672
ENSSSCG00000027230	156.906	-0.818326	0.224455	-3.64584	0.000266521	0.0232136	DOWN	SLC35G1	solute carrier family 35 member G1 [Source:VGNC Symbol;Acc:VGNC:93086]	100156133
ENSSSCG00000011850	603.836	-0.82834	0.205111	-4.03849	5.37957e-05	0.00904424	DOWN		mucin 4, cell surface associated [Source:NCBI gene (formerly Entrezgene);Acc:100157344]	100157344
ENSSSCG00000017256	194.347	-0.839137	0.187851	-4.46703	7.93141e-06	0.0021476	DOWN	ABCA6	ATP binding cassette subfamily A member 6 [Source:VGNC Symbol;Acc:VGNC:84950]	100520861
ENSSSCG00000032574	424.649	-0.846439	0.186452	-4.53972	5.63277e-06	0.00166117	DOWN	RTTN	rotatin [Source:VGNC Symbol;Acc:VGNC:92508]	100623296
ENSSSCG00000017255	303.686	-0.894919	0.21883	-4.08956	4.32186e-05	0.00756776	DOWN	ABCA5	ATP binding cassette subfamily A member 5 [Source:VGNC Symbol;Acc:VGNC:84949]	100520049
ENSSSCG00000017540	68.2387	-0.89589	0.251963	-3.55564	0.00037706	0.0296186	DOWN	HOXB5	homeobox B5 [Source:VGNC Symbol;Acc:VGNC:88945]	100522700
ENSSSCG00000007079	200.275	-0.897813	0.246005	-3.64958	0.000262673	0.0231877	DOWN	FLRT3	fibronectin leucine rich transmembrane protein 3 [Source:VGNC Symbol;Acc:VGNC:96304]	100158214
ENSSSCG00000036208	449.021	-0.900071	0.19756	-4.55594	5.21529e-06	0.00156552	DOWN	SHMT1	serine hydroxymethyltransferase 1 [Source:VGNC Symbol;Acc:VGNC:92855]	397181
ENSSSCG00000029985	134.474	-0.911079	0.245045	-3.718	0.000200806	0.0187531	DOWN	ARL10	ADP ribosylation factor like GTPase 10 [Source:VGNC Symbol;Acc:VGNC:85514]	100624464
ENSSSCG00000034607	145.002	-0.929752	0.26342	-3.52955	0.000416268	0.0312865	DOWN	OGN	osteoglycin [Source:VGNC Symbol;Acc:VGNC:91028]	106509723
ENSSSCG00000012452	401.604	-0.937665	0.265692	-3.52914	0.000416905	0.0312865	DOWN		SH3 domain binding glutamate rich protein like [Source:VGNC Symbol;Acc:VGNC:92815]	100520772
ENSSSCG00000014874	220.014	-0.938605	0.218441	-4.29684	1.73248e-05	0.00388307	DOWN	B3GNT6	UDP-GlcNAc:betaGal beta-1,3-N-acetylglucosaminyltransferase 6 [Source:HGNC Symbol;Acc:HGNC:24141]	NA
ENSSSCG00000037035	429.324	-0.943488	0.1934	-4.87842	1.06942e-06	0.000455702	DOWN	UVSSA	UV stimulated scaffold protein A [Source:VGNC Symbol;Acc:VGNC:94790]	110262039
ENSSSCG00000038487	357.244	-0.961317	0.222998	-4.31087	1.62615e-05	0.00374459	DOWN	TMPO	thymopoietin [Source:NCBI gene (formerly Entrezgene);Acc:100512350]	100512350
ENSSSCG00000010840	56.5284	-0.981838	0.263766	-3.72238	0.000197351	0.0187531	DOWN	RGS7	regulator of G protein signaling 7 [Source:VGNC Symbol;Acc:VGNC:95468]	100521858
ENSSSCG00000012394	133.727	-1.03174	0.180723	-5.70895	1.13674e-08	9.55428e-06	DOWN	GJB1	gap junction protein beta 1 [Source:VGNC Symbol;Acc:VGNC:88462]	100519581
ENSSSCG00000008311	260.557	-1.04262	0.24103	-4.32571	1.52041e-05	0.0036031	DOWN	CYP26B1	cytochrome P450 family 26 subfamily B member 1 [Source:VGNC Symbol;Acc:VGNC:103374]	100521659
ENSSSCG00000037430	188.38	-1.04384	0.271909	-3.83892	0.000123576	0.0138487	DOWN	COL6A6	collagen type VI alpha 6 chain [Source:HGNC Symbol;Acc:HGNC:27023]	100516642
ENSSSCG00000003146	901.983	-1.04401	0.254981	-4.09448	4.23118e-05	0.00748696	DOWN	NTN5	netrin 5 [Source:VGNC Symbol;Acc:VGNC:90934]	100524377
ENSSSCG00000044567	42.3718	-1.05844	0.279052	-3.79299	0.000148846	0.0158361	DOWN			NA
ENSSSCG00000038057	74.4474	-1.08627	0.236305	-4.59692	4.28781e-06	0.00133478	DOWN	TAC4	tachykinin 4 [Source:VGNC Symbol;Acc:VGNC:96765]	100511101
ENSSSCG00000043175	58.5356	-1.08954	0.301334	-3.61571	0.000299527	0.0251752	DOWN			100627892
ENSSSCG00000005627	340.924	-1.10275	0.184675	-5.97128	2.354e-09	2.63805e-06	DOWN	AK1	adenylate kinase 1 [Source:VGNC Symbol;Acc:VGNC:97875]	100521423
ENSSSCG00000038643	71.5266	-1.11777	0.276032	-4.04942	5.13443e-05	0.00880712	DOWN	KLF11	Kruppel like factor 11 [Source:VGNC Symbol;Acc:VGNC:89491]	100174954
ENSSSCG00000012380	63.3282	-1.12191	0.320359	-3.50204	0.000461704	0.0331003	DOWN	P2RY4	pyrimidinergic receptor P2Y4 [Source:VGNC Symbol;Acc:VGNC:91127]	450244
ENSSSCG00000004928	42.6321	-1.13659	0.302529	-3.75696	0.000171993	0.0175224	DOWN	CILP	cartilage intermediate layer protein [Source:VGNC Symbol;Acc:VGNC:86703]	397672
ENSSSCG00000051482	41.4526	-1.16316	0.299489	-3.88383	0.000102825	0.0127094	DOWN			NA
ENSSSCG00000016601	120.282	-1.16374	0.310044	-3.75348	0.000174399	0.0176605	DOWN	SPAM1	sperm adhesion molecule 1 [Source:VGNC Symbol;Acc:VGNC:93375]	397074
ENSSSCG00000037288	29.293	-1.16677	0.333963	-3.49372	0.000476341	0.0336441	DOWN	YPEL1	yippee like 1 [Source:VGNC Symbol;Acc:VGNC:104099]	100523752
ENSSSCG00000010046	51.2728	-1.17702	0.31457	-3.7417	0.000182782	0.017896	DOWN	GNAZ	G protein subunit alpha z [Source:VGNC Symbol;Acc:VGNC:88528]	100151867
ENSSSCG00000000884	628.094	-1.17958	0.18585	-6.34691	2.19676e-10	3.35705e-07	DOWN	APAF1	apoptotic peptidase activating factor 1 [Source:VGNC Symbol;Acc:VGNC:85398]	100513283
ENSSSCG00000008961	39.6974	-1.18422	0.35076	-3.37616	0.000735064	0.0461061	DOWN	MTHFD2L	methylenetetrahydrofolate dehydrogenase (NADP+ dependent) 2 like [Source:HGNC Symbol;Acc:HGNC:31865]	102161388
ENSSSCG00000012144	66.8747	-1.19837	0.249926	-4.79491	1.62746e-06	0.000667257	DOWN	GRPR	gastrin releasing peptide receptor [Source:VGNC Symbol;Acc:VGNC:88709]	100517439
ENSSSCG00000010660	200.606	-1.20487	0.324891	-3.70854	0.00020846	0.0193603	DOWN	PNLIPRP2	pancreatic lipase related protein 2 [Source:NCBI gene (formerly Entrezgene);Acc:100462755]	100462755
ENSSSCG00000049283	46.1579	-1.20816	0.281501	-4.29183	1.77205e-05	0.0039195	DOWN			NA
ENSSSCG00000017565	107.436	-1.2149	0.244844	-4.96194	6.97921e-07	0.00032589	DOWN	SPATA20	spermatosis associated 20 [Source:VGNC Symbol;Acc:VGNC:93380]	100286812
ENSSSCG00000038535	196.339	-1.24197	0.294662	-4.21491	2.4988e-05	0.00488428	DOWN	ARSB	arylsulfatase B [Source:VGNC Symbol;Acc:VGNC:96794]	102158016
ENSSSCG00000040272	29.4399	-1.24637	0.348876	-3.57254	0.00035354	0.0281659	DOWN	TTC29	tetratricopeptide repeat domain 29 [Source:VGNC Symbol;Acc:VGNC:94544]	100627237
ENSSSCG00000027226	190.498	-1.2879	0.272061	-4.73385	2.20304e-06	0.000787938	DOWN	EPN3	epsin 3 [Source:VGNC Symbol;Acc:VGNC:87743]	100737860
ENSSSCG00000050566	60.7957	-1.31312	0.384476	-3.41534	0.000637022	0.0415052	DOWN			NA
ENSSSCG00000042162	196.955	-1.31637	0.211441	-6.22571	4.79392e-10	6.19891e-07	DOWN	KCNJ11	potassium inwardly rectifying channel subfamily J member 11 [Source:HGNC Symbol;Acc:HGNC:6257]	100158240
ENSSSCG00000038264	52.8482	-1.31693	0.270103	-4.87568	1.08436e-06	0.000455702	DOWN			110261361
ENSSSCG00000006762	607.578	-1.34367	0.310322	-4.32992	1.49164e-05	0.0036031	DOWN	AP4B1	adaptor related protein complex 4 subunit beta 1 [Source:VGNC Symbol;Acc:VGNC:85391]	100516855
ENSSSCG00000009215	228.458	-1.36434	0.25001	-5.45714	4.83863e-08	3.25349e-05	DOWN	ABCG2	ATP-binding cassette, sub-family G (WHITE), member 2 [Source:NCBI gene (formerly Entrezgene);Acc:397073]	110255210
ENSSSCG00000045084	51.0239	-1.37653	0.411653	-3.34391	0.000826061	0.0497066	DOWN			NA
ENSSSCG00000004869	126.929	-1.38526	0.236166	-5.86562	4.47463e-09	4.17881e-06	DOWN	CNDP1	carnosine dipeptidase 1 [Source:VGNC Symbol;Acc:VGNC:86811]	100516053
ENSSSCG00000033716	44.2182	-1.43354	0.339874	-4.21786	2.46627e-05	0.00488428	DOWN			100512544
ENSSSCG00000008830	113.521	-1.43911	0.359186	-4.00658	6.16031e-05	0.00950044	DOWN	CWH43	cell wall biosis 43 C-terminal homolog [Source:VGNC Symbol;Acc:VGNC:87098]	100521324
ENSSSCG00000036808	1371.31	-1.43954	0.248372	-5.7959	6.79575e-09	6.01245e-06	DOWN	HMGCS2	3-hydroxy-3-methylglutaryl-CoA synthase 2 [Source:NCBI gene (formerly Entrezgene);Acc:397673]	397673
ENSSSCG00000046180	29.4642	-1.47013	0.403902	-3.63982	0.000272827	0.0236403	DOWN			NA
ENSSSCG00000012350	26.6851	-1.4959	0.373095	-4.00943	6.08652e-05	0.00947978	DOWN	MAGEH1	MAGE family member H1 [Source:VGNC Symbol;Acc:VGNC:89953]	100519347
ENSSSCG00000047250	70.0131	-1.51646	0.407725	-3.71932	0.00019976	0.0187531	DOWN			NA
ENSSSCG00000023596	33.928	-1.53162	0.339459	-4.51195	6.42338e-06	0.00183012	DOWN			100738050
ENSSSCG00000048806	36.2722	-1.56556	0.447923	-3.49514	0.000473806	0.0336063	DOWN			NA
ENSSSCG00000015334	108.144	-1.60702	0.404847	-3.96945	7.20376e-05	0.0100222	DOWN	PDK4	pyruvate dehydrogenase kinase 4 [Source:VGNC Symbol;Acc:VGNC:91280]	100286778
ENSSSCG00000001938	90.4131	-1.62183	0.423132	-3.83292	0.00012663	0.0140043	DOWN	SSTR1	somatostatin receptor 1 [Source:VGNC Symbol;Acc:VGNC:93496]	397004
ENSSSCG00000009220	36.1516	-1.64112	0.452577	-3.62617	0.000287658	0.0245459	DOWN	DMP1	dentin matrix acidic phosphoprotein 1 [Source:VGNC Symbol;Acc:VGNC:87348]	399688
ENSSSCG00000014314	35.1027	-1.66165	0.324335	-5.12325	3.00319e-07	0.000162284	DOWN			100517085
ENSSSCG00000016726	40.1478	-1.68799	0.422591	-3.99438	6.48647e-05	0.00964934	DOWN	ADCY1	adenylate cyclase 1 [Source:VGNC Symbol;Acc:VGNC:85105]	100624934
ENSSSCG00000008072	21.4524	-1.71927	0.455209	-3.77689	0.000158801	0.0166121	DOWN	ASPN	asporin [Source:VGNC Symbol;Acc:VGNC:85586]	100511749
ENSSSCG00000031589	19.0902	-1.78886	0.423029	-4.22869	2.35055e-05	0.00476058	DOWN			100152623
ENSSSCG00000035170	54.2873	-1.8669	0.335528	-5.56407	2.63555e-08	1.92624e-05	DOWN	VSIG4	V-set and immunoglobulin domain containing 4 [Source:VGNC Symbol;Acc:VGNC:94869]	100156239
ENSSSCG00000009221	14.2499	-1.86805	0.549118	-3.40191	0.00066916	0.0432638	DOWN	DSPP	dentin sialophosphoprotein [Source:NCBI gene (formerly Entrezgene);Acc:396664]	396664
ENSSSCG00000010926	47.8973	-1.91484	0.540542	-3.54244	0.000396441	0.0307105	DOWN	SYT2	synaptotagmin 2 [Source:VGNC Symbol;Acc:VGNC:95530]	100511582
ENSSSCG00000012490	24.7371	-2.1235	0.528503	-4.01795	5.87067e-05	0.00940247	DOWN	TMEM35A	transmembrane protein 35A [Source:VGNC Symbol;Acc:VGNC:94172]	100516714
ENSSSCG00000022568	12.8445	-2.15152	0.622565	-3.4559	0.000548464	0.0371761	DOWN	TMPRSS3	transmembrane serine protease 3 [Source:VGNC Symbol;Acc:VGNC:94235]	100627826
ENSSSCG00000045261	11.8279	-2.18367	0.623052	-3.50479	0.000456968	0.0331003	DOWN			NA
ENSSSCG00000051033	15.1607	-2.27284	0.581759	-3.90684	9.35118e-05	0.0119995	DOWN			NA
ENSSSCG00000044435	11.9432	-2.40071	0.631694	-3.80043	0.000144443	0.0154655	DOWN			NA
ENSSSCG00000023162	33.8793	-2.41528	0.482762	-5.00305	5.64313e-07	0.000271031	DOWN	CDH3	cadherin 3 [Source:VGNC Symbol;Acc:VGNC:96941]	100187727
ENSSSCG00000047296	15.6311	-2.46177	0.640699	-3.84231	0.00012188	0.0138432	DOWN			NA
ENSSSCG00000034251	7.78268	-2.53605	0.757136	-3.34953	0.000809482	0.0489595	DOWN			NA
ENSSSCG00000044574	2768.22	-2.57541	0.627261	-4.1058	4.02918e-05	0.00728285	DOWN			NA
ENSSSCG00000035893	18.0003	-2.66546	0.493217	-5.40423	6.50884e-08	4.05236e-05	DOWN			102167302
ENSSSCG00000021647	15.0248	-2.70173	0.718745	-3.75895	0.000170628	0.0174894	DOWN	EDA	ectodysplasin A [Source:VGNC Symbol;Acc:VGNC:87540]	100518887
ENSSSCG00000004836	7.30991	-2.78806	0.810613	-3.43945	0.000582897	0.0389057	DOWN	MKRN3	makorin ring finger protein 3 [Source:VGNC Symbol;Acc:VGNC:90249]	100155343
ENSSSCG00000045343	11.4922	-2.88224	0.698706	-4.12512	3.70549e-05	0.00684498	DOWN			NA
ENSSSCG00000011937	11.3565	-3.0201	0.740878	-4.07637	4.57433e-05	0.00792727	DOWN	MORC1	MORC family CW-type zinc finger 1 [Source:VGNC Symbol;Acc:VGNC:90302]	100620480
ENSSSCG00000044009	13.8508	-3.03476	0.593641	-5.11211	3.18582e-07	0.000162284	DOWN			NA
ENSSSCG00000008118	28.0692	-3.10688	0.720672	-4.31109	1.6245e-05	0.00374459	DOWN	PROM2	prominin 2 [Source:VGNC Symbol;Acc:VGNC:91833]	100521959
ENSSSCG00000049063	8.65497	-3.22515	0.843107	-3.82531	0.000130606	0.0143496	DOWN			NA
ENSSSCG00000035756	6.65527	-3.32602	0.923247	-3.60252	0.000315146	0.0263563	DOWN			110258323
ENSSSCG00000049086	32.1311	-3.51065	0.736069	-4.76945	1.84728e-06	0.000700079	DOWN			NA
ENSSSCG00000042961	7.6624	-3.65996	1.01946	-3.59008	0.000330578	0.0268455	DOWN			NA
ENSSSCG00000006472	9.72974	-3.74333	1.10646	-3.38315	0.000716594	0.0451159	DOWN	CRABP2	cellular retinoic acid binding protein 2 [Source:VGNC Symbol;Acc:VGNC:86972]	100155151
ENSSSCG00000012517	15.017	-3.76879	0.640377	-5.88527	3.97396e-09	3.92954e-06	DOWN			100525848
ENSSSCG00000031524	22.1634	-4.14972	0.797389	-5.20413	1.9491e-07	0.00011298	DOWN	DPPA2	developmental pluripotency associated 2 [Source:HGNC Symbol;Acc:HGNC:19197]	100620381
ENSSSCG00000042459	12.6025	-4.71783	0.858191	-5.4974	3.85422e-08	2.69956e-05	DOWN			NA
ENSSSCG00000042268	3.96746	-4.76379	1.26583	-3.76336	0.000167645	0.0172891	DOWN			NA
ENSSSCG00000046220	4.44	-4.9243	1.39924	-3.51928	0.000432725	0.031904	DOWN			NA
ENSSSCG00000043490	2.76781	-5.00636	1.47837	-3.3864	0.000708152	0.044752	DOWN			NA
ENSSSCG00000045479	3.83947	-5.47398	1.55616	-3.51763	0.000435417	0.0319623	DOWN			NA
ENSSSCG00000040992	4.67857	-5.76285	1.54867	-3.72116	0.000198307	0.0187531	DOWN			NA
ENSSSCG00000034371	172.732	-7.53847	0.557884	-13.5126	1.31768e-41	7.38343e-38	DOWN			NA
