# Supplementary material for: Study on the Characteristics of Coarse Feeding Tolerance of Ding’an Pigs: Phenotypic and Candidate Genes Identification
Source: Genes (Basel). 2024 May 8;15(5):599. doi: 10.3390/genes15050599 (PMC11121715; doi:10.3390/genes15050599)
Supplement: Supplementary file 1 [file genes-15-00599-s001.zip › Supplementary Table S4. 65Differential Gene Expression.xlsx]

## Sheet: 65
Supplementary Table S4: 65 Differential Expression Genes
id
ENSSSCG00000048905
ENSSSCG00000029061
ENSSSCG00000017556
ENSSSCG00000007549
ENSSSCG00000004923
ENSSSCG00000047929
ENSSSCG00000025414
ENSSSCG00000016915
ENSSSCG00000009380
ENSSSCG00000034515
ENSSSCG00000040934
ENSSSCG00000040770
ENSSSCG00000015895
ENSSSCG00000032557
ENSSSCG00000034440
ENSSSCG00000025885
ENSSSCG00000004565
ENSSSCG00000033815
ENSSSCG00000015276
ENSSSCG00000030150
ENSSSCG00000004615
ENSSSCG00000038071
ENSSSCG00000033539
ENSSSCG00000023630
ENSSSCG00000008943
ENSSSCG00000006780
ENSSSCG00000005282
ENSSSCG00000043909
ENSSSCG00000049117
ENSSSCG00000037645
ENSSSCG00000005511
ENSSSCG00000000951
ENSSSCG00000013111
ENSSSCG00000003088
ENSSSCG00000002962
ENSSSCG00000013115
ENSSSCG00000034615
ENSSSCG00000025618
ENSSSCG00000024015
ENSSSCG00000003608
ENSSSCG00000017494
ENSSSCG00000031361
ENSSSCG00000005949
ENSSSCG00000029267
ENSSSCG00000045414
ENSSSCG00000007508
ENSSSCG00000023379
ENSSSCG00000021036
ENSSSCG00000000978
ENSSSCG00000033260
ENSSSCG00000035297
ENSSSCG00000031106
ENSSSCG00000007816
ENSSSCG00000037358
ENSSSCG00000040575
ENSSSCG00000042108
ENSSSCG00000016900
ENSSSCG00000004890
ENSSSCG00000023762
ENSSSCG00000011827
ENSSSCG00000032017
ENSSSCG00000014987
ENSSSCG00000035171
ENSSSCG00000031085
ENSSSCG00000009921
