# Supplementary material for: Study on the Characteristics of Coarse Feeding Tolerance of Ding’an Pigs: Phenotypic and Candidate Genes Identification
Source: Genes (Basel). 2024 May 8;15(5):599. doi: 10.3390/genes15050599 (PMC11121715; doi:10.3390/genes15050599)
Supplement: Supplementary file 1 [file genes-15-00599-s001.zip › Supplementary Table S5..xlsx]

## Sheet: turquoisemodule_geneids_genesid
Supplementary Table S5: 482 Differential Expression Genes in Turquoise module.
id
ENSSSCG00000040009
ENSSSCG00000032557
ENSSSCG00000008640
ENSSSCG00000016215
ENSSSCG00000012394
ENSSSCG00000039476
ENSSSCG00000010334
ENSSSCG00000012517
ENSSSCG00000012350
ENSSSCG00000050359
ENSSSCG00000001073
ENSSSCG00000049063
ENSSSCG00000017208
ENSSSCG00000001917
ENSSSCG00000029945
ENSSSCG00000016444
ENSSSCG00000005729
ENSSSCG00000043182
ENSSSCG00000042459
ENSSSCG00000047896
ENSSSCG00000016517
ENSSSCG00000010489
ENSSSCG00000026079
ENSSSCG00000014314
ENSSSCG00000016443
ENSSSCG00000028210
ENSSSCG00000031212
ENSSSCG00000025578
ENSSSCG00000035212
ENSSSCG00000014286
ENSSSCG00000036893
ENSSSCG00000000985
ENSSSCG00000015083
ENSSSCG00000033636
ENSSSCG00000043761
ENSSSCG00000024232
ENSSSCG00000002701
ENSSSCG00000034220
ENSSSCG00000005235
ENSSSCG00000031919
ENSSSCG00000028871
ENSSSCG00000039373
ENSSSCG00000017932
ENSSSCG00000029761
ENSSSCG00000037850
ENSSSCG00000021638
ENSSSCG00000016920
ENSSSCG00000032483
ENSSSCG00000005594
ENSSSCG00000026108
ENSSSCG00000014411
ENSSSCG00000046460
ENSSSCG00000029843
ENSSSCG00000049725
ENSSSCG00000012326
ENSSSCG00000048556
ENSSSCG00000035893
ENSSSCG00000011169
ENSSSCG00000028010
ENSSSCG00000039244
ENSSSCG00000011850
ENSSSCG00000047771
ENSSSCG00000022009
ENSSSCG00000030026
ENSSSCG00000047264
ENSSSCG00000012367
ENSSSCG00000005199
ENSSSCG00000038535
ENSSSCG00000012978
ENSSSCG00000027118
ENSSSCG00000040998
ENSSSCG00000022953
ENSSSCG00000006762
ENSSSCG00000005325
ENSSSCG00000029304
ENSSSCG00000018402
ENSSSCG00000002479
ENSSSCG00000012121
ENSSSCG00000000978
ENSSSCG00000034251
ENSSSCG00000034698
ENSSSCG00000030578
ENSSSCG00000034976
ENSSSCG00000046006
ENSSSCG00000017565
ENSSSCG00000008816
ENSSSCG00000034821
ENSSSCG00000036208
ENSSSCG00000028695
ENSSSCG00000045390
ENSSSCG00000024018
ENSSSCG00000008233
ENSSSCG00000021355
ENSSSCG00000012127
ENSSSCG00000033766
ENSSSCG00000012336
ENSSSCG00000002921
ENSSSCG00000000046
ENSSSCG00000012125
ENSSSCG00000045261
ENSSSCG00000000207
ENSSSCG00000032003
ENSSSCG00000016579
ENSSSCG00000009225
ENSSSCG00000040047
ENSSSCG00000026472
ENSSSCG00000012437
ENSSSCG00000043903
ENSSSCG00000036553
ENSSSCG00000028995
ENSSSCG00000014854
ENSSSCG00000025953
ENSSSCG00000015540
ENSSSCG00000016601
ENSSSCG00000012392
ENSSSCG00000041512
ENSSSCG00000050640
ENSSSCG00000007760
ENSSSCG00000040470
ENSSSCG00000033116
ENSSSCG00000045084
ENSSSCG00000029414
ENSSSCG00000039144
ENSSSCG00000028464
ENSSSCG00000003663
ENSSSCG00000039009
ENSSSCG00000008072
ENSSSCG00000017520
ENSSSCG00000005278
ENSSSCG00000024058
ENSSSCG00000005627
ENSSSCG00000032481
ENSSSCG00000038264
ENSSSCG00000029043
ENSSSCG00000014080
ENSSSCG00000007382
ENSSSCG00000022131
ENSSSCG00000031128
ENSSSCG00000002997
ENSSSCG00000012589
ENSSSCG00000044015
ENSSSCG00000048502
ENSSSCG00000033780
ENSSSCG00000050540
ENSSSCG00000016533
ENSSSCG00000002501
ENSSSCG00000009963
ENSSSCG00000012885
ENSSSCG00000011157
ENSSSCG00000024088
ENSSSCG00000007243
ENSSSCG00000047296
ENSSSCG00000025673
ENSSSCG00000041715
ENSSSCG00000028144
ENSSSCG00000014214
ENSSSCG00000007492
ENSSSCG00000002309
ENSSSCG00000007384
ENSSSCG00000033190
ENSSSCG00000001078
ENSSSCG00000021598
ENSSSCG00000038753
ENSSSCG00000020512
ENSSSCG00000011641
ENSSSCG00000004364
ENSSSCG00000042162
ENSSSCG00000022797
ENSSSCG00000042150
ENSSSCG00000011171
ENSSSCG00000039769
ENSSSCG00000039820
ENSSSCG00000002504
ENSSSCG00000003146
ENSSSCG00000040569
ENSSSCG00000044574
ENSSSCG00000001938
ENSSSCG00000038679
ENSSSCG00000035617
ENSSSCG00000041466
ENSSSCG00000013065
ENSSSCG00000007753
ENSSSCG00000001423
ENSSSCG00000040875
ENSSSCG00000007456
ENSSSCG00000032297
ENSSSCG00000037142
ENSSSCG00000002967
ENSSSCG00000024791
ENSSSCG00000045892
ENSSSCG00000047522
ENSSSCG00000028501
ENSSSCG00000027928
ENSSSCG00000000853
ENSSSCG00000051287
ENSSSCG00000010960
ENSSSCG00000009860
ENSSSCG00000012530
ENSSSCG00000002144
ENSSSCG00000040556
ENSSSCG00000047648
ENSSSCG00000039977
ENSSSCG00000016792
ENSSSCG00000025260
ENSSSCG00000009649
ENSSSCG00000024674
ENSSSCG00000051033
ENSSSCG00000039712
ENSSSCG00000025787
ENSSSCG00000012063
ENSSSCG00000024914
ENSSSCG00000011292
ENSSSCG00000036465
ENSSSCG00000010772
ENSSSCG00000012879
ENSSSCG00000000139
ENSSSCG00000010826
ENSSSCG00000007079
ENSSSCG00000035337
ENSSSCG00000034213
ENSSSCG00000021702
ENSSSCG00000005859
ENSSSCG00000036438
ENSSSCG00000017256
ENSSSCG00000033586
ENSSSCG00000051482
ENSSSCG00000047250
ENSSSCG00000034371
ENSSSCG00000021866
ENSSSCG00000003801
ENSSSCG00000006957
ENSSSCG00000007344
ENSSSCG00000014247
ENSSSCG00000005216
ENSSSCG00000038057
ENSSSCG00000017926
ENSSSCG00000010840
ENSSSCG00000012386
ENSSSCG00000012056
ENSSSCG00000013241
ENSSSCG00000005380
ENSSSCG00000044449
ENSSSCG00000002450
ENSSSCG00000022153
ENSSSCG00000010188
ENSSSCG00000004873
ENSSSCG00000009140
ENSSSCG00000044435
ENSSSCG00000023162
ENSSSCG00000034474
ENSSSCG00000032423
ENSSSCG00000017254
ENSSSCG00000034545
ENSSSCG00000012425
ENSSSCG00000002099
ENSSSCG00000029291
ENSSSCG00000004928
ENSSSCG00000009209
ENSSSCG00000031692
ENSSSCG00000038329
ENSSSCG00000001982
ENSSSCG00000023912
ENSSSCG00000009524
ENSSSCG00000009648
ENSSSCG00000011557
ENSSSCG00000028359
ENSSSCG00000000610
ENSSSCG00000020706
ENSSSCG00000043669
ENSSSCG00000044439
ENSSSCG00000035074
ENSSSCG00000032016
ENSSSCG00000005152
ENSSSCG00000044908
ENSSSCG00000024444
ENSSSCG00000012030
ENSSSCG00000050627
ENSSSCG00000013113
ENSSSCG00000045461
ENSSSCG00000013307
ENSSSCG00000048179
ENSSSCG00000016570
ENSSSCG00000020211
ENSSSCG00000034066
ENSSSCG00000011363
ENSSSCG00000036007
ENSSSCG00000000385
ENSSSCG00000033580
ENSSSCG00000005284
ENSSSCG00000000418
ENSSSCG00000006932
ENSSSCG00000007212
ENSSSCG00000033993
ENSSSCG00000040416
ENSSSCG00000006733
ENSSSCG00000038660
ENSSSCG00000016563
ENSSSCG00000016522
ENSSSCG00000021728
ENSSSCG00000040275
ENSSSCG00000031075
ENSSSCG00000000884
ENSSSCG00000036427
ENSSSCG00000040533
ENSSSCG00000007572
ENSSSCG00000023584
ENSSSCG00000045919
ENSSSCG00000021238
ENSSSCG00000032574
ENSSSCG00000010610
ENSSSCG00000035574
ENSSSCG00000045819
ENSSSCG00000018007
ENSSSCG00000001396
ENSSSCG00000012490
ENSSSCG00000011827
ENSSSCG00000008745
ENSSSCG00000023915
ENSSSCG00000012510
ENSSSCG00000026812
ENSSSCG00000012315
ENSSSCG00000015268
ENSSSCG00000032525
ENSSSCG00000023788
ENSSSCG00000002714
ENSSSCG00000042264
ENSSSCG00000007192
ENSSSCG00000017239
ENSSSCG00000006738
ENSSSCG00000034758
ENSSSCG00000043319
ENSSSCG00000001987
ENSSSCG00000033716
ENSSSCG00000045581
ENSSSCG00000031306
ENSSSCG00000031267
ENSSSCG00000043011
ENSSSCG00000046390
ENSSSCG00000037637
ENSSSCG00000011851
ENSSSCG00000048237
ENSSSCG00000034114
ENSSSCG00000034727
ENSSSCG00000049683
ENSSSCG00000041289
ENSSSCG00000047297
ENSSSCG00000037559
ENSSSCG00000043175
ENSSSCG00000012074
ENSSSCG00000017925
ENSSSCG00000042492
ENSSSCG00000004065
ENSSSCG00000006742
ENSSSCG00000008593
ENSSSCG00000015632
ENSSSCG00000036871
ENSSSCG00000015136
ENSSSCG00000016793
ENSSSCG00000038993
ENSSSCG00000038275
ENSSSCG00000031849
ENSSSCG00000011246
ENSSSCG00000005615
ENSSSCG00000001989
ENSSSCG00000026005
ENSSSCG00000002464
ENSSSCG00000011230
ENSSSCG00000036649
ENSSSCG00000008898
ENSSSCG00000034699
ENSSSCG00000021434
ENSSSCG00000032135
ENSSSCG00000023298
ENSSSCG00000029879
ENSSSCG00000015930
ENSSSCG00000004869
ENSSSCG00000035420
ENSSSCG00000016900
ENSSSCG00000015543
ENSSSCG00000016489
ENSSSCG00000035170
ENSSSCG00000005203
ENSSSCG00000012504
ENSSSCG00000015828
ENSSSCG00000020963
ENSSSCG00000029838
ENSSSCG00000030088
ENSSSCG00000051585
ENSSSCG00000029365
ENSSSCG00000000135
ENSSSCG00000014310
ENSSSCG00000046574
ENSSSCG00000006413
ENSSSCG00000011673
ENSSSCG00000040611
ENSSSCG00000048405
ENSSSCG00000002906
ENSSSCG00000002469
ENSSSCG00000011727
ENSSSCG00000050408
ENSSSCG00000045836
ENSSSCG00000032551
ENSSSCG00000031736
ENSSSCG00000013248
ENSSSCG00000040158
ENSSSCG00000030879
ENSSSCG00000004224
ENSSSCG00000008118
ENSSSCG00000051647
ENSSSCG00000026360
ENSSSCG00000044522
ENSSSCG00000023918
ENSSSCG00000037288
ENSSSCG00000031589
ENSSSCG00000000920
ENSSSCG00000013408
ENSSSCG00000009638
ENSSSCG00000041146
ENSSSCG00000007717
ENSSSCG00000017328
ENSSSCG00000004233
ENSSSCG00000006141
ENSSSCG00000006051
ENSSSCG00000015462
ENSSSCG00000002078
ENSSSCG00000041717
ENSSSCG00000014874
ENSSSCG00000031423
ENSSSCG00000040362
ENSSSCG00000051079
ENSSSCG00000036520
ENSSSCG00000049534
ENSSSCG00000044255
ENSSSCG00000039758
ENSSSCG00000047706
ENSSSCG00000039709
ENSSSCG00000005324
ENSSSCG00000010330
ENSSSCG00000029990
ENSSSCG00000016682
ENSSSCG00000029323
ENSSSCG00000006003
ENSSSCG00000034792
ENSSSCG00000009220
ENSSSCG00000022014
ENSSSCG00000031269
ENSSSCG00000027226
ENSSSCG00000041918
ENSSSCG00000040203
ENSSSCG00000023929
ENSSSCG00000008002
ENSSSCG00000026592
ENSSSCG00000035534
ENSSSCG00000012527
ENSSSCG00000003616
ENSSSCG00000001040
ENSSSCG00000044487
ENSSSCG00000028149
ENSSSCG00000010915
ENSSSCG00000007814
ENSSSCG00000012960
ENSSSCG00000003913
ENSSSCG00000035582
ENSSSCG00000043775
ENSSSCG00000008124
ENSSSCG00000008081
ENSSSCG00000023322
ENSSSCG00000012409
ENSSSCG00000004701
ENSSSCG00000028755
ENSSSCG00000051023
ENSSSCG00000015949
ENSSSCG00000037035
ENSSSCG00000047513
ENSSSCG00000011145
ENSSSCG00000009540
ENSSSCG00000036387
ENSSSCG00000028772
ENSSSCG00000036808
ENSSSCG00000044572
ENSSSCG00000002557
ENSSSCG00000027665
