# Supplementary material for: Study on the Characteristics of Coarse Feeding Tolerance of Ding’an Pigs: Phenotypic and Candidate Genes Identification
Source: Genes (Basel). 2024 May 8;15(5):599. doi: 10.3390/genes15050599 (PMC11121715; doi:10.3390/genes15050599)
Supplement: Supplementary file 1 [file genes-15-00599-s001.zip › Supplementary Table S6..xls]

## Sheet: KEGG
Supplementary Table S6: KEGG functional enrichment of 482 candidate genes for coarse feeding tolerance in the Turquoise module.
KEGG_A_class	KEGG_B_class	Pathway	out (160)	All (9578)	Pvalue	Qvalue	Pathway ID	Genes	K_IDs
Metabolism	Xenobiotics biodegradation and metabolism	Drug metabolism - cytochrome P450	6	63	0.000612455	0.0614767	ko00982	ENSSSCG00000031736;ENSSSCG00000015268;ENSSSCG00000034976;ENSSSCG00000010610;ENSSSCG00000032003;ENSSSCG00000028501	K00799+K00485+K00699+K00799+K23790+K00129
Metabolism	Global and overview maps	Metabolic pathways	44	1655	0.000775923	0.0614767	ko01100	ENSSSCG00000014247;ENSSSCG00000006141;ENSSSCG00000038660;ENSSSCG00000004869;ENSSSCG00000029945;ENSSSCG00000034213;ENSSSCG00000001078;ENSSSCG00000038329;ENSSSCG00000025578;ENSSSCG00000028359;ENSSSCG00000031736;ENSSSCG00000029761;ENSSSCG00000040203;ENSSSCG00000022009;ENSSSCG00000012315;ENSSSCG00000026079;ENSSSCG00000015462;ENSSSCG00000040569;ENSSSCG00000016601;ENSSSCG00000036808;ENSSSCG00000036438;…	K14085+K01672+K00452+K05604+K00639+K01441+K13517+K05290+K07249+K18152+K00799+K07127+K02437+K01593+K20279+K00615+K00949+K01047+K01197+K01641+K00432+K01081+K00939+K00739+K00600+K00868+K12357+K00021+K00281+K01135+K00079+K00699+K07023+K00799+K09657+K23790+K00016+K00939+K09658+K01432+K00718+K00129+K13051+K11149
Metabolism	Amino acid metabolism	Glycine, serine and threonine metabolism	5	47	0.00106396	0.0614767	ko00260	ENSSSCG00000014247;ENSSSCG00000029945;ENSSSCG00000040203;ENSSSCG00000036208;ENSSSCG00000005199	K14085+K00639+K02437+K00600+K00281
Metabolism	Xenobiotics biodegradation and metabolism	Metabolism of xenobiotics by cytochrome P450	6	70	0.00107383	0.0614767	ko00980	ENSSSCG00000031736;ENSSSCG00000020706;ENSSSCG00000034976;ENSSSCG00000010610;ENSSSCG00000032003;ENSSSCG00000028501	K00799+K00079+K00699+K00799+K23790+K00129
Metabolism	Xenobiotics biodegradation and metabolism	Drug metabolism - other enzymes	6	77	0.00176458	0.0808179	ko00983	ENSSSCG00000001073;ENSSSCG00000031736;ENSSSCG00000034220;ENSSSCG00000034976;ENSSSCG00000010610;ENSSSCG00000032003	K00569+K00799+K01044+K00699+K00799+K23790
Metabolism	Metabolism of cofactors and vitamins	Thiamine metabolism	3	16	0.00218339	0.0833328	ko00730	ENSSSCG00000015462;ENSSSCG00000002504;ENSSSCG00000005627	K00949+K00939+K00939
Metabolism	Carbohydrate metabolism	Glyoxylate and dicarboxylate metabolism	4	36	0.00291354	0.0953143	ko00630	ENSSSCG00000040203;ENSSSCG00000036208;ENSSSCG00000005199;ENSSSCG00000033636	K02437+K00600+K00281+K01432
Human Diseases	Cancer: overview	Chemical carcinogenesis - DNA adducts	5	68	0.00546303	0.156379	ko05204	ENSSSCG00000031736;ENSSSCG00000020706;ENSSSCG00000034976;ENSSSCG00000010610;ENSSSCG00000032003	K00799+K00079+K00699+K00799+K23790
Metabolism	Amino acid metabolism	Histidine metabolism	3	23	0.00633884	0.161288	ko00340	ENSSSCG00000014247;ENSSSCG00000004869;ENSSSCG00000028501	K14085+K05604+K00129
Metabolism	Amino acid metabolism	Tryptophan metabolism	4	46	0.00709584	0.162495	ko00380	ENSSSCG00000014247;ENSSSCG00000038660;ENSSSCG00000022009;ENSSSCG00000033636	K14085+K00452+K01593+K01432
Metabolism	Glycan biosynthesis and metabolism	Glycosylphosphatidylinositol (GPI)-anchor biosynthesis	3	26	0.00897234	0.186788	ko00563	ENSSSCG00000038329;ENSSSCG00000029291;ENSSSCG00000032481	K05290+K08098+K09658
Human Diseases	Drug resistance: antineoplastic	Platinum drug resistance	5	85	0.0137241	0.261902	ko01524	ENSSSCG00000000884;ENSSSCG00000031736;ENSSSCG00000012437;ENSSSCG00000010610;ENSSSCG00000032003	K02084+K00799+K17686+K00799+K23790
Metabolism	Metabolism of other amino acids	Glutathione metabolism	4	61	0.0187301	0.306574	ko00480	ENSSSCG00000031736;ENSSSCG00000036438;ENSSSCG00000010610;ENSSSCG00000032003	K00799+K00432+K00799+K23790
Metabolism	Metabolism of other amino acids	beta-Alanine metabolism	3	34	0.0187425	0.306574	ko00410	ENSSSCG00000014247;ENSSSCG00000004869;ENSSSCG00000028501	K14085+K05604+K00129
Metabolism	Amino acid metabolism	Phenylalanine metabolism	2	19	0.0393751	0.601126	ko00360	ENSSSCG00000022009;ENSSSCG00000028501	K01593+K00129
Human Diseases	Endocrine and metabolic disease	Type II diabetes mellitus	3	48	0.0457936	0.637457	ko04930	ENSSSCG00000042162;ENSSSCG00000015543;ENSSSCG00000023915	K05004+K04852+K07191
Metabolism	Glycan biosynthesis and metabolism	Glycosaminoglycan degradation	2	21	0.0473221	0.637457	ko00531	ENSSSCG00000016601;ENSSSCG00000038535	K01197+K01135
Metabolism	Metabolism of terpenoids and polyketides	Terpenoid backbone biosynthesis	2	22	0.0514964	0.655148	ko00900	ENSSSCG00000036808;ENSSSCG00000014080	K01641+K00021
Human Diseases	Cancer: specific types	Hepatocellular carcinoma	6	170	0.0652695	0.786669	ko05225	ENSSSCG00000031736;ENSSSCG00000029838;ENSSSCG00000023929;ENSSSCG00000010610;ENSSSCG00000032003;ENSSSCG00000012885	K00799+K02235+K22182+K00799+K23790+K03068
Metabolism	Nucleotide metabolism	Purine metabolism	5	134	0.0736773	0.843605	ko00230	ENSSSCG00000029761;ENSSSCG00000028210;ENSSSCG00000002504;ENSSSCG00000004224;ENSSSCG00000005627	K07127+K01081+K00939+K07023+K00939
Metabolism	Carbohydrate metabolism	Ascorbate and aldarate metabolism	2	29	0.0839684	0.871046	ko00053	ENSSSCG00000014247;ENSSSCG00000034976	K14085+K00699
Environmental Information Processing	Membrane transport	ABC transporters	3	62	0.0848237	0.871046	ko02010	ENSSSCG00000029990;ENSSSCG00000017256;ENSSSCG00000010188	K23125+K05649+K05657
Environmental Information Processing	Signaling molecules and interaction	Cell adhesion molecules	7	228	0.087485	0.871046	ko04514	ENSSSCG00000006738;ENSSSCG00000012030;ENSSSCG00000001917;ENSSSCG00000002078;ENSSSCG00000002099;ENSSSCG00000023162;ENSSSCG00000001396	K06492+K06087+K06746+K10784+K10784+K06796+K06751
Metabolism	Carbohydrate metabolism	Glycolysis / Gluconeogenesis	3	68	0.104756	0.893465	ko00010	ENSSSCG00000014247;ENSSSCG00000032557;ENSSSCG00000028501	K14085+K00016+K00129
Cellular Processes	Cell growth and death	Apoptosis	5	150	0.106298	0.893465	ko04210	ENSSSCG00000045461;ENSSSCG00000000884;ENSSSCG00000009140;ENSSSCG00000016215;ENSSSCG00000011171	K10798+K02084+K04396+K07374+K01365
Metabolism	Metabolism of cofactors and vitamins	Folate biosynthesis	2	34	0.110024	0.893465	ko00790	ENSSSCG00000037637;ENSSSCG00000020706	K01307+K00079
Human Diseases	Cardiovascular disease	Fluid shear stress and atherosclerosis	5	156	0.120102	0.893465	ko05418	ENSSSCG00000031736;ENSSSCG00000017254;ENSSSCG00000011171;ENSSSCG00000010610;ENSSSCG00000032003	K00799+K04433+K01365+K00799+K23790
Organismal Systems	Immune system	Cytosolic DNA-sensing pathway	3	73	0.122632	0.893465	ko04623	ENSSSCG00000005152;ENSSSCG00000001987;ENSSSCG00000005203	K05414+K08847+K12967
Organismal Systems	Immune system	Antigen processing and presentation	4	114	0.123309	0.893465	ko04612	ENSSSCG00000011171;ENSSSCG00000002078;ENSSSCG00000002099;ENSSSCG00000001396	K01365+K10784+K10784+K06751
Metabolism	Metabolism of cofactors and vitamins	Vitamin B6 metabolism	1	8	0.126125	0.893465	ko00750	ENSSSCG00000034758	K00868
Metabolism	Metabolism of cofactors and vitamins	Nicotinate and nicotinamide metabolism	2	37	0.126544	0.893465	ko00760	ENSSSCG00000028359;ENSSSCG00000028210	K18152+K01081
Organismal Systems	Aging	Longevity regulating pathway - worm	2	37	0.126544	0.893465	ko04212	ENSSSCG00000045461;ENSSSCG00000010610	K10798+K00799
Organismal Systems	Endocrine system	Thyroid hormone synthesis	3	75	0.130076	0.893465	ko04918	ENSSSCG00000006733;ENSSSCG00000036438;ENSSSCG00000017932	K15173+K00432+K10064
Metabolism	Global and overview maps	Carbon metabolism	4	119	0.138	0.893465	ko01200	ENSSSCG00000040203;ENSSSCG00000026079;ENSSSCG00000036208;ENSSSCG00000005199	K02437+K00615+K00600+K00281
Human Diseases	Immune disease	Autoimmune thyroid disease	4	119	0.138	0.893465	ko05320	ENSSSCG00000005152;ENSSSCG00000002078;ENSSSCG00000002099;ENSSSCG00000001396	K05414+K10784+K10784+K06751
Metabolism	Amino acid metabolism	Tyrosine metabolism	2	41	0.149395	0.893465	ko00350	ENSSSCG00000022009;ENSSSCG00000028501	K01593+K00129
Genetic Information Processing	Translation	Ribosome biogenesis in eukaryotes	3	81	0.153313	0.893465	ko03008	ENSSSCG00000026812;ENSSSCG00000012336;ENSSSCG00000011827	K14568+K14538+K14539
Metabolism	Metabolism of cofactors and vitamins	Retinol metabolism	3	82	0.157307	0.893465	ko00830	ENSSSCG00000025578;ENSSSCG00000034976;ENSSSCG00000015930	K07249+K00699+K11149
Environmental Information Processing	Signal transduction	JAK-STAT signaling pathway	5	173	0.163405	0.893465	ko04630	ENSSSCG00000005152;ENSSSCG00000032135;ENSSSCG00000030088;ENSSSCG00000003801;ENSSSCG00000041289	K05414+K05066+K05066+K05065+K05135
Human Diseases	Drug resistance: antineoplastic	Antifolate resistance	2	44	0.167032	0.893465	ko01523	ENSSSCG00000037637;ENSSSCG00000036208	K01307+K00600
Metabolism	Lipid metabolism	Arachidonic acid metabolism	3	86	0.173597	0.893465	ko00590	ENSSSCG00000040569;ENSSSCG00000036438;ENSSSCG00000020706	K01047+K00432+K00079
Human Diseases	Immune disease	Asthma	3	87	0.177743	0.893465	ko05310	ENSSSCG00000006413;ENSSSCG00000002078;ENSSSCG00000002099	K08089+K10784+K10784
Human Diseases	Cancer: overview	Chemical carcinogenesis - reactive oxygen species	7	276	0.17905	0.893465	ko05208	ENSSSCG00000031736;ENSSSCG00000024674;ENSSSCG00000028144;ENSSSCG00000021355;ENSSSCG00000020706;ENSSSCG00000010330;ENSSSCG00000010610	K00799+K08887+K22368+K04565+K00079+K09565+K00799
Genetic Information Processing	Translation	Aminoacyl-tRNA biosynthesis	2	47	0.185006	0.893465	ko00970	ENSSSCG00000014411;ENSSSCG00000032016	K01869+K01890
Cellular Processes	Transport and catabolism	Lysosome	4	136	0.192628	0.893465	ko04142	ENSSSCG00000006762;ENSSSCG00000016601;ENSSSCG00000011171;ENSSSCG00000038535	K12401+K01197+K01365+K01135
Environmental Information Processing	Signaling molecules and interaction	Cytokine-cytokine receptor interaction	7	282	0.192675	0.893465	ko04060	ENSSSCG00000014310;ENSSSCG00000005152;ENSSSCG00000032135;ENSSSCG00000030088;ENSSSCG00000003801;ENSSSCG00000005203;ENSSSCG00000041289	K10033+K05414+K05066+K05066+K05065+K12967+K05135
Human Diseases	Infectious disease: viral	Epstein-Barr virus infection	7	282	0.192675	0.893465	ko05169	ENSSSCG00000005152;ENSSSCG00000000884;ENSSSCG00000017254;ENSSSCG00000006738;ENSSSCG00000002078;ENSSSCG00000002099;ENSSSCG00000001396	K05414+K02084+K04433+K06492+K10784+K10784+K06751
Genetic Information Processing	Replication and repair	Non-homologous end-joining	1	13	0.196788	0.893465	ko03450	ENSSSCG00000009540	K10777
Human Diseases	Immune disease	Graft-versus-host disease	3	93	0.203158	0.893465	ko05332	ENSSSCG00000002078;ENSSSCG00000002099;ENSSSCG00000001396	K10784+K10784+K06751
Metabolism	Lipid metabolism	Sphingolipid metabolism	2	50	0.20324	0.893465	ko00600	ENSSSCG00000034213;ENSSSCG00000021638	K01441+K12357
Metabolism	Carbohydrate metabolism	Pyruvate metabolism	2	50	0.20324	0.893465	ko00620	ENSSSCG00000014247;ENSSSCG00000032557	K14085+K00016
Cellular Processes	Transport and catabolism	Phagosome	5	189	0.209024	0.893465	ko04145	ENSSSCG00000026592;ENSSSCG00000016215;ENSSSCG00000011171;ENSSSCG00000010334;ENSSSCG00000001396	K10169+K07374+K01365+K10068+K06751
Human Diseases	Infectious disease: viral	Influenza A	5	190	0.212007	0.893465	ko05164	ENSSSCG00000005152;ENSSSCG00000000884;ENSSSCG00000035337;ENSSSCG00000040611;ENSSSCG00000005203	K05414+K02084+K01340+K14404+K12967
Organismal Systems	Digestive system	Bile secretion	3	97	0.220549	0.893465	ko04976	ENSSSCG00000033190;ENSSSCG00000014080;ENSSSCG00000034976	K09864+K00021+K00699
Metabolism	Amino acid metabolism	Valine, leucine and isoleucine degradation	2	53	0.221667	0.893465	ko00280	ENSSSCG00000014247;ENSSSCG00000036808	K14085+K01641
Organismal Systems	Immune system	Complement and coagulation cascades	3	99	0.229357	0.893465	ko04610	ENSSSCG00000024791;ENSSSCG00000035170;ENSSSCG00000024914	K04008+K19822+K01335
Human Diseases	Immune disease	Allograft rejection	3	100	0.233786	0.893465	ko05330	ENSSSCG00000002078;ENSSSCG00000002099;ENSSSCG00000001396	K10784+K10784+K06751
Metabolism	Amino acid metabolism	Arginine and proline metabolism	2	55	0.234027	0.893465	ko00330	ENSSSCG00000014247;ENSSSCG00000004869	K14085+K05604
Metabolism	Metabolism of other amino acids	Selenocompound metabolism	1	16	0.236429	0.893465	ko00450	ENSSSCG00000023929	K22182
Human Diseases	Cardiovascular disease	Viral myocarditis	4	149	0.23826	0.893465	ko05416	ENSSSCG00000024674;ENSSSCG00000002078;ENSSSCG00000002099;ENSSSCG00000001396	K08887+K10784+K10784+K06751
Human Diseases	Endocrine and metabolic disease	Type I diabetes mellitus	3	102	0.24269	0.893465	ko04940	ENSSSCG00000002078;ENSSSCG00000002099;ENSSSCG00000001396	K10784+K10784+K06751
Metabolism	Glycan biosynthesis and metabolism	Glycosphingolipid biosynthesis - globo and isoglobo series	1	17	0.249206	0.893465	ko00603	ENSSSCG00000040556	K00718
Organismal Systems	Digestive system	Pancreatic secretion	3	104	0.251649	0.893465	ko04972	ENSSSCG00000006932;ENSSSCG00000028359;ENSSSCG00000040569	K05030+K18152+K01047
Metabolism	Nucleotide metabolism	Pyrimidine metabolism	2	58	0.252636	0.893465	ko00240	ENSSSCG00000028210;ENSSSCG00000004224	K01081+K07023
Metabolism	Glycan biosynthesis and metabolism	Other glycan degradation	1	18	0.261771	0.893465	ko00511	ENSSSCG00000021638	K12357
Metabolism	Metabolism of cofactors and vitamins	One carbon pool by folate	1	18	0.261771	0.893465	ko00670	ENSSSCG00000036208	K00600
Genetic Information Processing	Translation	mRNA surveillance pathway	3	107	0.265176	0.893465	ko03015	ENSSSCG00000007382;ENSSSCG00000029365;ENSSSCG00000040611	K13126+K14411+K14404
Environmental Information Processing	Signal transduction	Notch signaling pathway	2	61	0.271283	0.893465	ko04330	ENSSSCG00000007572;ENSSSCG00000028995	K05948+K04497
Metabolism	Energy metabolism	Nitrogen metabolism	1	19	0.274126	0.893465	ko00910	ENSSSCG00000006141	K01672
Human Diseases	Infectious disease: parasitic	Chagas disease	4	160	0.278655	0.893465	ko05142	ENSSSCG00000005284;ENSSSCG00000026592;ENSSSCG00000002078;ENSSSCG00000002099	K04636+K10169+K10784+K10784
Organismal Systems	Digestive system	Protein digestion and absorption	3	112	0.287907	0.893465	ko04974	ENSSSCG00000005380;ENSSSCG00000023322;ENSSSCG00000029323	K08135+K08131+K04897
Organismal Systems	Immune system	Toll-like receptor signaling pathway	3	113	0.292474	0.893465	ko04620	ENSSSCG00000005152;ENSSSCG00000017254;ENSSSCG00000026592	K05414+K04433+K10169
Metabolism	Lipid metabolism	Glycerolipid metabolism	2	65	0.29612	0.893465	ko00561	ENSSSCG00000014247;ENSSSCG00000001078	K14085+K13517
Human Diseases	Infectious disease: bacterial	Staphylococcus aureus infection	4	165	0.297384	0.893465	ko05150	ENSSSCG00000029990;ENSSSCG00000002078;ENSSSCG00000002099;ENSSSCG00000024914	K23125+K10784+K10784+K01335
Metabolism	Metabolism of other amino acids	Taurine and hypotaurine metabolism	1	21	0.298223	0.893465	ko00430	ENSSSCG00000015268	K00485
Human Diseases	Endocrine and metabolic disease	Insulin resistance	3	116	0.306203	0.893465	ko04931	ENSSSCG00000023915;ENSSSCG00000022797;ENSSSCG00000013241	K07191+K07189+K08536
Human Diseases	Infectious disease: bacterial	Salmonella infection	6	276	0.314437	0.893465	ko05132	ENSSSCG00000017254;ENSSSCG00000026592;ENSSSCG00000016215;ENSSSCG00000012392;ENSSSCG00000001987;ENSSSCG00000000985	K04433+K10169+K07374+K07863+K08847+K17637
Organismal Systems	Immune system	Hematopoietic cell lineage	3	119	0.319959	0.893465	ko04640	ENSSSCG00000032135;ENSSSCG00000030088;ENSSSCG00000024791	K05066+K05066+K04008
Human Diseases	Immune disease	Inflammatory bowel disease	3	119	0.319959	0.893465	ko05321	ENSSSCG00000003801;ENSSSCG00000002078;ENSSSCG00000002099	K05065+K10784+K10784
Metabolism	Lipid metabolism	Steroid hormone biosynthesis	2	69	0.320835	0.893465	ko00140	ENSSSCG00000000046;ENSSSCG00000034976	K07414+K00699
Human Diseases	Infectious disease: parasitic	Toxoplasmosis	3	120	0.324547	0.893465	ko05145	ENSSSCG00000017254;ENSSSCG00000041289;ENSSSCG00000010330	K04433+K05135+K09565
Human Diseases	Cancer: overview	Central carbon metabolism in cancer	2	70	0.326983	0.893465	ko05230	ENSSSCG00000024018;ENSSSCG00000032557	K08180+K00016
Metabolism	Lipid metabolism	alpha-Linolenic acid metabolism	1	24	0.332887	0.893465	ko00592	ENSSSCG00000040569	K01047
Human Diseases	Cancer: overview	Pathways in cancer	11	561	0.335724	0.893465	ko05200	ENSSSCG00000005152;ENSSSCG00000000884;ENSSSCG00000032135;ENSSSCG00000031736;ENSSSCG00000030088;ENSSSCG00000029838;ENSSSCG00000003801;ENSSSCG00000023929;ENSSSCG00000010610;ENSSSCG00000032003;ENSSSCG00000012885	K05414+K02084+K05066+K00799+K05066+K02235+K05065+K22182+K00799+K23790+K03068
Organismal Systems	Excretory system	Proximal tubule bicarbonate reclamation	1	25	0.344059	0.893465	ko04964	ENSSSCG00000033190	K09864
Organismal Systems	Endocrine system	Renin secretion	2	73	0.345338	0.893465	ko04924	ENSSSCG00000006932;ENSSSCG00000033190	K05030+K09864
Environmental Information Processing	Signal transduction	Ras signaling pathway	6	287	0.347079	0.893465	ko04014	ENSSSCG00000024674;ENSSSCG00000040569;ENSSSCG00000036520;ENSSSCG00000002078;ENSSSCG00000002099;ENSSSCG00000000985	K08887+K01047+K05462+K10784+K10784+K17637
Human Diseases	Infectious disease: viral	Human immunodeficiency virus 1 infection	6	287	0.347079	0.893465	ko05170	ENSSSCG00000005152;ENSSSCG00000017254;ENSSSCG00000016489;ENSSSCG00000002078;ENSSSCG00000002099;ENSSSCG00000001396	K05414+K04433+K06632+K10784+K10784+K06751
Human Diseases	Infectious disease: viral	Hepatitis C	4	179	0.350482	0.893465	ko05160	ENSSSCG00000005152;ENSSSCG00000000884;ENSSSCG00000012030;ENSSSCG00000013241	K05414+K02084+K06087+K08536
Metabolism	Global and overview maps	Biosynthesis of amino acids	2	74	0.351421	0.893465	ko01230	ENSSSCG00000026079;ENSSSCG00000036208	K00615+K00600
Organismal Systems	Digestive system	Vitamin digestion and absorption	1	26	0.355045	0.893465	ko04977	ENSSSCG00000027118	K14611
Metabolism	Carbohydrate metabolism	Butanoate metabolism	1	27	0.365848	0.907495	ko00650	ENSSSCG00000036808	K01641
Organismal Systems	Immune system	Fc epsilon RI signaling pathway	2	78	0.375553	0.907495	ko04664	ENSSSCG00000006413;ENSSSCG00000017254	K08089+K04433
Human Diseases	Cardiovascular disease	Lipid and atherosclerosis	5	241	0.376273	0.907495	ko05417	ENSSSCG00000005152;ENSSSCG00000000884;ENSSSCG00000009140;ENSSSCG00000017254;ENSSSCG00000026592	K05414+K02084+K04396+K04433+K10169
Metabolism	Carbohydrate metabolism	Pentose phosphate pathway	1	28	0.376472	0.907495	ko00030	ENSSSCG00000026079	K00615
Environmental Information Processing	Signal transduction	Calcium signaling pathway	6	302	0.392045	0.92813	ko04020	ENSSSCG00000005284;ENSSSCG00000023912;ENSSSCG00000015543;ENSSSCG00000002078;ENSSSCG00000002099;ENSSSCG00000010330	K04636+K16057+K04852+K10784+K10784+K09565
Metabolism	Carbohydrate metabolism	Pentose and glucuronate interconversions	1	30	0.397191	0.92813	ko00040	ENSSSCG00000034976	K00699
Metabolism	Glycan biosynthesis and metabolism	Glycosphingolipid biosynthesis - lacto and neolacto series	1	30	0.397191	0.92813	ko00601	ENSSSCG00000040556	K00718
Cellular Processes	Cell growth and death	p53 signaling pathway	2	83	0.40519	0.930147	ko04115	ENSSSCG00000000884;ENSSSCG00000029304	K02084+K10142
Human Diseases	Neurodegenerative disease	Pathways of neurodegeneration - multiple diseases	10	536	0.406178	0.930147	ko05022	ENSSSCG00000000884;ENSSSCG00000029838;ENSSSCG00000017254;ENSSSCG00000016215;ENSSSCG00000009648;ENSSSCG00000009649;ENSSSCG00000036438;ENSSSCG00000021355;ENSSSCG00000010330;ENSSSCG00000012885	K02084+K02235+K04433+K07374+K04573+K04572+K00432+K04565+K09565+K03068
Human Diseases	Cancer: overview	PD-L1 expression and PD-1 checkpoint pathway in cancer	3	139	0.411091	0.932079	ko05235	ENSSSCG00000017254;ENSSSCG00000002078;ENSSSCG00000002099	K04433+K10784+K10784
Cellular Processes	Transport and catabolism	Peroxisome	2	85	0.41686	0.932761	ko04146	ENSSSCG00000039244;ENSSSCG00000021355	K00477+K04565
Environmental Information Processing	Signaling molecules and interaction	Viral protein interaction with cytokine and cytokine receptor	2	86	0.422652	0.932761	ko04061	ENSSSCG00000014310;ENSSSCG00000041289	K10033+K05135
Organismal Systems	Immune system	Natural killer cell mediated cytotoxicity	3	142	0.424508	0.932761	ko04650	ENSSSCG00000032525;ENSSSCG00000035574;ENSSSCG00000005152	K07987+K07986+K05414
Metabolism	Carbohydrate metabolism	Propanoate metabolism	1	34	0.436599	0.932761	ko00640	ENSSSCG00000032557	K00016
Genetic Information Processing	Folding, sorting and degradation	SNARE interactions in vesicular transport	1	34	0.436599	0.932761	ko04130	ENSSSCG00000021238	K08486
Organismal Systems	Endocrine system	Insulin signaling pathway	3	145	0.43782	0.932761	ko04910	ENSSSCG00000023915;ENSSSCG00000022797;ENSSSCG00000011363	K07191+K07189+K04739
Human Diseases	Infectious disease: bacterial	Yersinia infection	4	203	0.441299	0.932761	ko05135	ENSSSCG00000017254;ENSSSCG00000012392;ENSSSCG00000002078;ENSSSCG00000002099	K04433+K07863+K10784+K10784
Metabolism	Glycan biosynthesis and metabolism	Mucin type O-glycan biosynthesis	1	36	0.455332	0.932761	ko00512	ENSSSCG00000014874	K00739
Human Diseases	Cancer: overview	Chemical carcinogenesis - receptor activation	4	207	0.456151	0.932761	ko05207	ENSSSCG00000031736;ENSSSCG00000028144;ENSSSCG00000034976;ENSSSCG00000010610	K00799+K22368+K00699+K00799
Organismal Systems	Endocrine system	PPAR signaling pathway	2	92	0.456765	0.932761	ko03320	ENSSSCG00000036808;ENSSSCG00000013241	K01641+K08536
Environmental Information Processing	Signaling molecules and interaction	ECM-receptor interaction	2	93	0.462338	0.932761	ko04512	ENSSSCG00000009220;ENSSSCG00000023322	K23328+K08131
Human Diseases	Infectious disease: viral	Measles	4	209	0.463529	0.932761	ko05162	ENSSSCG00000005152;ENSSSCG00000000884;ENSSSCG00000002078;ENSSSCG00000002099	K05414+K02084+K10784+K10784
Genetic Information Processing	Replication and repair	Base excision repair	1	37	0.464465	0.932761	ko03410	ENSSSCG00000045461	K10798
Human Diseases	Endocrine and metabolic disease	Alcoholic liver disease	3	152	0.468417	0.932761	ko04936	ENSSSCG00000014247;ENSSSCG00000005152;ENSSSCG00000017254	K14085+K05414+K04433
Metabolism	Amino acid metabolism	Alanine, aspartate and glutamate metabolism	1	39	0.482276	0.933474	ko00250	ENSSSCG00000013065	K13051
Metabolism	Lipid metabolism	Linoleic acid metabolism	1	40	0.49096	0.933474	ko00591	ENSSSCG00000040569	K01047
Human Diseases	Cancer: specific types	Bladder cancer	1	40	0.49096	0.933474	ko05219	ENSSSCG00000031423	K19520
Human Diseases	Infectious disease: bacterial	Pathogenic Escherichia coli infection	2	100	0.5004	0.933474	ko05130	ENSSSCG00000016215;ENSSSCG00000012030	K07374+K06087
Metabolism	Lipid metabolism	Glycerophospholipid metabolism	2	101	0.505696	0.933474	ko00564	ENSSSCG00000001078;ENSSSCG00000040569	K13517+K01047
Metabolism	Glycan biosynthesis and metabolism	Various types of N-glycan biosynthesis	1	42	0.507896	0.933474	ko00513	ENSSSCG00000033780	K09657
Cellular Processes	Cell growth and death	Apoptosis - multiple species	1	42	0.507896	0.933474	ko04215	ENSSSCG00000000884	K02084
Environmental Information Processing	Signal transduction	Rap1 signaling pathway	5	284	0.516721	0.933474	ko04015	ENSSSCG00000017254;ENSSSCG00000036520;ENSSSCG00000002078;ENSSSCG00000002099;ENSSSCG00000024088	K04433+K05462+K10784+K10784+K06271
Human Diseases	Infectious disease: viral	Human papillomavirus infection	6	345	0.518949	0.933474	ko05165	ENSSSCG00000005152;ENSSSCG00000023322;ENSSSCG00000007572;ENSSSCG00000029838;ENSSSCG00000035420;ENSSSCG00000001396	K05414+K08131+K05948+K02235+K09089+K06751
Environmental Information Processing	Signal transduction	Wnt signaling pathway	3	165	0.523172	0.933474	ko04310	ENSSSCG00000029838;ENSSSCG00000028995;ENSSSCG00000012885	K02235+K04497+K03068
Organismal Systems	Immune system	Th17 cell differentiation	3	165	0.523172	0.933474	ko04659	ENSSSCG00000003801;ENSSSCG00000002078;ENSSSCG00000002099	K05065+K10784+K10784
Environmental Information Processing	Signal transduction	MAPK signaling pathway - fly	1	44	0.524272	0.933474	ko04013	ENSSSCG00000028995	K04497
Organismal Systems	Immune system	Intestinal immune network for IgA production	2	105	0.526517	0.933474	ko04672	ENSSSCG00000002078;ENSSSCG00000002099	K10784+K10784
Environmental Information Processing	Signal transduction	mTOR signaling pathway	3	167	0.531325	0.933474	ko04150	ENSSSCG00000029838;ENSSSCG00000002714;ENSSSCG00000012885	K02235+K20409+K03068
Metabolism	Metabolism of cofactors and vitamins	Porphyrin metabolism	1	45	0.532256	0.933474	ko00860	ENSSSCG00000034976	K00699
Organismal Systems	Endocrine system	Parathyroid hormone synthesis, secretion and action	2	107	0.536705	0.933474	ko04928	ENSSSCG00000036893;ENSSSCG00000012885	K22608+K03068
Metabolism	Glycan biosynthesis and metabolism	Other types of O-glycan biosynthesis	1	48	0.555417	0.933474	ko00514	ENSSSCG00000007572	K05948
Metabolism	Lipid metabolism	Ether lipid metabolism	1	48	0.555417	0.933474	ko00565	ENSSSCG00000040569	K01047
Genetic Information Processing	Translation	Ribosome	5	297	0.556793	0.933474	ko03010	ENSSSCG00000030578;ENSSSCG00000040470;ENSSSCG00000017239;ENSSSCG00000041512;ENSSSCG00000012879	K02876+K02969+K02923+K02880+K02888
Human Diseases	Substance dependence	Cocaine addiction	1	49	0.562881	0.933474	ko05030	ENSSSCG00000022009	K01593
Human Diseases	Infectious disease: bacterial	Tuberculosis	4	238	0.565794	0.933474	ko05152	ENSSSCG00000005152;ENSSSCG00000000884;ENSSSCG00000026592;ENSSSCG00000041289	K05414+K02084+K10169+K05135
Human Diseases	Immune disease	Rheumatoid arthritis	3	176	0.567034	0.933474	ko05323	ENSSSCG00000011171;ENSSSCG00000002078;ENSSSCG00000002099	K01365+K10784+K10784
Organismal Systems	Digestive system	Fat digestion and absorption	1	51	0.577438	0.933474	ko04975	ENSSSCG00000040569	K01047
Metabolism	Glycan biosynthesis and metabolism	N-Glycan biosynthesis	1	52	0.584534	0.933474	ko00510	ENSSSCG00000032481	K09658
Human Diseases	Infectious disease: viral	Hepatitis B	3	181	0.586147	0.933474	ko05161	ENSSSCG00000005152;ENSSSCG00000000884;ENSSSCG00000017254	K05414+K02084+K04433
Human Diseases	Neurodegenerative disease	Amyotrophic lateral sclerosis	7	432	0.587543	0.933474	ko05014	ENSSSCG00000000884;ENSSSCG00000017254;ENSSSCG00000016215;ENSSSCG00000009648;ENSSSCG00000009649;ENSSSCG00000036438;ENSSSCG00000021355	K02084+K04433+K07374+K04573+K04572+K00432+K04565
Human Diseases	Cancer: overview	Transcriptional misregulation in cancer	4	245	0.588871	0.933474	ko05202	ENSSSCG00000008745;ENSSSCG00000013307;ENSSSCG00000002078;ENSSSCG00000002099	K06532+K15612+K10784+K10784
Metabolism	Lipid metabolism	Fatty acid degradation	1	53	0.591512	0.933474	ko00071	ENSSSCG00000014247	K14085
Metabolism	Amino acid metabolism	Cysteine and methionine metabolism	1	53	0.591512	0.933474	ko00270	ENSSSCG00000032557	K00016
Environmental Information Processing	Signal transduction	Sphingolipid signaling pathway	2	119	0.594639	0.933474	ko04071	ENSSSCG00000034213;ENSSSCG00000006413	K01441+K08089
Environmental Information Processing	Signal transduction	TNF signaling pathway	2	120	0.599217	0.933474	ko04668	ENSSSCG00000017254;ENSSSCG00000001987	K04433+K08847
Organismal Systems	Endocrine system	Growth hormone synthesis, secretion and action	2	120	0.599217	0.933474	ko04935	ENSSSCG00000017254;ENSSSCG00000001938	K04433+K04217
Environmental Information Processing	Signal transduction	NF-kappa B signaling pathway	3	189	0.615598	0.937349	ko04064	ENSSSCG00000025260;ENSSSCG00000002078;ENSSSCG00000002099	K20912+K10784+K10784
Human Diseases	Neurodegenerative disease	Alzheimer disease	7	444	0.616734	0.937349	ko05010	ENSSSCG00000000884;ENSSSCG00000029838;ENSSSCG00000016215;ENSSSCG00000000385;ENSSSCG00000012074;ENSSSCG00000010330;ENSSSCG00000012885	K02084+K02235+K07374+K14711+K07747+K09565+K03068
Human Diseases	Infectious disease: viral	Human cytomegalovirus infection	4	255	0.620579	0.937349	ko05163	ENSSSCG00000005152;ENSSSCG00000017254;ENSSSCG00000041289;ENSSSCG00000001396	K05414+K04433+K05135+K06751
Organismal Systems	Nervous system	Serotonergic synapse	2	125	0.621527	0.937349	ko04726	ENSSSCG00000022009;ENSSSCG00000000046	K01593+K07414
Human Diseases	Infectious disease: parasitic	Malaria	2	126	0.625873	0.937349	ko05144	ENSSSCG00000002078;ENSSSCG00000002099	K10784+K10784
Human Diseases	Neurodegenerative disease	Parkinson disease	5	323	0.63171	0.937349	ko05012	ENSSSCG00000000884;ENSSSCG00000016215;ENSSSCG00000000385;ENSSSCG00000021355;ENSSSCG00000010330	K02084+K07374+K14711+K04565+K09565
Cellular Processes	Cell growth and death	Necroptosis	3	194	0.633281	0.937349	ko04217	ENSSSCG00000005152;ENSSSCG00000001987;ENSSSCG00000005203	K05414+K08847+K12967
Environmental Information Processing	Signal transduction	AMPK signaling pathway	2	128	0.63445	0.937349	ko04152	ENSSSCG00000023915;ENSSSCG00000014080	K07191+K00021
Organismal Systems	Aging	Longevity regulating pathway - multiple species	1	62	0.6493	0.953139	ko04213	ENSSSCG00000021355	K04565
Human Diseases	Cancer: specific types	Basal cell carcinoma	1	63	0.655196	0.953799	ko05217	ENSSSCG00000029838	K02235
Environmental Information Processing	Signal transduction	FoxO signaling pathway	2	135	0.663268	0.953799	ko04068	ENSSSCG00000035074;ENSSSCG00000023915	K17847+K07191
Cellular Processes	Cell growth and death	Ferroptosis	1	66	0.672302	0.953799	ko04216	ENSSSCG00000029304	K10142
Organismal Systems	Endocrine system	GnRH secretion	1	66	0.672302	0.953799	ko04929	ENSSSCG00000042162	K05004
Organismal Systems	Development and regeneration	Osteoclast differentiation	2	138	0.675052	0.953799	ko04380	ENSSSCG00000017254;ENSSSCG00000027665	K04433+K06551
Metabolism	Amino acid metabolism	Lysine degradation	1	67	0.677814	0.953799	ko00310	ENSSSCG00000014247	K14085
Organismal Systems	Immune system	Th1 and Th2 cell differentiation	2	139	0.678905	0.953799	ko04658	ENSSSCG00000002078;ENSSSCG00000002099	K10784+K10784
Human Diseases	Substance dependence	Amphetamine addiction	1	70	0.693804	0.967359	ko05031	ENSSSCG00000022009	K01593
Human Diseases	Infectious disease: viral	Kaposi sarcoma-associated herpesvirus infection	3	217	0.70729	0.967359	ko05167	ENSSSCG00000005152;ENSSSCG00000017254;ENSSSCG00000001396	K05414+K04433+K06751
Organismal Systems	Digestive system	Mineral absorption	1	73	0.709004	0.967359	ko04978	ENSSSCG00000012437	K17686
Organismal Systems	Circulatory system	Vascular smooth muscle contraction	2	148	0.711939	0.967359	ko04270	ENSSSCG00000013408;ENSSSCG00000040569	K12333+K01047
Human Diseases	Cancer: specific types	Breast cancer	2	148	0.711939	0.967359	ko05224	ENSSSCG00000029838;ENSSSCG00000012885	K02235+K03068
Metabolism	Carbohydrate metabolism	Inositol phosphate metabolism	1	74	0.713903	0.967359	ko00562	ENSSSCG00000012315	K20279
Human Diseases	Neurodegenerative disease	Huntington disease	5	362	0.728662	0.972705	ko05016	ENSSSCG00000000884;ENSSSCG00000016215;ENSSSCG00000036438;ENSSSCG00000021355;ENSSSCG00000010330	K02084+K07374+K00432+K04565+K09565
Organismal Systems	Immune system	T cell receptor signaling pathway	2	154	0.732356	0.972705	ko04660	ENSSSCG00000002078;ENSSSCG00000002099	K10784+K10784
Human Diseases	Infectious disease: viral	Human T-cell leukemia virus 1 infection	4	296	0.733831	0.972705	ko05166	ENSSSCG00000002078;ENSSSCG00000002099;ENSSSCG00000001396;ENSSSCG00000024088	K10784+K10784+K06751+K06271
Organismal Systems	Immune system	RIG-I-like receptor signaling pathway	1	80	0.741619	0.972705	ko04622	ENSSSCG00000005152	K05414
Genetic Information Processing	Folding, sorting and degradation	RNA degradation	1	81	0.745972	0.972705	ko03018	ENSSSCG00000007382	K13126
Genetic Information Processing	Folding, sorting and degradation	Ubiquitin mediated proteolysis	2	159	0.748426	0.972705	ko04120	ENSSSCG00000009860;ENSSSCG00000009638	K10264+K07868
Organismal Systems	Endocrine system	Adipocytokine signaling pathway	1	82	0.750251	0.972705	ko04920	ENSSSCG00000023915	K07191
Organismal Systems	Nervous system	Synaptic vesicle cycle	1	83	0.754459	0.972705	ko04721	ENSSSCG00000021238	K08486
Environmental Information Processing	Signal transduction	ErbB signaling pathway	1	86	0.766666	0.972705	ko04012	ENSSSCG00000024674	K08887
Cellular Processes	Cell growth and death	Cellular senescence	2	167	0.772423	0.972705	ko04218	ENSSSCG00000017254;ENSSSCG00000001396	K04433+K06751
Human Diseases	Infectious disease: viral	Herpes simplex virus 1 infection	6	452	0.772964	0.972705	ko05168	ENSSSCG00000005152;ENSSSCG00000000884;ENSSSCG00000031589;ENSSSCG00000001396;ENSSSCG00000011292;ENSSSCG00000034545	K05414+K02084+K09228+K06751+K09228+K09228
Organismal Systems	Endocrine system	Insulin secretion	1	88	0.774466	0.972705	ko04911	ENSSSCG00000042162	K05004
Cellular Processes	Cellular community - eukaryotes	Gap junction	1	89	0.778268	0.972705	ko04540	ENSSSCG00000016215	K07374
Human Diseases	Infectious disease: bacterial	Bacterial invasion of epithelial cells	1	91	0.785683	0.972705	ko05100	ENSSSCG00000012392	K07863
Organismal Systems	Endocrine system	GnRH signaling pathway	1	93	0.792852	0.972705	ko04912	ENSSSCG00000017254	K04433
Human Diseases	Infectious disease: bacterial	Legionellosis	1	95	0.799782	0.972705	ko05134	ENSSSCG00000000884	K02084
Genetic Information Processing	Replication and repair	Homologous recombination	1	96	0.80316	0.972705	ko03440	ENSSSCG00000045084	K20773
Cellular Processes	Cellular community - eukaryotes	Tight junction	2	179	0.804692	0.972705	ko04530	ENSSSCG00000016215;ENSSSCG00000012030	K07374+K06087
Human Diseases	Neurodegenerative disease	Prion disease	4	329	0.805135	0.972705	ko05020	ENSSSCG00000000884;ENSSSCG00000016215;ENSSSCG00000021355;ENSSSCG00000010330	K02084+K07374+K04565+K09565
Environmental Information Processing	Signal transduction	Phosphatidylinositol signaling system	1	99	0.812958	0.972705	ko04070	ENSSSCG00000012315	K20279
Organismal Systems	Digestive system	Salivary secretion	1	100	0.816115	0.972705	ko04970	ENSSSCG00000028359	K18152
Human Diseases	Infectious disease: viral	Coronavirus disease - COVID-19	5	408	0.817836	0.972705	ko05171	ENSSSCG00000005152;ENSSSCG00000040470;ENSSSCG00000017239;ENSSSCG00000041512;ENSSSCG00000024914	K05414+K02969+K02923+K02880+K01335
Human Diseases	Cancer: specific types	Prostate cancer	1	101	0.81922	0.972705	ko05215	ENSSSCG00000032003	K23790
Human Diseases	Immune disease	Systemic lupus erythematosus	2	190	0.830655	0.972705	ko05322	ENSSSCG00000002078;ENSSSCG00000002099	K10784+K10784
Organismal Systems	Endocrine system	Melanogenesis	1	106	0.833977	0.972705	ko04916	ENSSSCG00000029838	K02235
Organismal Systems	Endocrine system	Glucagon signaling pathway	1	106	0.833977	0.972705	ko04922	ENSSSCG00000032557	K00016
Organismal Systems	Immune system	NOD-like receptor signaling pathway	2	192	0.83503	0.972705	ko04621	ENSSSCG00000005152;ENSSSCG00000001987	K05414+K08847
Human Diseases	Cancer: specific types	Small cell lung cancer	1	107	0.836781	0.972705	ko05222	ENSSSCG00000000884	K02084
Environmental Information Processing	Signaling molecules and interaction	Neuroactive ligand-receptor interaction	4	360	0.857312	0.97723	ko04080	ENSSSCG00000013408;ENSSSCG00000038057;ENSSSCG00000001938;ENSSSCG00000005216	K12333+K05241+K04217+K21998
Cellular Processes	Cellular community - eukaryotes	Focal adhesion	2	205	0.861071	0.97723	ko04510	ENSSSCG00000023322;ENSSSCG00000024088	K08131+K06271
Human Diseases	Cancer: specific types	Gastric cancer	2	207	0.864728	0.97723	ko05226	ENSSSCG00000029838;ENSSSCG00000012885	K02235+K03068
Environmental Information Processing	Signal transduction	HIF-1 signaling pathway	1	123	0.875753	0.97723	ko04066	ENSSSCG00000032557	K00016
Organismal Systems	Sensory system	Inflammatory mediator regulation of TRP channels	1	124	0.877856	0.97723	ko04750	ENSSSCG00000017254	K04433
Human Diseases	Cancer: overview	Proteoglycans in cancer	2	215	0.878497	0.97723	ko05205	ENSSSCG00000029838;ENSSSCG00000011171	K02235+K01365
Environmental Information Processing	Signal transduction	MAPK signaling pathway	3	298	0.879573	0.97723	ko04010	ENSSSCG00000017254;ENSSSCG00000015543;ENSSSCG00000036520	K04433+K04852+K05462
Organismal Systems	Immune system	Platelet activation	1	125	0.879923	0.97723	ko04611	ENSSSCG00000024088	K06271
Cellular Processes	Cell growth and death	Cell cycle	1	134	0.897031	0.97723	ko04110	ENSSSCG00000016489	K06632
Organismal Systems	Endocrine system	Relaxin signaling pathway	1	134	0.897031	0.97723	ko04926	ENSSSCG00000005216	K21998
Organismal Systems	Nervous system	Dopaminergic synapse	1	139	0.905465	0.97723	ko04728	ENSSSCG00000022009	K01593
Environmental Information Processing	Signal transduction	cAMP signaling pathway	2	237	0.909995	0.97723	ko04024	ENSSSCG00000001938;ENSSSCG00000036427	K04217+K04328
Organismal Systems	Immune system	Leukocyte transendothelial migration	1	144	0.913211	0.97723	ko04670	ENSSSCG00000012030	K06087
Cellular Processes	Cellular community - eukaryotes	Signaling pathways regulating pluripotency of stem cells	1	146	0.91613	0.97723	ko04550	ENSSSCG00000029838	K02235
Cellular Processes	Transport and catabolism	Autophagy - animal	1	152	0.924315	0.97723	ko04140	ENSSSCG00000011171	K01365
Cellular Processes	Transport and catabolism	Endocytosis	2	251	0.925892	0.97723	ko04144	ENSSSCG00000027226;ENSSSCG00000001396	K12471+K06751
Human Diseases	Cardiovascular disease	Diabetic cardiomyopathy	2	254	0.928938	0.97723	ko05415	ENSSSCG00000023915;ENSSSCG00000010330	K07191+K09565
Human Diseases	Neurodegenerative disease	Spinocerebellar ataxia	1	160	0.934006	0.97723	ko05017	ENSSSCG00000010330	K09565
Human Diseases	Endocrine and metabolic disease	Cushing syndrome	1	163	0.937313	0.97723	ko04934	ENSSSCG00000029838	K02235
Environmental Information Processing	Signal transduction	Phospholipase D signaling pathway	1	165	0.939425	0.97723	ko04072	ENSSSCG00000006413	K08089
Human Diseases	Cancer: overview	MicroRNAs in cancer	1	166	0.940455	0.97723	ko05206	ENSSSCG00000036520	K05462
Environmental Information Processing	Signal transduction	cGMP-PKG signaling pathway	1	173	0.947191	0.97723	ko04022	ENSSSCG00000010330	K09565
Environmental Information Processing	Signal transduction	Hippo signaling pathway	1	180	0.95317	0.97723	ko04390	ENSSSCG00000029838	K02235
Environmental Information Processing	Signal transduction	PI3K-Akt signaling pathway	3	380	0.956137	0.97723	ko04151	ENSSSCG00000005152;ENSSSCG00000023322;ENSSSCG00000036520	K05414+K08131+K05462
Organismal Systems	Development and regeneration	Axon guidance	1	184	0.956279	0.97723	ko04360	ENSSSCG00000036520	K05462
Organismal Systems	Immune system	Chemokine signaling pathway	1	188	0.959183	0.97723	ko04062	ENSSSCG00000014310	K10033
Human Diseases	Substance dependence	Alcoholism	1	189	0.959878	0.97723	ko05034	ENSSSCG00000022009	K01593
Human Diseases	Infectious disease: parasitic	Amoebiasis	1	192	0.961895	0.97723	ko05146	ENSSSCG00000005284	K04636
Human Diseases	Endocrine and metabolic disease	Non-alcoholic fatty liver disease	1	196	0.964428	0.97723	ko04932	ENSSSCG00000013241	K08536
Human Diseases	Cancer: overview	Viral carcinogenesis	1	207	0.970563	0.979114	ko05203	ENSSSCG00000001396	K06751
Organismal Systems	Immune system	Neutrophil extracellular trap formation	1	225	0.978415	0.982707	ko04613	ENSSSCG00000010330	K09565
Organismal Systems	Sensory system	Olfactory transduction	1	1500	1	1	ko04740	ENSSSCG00000002450	K13752

## Sheet: GO
Supplementary Table S6: GO functional enrichment of 482 482 candidate genes for coarse feeding tolerance in the Turquoise module.
GO:0019842	vitamin binding	MF	10	122	8.73163e-05	0.0694165	ENSSSCG00000005199;ENSSSCG00000010826;ENSSSCG00000015462;ENSSSCG00000022009;ENSSSCG00000025953;ENSSSCG00000026079;ENSSSCG00000029945;ENSSSCG00000034758;ENSSSCG00000036208;ENSSSCG00000039244
GO:0016209	antioxidant activity	MF	7	67	0.000227908	0.0905932	ENSSSCG00000010610;ENSSSCG00000011169;ENSSSCG00000021355;ENSSSCG00000023298;ENSSSCG00000023929;ENSSSCG00000031736;ENSSSCG00000036438
GO:0006959	humoral immune response	BP	13	176	2.54131e-05	0.0961887	ENSSSCG00000005152;ENSSSCG00000007384;ENSSSCG00000010334;ENSSSCG00000014310;ENSSSCG00000024791;ENSSSCG00000024914;ENSSSCG00000029879;ENSSSCG00000029990;ENSSSCG00000031075;ENSSSCG00000034792;ENSSSCG00000035170;ENSSSCG00000036007;ENSSSCG00000040998
GO:0030170	pyridoxal phosphate binding	MF	6	56	0.00055907	0.111115	ENSSSCG00000005199;ENSSSCG00000010826;ENSSSCG00000022009;ENSSSCG00000029945;ENSSSCG00000034758;ENSSSCG00000036208
GO:0070279	vitamin B6 binding	MF	6	56	0.00055907	0.111115	ENSSSCG00000005199;ENSSSCG00000010826;ENSSSCG00000022009;ENSSSCG00000029945;ENSSSCG00000034758;ENSSSCG00000036208
GO:0071914	prominosome	CC	2	2	0.000335186	0.117452	ENSSSCG00000008118;ENSSSCG00000008745
GO:0005576	extracellular region	CC	50	1697	0.000530258	0.117452	ENSSSCG00000001396;ENSSSCG00000002479;ENSSSCG00000003146;ENSSSCG00000004233;ENSSSCG00000004928;ENSSSCG00000005152;ENSSSCG00000005203;ENSSSCG00000005216;ENSSSCG00000005380;ENSSSCG00000006051;ENSSSCG00000007079;ENSSSCG00000007384;ENSSSCG00000007760;ENSSSCG00000007814;ENSSSCG00000008072;ENSSSCG00000008118;ENSSSCG00000008745;ENSSSCG00000011727;ENSSSCG00000011850;ENSSSCG00000013408;ENSSSCG00000014310;…
GO:0001895	retina homeostasis	BP	6	41	0.000100918	0.123024	ENSSSCG00000000920;ENSSSCG00000008745;ENSSSCG00000021355;ENSSSCG00000023162;ENSSSCG00000029843;ENSSSCG00000040416
GO:1990748	cellular detoxification	BP	8	83	0.000151026	0.123024	ENSSSCG00000010610;ENSSSCG00000010826;ENSSSCG00000011169;ENSSSCG00000021355;ENSSSCG00000023298;ENSSSCG00000023929;ENSSSCG00000031736;ENSSSCG00000036438
GO:0097237	cellular response to toxic substance	BP	8	88	0.000227208	0.123024	ENSSSCG00000010610;ENSSSCG00000010826;ENSSSCG00000011169;ENSSSCG00000021355;ENSSSCG00000023298;ENSSSCG00000023929;ENSSSCG00000031736;ENSSSCG00000036438
GO:0019730	antimicrobial humoral response	BP	7	69	0.000284444	0.123024	ENSSSCG00000007384;ENSSSCG00000010334;ENSSSCG00000014310;ENSSSCG00000029879;ENSSSCG00000029990;ENSSSCG00000034792;ENSSSCG00000040998
GO:1901606	alpha-amino acid catabolic process	BP	7	70	0.000311103	0.123024	ENSSSCG00000005199;ENSSSCG00000013065;ENSSSCG00000029945;ENSSSCG00000033636;ENSSSCG00000036208;ENSSSCG00000038660;ENSSSCG00000040203
GO:0019731	antibacterial humoral response	BP	5	33	0.000329178	0.123024	ENSSSCG00000007384;ENSSSCG00000010334;ENSSSCG00000029879;ENSSSCG00000029990;ENSSSCG00000034792
GO:0098869	cellular oxidant detoxification	BP	7	71	0.000339731	0.123024	ENSSSCG00000010610;ENSSSCG00000011169;ENSSSCG00000021355;ENSSSCG00000023298;ENSSSCG00000023929;ENSSSCG00000031736;ENSSSCG00000036438
GO:0032771	regulation of tyrosinase activity	BP	2	2	0.000342795	0.123024	ENSSSCG00000012437;ENSSSCG00000023162
GO:0032773	positive regulation of tyrosinase activity	BP	2	2	0.000342795	0.123024	ENSSSCG00000012437;ENSSSCG00000023162
GO:0098754	detoxification	BP	8	94	0.000357533	0.123024	ENSSSCG00000010610;ENSSSCG00000010826;ENSSSCG00000011169;ENSSSCG00000021355;ENSSSCG00000023298;ENSSSCG00000023929;ENSSSCG00000031736;ENSSSCG00000036438
GO:0019748	secondary metabolic process	BP	5	35	0.000436818	0.13778	ENSSSCG00000000046;ENSSSCG00000012409;ENSSSCG00000012437;ENSSSCG00000015268;ENSSSCG00000023162
GO:0009636	response to toxic substance	BP	9	127	0.00060502	0.176154	ENSSSCG00000010610;ENSSSCG00000010826;ENSSSCG00000011169;ENSSSCG00000021355;ENSSSCG00000022009;ENSSSCG00000023298;ENSSSCG00000023929;ENSSSCG00000031736;ENSSSCG00000036438
GO:0006720	isoprenoid metabolic process	BP	7	80	0.00070428	0.177816	ENSSSCG00000000046;ENSSSCG00000014080;ENSSSCG00000015930;ENSSSCG00000025578;ENSSSCG00000032481;ENSSSCG00000036808;ENSSSCG00000039244
GO:0044281	small molecule metabolic process	BP	43	1402	0.000742559	0.177816	ENSSSCG00000000046;ENSSSCG00000002504;ENSSSCG00000002557;ENSSSCG00000004233;ENSSSCG00000005199;ENSSSCG00000005627;ENSSSCG00000010610;ENSSSCG00000010826;ENSSSCG00000011169;ENSSSCG00000012315;ENSSSCG00000012885;ENSSSCG00000013065;ENSSSCG00000013241;ENSSSCG00000014080;ENSSSCG00000014411;ENSSSCG00000015268;ENSSSCG00000015462;ENSSSCG00000015930;ENSSSCG00000021355;ENSSSCG00000022009;ENSSSCG00000022797;…
GO:1901615	organic hydroxy compound metabolic process	BP	17	379	0.000751666	0.177816	ENSSSCG00000000046;ENSSSCG00000012315;ENSSSCG00000012409;ENSSSCG00000012437;ENSSSCG00000012589;ENSSSCG00000012885;ENSSSCG00000014080;ENSSSCG00000015462;ENSSSCG00000015930;ENSSSCG00000021355;ENSSSCG00000022009;ENSSSCG00000023162;ENSSSCG00000032481;ENSSSCG00000032557;ENSSSCG00000034213;ENSSSCG00000034758;ENSSSCG00000036808
GO:0042592	homeostatic process	BP	42	1366	0.000817942	0.182112	ENSSSCG00000000135;ENSSSCG00000000385;ENSSSCG00000000920;ENSSSCG00000001987;ENSSSCG00000002450;ENSSSCG00000002906;ENSSSCG00000007492;ENSSSCG00000008002;ENSSSCG00000008745;ENSSSCG00000009524;ENSSSCG00000010188;ENSSSCG00000010334;ENSSSCG00000010772;ENSSSCG00000012386;ENSSSCG00000012437;ENSSSCG00000012885;ENSSSCG00000013241;ENSSSCG00000015136;ENSSSCG00000015268;ENSSSCG00000015543;ENSSSCG00000017254;…
GO:0033693	neurofilament bundle assembly	BP	2	3	0.00101575	0.183077	ENSSSCG00000009648;ENSSSCG00000009649
GO:0042904	9-cis-retinoic acid biosynthetic process	BP	2	3	0.00101575	0.183077	ENSSSCG00000015930;ENSSSCG00000025578
GO:0042905	9-cis-retinoic acid metabolic process	BP	2	3	0.00101575	0.183077	ENSSSCG00000015930;ENSSSCG00000025578
GO:0043932	ossification involved in bone remodeling	BP	2	3	0.00101575	0.183077	ENSSSCG00000006051;ENSSSCG00000016522
GO:0033690	positive regulation of osteoblast proliferation	BP	3	12	0.00122721	0.201154	ENSSSCG00000006051;ENSSSCG00000012885;ENSSSCG00000029879
GO:0008299	isoprenoid biosynthetic process	BP	4	26	0.00125653	0.201154	ENSSSCG00000014080;ENSSSCG00000015930;ENSSSCG00000025578;ENSSSCG00000036808
GO:0061844	antimicrobial humoral immune response mediated by antimicrobial peptide	BP	5	44	0.00127548	0.201154	ENSSSCG00000014310;ENSSSCG00000029879;ENSSSCG00000029990;ENSSSCG00000034792;ENSSSCG00000040998
GO:0005615	extracellular space	CC	36	1167	0.00155034	0.228933	ENSSSCG00000001396;ENSSSCG00000002479;ENSSSCG00000004233;ENSSSCG00000004928;ENSSSCG00000005152;ENSSSCG00000005203;ENSSSCG00000005380;ENSSSCG00000006051;ENSSSCG00000007079;ENSSSCG00000007384;ENSSSCG00000008072;ENSSSCG00000008745;ENSSSCG00000011727;ENSSSCG00000011850;ENSSSCG00000013408;ENSSSCG00000014310;ENSSSCG00000015540;ENSSSCG00000016522;ENSSSCG00000021355;ENSSSCG00000023322;ENSSSCG00000023915;…
GO:0016114	terpenoid biosynthetic process	BP	3	13	0.00157357	0.229076	ENSSSCG00000015930;ENSSSCG00000025578;ENSSSCG00000036808
GO:0060712	spongiotrophoblast layer development	BP	3	13	0.00157357	0.229076	ENSSSCG00000009860;ENSSSCG00000012409;ENSSSCG00000013408
GO:0097001	ceramide binding	MF	3	13	0.00154656	0.232609	ENSSSCG00000002921;ENSSSCG00000016682;ENSSSCG00000020963
GO:0004029	aldehyde dehydrogenase (NAD+) activity	MF	3	14	0.00194163	0.232609	ENSSSCG00000014247;ENSSSCG00000025578;ENSSSCG00000028501
GO:0015144	carbohydrate transmembrane transporter activity	MF	4	32	0.00270997	0.232609	ENSSSCG00000023915;ENSSSCG00000024058;ENSSSCG00000027118;ENSSSCG00000033190
GO:0004030	aldehyde dehydrogenase [NAD(P)+] activity	MF	3	16	0.00290672	0.232609	ENSSSCG00000014247;ENSSSCG00000025578;ENSSSCG00000028501
GO:0051861	glycolipid binding	MF	3	16	0.00290672	0.232609	ENSSSCG00000002921;ENSSSCG00000016682;ENSSSCG00000020963
GO:0035594	ganglioside binding	MF	2	5	0.00326461	0.232609	ENSSSCG00000002921;ENSSSCG00000020963
GO:0046625	sphingolipid binding	MF	3	17	0.00348182	0.232609	ENSSSCG00000002921;ENSSSCG00000016682;ENSSSCG00000020963
GO:0043208	glycosphingolipid binding	MF	2	6	0.0048374	0.232609	ENSSSCG00000002921;ENSSSCG00000020963
GO:0016491	oxidoreductase activity	MF	23	708	0.00624722	0.232609	ENSSSCG00000000046;ENSSSCG00000005199;ENSSSCG00000005859;ENSSSCG00000009225;ENSSSCG00000010610;ENSSSCG00000010826;ENSSSCG00000014080;ENSSSCG00000014247;ENSSSCG00000015268;ENSSSCG00000015930;ENSSSCG00000020706;ENSSSCG00000021355;ENSSSCG00000023298;ENSSSCG00000023929;ENSSSCG00000025578;ENSSSCG00000025953;ENSSSCG00000028501;ENSSSCG00000029304;ENSSSCG00000031736;ENSSSCG00000032557;ENSSSCG00000036438;…
GO:0015145	monosaccharide transmembrane transporter activity	MF	3	21	0.00644962	0.232609	ENSSSCG00000023915;ENSSSCG00000024058;ENSSSCG00000027118
GO:0051119	sugar transmembrane transporter activity	MF	3	21	0.00644962	0.232609	ENSSSCG00000023915;ENSSSCG00000024058;ENSSSCG00000027118
GO:0004869	cysteine-type endopeptidase inhibitor activity	MF	4	43	0.00794022	0.232609	ENSSSCG00000012960;ENSSSCG00000028871;ENSSSCG00000029879;ENSSSCG00000032423
GO:0003785	actin monomer binding	MF	3	24	0.00942412	0.232609	ENSSSCG00000012517;ENSSSCG00000015632;ENSSSCG00000028695
GO:0003824	catalytic activity	MF	119	5383	0.00954703	0.232609	ENSSSCG00000000046;ENSSSCG00000000139;ENSSSCG00000000853;ENSSSCG00000000884;ENSSSCG00000001073;ENSSSCG00000001078;ENSSSCG00000001987;ENSSSCG00000002144;ENSSSCG00000002469;ENSSSCG00000002504;ENSSSCG00000002557;ENSSSCG00000002967;ENSSSCG00000003913;ENSSSCG00000004224;ENSSSCG00000004233;ENSSSCG00000004364;ENSSSCG00000004869;ENSSSCG00000005199;ENSSSCG00000005284;ENSSSCG00000005615;ENSSSCG00000005627;…
GO:0004364	glutathione transferase activity	MF	3	26	0.0117832	0.232609	ENSSSCG00000010610;ENSSSCG00000031736;ENSSSCG00000032003
GO:0017147	Wnt-protein binding	MF	3	27	0.0130784	0.232609	ENSSSCG00000006051;ENSSSCG00000012885;ENSSSCG00000029838
GO:1901681	sulfur compound binding	MF	8	172	0.0145756	0.232609	ENSSSCG00000001073;ENSSSCG00000015462;ENSSSCG00000016522;ENSSSCG00000021598;ENSSSCG00000026079;ENSSSCG00000029879;ENSSSCG00000031736;ENSSSCG00000037559
GO:0001846	opsonin binding	MF	2	11	0.0166897	0.232609	ENSSSCG00000011727;ENSSSCG00000035170
GO:0001848	complement binding	MF	2	11	0.0166897	0.232609	ENSSSCG00000011727;ENSSSCG00000035170
GO:0004017	adenylate kinase activity	MF	2	11	0.0166897	0.232609	ENSSSCG00000002504;ENSSSCG00000005627
GO:0000334	3-hydroxyanthranilate 3,4-dioxygenase activity	MF	1	1	0.0184332	0.232609	ENSSSCG00000038660
GO:0002953	5'-deoxynucleotidase activity	MF	1	1	0.0184332	0.232609	ENSSSCG00000004224
GO:0003923	GPI-anchor transamidase activity	MF	1	1	0.0184332	0.232609	ENSSSCG00000038329
GO:0003943	N-acetylgalactosamine-4-sulfatase activity	MF	1	1	0.0184332	0.232609	ENSSSCG00000038535
GO:0004028	3-chloroallyl aldehyde dehydrogenase activity	MF	1	1	0.0184332	0.232609	ENSSSCG00000025578
GO:0004058	aromatic-L-amino-acid decarboxylase activity	MF	1	1	0.0184332	0.232609	ENSSSCG00000022009
GO:0004061	arylformamidase activity	MF	1	1	0.0184332	0.232609	ENSSSCG00000033636
GO:0004375	glycine dehydrogenase (decarboxylating) activity	MF	1	1	0.0184332	0.232609	ENSSSCG00000005199
GO:0004420	hydroxymethylglutaryl-CoA reductase (NADPH) activity	MF	1	1	0.0184332	0.232609	ENSSSCG00000014080
GO:0004788	thiamine diphosphokinase activity	MF	1	1	0.0184332	0.232609	ENSSSCG00000015462
GO:0005169	neurotrophin TRKB receptor binding	MF	1	1	0.0184332	0.232609	ENSSSCG00000036520
GO:0008119	thiopurine S-methyltransferase activity	MF	1	1	0.0184332	0.232609	ENSSSCG00000001073
GO:0008478	pyridoxal kinase activity	MF	1	1	0.0184332	0.232609	ENSSSCG00000034758
GO:0008798	beta-aspartyl-peptidase activity	MF	1	1	0.0184332	0.232609	ENSSSCG00000013065
GO:0008890	glycine C-acetyltransferase activity	MF	1	1	0.0184332	0.232609	ENSSSCG00000029945
GO:0015390	purine-specific nucleoside:sodium symporter activity	MF	1	1	0.0184332	0.232609	ENSSSCG00000010960
GO:0015650	lactate:proton symporter activity	MF	1	1	0.0184332	0.232609	ENSSSCG00000024018
GO:0016642	oxidoreductase activity, acting on the CH-NH2 group of donors, disulfide as acceptor	MF	1	1	0.0184332	0.232609	ENSSSCG00000005199
GO:0017089	glycolipid transfer activity	MF	1	1	0.0184332	0.232609	ENSSSCG00000016682
GO:0030184	nitric oxide transmembrane transporter activity	MF	1	1	0.0184332	0.232609	ENSSSCG00000033190
GO:0030975	thiamine binding	MF	1	1	0.0184332	0.232609	ENSSSCG00000015462
GO:0031700	adrenomedullin receptor binding	MF	1	1	0.0184332	0.232609	ENSSSCG00000013408
GO:0032767	copper-dependent protein binding	MF	1	1	0.0184332	0.232609	ENSSSCG00000012437
GO:0033971	hydroxyisourate hydrolase activity	MF	1	1	0.0184332	0.232609	ENSSSCG00000029761
GO:0034722	gamma-glutamyl-peptidase activity	MF	1	1	0.0184332	0.232609	ENSSSCG00000037637
GO:0035379	carbon dioxide transmembrane transporter activity	MF	1	1	0.0184332	0.232609	ENSSSCG00000033190
GO:0036468	L-dopa decarboxylase activity	MF	1	1	0.0184332	0.232609	ENSSSCG00000022009
GO:0043878	glyceraldehyde-3-phosphate dehydrogenase (NAD+) (non-phosphorylating) activity	MF	1	1	0.0184332	0.232609	ENSSSCG00000014247
GO:0048244	phytanoyl-CoA dioxygenase activity	MF	1	1	0.0184332	0.232609	ENSSSCG00000039244
GO:0061811	ADP-ribosyl cyclase activity	MF	1	1	0.0184332	0.232609	ENSSSCG00000028359
GO:0061812	cyclic ADP-ribose hydrolase	MF	1	1	0.0184332	0.232609	ENSSSCG00000028359
GO:0062186	anandamide epoxidase activity	MF	1	1	0.0184332	0.232609	ENSSSCG00000000046
GO:0062187	anandamide 8,9 epoxidase activity	MF	1	1	0.0184332	0.232609	ENSSSCG00000000046
GO:0062188	anandamide 11,12 epoxidase activity	MF	1	1	0.0184332	0.232609	ENSSSCG00000000046
GO:0062189	anandamide 14,15 epoxidase activity	MF	1	1	0.0184332	0.232609	ENSSSCG00000000046
GO:0070037	rRNA (pseudouridine) methyltransferase activity	MF	1	1	0.0184332	0.232609	ENSSSCG00000026812
GO:0120225	coenzyme A binding	MF	1	1	0.0184332	0.232609	ENSSSCG00000014080
GO:0140581	P-type monovalent copper transporter activity	MF	1	1	0.0184332	0.232609	ENSSSCG00000012437
GO:1990175	EH domain binding	MF	1	1	0.0184332	0.232609	ENSSSCG00000027226
GO:0009063	cellular amino acid catabolic process	BP	7	93	0.00171255	0.240074	ENSSSCG00000005199;ENSSSCG00000013065;ENSSSCG00000029945;ENSSSCG00000033636;ENSSSCG00000036208;ENSSSCG00000038660;ENSSSCG00000040203
GO:0005215	transporter activity	MF	31	1141	0.0195281	0.242003	ENSSSCG00000000385;ENSSSCG00000002450;ENSSSCG00000004701;ENSSSCG00000006932;ENSSSCG00000010188;ENSSSCG00000010960;ENSSSCG00000011230;ENSSSCG00000011641;ENSSSCG00000012386;ENSSSCG00000012394;ENSSSCG00000012437;ENSSSCG00000015543;ENSSSCG00000015949;ENSSSCG00000016517;ENSSSCG00000016682;ENSSSCG00000017208;ENSSSCG00000017256;ENSSSCG00000017925;ENSSSCG00000017926;ENSSSCG00000023912;ENSSSCG00000023915;…
GO:0070402	NADPH binding	MF	2	12	0.0197864	0.242003	ENSSSCG00000005859;ENSSSCG00000014080
GO:0008233	peptidase activity	MF	19	616	0.0202147	0.243495	ENSSSCG00000000884;ENSSSCG00000002469;ENSSSCG00000002967;ENSSSCG00000004869;ENSSSCG00000006932;ENSSSCG00000007760;ENSSSCG00000009140;ENSSSCG00000010772;ENSSSCG00000011157;ENSSSCG00000011171;ENSSSCG00000012074;ENSSSCG00000013065;ENSSSCG00000024914;ENSSSCG00000029879;ENSSSCG00000033116;ENSSSCG00000034792;ENSSSCG00000035337;ENSSSCG00000037637;ENSSSCG00000038329
GO:0044362	negative regulation of molecular function in other organism	BP	2	4	0.00200658	0.244997	ENSSSCG00000010334;ENSSSCG00000011727
GO:0048550	negative regulation of pinocytosis	BP	2	4	0.00200658	0.244997	ENSSSCG00000008118;ENSSSCG00000013241
GO:0052204	negative regulation of molecular function in other organism involved in symbiotic interaction	BP	2	4	0.00200658	0.244997	ENSSSCG00000010334;ENSSSCG00000011727
GO:0052403	negative regulation by host of symbiont catalytic activity	BP	2	4	0.00200658	0.244997	ENSSSCG00000010334;ENSSSCG00000011727
GO:0022857	transmembrane transporter activity	MF	29	1056	0.0207269	0.245938	ENSSSCG00000000385;ENSSSCG00000002450;ENSSSCG00000004701;ENSSSCG00000006932;ENSSSCG00000010188;ENSSSCG00000010960;ENSSSCG00000011641;ENSSSCG00000012386;ENSSSCG00000012394;ENSSSCG00000012437;ENSSSCG00000015543;ENSSSCG00000015949;ENSSSCG00000016517;ENSSSCG00000017208;ENSSSCG00000017256;ENSSSCG00000017925;ENSSSCG00000017926;ENSSSCG00000023912;ENSSSCG00000023915;ENSSSCG00000023918;ENSSSCG00000024018;…
GO:0030246	carbohydrate binding	MF	8	185	0.0215891	0.252402	ENSSSCG00000010334;ENSSSCG00000011727;ENSSSCG00000017932;ENSSSCG00000021598;ENSSSCG00000021728;ENSSSCG00000022797;ENSSSCG00000025953;ENSSSCG00000039244
GO:0071300	cellular response to retinoic acid	BP	4	30	0.00217311	0.257038	ENSSSCG00000016533;ENSSSCG00000024674;ENSSSCG00000025578;ENSSSCG00000033190
GO:0016787	hydrolase activity	MF	53	2191	0.0223882	0.257951	ENSSSCG00000000139;ENSSSCG00000000853;ENSSSCG00000000884;ENSSSCG00000002469;ENSSSCG00000002557;ENSSSCG00000002967;ENSSSCG00000004224;ENSSSCG00000004233;ENSSSCG00000004869;ENSSSCG00000005284;ENSSSCG00000005615;ENSSSCG00000005729;ENSSSCG00000006932;ENSSSCG00000007456;ENSSSCG00000007760;ENSSSCG00000009140;ENSSSCG00000009638;ENSSSCG00000010188;ENSSSCG00000010772;ENSSSCG00000011157;ENSSSCG00000011171;…
GO:0008253	5'-nucleotidase activity	MF	2	13	0.0231028	0.262381	ENSSSCG00000000853;ENSSSCG00000028210
GO:0016620	oxidoreductase activity, acting on the aldehyde or oxo group of donors, NAD or NADP as acceptor	MF	3	36	0.0282901	0.271397	ENSSSCG00000014247;ENSSSCG00000025578;ENSSSCG00000028501
GO:0043178	alcohol binding	MF	4	63	0.0288367	0.271397	ENSSSCG00000008118;ENSSSCG00000008745;ENSSSCG00000011230;ENSSSCG00000015462
GO:0008252	nucleotidase activity	MF	2	15	0.0303582	0.271397	ENSSSCG00000000853;ENSSSCG00000028210
GO:0016018	cyclosporin A binding	MF	2	15	0.0303582	0.271397	ENSSSCG00000010330;ENSSSCG00000031128
GO:0022821	potassium ion antiporter activity	MF	2	15	0.0303582	0.271397	ENSSSCG00000002450;ENSSSCG00000023918
GO:0050145	nucleoside monophosphate kinase activity	MF	2	15	0.0303582	0.271397	ENSSSCG00000002504;ENSSSCG00000005627
GO:0046873	metal ion transmembrane transporter activity	MF	13	394	0.0314877	0.271397	ENSSSCG00000000385;ENSSSCG00000002450;ENSSSCG00000010960;ENSSSCG00000012386;ENSSSCG00000012437;ENSSSCG00000015543;ENSSSCG00000023912;ENSSSCG00000023918;ENSSSCG00000024058;ENSSSCG00000029323;ENSSSCG00000031267;ENSSSCG00000033190;ENSSSCG00000042162
GO:0004602	glutathione peroxidase activity	MF	2	16	0.0342798	0.271397	ENSSSCG00000031736;ENSSSCG00000036438
GO:0005355	glucose transmembrane transporter activity	MF	2	16	0.0342798	0.271397	ENSSSCG00000023915;ENSSSCG00000024058
GO:0042813	Wnt-activated receptor activity	MF	2	16	0.0342798	0.271397	ENSSSCG00000012885;ENSSSCG00000029838
GO:0015485	cholesterol binding	MF	3	39	0.034789	0.271397	ENSSSCG00000008118;ENSSSCG00000008745;ENSSSCG00000011230
GO:0001872	(1-&gt;3)-beta-D-glucan binding	MF	1	2	0.0365277	0.271397	ENSSSCG00000011727
GO:0003953	NAD+ nucleosidase activity	MF	1	2	0.0365277	0.271397	ENSSSCG00000028359
GO:0004067	asparaginase activity	MF	1	2	0.0365277	0.271397	ENSSSCG00000013065
GO:0004372	glycine hydroxymethyltransferase activity	MF	1	2	0.0365277	0.271397	ENSSSCG00000036208
GO:0004819	glutamine-tRNA ligase activity	MF	1	2	0.0365277	0.271397	ENSSSCG00000014411
GO:0004823	leucine-tRNA ligase activity	MF	1	2	0.0365277	0.271397	ENSSSCG00000014411
GO:0005171	hepatocyte growth factor receptor binding	MF	1	2	0.0365277	0.271397	ENSSSCG00000016900
GO:0005176	ErbB-2 class receptor binding	MF	1	2	0.0365277	0.271397	ENSSSCG00000011850
GO:0008430	selenium binding	MF	1	2	0.0365277	0.271397	ENSSSCG00000036438
GO:0008768	UDP-sugar diphosphatase activity	MF	1	2	0.0365277	0.271397	ENSSSCG00000002557
GO:0008802	betaine-aldehyde dehydrogenase activity	MF	1	2	0.0365277	0.271397	ENSSSCG00000014247
GO:0015151	alpha-glucoside transmembrane transporter activity	MF	1	2	0.0365277	0.271397	ENSSSCG00000024058
GO:0015275	stretch-activated, cation-selective, calcium channel activity	MF	1	2	0.0365277	0.271397	ENSSSCG00000012386
GO:0016730	oxidoreductase activity, acting on iron-sulfur proteins as donors	MF	1	2	0.0365277	0.271397	ENSSSCG00000005859
GO:0016731	oxidoreductase activity, acting on iron-sulfur proteins as donors, NAD or NADP as acceptor	MF	1	2	0.0365277	0.271397	ENSSSCG00000005859
GO:0031403	lithium ion binding	MF	1	2	0.0365277	0.271397	ENSSSCG00000034758
GO:0031731	CCR6 chemokine receptor binding	MF	1	2	0.0365277	0.271397	ENSSSCG00000029990
GO:0031834	neurokinin receptor binding	MF	1	2	0.0365277	0.271397	ENSSSCG00000038057
GO:0031835	substance P receptor binding	MF	1	2	0.0365277	0.271397	ENSSSCG00000038057
GO:0032542	sulfiredoxin activity	MF	1	2	0.0365277	0.271397	ENSSSCG00000023298
GO:0033842	N-acetyl-beta-glucosaminyl-glycoprotein 4-beta-N-acetylgalactosaminyltransferase activity	MF	1	2	0.0365277	0.271397	ENSSSCG00000033780
GO:0042019	interleukin-23 binding	MF	1	2	0.0365277	0.271397	ENSSSCG00000003801
GO:0042020	interleukin-23 receptor activity	MF	1	2	0.0365277	0.271397	ENSSSCG00000003801
GO:0043682	P-type divalent copper transporter activity	MF	1	2	0.0365277	0.271397	ENSSSCG00000012437
GO:0050135	NAD(P)+ nucleosidase activity	MF	1	2	0.0365277	0.271397	ENSSSCG00000028359
GO:0061809	NAD+ nucleotidase, cyclic ADP-ribose generating	MF	1	2	0.0365277	0.271397	ENSSSCG00000028359
GO:0015149	hexose transmembrane transporter activity	MF	2	17	0.0383862	0.273166	ENSSSCG00000023915;ENSSSCG00000024058
GO:0030506	ankyrin binding	MF	2	17	0.0383862	0.273166	ENSSSCG00000022131;ENSSSCG00000042162
GO:0050661	NADP binding	MF	3	42	0.0419901	0.273166	ENSSSCG00000005859;ENSSSCG00000014080;ENSSSCG00000015268
GO:0008484	sulfuric ester hydrolase activity	MF	2	18	0.0426693	0.273166	ENSSSCG00000007456;ENSSSCG00000038535
GO:0045499	chemorepellent activity	MF	2	19	0.0471211	0.273166	ENSSSCG00000007079;ENSSSCG00000036520
GO:0008028	monocarboxylic acid transmembrane transporter activity	MF	3	44	0.0471731	0.273166	ENSSSCG00000017925;ENSSSCG00000017926;ENSSSCG00000024018
GO:0016758	hexosyltransferase activity	MF	7	180	0.0495301	0.273166	ENSSSCG00000007572;ENSSSCG00000009524;ENSSSCG00000014874;ENSSSCG00000029291;ENSSSCG00000033780;ENSSSCG00000034976;ENSSSCG00000040556
GO:0000030	mannosyltransferase activity	MF	2	20	0.0517342	0.273166	ENSSSCG00000009524;ENSSSCG00000029291
GO:0016903	oxidoreductase activity, acting on the aldehyde or oxo group of donors	MF	3	46	0.0526553	0.273166	ENSSSCG00000014247;ENSSSCG00000025578;ENSSSCG00000028501
GO:0000293	ferric-chelate reductase activity	MF	1	3	0.0542896	0.273166	ENSSSCG00000029304
GO:0001851	complement component C3b binding	MF	1	3	0.0542896	0.273166	ENSSSCG00000035170
GO:0003909	DNA ligase activity	MF	1	3	0.0542896	0.273166	ENSSSCG00000009540
GO:0003910	DNA ligase (ATP) activity	MF	1	3	0.0542896	0.273166	ENSSSCG00000009540
GO:0003958	NADPH-hemoprotein reductase activity	MF	1	3	0.0542896	0.273166	ENSSSCG00000005859
GO:0004421	hydroxymethylglutaryl-CoA synthase activity	MF	1	3	0.0542896	0.273166	ENSSSCG00000036808
GO:0004464	leukotriene-C4 synthase activity	MF	1	3	0.0542896	0.273166	ENSSSCG00000031736
GO:0004704	NF-kappaB-inducing kinase activity	MF	1	3	0.0542896	0.273166	ENSSSCG00000001987
GO:0004784	superoxide dismutase activity	MF	1	3	0.0542896	0.273166	ENSSSCG00000021355
GO:0004802	transketolase activity	MF	1	3	0.0542896	0.273166	ENSSSCG00000026079
GO:0005119	smoothened binding	MF	1	3	0.0542896	0.273166	ENSSSCG00000040416
GO:0005260	intracellularly ATP-gated chloride channel activity	MF	1	3	0.0542896	0.273166	ENSSSCG00000038275
GO:0005350	pyrimidine nucleobase transmembrane transporter activity	MF	1	3	0.0542896	0.273166	ENSSSCG00000010960
GO:0005415	nucleoside:sodium symporter activity	MF	1	3	0.0542896	0.273166	ENSSSCG00000010960
GO:0008107	galactoside 2-alpha-L-fucosyltransferase activity	MF	1	3	0.0542896	0.273166	ENSSSCG00000040556
GO:0008823	cupric reductase activity	MF	1	3	0.0542896	0.273166	ENSSSCG00000029304
GO:0008940	nitrate reductase activity	MF	1	3	0.0542896	0.273166	ENSSSCG00000010826
GO:0015272	ATP-activated inward rectifier potassium channel activity	MF	1	3	0.0542896	0.273166	ENSSSCG00000042162
GO:0015389	pyrimidine- and adenine-specific:sodium symporter activity	MF	1	3	0.0542896	0.273166	ENSSSCG00000010960
GO:0015391	nucleobase:cation symporter activity	MF	1	3	0.0542896	0.273166	ENSSSCG00000010960
GO:0016151	nickel cation binding	MF	1	3	0.0542896	0.273166	ENSSSCG00000006141
GO:0016721	oxidoreductase activity, acting on superoxide radicals as acceptor	MF	1	3	0.0542896	0.273166	ENSSSCG00000021355
GO:0030613	oxidoreductase activity, acting on phosphorus or arsenic in donors	MF	1	3	0.0542896	0.273166	ENSSSCG00000010610
GO:0030614	oxidoreductase activity, acting on phosphorus or arsenic in donors, disulfide as acceptor	MF	1	3	0.0542896	0.273166	ENSSSCG00000010610
GO:0030881	beta-2-microglobulin binding	MF	1	3	0.0542896	0.273166	ENSSSCG00000015540
GO:0031127	alpha-(1,2)-fucosyltransferase activity	MF	1	3	0.0542896	0.273166	ENSSSCG00000040556
GO:0032810	sterol response element binding	MF	1	3	0.0542896	0.273166	ENSSSCG00000013241
GO:0033829	O-fucosylpeptide 3-beta-N-acetylglucosaminyltransferase activity	MF	1	3	0.0542896	0.273166	ENSSSCG00000007572
GO:0035663	Toll-like receptor 2 binding	MF	1	3	0.0542896	0.273166	ENSSSCG00000026592
GO:0042947	glucoside transmembrane transporter activity	MF	1	3	0.0542896	0.273166	ENSSSCG00000024058
GO:0045174	glutathione dehydrogenase (ascorbate) activity	MF	1	3	0.0542896	0.273166	ENSSSCG00000010610
GO:0047044	androstan-3-alpha,17-beta-diol dehydrogenase activity	MF	1	3	0.0542896	0.273166	ENSSSCG00000015930
GO:0050483	IMP 5'-nucleotidase activity	MF	1	3	0.0542896	0.273166	ENSSSCG00000028210
GO:0050610	methylarsonate reductase activity	MF	1	3	0.0542896	0.273166	ENSSSCG00000010610
GO:0052851	ferric-chelate reductase (NADPH) activity	MF	1	3	0.0542896	0.273166	ENSSSCG00000029304
GO:0071633	dihydroceramidase activity	MF	1	3	0.0542896	0.273166	ENSSSCG00000034213
GO:0071936	coreceptor activity involved in Wnt signaling pathway	MF	1	3	0.0542896	0.273166	ENSSSCG00000012885
GO:0099142	intracellularly ATP-gated ion channel activity	MF	1	3	0.0542896	0.273166	ENSSSCG00000038275
GO:0099184	structural constituent of postsynaptic intermediate filament cytoskeleton	MF	1	3	0.0542896	0.273166	ENSSSCG00000009649
GO:0140135	mechanosensitive cation channel activity	MF	1	3	0.0542896	0.273166	ENSSSCG00000012386
GO:0140506	endoplasmic reticulum-autophagosome adaptor activity	MF	1	3	0.0542896	0.273166	ENSSSCG00000016792
GO:1905573	ganglioside GM1 binding	MF	1	3	0.0542896	0.273166	ENSSSCG00000020963
GO:0031418	L-ascorbic acid binding	MF	2	21	0.056501	0.282505	ENSSSCG00000025953;ENSSSCG00000039244
GO:0032934	sterol binding	MF	3	48	0.0584298	0.286304	ENSSSCG00000008118;ENSSSCG00000008745;ENSSSCG00000011230
GO:0015075	ion transmembrane transporter activity	MF	21	790	0.0595581	0.286304	ENSSSCG00000000385;ENSSSCG00000002450;ENSSSCG00000004701;ENSSSCG00000006932;ENSSSCG00000010960;ENSSSCG00000011641;ENSSSCG00000012386;ENSSSCG00000012437;ENSSSCG00000015543;ENSSSCG00000015949;ENSSSCG00000017208;ENSSSCG00000023912;ENSSSCG00000023918;ENSSSCG00000024018;ENSSSCG00000024058;ENSSSCG00000027118;ENSSSCG00000029323;ENSSSCG00000031267;ENSSSCG00000033190;ENSSSCG00000038275;ENSSSCG00000042162
GO:0031406	carboxylic acid binding	MF	5	114	0.0598645	0.286304	ENSSSCG00000005199;ENSSSCG00000020963;ENSSSCG00000025953;ENSSSCG00000036208;ENSSSCG00000039244
GO:0022804	active transmembrane transporter activity	MF	11	351	0.0613509	0.286304	ENSSSCG00000002450;ENSSSCG00000010188;ENSSSCG00000010960;ENSSSCG00000011641;ENSSSCG00000012437;ENSSSCG00000017256;ENSSSCG00000023918;ENSSSCG00000024018;ENSSSCG00000024058;ENSSSCG00000038264;ENSSSCG00000038275
GO:0004550	nucleoside diphosphate kinase activity	MF	2	22	0.0614143	0.286304	ENSSSCG00000002504;ENSSSCG00000005627
GO:0008266	poly(U) RNA binding	MF	2	22	0.0614143	0.286304	ENSSSCG00000007382;ENSSSCG00000029365
GO:0008187	poly-pyrimidine tract binding	MF	2	23	0.0664673	0.286304	ENSSSCG00000007382;ENSSSCG00000029365
GO:0030247	polysaccharide binding	MF	2	23	0.0664673	0.286304	ENSSSCG00000011727;ENSSSCG00000022797
GO:0005200	structural constituent of cytoskeleton	MF	3	51	0.0676236	0.286304	ENSSSCG00000009649;ENSSSCG00000016215;ENSSSCG00000024088
GO:0097602	cullin family protein binding	MF	2	24	0.071653	0.286304	ENSSSCG00000000135;ENSSSCG00000022131
GO:0000026	alpha-1,2-mannosyltransferase activity	MF	1	4	0.0717252	0.286304	ENSSSCG00000029291
GO:0003847	1-alkyl-2-acetylglycerophosphocholine esterase activity	MF	1	4	0.0717252	0.286304	ENSSSCG00000040569
GO:0004127	cytidylate kinase activity	MF	1	4	0.0717252	0.286304	ENSSSCG00000002504
GO:0004301	epoxide hydrolase activity	MF	1	4	0.0717252	0.286304	ENSSSCG00000028144
GO:0004308	exo-alpha-sialidase activity	MF	1	4	0.0717252	0.286304	ENSSSCG00000021638
GO:0004459	L-lactate dehydrogenase activity	MF	1	4	0.0717252	0.286304	ENSSSCG00000032557
GO:0004994	somatostatin receptor activity	MF	1	4	0.0717252	0.286304	ENSSSCG00000001938
GO:0005143	interleukin-12 receptor binding	MF	1	4	0.0717252	0.286304	ENSSSCG00000003801
GO:0005345	purine nucleobase transmembrane transporter activity	MF	1	4	0.0717252	0.286304	ENSSSCG00000010960
GO:0008126	acetylesterase activity	MF	1	4	0.0717252	0.286304	ENSSSCG00000028010
GO:0008449	N-acetylglucosamine-6-sulfatase activity	MF	1	4	0.0717252	0.286304	ENSSSCG00000007456
GO:0008476	protein-tyrosine sulfotransferase activity	MF	1	4	0.0717252	0.286304	ENSSSCG00000009963
GO:0015205	nucleobase transmembrane transporter activity	MF	1	4	0.0717252	0.286304	ENSSSCG00000010960
GO:0015229	L-ascorbic acid transmembrane transporter activity	MF	1	4	0.0717252	0.286304	ENSSSCG00000027118
GO:0015234	thiamine transmembrane transporter activity	MF	1	4	0.0717252	0.286304	ENSSSCG00000017208
GO:0016672	oxidoreductase activity, acting on a sulfur group of donors, quinone or similar compound as acceptor	MF	1	4	0.0717252	0.286304	ENSSSCG00000010610
GO:0016997	alpha-sialidase activity	MF	1	4	0.0717252	0.286304	ENSSSCG00000021638
GO:0019103	pyrimidine nucleotide binding	MF	1	4	0.0717252	0.286304	ENSSSCG00000028210
GO:0030151	molybdenum ion binding	MF	1	4	0.0717252	0.286304	ENSSSCG00000010826
GO:0031544	peptidyl-proline 3-dioxygenase activity	MF	1	4	0.0717252	0.286304	ENSSSCG00000025953
GO:0046790	virion binding	MF	1	4	0.0717252	0.286304	ENSSSCG00000011727
GO:0047023	androsterone dehydrogenase activity	MF	1	4	0.0717252	0.286304	ENSSSCG00000015930
GO:0050833	pyruvate transmembrane transporter activity	MF	1	4	0.0717252	0.286304	ENSSSCG00000024018
GO:0052794	exo-alpha-(2-&gt;3)-sialidase activity	MF	1	4	0.0717252	0.286304	ENSSSCG00000021638
GO:0052795	exo-alpha-(2-&gt;6)-sialidase activity	MF	1	4	0.0717252	0.286304	ENSSSCG00000021638
GO:0052796	exo-alpha-(2-&gt;8)-sialidase activity	MF	1	4	0.0717252	0.286304	ENSSSCG00000021638
GO:0070905	serine binding	MF	1	4	0.0717252	0.286304	ENSSSCG00000036208
GO:0106263	1-acylglycerophosphoserine O-acyltransferase activity	MF	1	4	0.0717252	0.286304	ENSSSCG00000001078
GO:1902387	ceramide 1-phosphate binding	MF	1	4	0.0717252	0.286304	ENSSSCG00000016682
GO:1902388	ceramide 1-phosphate transfer activity	MF	1	4	0.0717252	0.286304	ENSSSCG00000016682
GO:0043177	organic acid binding	MF	4	85	0.0720261	0.286304	ENSSSCG00000005199;ENSSSCG00000025953;ENSSSCG00000036208;ENSSSCG00000039244
GO:0015291	secondary active transmembrane transporter activity	MF	7	198	0.0743937	0.294244	ENSSSCG00000002450;ENSSSCG00000010960;ENSSSCG00000011641;ENSSSCG00000023918;ENSSSCG00000024018;ENSSSCG00000024058;ENSSSCG00000038264
GO:0046466	membrane lipid catabolic process	BP	4	32	0.00276985	0.297693	ENSSSCG00000004233;ENSSSCG00000021638;ENSSSCG00000031736;ENSSSCG00000034213
GO:0046148	pigment biosynthetic process	BP	5	53	0.00294341	0.297693	ENSSSCG00000010188;ENSSSCG00000012409;ENSSSCG00000012437;ENSSSCG00000023162;ENSSSCG00000036208
GO:0009071	serine family amino acid catabolic process	BP	3	16	0.00295673	0.297693	ENSSSCG00000005199;ENSSSCG00000036208;ENSSSCG00000040203
GO:0042438	melanin biosynthetic process	BP	3	16	0.00295673	0.297693	ENSSSCG00000012409;ENSSSCG00000012437;ENSSSCG00000023162
GO:0006790	sulfur compound metabolic process	BP	12	258	0.00326806	0.297693	ENSSSCG00000005859;ENSSSCG00000008002;ENSSSCG00000009963;ENSSSCG00000010610;ENSSSCG00000015462;ENSSSCG00000021355;ENSSSCG00000022153;ENSSSCG00000031269;ENSSSCG00000031736;ENSSSCG00000032003;ENSSSCG00000036808;ENSSSCG00000037559
GO:0034354	'de novo' NAD biosynthetic process from tryptophan	BP	2	5	0.00330333	0.297693	ENSSSCG00000033636;ENSSSCG00000038660
GO:0044359	modulation of molecular function in other organism	BP	2	5	0.00330333	0.297693	ENSSSCG00000010334;ENSSSCG00000011727
GO:0052205	modulation of molecular function in other organism involved in symbiotic interaction	BP	2	5	0.00330333	0.297693	ENSSSCG00000010334;ENSSSCG00000011727
GO:0052422	modulation by host of symbiont catalytic activity	BP	2	5	0.00330333	0.297693	ENSSSCG00000010334;ENSSSCG00000011727
GO:0060545	positive regulation of necroptotic process	BP	2	5	0.00330333	0.297693	ENSSSCG00000001987;ENSSSCG00000009140
GO:0032526	response to retinoic acid	BP	5	55	0.0034626	0.298499	ENSSSCG00000016533;ENSSSCG00000024674;ENSSSCG00000025578;ENSSSCG00000033190;ENSSSCG00000034213
GO:0046189	phenol-containing compound biosynthetic process	BP	4	34	0.00347001	0.298499	ENSSSCG00000012409;ENSSSCG00000012437;ENSSSCG00000022009;ENSSSCG00000023162
GO:0046875	ephrin receptor binding	MF	2	25	0.076965	0.302907	ENSSSCG00000033190;ENSSSCG00000036520
GO:0061134	peptidase regulator activity	MF	7	201	0.079142	0.303125	ENSSSCG00000000884;ENSSSCG00000002479;ENSSSCG00000007384;ENSSSCG00000012960;ENSSSCG00000028871;ENSSSCG00000029879;ENSSSCG00000032423
GO:0004866	endopeptidase inhibitor activity	MF	6	162	0.0796758	0.303125	ENSSSCG00000002479;ENSSSCG00000007384;ENSSSCG00000012960;ENSSSCG00000028871;ENSSSCG00000029879;ENSSSCG00000032423
GO:0070273	phosphatidylinositol-4-phosphate binding	MF	2	26	0.0823968	0.303125	ENSSSCG00000016682;ENSSSCG00000039373
GO:0090482	vitamin transmembrane transporter activity	MF	2	27	0.0879422	0.303125	ENSSSCG00000017208;ENSSSCG00000027118
GO:0052689	carboxylic ester hydrolase activity	MF	5	128	0.0882106	0.303125	ENSSSCG00000005615;ENSSSCG00000014411;ENSSSCG00000028010;ENSSSCG00000037559;ENSSSCG00000040569
GO:0022890	inorganic cation transmembrane transporter activity	MF	15	553	0.0883613	0.303125	ENSSSCG00000000385;ENSSSCG00000002450;ENSSSCG00000004701;ENSSSCG00000010960;ENSSSCG00000012386;ENSSSCG00000012437;ENSSSCG00000015543;ENSSSCG00000023912;ENSSSCG00000023918;ENSSSCG00000024018;ENSSSCG00000024058;ENSSSCG00000029323;ENSSSCG00000031267;ENSSSCG00000033190;ENSSSCG00000042162
GO:0001758	retinal dehydrogenase activity	MF	1	5	0.0888404	0.303125	ENSSSCG00000025578
GO:0004045	aminoacyl-tRNA hydrolase activity	MF	1	5	0.0888404	0.303125	ENSSSCG00000005615
GO:0004457	lactate dehydrogenase activity	MF	1	5	0.0888404	0.303125	ENSSSCG00000032557
GO:0004791	thioredoxin-disulfide reductase activity	MF	1	5	0.0888404	0.303125	ENSSSCG00000023929
GO:0004826	phenylalanine-tRNA ligase activity	MF	1	5	0.0888404	0.303125	ENSSSCG00000032016
GO:0005167	neurotrophin TRK receptor binding	MF	1	5	0.0888404	0.303125	ENSSSCG00000036520
GO:0005375	copper ion transmembrane transporter activity	MF	1	5	0.0888404	0.303125	ENSSSCG00000012437
GO:0008273	calcium, potassium:sodium antiporter activity	MF	1	5	0.0888404	0.303125	ENSSSCG00000002450
GO:0015213	uridine transmembrane transporter activity	MF	1	5	0.0888404	0.303125	ENSSSCG00000010960
GO:0016453	C-acetyltransferase activity	MF	1	5	0.0888404	0.303125	ENSSSCG00000029945
GO:0016723	oxidoreductase activity, acting on metal ions, NAD or NADP as acceptor	MF	1	5	0.0888404	0.303125	ENSSSCG00000029304
GO:0016744	transketolase or transaldolase activity	MF	1	5	0.0888404	0.303125	ENSSSCG00000026079
GO:0016803	ether hydrolase activity	MF	1	5	0.0888404	0.303125	ENSSSCG00000028144
GO:0016886	ligase activity, forming phosphoric ester bonds	MF	1	5	0.0888404	0.303125	ENSSSCG00000009540
GO:0018423	protein C-terminal leucine carboxyl O-methyltransferase activity	MF	1	5	0.0888404	0.303125	ENSSSCG00000039712
GO:0030346	protein phosphatase 2B binding	MF	1	5	0.0888404	0.303125	ENSSSCG00000021355
GO:0031402	sodium ion binding	MF	1	5	0.0888404	0.303125	ENSSSCG00000034758
GO:0034338	short-chain carboxylesterase activity	MF	1	5	0.0888404	0.303125	ENSSSCG00000028010
GO:0036042	long-chain fatty acyl-CoA binding	MF	1	5	0.0888404	0.303125	ENSSSCG00000037559
GO:0042608	T cell receptor binding	MF	1	5	0.0888404	0.303125	ENSSSCG00000015540
GO:0043546	molybdopterin cofactor binding	MF	1	5	0.0888404	0.303125	ENSSSCG00000010826
GO:0047035	testosterone dehydrogenase (NAD+) activity	MF	1	5	0.0888404	0.303125	ENSSSCG00000015930
GO:0098809	nitrite reductase activity	MF	1	5	0.0888404	0.303125	ENSSSCG00000010826
GO:0120016	sphingolipid transfer activity	MF	1	5	0.0888404	0.303125	ENSSSCG00000016682
GO:0120017	ceramide transfer activity	MF	1	5	0.0888404	0.303125	ENSSSCG00000016682
GO:0043168	anion binding	MF	47	2101	0.0912193	0.309237	ENSSSCG00000000139;ENSSSCG00000000884;ENSSSCG00000001987;ENSSSCG00000002504;ENSSSCG00000003913;ENSSSCG00000005199;ENSSSCG00000005627;ENSSSCG00000005729;ENSSSCG00000005859;ENSSSCG00000006733;ENSSSCG00000009540;ENSSSCG00000009638;ENSSSCG00000010188;ENSSSCG00000010826;ENSSSCG00000011246;ENSSSCG00000011363;ENSSSCG00000011827;ENSSSCG00000012336;ENSSSCG00000012392;ENSSSCG00000012437;ENSSSCG00000014080;…
GO:0016667	oxidoreductase activity, acting on a sulfur group of donors	MF	3	58	0.0914097	0.309237	ENSSSCG00000010610;ENSSSCG00000023298;ENSSSCG00000023929
GO:1901617	organic hydroxy compound biosynthetic process	BP	9	165	0.00371524	0.312493	ENSSSCG00000012409;ENSSSCG00000012437;ENSSSCG00000014080;ENSSSCG00000021355;ENSSSCG00000022009;ENSSSCG00000023162;ENSSSCG00000034213;ENSSSCG00000034758;ENSSSCG00000036808
GO:0006767	water-soluble vitamin metabolic process	BP	4	35	0.00386139	0.312959	ENSSSCG00000010610;ENSSSCG00000015462;ENSSSCG00000034758;ENSSSCG00000036208
GO:0006544	glycine metabolic process	BP	3	18	0.0041919	0.312959	ENSSSCG00000005199;ENSSSCG00000036208;ENSSSCG00000040203
GO:0006582	melanin metabolic process	BP	3	18	0.0041919	0.312959	ENSSSCG00000012409;ENSSSCG00000012437;ENSSSCG00000023162
GO:0044550	secondary metabolite biosynthetic process	BP	3	18	0.0041919	0.312959	ENSSSCG00000012409;ENSSSCG00000012437;ENSSSCG00000023162
GO:0051353	positive regulation of oxidoreductase activity	BP	4	36	0.0042816	0.312959	ENSSSCG00000001987;ENSSSCG00000012437;ENSSSCG00000023162;ENSSSCG00000024674
GO:0006575	cellular modified amino acid metabolic process	BP	8	139	0.0044258	0.312959	ENSSSCG00000001078;ENSSSCG00000010610;ENSSSCG00000021355;ENSSSCG00000031736;ENSSSCG00000032003;ENSSSCG00000036208;ENSSSCG00000037637;ENSSSCG00000040569
GO:0043030	regulation of macrophage activation	BP	4	37	0.00473161	0.312959	ENSSSCG00000005203;ENSSSCG00000013241;ENSSSCG00000035170;ENSSSCG00000040569
GO:0015677	copper ion import	BP	2	6	0.0048944	0.312959	ENSSSCG00000012437;ENSSSCG00000029304
GO:0034627	'de novo' NAD biosynthetic process	BP	2	6	0.0048944	0.312959	ENSSSCG00000033636;ENSSSCG00000038660
GO:0045110	intermediate filament bundle assembly	BP	2	6	0.0048944	0.312959	ENSSSCG00000009648;ENSSSCG00000009649
GO:0048023	positive regulation of melanin biosynthetic process	BP	2	6	0.0048944	0.312959	ENSSSCG00000012437;ENSSSCG00000023162
GO:0062100	positive regulation of programmed necrotic cell death	BP	2	6	0.0048944	0.312959	ENSSSCG00000001987;ENSSSCG00000009140
GO:1900378	positive regulation of secondary metabolite biosynthetic process	BP	2	6	0.0048944	0.312959	ENSSSCG00000012437;ENSSSCG00000023162
GO:0098659	inorganic cation import across plasma membrane	BP	6	85	0.00497537	0.312959	ENSSSCG00000000385;ENSSSCG00000002450;ENSSSCG00000012386;ENSSSCG00000015543;ENSSSCG00000023918;ENSSSCG00000024058
GO:0099587	inorganic ion import across plasma membrane	BP	6	85	0.00497537	0.312959	ENSSSCG00000000385;ENSSSCG00000002450;ENSSSCG00000012386;ENSSSCG00000015543;ENSSSCG00000023918;ENSSSCG00000024058
GO:0032272	negative regulation of protein polymerization	BP	5	60	0.00504372	0.312959	ENSSSCG00000002921;ENSSSCG00000005235;ENSSSCG00000011246;ENSSSCG00000012517;ENSSSCG00000028695
GO:0015491	cation:cation antiporter activity	MF	2	28	0.0935954	0.314832	ENSSSCG00000002450;ENSSSCG00000023918
GO:0033218	amide binding	MF	8	251	0.0938555	0.314832	ENSSSCG00000002921;ENSSSCG00000010330;ENSSSCG00000016682;ENSSSCG00000020963;ENSSSCG00000026592;ENSSSCG00000031128;ENSSSCG00000031736;ENSSSCG00000037559
GO:0016765	transferase activity, transferring alkyl or aryl (other than methyl) groups	MF	3	59	0.0950576	0.317524	ENSSSCG00000010610;ENSSSCG00000031736;ENSSSCG00000032003
GO:0001664	G protein-coupled receptor binding	MF	7	211	0.0962119	0.317848	ENSSSCG00000005284;ENSSSCG00000006051;ENSSSCG00000013408;ENSSSCG00000014310;ENSSSCG00000029990;ENSSSCG00000038057;ENSSSCG00000040416
GO:0008324	cation transmembrane transporter activity	MF	16	609	0.0990766	0.317848	ENSSSCG00000000385;ENSSSCG00000002450;ENSSSCG00000004701;ENSSSCG00000010960;ENSSSCG00000012386;ENSSSCG00000012437;ENSSSCG00000015543;ENSSSCG00000017208;ENSSSCG00000023912;ENSSSCG00000023918;ENSSSCG00000024018;ENSSSCG00000024058;ENSSSCG00000029323;ENSSSCG00000031267;ENSSSCG00000033190;ENSSSCG00000042162
GO:0008234	cysteine-type peptidase activity	MF	6	172	0.099094	0.317848	ENSSSCG00000002469;ENSSSCG00000002967;ENSSSCG00000009140;ENSSSCG00000011171;ENSSSCG00000037637;ENSSSCG00000038329
GO:0030414	peptidase inhibitor activity	MF	6	172	0.099094	0.317848	ENSSSCG00000002479;ENSSSCG00000007384;ENSSSCG00000012960;ENSSSCG00000028871;ENSSSCG00000029879;ENSSSCG00000032423
GO:0061135	endopeptidase regulator activity	MF	6	172	0.099094	0.317848	ENSSSCG00000002479;ENSSSCG00000007384;ENSSSCG00000012960;ENSSSCG00000028871;ENSSSCG00000029879;ENSSSCG00000032423
GO:0005132	type I interferon receptor binding	MF	2	29	0.0993503	0.317848	ENSSSCG00000005152;ENSSSCG00000031075
GO:0005217	intracellular ligand-gated ion channel activity	MF	2	29	0.0993503	0.317848	ENSSSCG00000033190;ENSSSCG00000038275
GO:0008198	ferrous iron binding	MF	2	29	0.0993503	0.317848	ENSSSCG00000038660;ENSSSCG00000039244
GO:0016709	oxidoreductase activity, acting on paired donors, with incorporation or reduction of molecular oxygen, NAD(P)H as one donor, and incorporation of one atom of oxygen	MF	2	29	0.0993503	0.317848	ENSSSCG00000000046;ENSSSCG00000015268
GO:0042802	identical protein binding	MF	36	1571	0.101204	0.317848	ENSSSCG00000000135;ENSSSCG00000000884;ENSSSCG00000000978;ENSSSCG00000001987;ENSSSCG00000001989;ENSSSCG00000002144;ENSSSCG00000002557;ENSSSCG00000007079;ENSSSCG00000008640;ENSSSCG00000009140;ENSSSCG00000009649;ENSSSCG00000010188;ENSSSCG00000010334;ENSSSCG00000011727;ENSSSCG00000012394;ENSSSCG00000012409;ENSSSCG00000013248;ENSSSCG00000014247;ENSSSCG00000015136;ENSSSCG00000015462;ENSSSCG00000015949;…
GO:0005509	calcium ion binding	MF	16	613	0.103325	0.317848	ENSSSCG00000000207;ENSSSCG00000002967;ENSSSCG00000003663;ENSSSCG00000007456;ENSSSCG00000008072;ENSSSCG00000010772;ENSSSCG00000012121;ENSSSCG00000013248;ENSSSCG00000015543;ENSSSCG00000015949;ENSSSCG00000020963;ENSSSCG00000023162;ENSSSCG00000026360;ENSSSCG00000032423;ENSSSCG00000040569;ENSSSCG00000044449
GO:0004623	phospholipase A2 activity	MF	2	30	0.105201	0.317848	ENSSSCG00000028010;ENSSSCG00000040569
GO:0016229	steroid dehydrogenase activity	MF	2	30	0.105201	0.317848	ENSSSCG00000009225;ENSSSCG00000015930
GO:0001849	complement component C1q complex binding	MF	1	6	0.105641	0.317848	ENSSSCG00000011727
GO:0003880	protein C-terminal carboxyl O-methyltransferase activity	MF	1	6	0.105641	0.317848	ENSSSCG00000039712
GO:0005412	glucose:sodium symporter activity	MF	1	6	0.105641	0.317848	ENSSSCG00000024058
GO:0016778	diphosphotransferase activity	MF	1	6	0.105641	0.317848	ENSSSCG00000015462
GO:0017040	N-acylsphingosine amidohydrolase activity	MF	1	6	0.105641	0.317848	ENSSSCG00000034213
GO:0030020	extracellular matrix structural constituent conferring tensile strength	MF	1	6	0.105641	0.317848	ENSSSCG00000005380
GO:0035374	chondroitin sulfate binding	MF	1	6	0.105641	0.317848	ENSSSCG00000016522
GO:0043295	glutathione binding	MF	1	6	0.105641	0.317848	ENSSSCG00000031736
GO:0046912	acyltransferase, acyl groups converted into alkyl on transfer	MF	1	6	0.105641	0.317848	ENSSSCG00000036808
GO:0050693	LBD domain binding	MF	1	6	0.105641	0.317848	ENSSSCG00000012409
GO:0102121	ceramidase activity	MF	1	6	0.105641	0.317848	ENSSSCG00000034213
GO:1903136	cuprous ion binding	MF	1	6	0.105641	0.317848	ENSSSCG00000012437
GO:0004175	endopeptidase activity	MF	12	433	0.105734	0.317848	ENSSSCG00000002967;ENSSSCG00000007760;ENSSSCG00000009140;ENSSSCG00000010772;ENSSSCG00000011157;ENSSSCG00000012074;ENSSSCG00000024914;ENSSSCG00000029879;ENSSSCG00000033116;ENSSSCG00000034792;ENSSSCG00000035337;ENSSSCG00000038329
GO:0030276	clathrin binding	MF	3	62	0.106349	0.317848	ENSSSCG00000006762;ENSSSCG00000024088;ENSSSCG00000027226
GO:0140359	ABC-type transporter activity	MF	3	62	0.106349	0.317848	ENSSSCG00000010188;ENSSSCG00000017256;ENSSSCG00000038275
GO:0005102	signaling receptor binding	MF	27	1140	0.108043	0.3217	ENSSSCG00000001917;ENSSSCG00000003146;ENSSSCG00000003801;ENSSSCG00000005152;ENSSSCG00000005203;ENSSSCG00000005216;ENSSSCG00000005284;ENSSSCG00000006051;ENSSSCG00000006738;ENSSSCG00000007079;ENSSSCG00000011850;ENSSSCG00000012121;ENSSSCG00000013248;ENSSSCG00000013408;ENSSSCG00000014310;ENSSSCG00000015540;ENSSSCG00000016522;ENSSSCG00000016900;ENSSSCG00000026592;ENSSSCG00000029990;ENSSSCG00000031075;…
GO:0015298	solute:cation antiporter activity	MF	2	31	0.111143	0.327513	ENSSSCG00000002450;ENSSSCG00000023918
GO:0016597	amino acid binding	MF	2	31	0.111143	0.327513	ENSSSCG00000005199;ENSSSCG00000036208
GO:0036094	small molecule binding	MF	48	2186	0.111231	0.327513	ENSSSCG00000000139;ENSSSCG00000000884;ENSSSCG00000001987;ENSSSCG00000002504;ENSSSCG00000003913;ENSSSCG00000005199;ENSSSCG00000005284;ENSSSCG00000005627;ENSSSCG00000005729;ENSSSCG00000005859;ENSSSCG00000006733;ENSSSCG00000008118;ENSSSCG00000008745;ENSSSCG00000009540;ENSSSCG00000009638;ENSSSCG00000010188;ENSSSCG00000010826;ENSSSCG00000011230;ENSSSCG00000011363;ENSSSCG00000011827;ENSSSCG00000012336;…
GO:0016776	phosphotransferase activity, phosphate group as acceptor	MF	2	32	0.117171	0.332519	ENSSSCG00000002504;ENSSSCG00000005627
GO:0005515	protein binding	MF	148	7448	0.118864	0.332519	ENSSSCG00000000135;ENSSSCG00000000884;ENSSSCG00000000920;ENSSSCG00000000978;ENSSSCG00000000985;ENSSSCG00000001917;ENSSSCG00000001987;ENSSSCG00000001989;ENSSSCG00000002144;ENSSSCG00000002450;ENSSSCG00000002469;ENSSSCG00000002557;ENSSSCG00000002714;ENSSSCG00000002921;ENSSSCG00000002997;ENSSSCG00000003146;ENSSSCG00000003801;ENSSSCG00000003913;ENSSSCG00000004065;ENSSSCG00000004364;ENSSSCG00000004873;…
GO:0005262	calcium channel activity	MF	4	102	0.119568	0.332519	ENSSSCG00000002450;ENSSSCG00000012386;ENSSSCG00000015543;ENSSSCG00000023912
GO:0022853	active ion transmembrane transporter activity	MF	7	224	0.121199	0.332519	ENSSSCG00000002450;ENSSSCG00000010960;ENSSSCG00000011641;ENSSSCG00000012437;ENSSSCG00000023918;ENSSSCG00000024018;ENSSSCG00000024058
GO:0004022	alcohol dehydrogenase (NAD+) activity	MF	1	7	0.122133	0.332519	ENSSSCG00000015930
GO:0004062	aryl sulfotransferase activity	MF	1	7	0.122133	0.332519	ENSSSCG00000022153
GO:0004169	dolichyl-phosphate-mannose-protein mannosyltransferase activity	MF	1	7	0.122133	0.332519	ENSSSCG00000009524
GO:0004415	hyalurononglucosaminidase activity	MF	1	7	0.122133	0.332519	ENSSSCG00000016601
GO:0004499	N,N-dimethylaniline monooxygenase activity	MF	1	7	0.122133	0.332519	ENSSSCG00000015268
GO:0005113	patched binding	MF	1	7	0.122133	0.332519	ENSSSCG00000040416
GO:0005223	intracellular cGMP-activated cation channel activity	MF	1	7	0.122133	0.332519	ENSSSCG00000033190
GO:0008656	cysteine-type endopeptidase activator activity involved in apoptotic process	MF	1	7	0.122133	0.332519	ENSSSCG00000000884
GO:0015129	lactate transmembrane transporter activity	MF	1	7	0.122133	0.332519	ENSSSCG00000024018
GO:0015168	glycerol transmembrane transporter activity	MF	1	7	0.122133	0.332519	ENSSSCG00000033190
GO:0015214	pyrimidine nucleoside transmembrane transporter activity	MF	1	7	0.122133	0.332519	ENSSSCG00000010960
GO:0016801	hydrolase activity, acting on ether bonds	MF	1	7	0.122133	0.332519	ENSSSCG00000028144
GO:0018455	alcohol dehydrogenase [NAD(P)+] activity	MF	1	7	0.122133	0.332519	ENSSSCG00000015930
GO:0030283	testosterone dehydrogenase [NAD(P)] activity	MF	1	7	0.122133	0.332519	ENSSSCG00000015930
GO:0032051	clathrin light chain binding	MF	1	7	0.122133	0.332519	ENSSSCG00000024088
GO:0047631	ADP-ribose diphosphatase activity	MF	1	7	0.122133	0.332519	ENSSSCG00000002557
GO:0055056	D-glucose transmembrane transporter activity	MF	1	7	0.122133	0.332519	ENSSSCG00000024058
GO:1900750	oligopeptide binding	MF	1	7	0.122133	0.332519	ENSSSCG00000031736
GO:0046915	transition metal ion transmembrane transporter activity	MF	2	33	0.123278	0.334492	ENSSSCG00000000385;ENSSSCG00000012437
GO:0097186	amelogenesis	BP	3	20	0.0056983	0.337001	ENSSSCG00000002450;ENSSSCG00000009220;ENSSSCG00000034792
GO:0098703	calcium ion import across plasma membrane	BP	3	20	0.0056983	0.337001	ENSSSCG00000002450;ENSSSCG00000012386;ENSSSCG00000015543
GO:1902656	calcium ion import into cytosol	BP	3	20	0.0056983	0.337001	ENSSSCG00000002450;ENSSSCG00000012386;ENSSSCG00000015543
GO:0042440	pigment metabolic process	BP	5	62	0.00579984	0.337729	ENSSSCG00000010188;ENSSSCG00000012409;ENSSSCG00000012437;ENSSSCG00000023162;ENSSSCG00000036208
GO:0043436	oxoacid metabolic process	BP	24	741	0.005899	0.338299	ENSSSCG00000000046;ENSSSCG00000005199;ENSSSCG00000010610;ENSSSCG00000010826;ENSSSCG00000011169;ENSSSCG00000013065;ENSSSCG00000013241;ENSSSCG00000014411;ENSSSCG00000015268;ENSSSCG00000015930;ENSSSCG00000022009;ENSSSCG00000025578;ENSSSCG00000028010;ENSSSCG00000029945;ENSSSCG00000031736;ENSSSCG00000032016;ENSSSCG00000032557;ENSSSCG00000033636;ENSSSCG00000034213;ENSSSCG00000036208;ENSSSCG00000037559;…
GO:0005496	steroid binding	MF	3	67	0.126252	0.341395	ENSSSCG00000008118;ENSSSCG00000008745;ENSSSCG00000011230
GO:0046914	transition metal ion binding	MF	23	969	0.128454	0.34405	ENSSSCG00000000046;ENSSSCG00000004233;ENSSSCG00000006141;ENSSSCG00000006733;ENSSSCG00000008816;ENSSSCG00000010772;ENSSSCG00000010826;ENSSSCG00000011157;ENSSSCG00000012437;ENSSSCG00000012589;ENSSSCG00000013241;ENSSSCG00000014214;ENSSSCG00000016793;ENSSSCG00000021355;ENSSSCG00000022953;ENSSSCG00000024674;ENSSSCG00000025953;ENSSSCG00000029879;ENSSSCG00000034066;ENSSSCG00000034758;ENSSSCG00000036208;…
GO:0015318	inorganic molecular entity transmembrane transporter activity	MF	17	685	0.132132	0.34405	ENSSSCG00000000385;ENSSSCG00000002450;ENSSSCG00000004701;ENSSSCG00000006932;ENSSSCG00000010960;ENSSSCG00000012386;ENSSSCG00000012437;ENSSSCG00000015543;ENSSSCG00000023912;ENSSSCG00000023918;ENSSSCG00000024018;ENSSSCG00000024058;ENSSSCG00000029323;ENSSSCG00000031267;ENSSSCG00000033190;ENSSSCG00000038275;ENSSSCG00000042162
GO:0015267	channel activity	MF	12	452	0.132344	0.34405	ENSSSCG00000002450;ENSSSCG00000004701;ENSSSCG00000006932;ENSSSCG00000012386;ENSSSCG00000012394;ENSSSCG00000015543;ENSSSCG00000023912;ENSSSCG00000023918;ENSSSCG00000029323;ENSSSCG00000033190;ENSSSCG00000038275;ENSSSCG00000042162
GO:0022803	passive transmembrane transporter activity	MF	12	452	0.132344	0.34405	ENSSSCG00000002450;ENSSSCG00000004701;ENSSSCG00000006932;ENSSSCG00000012386;ENSSSCG00000012394;ENSSSCG00000015543;ENSSSCG00000023912;ENSSSCG00000023918;ENSSSCG00000029323;ENSSSCG00000033190;ENSSSCG00000038275;ENSSSCG00000042162
GO:0016811	hydrolase activity, acting on carbon-nitrogen (but not peptide) bonds, in linear amides	MF	3	69	0.134561	0.34405	ENSSSCG00000013065;ENSSSCG00000033636;ENSSSCG00000034213
GO:0004439	phosphatidylinositol-4,5-bisphosphate 5-phosphatase activity	MF	1	8	0.138321	0.34405	ENSSSCG00000012315
GO:0004767	sphingomyelin phosphodiesterase activity	MF	1	8	0.138321	0.34405	ENSSSCG00000004233
GO:0004862	cAMP-dependent protein kinase inhibitor activity	MF	1	8	0.138321	0.34405	ENSSSCG00000011363
GO:0005165	neurotrophin receptor binding	MF	1	8	0.138321	0.34405	ENSSSCG00000036520
GO:0008519	ammonium transmembrane transporter activity	MF	1	8	0.138321	0.34405	ENSSSCG00000033190
GO:0008603	cAMP-dependent protein kinase regulator activity	MF	1	8	0.138321	0.34405	ENSSSCG00000011363
GO:0015038	glutathione disulfide oxidoreductase activity	MF	1	8	0.138321	0.34405	ENSSSCG00000010610
GO:0015166	polyol transmembrane transporter activity	MF	1	8	0.138321	0.34405	ENSSSCG00000033190
GO:0015183	L-aspartate transmembrane transporter activity	MF	1	8	0.138321	0.34405	ENSSSCG00000015949
GO:0016505	peptidase activator activity involved in apoptotic process	MF	1	8	0.138321	0.34405	ENSSSCG00000000884
GO:0016742	hydroxymethyl-, formyl- and related transferase activity	MF	1	8	0.138321	0.34405	ENSSSCG00000036208
GO:0019911	structural constituent of myelin sheath	MF	1	8	0.138321	0.34405	ENSSSCG00000006003
GO:0030976	thiamine pyrophosphate binding	MF	1	8	0.138321	0.34405	ENSSSCG00000026079
GO:0047134	protein-disulfide reductase (NAD(P)) activity	MF	1	8	0.138321	0.34405	ENSSSCG00000023929
GO:0050700	CARD domain binding	MF	1	8	0.138321	0.34405	ENSSSCG00000025260
GO:0070573	metallodipeptidase activity	MF	1	8	0.138321	0.34405	ENSSSCG00000004869
GO:0071723	lipopeptide binding	MF	1	8	0.138321	0.34405	ENSSSCG00000026592
GO:0099186	structural constituent of postsynapse	MF	1	8	0.138321	0.34405	ENSSSCG00000009649
GO:1990275	preribosome binding	MF	1	8	0.138321	0.34405	ENSSSCG00000016793
GO:0015079	potassium ion transmembrane transporter activity	MF	5	148	0.138641	0.34405	ENSSSCG00000002450;ENSSSCG00000023918;ENSSSCG00000029323;ENSSSCG00000033190;ENSSSCG00000042162
GO:0046943	carboxylic acid transmembrane transporter activity	MF	5	148	0.138641	0.34405	ENSSSCG00000015949;ENSSSCG00000017925;ENSSSCG00000017926;ENSSSCG00000024018;ENSSSCG00000027118
GO:0015293	symporter activity	MF	4	108	0.138918	0.34405	ENSSSCG00000010960;ENSSSCG00000024018;ENSSSCG00000024058;ENSSSCG00000038264
GO:0005216	ion channel activity	MF	11	411	0.139696	0.344902	ENSSSCG00000002450;ENSSSCG00000004701;ENSSSCG00000006932;ENSSSCG00000012386;ENSSSCG00000015543;ENSSSCG00000023912;ENSSSCG00000023918;ENSSSCG00000029323;ENSSSCG00000033190;ENSSSCG00000038275;ENSSSCG00000042162
GO:0005342	organic acid transmembrane transporter activity	MF	5	149	0.141442	0.348132	ENSSSCG00000015949;ENSSSCG00000017925;ENSSSCG00000017926;ENSSSCG00000024018;ENSSSCG00000027118
GO:0016741	transferase activity, transferring one-carbon groups	MF	7	234	0.142475	0.34959	ENSSSCG00000001073;ENSSSCG00000007717;ENSSSCG00000026812;ENSSSCG00000033766;ENSSSCG00000036208;ENSSSCG00000036387;ENSSSCG00000039712
GO:0005883	neurofilament	CC	2	7	0.00662275	0.353155	ENSSSCG00000009648;ENSSSCG00000009649
GO:0005960	glycine cleavage complex	CC	2	7	0.00662275	0.353155	ENSSSCG00000005199;ENSSSCG00000040203
GO:0009897	external side of plasma membrane	CC	12	308	0.0117302	0.353155	ENSSSCG00000001396;ENSSSCG00000001917;ENSSSCG00000015540;ENSSSCG00000017932;ENSSSCG00000021638;ENSSSCG00000023584;ENSSSCG00000023915;ENSSSCG00000030088;ENSSSCG00000032135;ENSSSCG00000032525;ENSSSCG00000035574;ENSSSCG00000036520
GO:0005737	cytoplasm	CC	187	9069	0.0122463	0.353155	ENSSSCG00000000046;ENSSSCG00000000135;ENSSSCG00000000139;ENSSSCG00000000207;ENSSSCG00000000884;ENSSSCG00000000978;ENSSSCG00000000985;ENSSSCG00000001073;ENSSSCG00000001396;ENSSSCG00000001987;ENSSSCG00000001989;ENSSSCG00000002450;ENSSSCG00000002504;ENSSSCG00000002701;ENSSSCG00000002714;ENSSSCG00000002921;ENSSSCG00000002967;ENSSSCG00000004065;ENSSSCG00000004364;ENSSSCG00000004869;ENSSSCG00000005199;…
GO:0031984	organelle subcompartment	CC	26	885	0.0123896	0.353155	ENSSSCG00000000046;ENSSSCG00000001396;ENSSSCG00000002921;ENSSSCG00000006762;ENSSSCG00000007456;ENSSSCG00000012074;ENSSSCG00000012437;ENSSSCG00000012490;ENSSSCG00000014080;ENSSSCG00000015268;ENSSSCG00000015540;ENSSSCG00000015930;ENSSSCG00000016682;ENSSSCG00000016792;ENSSSCG00000023915;ENSSSCG00000026360;ENSSSCG00000028464;ENSSSCG00000028755;ENSSSCG00000029291;ENSSSCG00000031692;ENSSSCG00000031736;…
GO:0043230	extracellular organelle	CC	5	78	0.0142742	0.353155	ENSSSCG00000008118;ENSSSCG00000008745;ENSSSCG00000023915;ENSSSCG00000029990;ENSSSCG00000033190
GO:0065010	extracellular membrane-bounded organelle	CC	5	78	0.0142742	0.353155	ENSSSCG00000008118;ENSSSCG00000008745;ENSSSCG00000023915;ENSSSCG00000029990;ENSSSCG00000033190
GO:1903561	extracellular vesicle	CC	5	78	0.0142742	0.353155	ENSSSCG00000008118;ENSSSCG00000008745;ENSSSCG00000023915;ENSSSCG00000029990;ENSSSCG00000033190
GO:0009986	cell surface	CC	20	642	0.0151703	0.353155	ENSSSCG00000001396;ENSSSCG00000001917;ENSSSCG00000006738;ENSSSCG00000007456;ENSSSCG00000008118;ENSSSCG00000008745;ENSSSCG00000010772;ENSSSCG00000013248;ENSSSCG00000015540;ENSSSCG00000016570;ENSSSCG00000017932;ENSSSCG00000021638;ENSSSCG00000023584;ENSSSCG00000023915;ENSSSCG00000029879;ENSSSCG00000030088;ENSSSCG00000032135;ENSSSCG00000032525;ENSSSCG00000035574;ENSSSCG00000036520
GO:0098791	Golgi apparatus subcompartment	CC	10	246	0.0156887	0.353155	ENSSSCG00000002921;ENSSSCG00000006762;ENSSSCG00000007456;ENSSSCG00000012074;ENSSSCG00000012437;ENSSSCG00000016682;ENSSSCG00000023915;ENSSSCG00000028755;ENSSSCG00000033780;ENSSSCG00000040556
GO:0042581	specific granule	CC	2	11	0.0165255	0.353155	ENSSSCG00000010772;ENSSSCG00000029879
GO:0044295	axonal growth cone	CC	2	11	0.0165255	0.353155	ENSSSCG00000007079;ENSSSCG00000015632
GO:0031526	brush border membrane	CC	3	30	0.0171989	0.353155	ENSSSCG00000010960;ENSSSCG00000033190;ENSSSCG00000035893
GO:0032807	DNA ligase IV complex	CC	1	1	0.0183354	0.353155	ENSSSCG00000009540
GO:0033291	eukaryotic 80S initiation complex	CC	1	1	0.0183354	0.353155	ENSSSCG00000017239
GO:0070992	translation initiation complex	CC	1	1	0.0183354	0.353155	ENSSSCG00000017239
GO:0098635	protein complex involved in cell-cell adhesion	CC	1	1	0.0183354	0.353155	ENSSSCG00000021728
GO:0099182	presynaptic intermediate filament cytoskeleton	CC	1	1	0.0183354	0.353155	ENSSSCG00000009649
GO:1990724	galectin complex	CC	1	1	0.0183354	0.353155	ENSSSCG00000021728
GO:1990742	microvesicle	CC	1	1	0.0183354	0.353155	ENSSSCG00000029990
GO:0072525	pyridine-containing compound biosynthetic process	BP	3	21	0.00655783	0.355053	ENSSSCG00000033636;ENSSSCG00000034758;ENSSSCG00000038660
GO:0002138	retinoic acid biosynthetic process	BP	2	7	0.00676849	0.355053	ENSSSCG00000015930;ENSSSCG00000025578
GO:0016102	diterpenoid biosynthetic process	BP	2	7	0.00676849	0.355053	ENSSSCG00000015930;ENSSSCG00000025578
GO:0042989	sequestering of actin monomers	BP	2	7	0.00676849	0.355053	ENSSSCG00000012517;ENSSSCG00000028695
GO:0051340	regulation of ligase activity	BP	2	7	0.00676849	0.355053	ENSSSCG00000001987;ENSSSCG00000036387
GO:0051351	positive regulation of ligase activity	BP	2	7	0.00676849	0.355053	ENSSSCG00000001987;ENSSSCG00000036387
GO:0006749	glutathione metabolic process	BP	4	41	0.00684779	0.355053	ENSSSCG00000010610;ENSSSCG00000021355;ENSSSCG00000031736;ENSSSCG00000032003
GO:0019205	nucleobase-containing compound kinase activity	MF	2	37	0.148414	0.361649	ENSSSCG00000002504;ENSSSCG00000005627
GO:1901618	organic hydroxy compound transmembrane transporter activity	MF	2	37	0.148414	0.361649	ENSSSCG00000024018;ENSSSCG00000033190
GO:0016788	hydrolase activity, acting on ester bonds	MF	17	702	0.153493	0.361649	ENSSSCG00000000853;ENSSSCG00000004224;ENSSSCG00000004233;ENSSSCG00000005615;ENSSSCG00000007456;ENSSSCG00000012315;ENSSSCG00000012367;ENSSSCG00000014411;ENSSSCG00000015136;ENSSSCG00000022953;ENSSSCG00000028010;ENSSSCG00000028210;ENSSSCG00000033116;ENSSSCG00000033993;ENSSSCG00000037559;ENSSSCG00000038535;ENSSSCG00000040569
GO:0000900	translation repressor activity, mRNA regulatory element binding	MF	1	9	0.154213	0.361649	ENSSSCG00000036208
GO:0005337	nucleoside transmembrane transporter activity	MF	1	9	0.154213	0.361649	ENSSSCG00000010960
GO:0008172	S-methyltransferase activity	MF	1	9	0.154213	0.361649	ENSSSCG00000001073
GO:0008970	phospholipase A1 activity	MF	1	9	0.154213	0.361649	ENSSSCG00000028010
GO:0015132	prostaglandin transmembrane transporter activity	MF	1	9	0.154213	0.361649	ENSSSCG00000011641
GO:0015347	sodium-independent organic anion transmembrane transporter activity	MF	1	9	0.154213	0.361649	ENSSSCG00000011641
GO:0016653	oxidoreductase activity, acting on NAD(P)H, heme protein as acceptor	MF	1	9	0.154213	0.361649	ENSSSCG00000005859
GO:0016661	oxidoreductase activity, acting on other nitrogenous compounds as donors	MF	1	9	0.154213	0.361649	ENSSSCG00000010826
GO:0016668	oxidoreductase activity, acting on a sulfur group of donors, NAD(P) as acceptor	MF	1	9	0.154213	0.361649	ENSSSCG00000023929
GO:0030955	potassium ion binding	MF	1	9	0.154213	0.361649	ENSSSCG00000034758
GO:0046965	retinoid X receptor binding	MF	1	9	0.154213	0.361649	ENSSSCG00000013241
GO:2001069	glycogen binding	MF	1	9	0.154213	0.361649	ENSSSCG00000022797
GO:0004715	non-membrane spanning protein tyrosine kinase activity	MF	2	38	0.154851	0.362078	ENSSSCG00000016489;ENSSSCG00000024674
GO:0060295	regulation of cilium movement involved in cell motility	BP	3	22	0.00749037	0.363661	ENSSSCG00000029990;ENSSSCG00000038057;ENSSSCG00000040416
GO:1902019	regulation of cilium-dependent cell motility	BP	3	22	0.00749037	0.363661	ENSSSCG00000029990;ENSSSCG00000038057;ENSSSCG00000040416
GO:0006082	organic acid metabolic process	BP	24	759	0.00784065	0.363661	ENSSSCG00000000046;ENSSSCG00000005199;ENSSSCG00000010610;ENSSSCG00000010826;ENSSSCG00000011169;ENSSSCG00000013065;ENSSSCG00000013241;ENSSSCG00000014411;ENSSSCG00000015268;ENSSSCG00000015930;ENSSSCG00000022009;ENSSSCG00000025578;ENSSSCG00000028010;ENSSSCG00000029945;ENSSSCG00000031736;ENSSSCG00000032016;ENSSSCG00000032557;ENSSSCG00000033636;ENSSSCG00000034213;ENSSSCG00000036208;ENSSSCG00000037559;…
GO:0006546	glycine catabolic process	BP	2	8	0.00891461	0.363661	ENSSSCG00000005199;ENSSSCG00000040203
GO:0008090	retrograde axonal transport	BP	2	8	0.00891461	0.363661	ENSSSCG00000009649;ENSSSCG00000021355
GO:0019464	glycine decarboxylation via glycine cleavage system	BP	2	8	0.00891461	0.363661	ENSSSCG00000005199;ENSSSCG00000040203
GO:0070170	regulation of tooth mineralization	BP	2	8	0.00891461	0.363661	ENSSSCG00000008072;ENSSSCG00000009220
GO:0019752	carboxylic acid metabolic process	BP	23	726	0.00896025	0.363661	ENSSSCG00000000046;ENSSSCG00000005199;ENSSSCG00000010610;ENSSSCG00000011169;ENSSSCG00000013065;ENSSSCG00000013241;ENSSSCG00000014411;ENSSSCG00000015268;ENSSSCG00000015930;ENSSSCG00000022009;ENSSSCG00000025578;ENSSSCG00000028010;ENSSSCG00000029945;ENSSSCG00000031736;ENSSSCG00000032016;ENSSSCG00000032557;ENSSSCG00000033636;ENSSSCG00000034213;ENSSSCG00000036208;ENSSSCG00000037559;ENSSSCG00000038660;…
GO:0010812	negative regulation of cell-substrate adhesion	BP	4	45	0.00951062	0.363661	ENSSSCG00000005235;ENSSSCG00000032423;ENSSSCG00000034213;ENSSSCG00000036520
GO:0070887	cellular response to chemical stimulus	BP	57	2264	0.00952197	0.363661	ENSSSCG00000000046;ENSSSCG00000000385;ENSSSCG00000000978;ENSSSCG00000001073;ENSSSCG00000001938;ENSSSCG00000001987;ENSSSCG00000002906;ENSSSCG00000003801;ENSSSCG00000004928;ENSSSCG00000005152;ENSSSCG00000005235;ENSSSCG00000005284;ENSSSCG00000005859;ENSSSCG00000007079;ENSSSCG00000007456;ENSSSCG00000007492;ENSSSCG00000008072;ENSSSCG00000009140;ENSSSCG00000009524;ENSSSCG00000010188;ENSSSCG00000010330;…
GO:0046849	bone remodeling	BP	5	70	0.00962705	0.363661	ENSSSCG00000006051;ENSSSCG00000010772;ENSSSCG00000012885;ENSSSCG00000015136;ENSSSCG00000016522
GO:0035773	insulin secretion involved in cellular response to glucose stimulus	BP	4	46	0.0102676	0.363661	ENSSSCG00000012885;ENSSSCG00000034114;ENSSSCG00000035893;ENSSSCG00000036520
GO:0060119	inner ear receptor cell development	BP	4	46	0.0102676	0.363661	ENSSSCG00000000139;ENSSSCG00000006051;ENSSSCG00000021355;ENSSSCG00000029838
GO:0001894	tissue homeostasis	BP	9	194	0.0104009	0.363661	ENSSSCG00000000920;ENSSSCG00000008745;ENSSSCG00000010334;ENSSSCG00000010772;ENSSSCG00000015136;ENSSSCG00000021355;ENSSSCG00000023162;ENSSSCG00000029843;ENSSSCG00000040416
GO:0016226	iron-sulfur cluster assembly	BP	3	25	0.0107391	0.363661	ENSSSCG00000005859;ENSSSCG00000008002;ENSSSCG00000031269
GO:0031163	metallo-sulfur cluster assembly	BP	3	25	0.0107391	0.363661	ENSSSCG00000005859;ENSSSCG00000008002;ENSSSCG00000031269
GO:0042476	odontogenesis	BP	6	100	0.0107839	0.363661	ENSSSCG00000002450;ENSSSCG00000008072;ENSSSCG00000009220;ENSSSCG00000013248;ENSSSCG00000033190;ENSSSCG00000034792
GO:0006569	tryptophan catabolic process	BP	2	9	0.0113221	0.363661	ENSSSCG00000033636;ENSSSCG00000038660
GO:0010940	positive regulation of necrotic cell death	BP	2	9	0.0113221	0.363661	ENSSSCG00000001987;ENSSSCG00000009140
GO:0030157	pancreatic juice secretion	BP	2	9	0.0113221	0.363661	ENSSSCG00000013241;ENSSSCG00000033190
GO:0032780	negative regulation of ATPase activity	BP	2	9	0.0113221	0.363661	ENSSSCG00000010330;ENSSSCG00000029879
GO:0042436	indole-containing compound catabolic process	BP	2	9	0.0113221	0.363661	ENSSSCG00000033636;ENSSSCG00000038660
GO:0046218	indolalkylamine catabolic process	BP	2	9	0.0113221	0.363661	ENSSSCG00000033636;ENSSSCG00000038660
GO:0051639	actin filament network formation	BP	2	9	0.0113221	0.363661	ENSSSCG00000015632;ENSSSCG00000039769
GO:0060052	neurofilament cytoskeleton organization	BP	2	9	0.0113221	0.363661	ENSSSCG00000009649;ENSSSCG00000021355
GO:0072584	caveolin-mediated endocytosis	BP	2	9	0.0113221	0.363661	ENSSSCG00000000978;ENSSSCG00000008118
GO:1902093	positive regulation of flagellated sperm motility	BP	2	9	0.0113221	0.363661	ENSSSCG00000029990;ENSSSCG00000038057
GO:2000155	positive regulation of cilium-dependent cell motility	BP	2	9	0.0113221	0.363661	ENSSSCG00000029990;ENSSSCG00000038057
GO:2000345	regulation of hepatocyte proliferation	BP	2	9	0.0113221	0.363661	ENSSSCG00000007456;ENSSSCG00000016522
GO:0033688	regulation of osteoblast proliferation	BP	3	26	0.0119759	0.363661	ENSSSCG00000006051;ENSSSCG00000012885;ENSSSCG00000029879
GO:0019725	cellular homeostasis	BP	21	662	0.0120699	0.363661	ENSSSCG00000000135;ENSSSCG00000000385;ENSSSCG00000002450;ENSSSCG00000009524;ENSSSCG00000012386;ENSSSCG00000012437;ENSSSCG00000012885;ENSSSCG00000015136;ENSSSCG00000015543;ENSSSCG00000021355;ENSSSCG00000023918;ENSSSCG00000023929;ENSSSCG00000024674;ENSSSCG00000027928;ENSSSCG00000029323;ENSSSCG00000033190;ENSSSCG00000034114;ENSSSCG00000035893;ENSSSCG00000036520;ENSSSCG00000038057;ENSSSCG00000038660
GO:0046395	carboxylic acid catabolic process	BP	9	199	0.0121394	0.363661	ENSSSCG00000005199;ENSSSCG00000013065;ENSSSCG00000028010;ENSSSCG00000029945;ENSSSCG00000033636;ENSSSCG00000036208;ENSSSCG00000038660;ENSSSCG00000039244;ENSSSCG00000040203
GO:0016054	organic acid catabolic process	BP	9	200	0.0125117	0.363661	ENSSSCG00000005199;ENSSSCG00000013065;ENSSSCG00000028010;ENSSSCG00000029945;ENSSSCG00000033636;ENSSSCG00000036208;ENSSSCG00000038660;ENSSSCG00000039244;ENSSSCG00000040203
GO:0060249	anatomical structure homeostasis	BP	10	236	0.0129114	0.363661	ENSSSCG00000000920;ENSSSCG00000008745;ENSSSCG00000010334;ENSSSCG00000010772;ENSSSCG00000015136;ENSSSCG00000021355;ENSSSCG00000023162;ENSSSCG00000029843;ENSSSCG00000038660;ENSSSCG00000040416
GO:0042430	indole-containing compound metabolic process	BP	3	27	0.0132912	0.363661	ENSSSCG00000022009;ENSSSCG00000033636;ENSSSCG00000038660
GO:0019637	organophosphate metabolic process	BP	24	796	0.013488	0.363661	ENSSSCG00000001078;ENSSSCG00000002504;ENSSSCG00000002557;ENSSSCG00000004233;ENSSSCG00000005627;ENSSSCG00000008233;ENSSSCG00000011169;ENSSSCG00000012315;ENSSSCG00000013241;ENSSSCG00000014080;ENSSSCG00000015462;ENSSSCG00000028010;ENSSSCG00000028210;ENSSSCG00000029291;ENSSSCG00000032481;ENSSSCG00000033636;ENSSSCG00000034213;ENSSSCG00000034758;ENSSSCG00000036387;ENSSSCG00000036808;ENSSSCG00000037559;…
GO:0055082	cellular chemical homeostasis	BP	19	588	0.0138612	0.363661	ENSSSCG00000000135;ENSSSCG00000000385;ENSSSCG00000002450;ENSSSCG00000009524;ENSSSCG00000012386;ENSSSCG00000012437;ENSSSCG00000012885;ENSSSCG00000015136;ENSSSCG00000015543;ENSSSCG00000021355;ENSSSCG00000023918;ENSSSCG00000024674;ENSSSCG00000027928;ENSSSCG00000029323;ENSSSCG00000033190;ENSSSCG00000034114;ENSSSCG00000035893;ENSSSCG00000036520;ENSSSCG00000038057
GO:0002227	innate immune response in mucosa	BP	2	10	0.0139806	0.363661	ENSSSCG00000029879;ENSSSCG00000029990
GO:0003353	positive regulation of cilium movement	BP	2	10	0.0139806	0.363661	ENSSSCG00000029990;ENSSSCG00000038057
GO:0034145	positive regulation of toll-like receptor 4 signaling pathway	BP	2	10	0.0139806	0.363661	ENSSSCG00000013241;ENSSSCG00000029879
GO:0048548	regulation of pinocytosis	BP	2	10	0.0139806	0.363661	ENSSSCG00000008118;ENSSSCG00000013241
GO:0018958	phenol-containing compound metabolic process	BP	5	77	0.0141628	0.363661	ENSSSCG00000012409;ENSSSCG00000012437;ENSSSCG00000012589;ENSSSCG00000022009;ENSSSCG00000023162
GO:1901700	response to oxygen-containing compound	BP	28	974	0.0143649	0.363661	ENSSSCG00000000978;ENSSSCG00000001987;ENSSSCG00000002450;ENSSSCG00000003801;ENSSSCG00000005235;ENSSSCG00000005284;ENSSSCG00000005859;ENSSSCG00000007492;ENSSSCG00000010330;ENSSSCG00000012409;ENSSSCG00000012885;ENSSSCG00000013241;ENSSSCG00000014411;ENSSSCG00000015828;ENSSSCG00000016533;ENSSSCG00000021355;ENSSSCG00000023915;ENSSSCG00000024674;ENSSSCG00000025578;ENSSSCG00000029879;ENSSSCG00000033190;…
GO:0030837	negative regulation of actin filament polymerization	BP	4	51	0.0146347	0.363661	ENSSSCG00000005235;ENSSSCG00000011246;ENSSSCG00000012517;ENSSSCG00000028695
GO:0050829	defense response to Gram-negative bacterium	BP	4	51	0.0146347	0.363661	ENSSSCG00000015540;ENSSSCG00000029879;ENSSSCG00000029990;ENSSSCG00000033190
GO:0051336	regulation of hydrolase activity	BP	24	802	0.0146536	0.363661	ENSSSCG00000000884;ENSSSCG00000001987;ENSSSCG00000001989;ENSSSCG00000002479;ENSSSCG00000004065;ENSSSCG00000007384;ENSSSCG00000008118;ENSSSCG00000010330;ENSSSCG00000010840;ENSSSCG00000011727;ENSSSCG00000012960;ENSSSCG00000013241;ENSSSCG00000014411;ENSSSCG00000017328;ENSSSCG00000021355;ENSSSCG00000023788;ENSSSCG00000024674;ENSSSCG00000028871;ENSSSCG00000029879;ENSSSCG00000032423;ENSSSCG00000033190;…
GO:0010939	regulation of necrotic cell death	BP	3	28	0.0146855	0.363661	ENSSSCG00000001987;ENSSSCG00000009140;ENSSSCG00000010330
GO:0030149	sphingolipid catabolic process	BP	3	28	0.0146855	0.363661	ENSSSCG00000004233;ENSSSCG00000021638;ENSSSCG00000034213
GO:0072524	pyridine-containing compound metabolic process	BP	3	28	0.0146855	0.363661	ENSSSCG00000033636;ENSSSCG00000034758;ENSSSCG00000038660
GO:0048477	oogenesis	BP	5	78	0.01491	0.363661	ENSSSCG00000007382;ENSSSCG00000011727;ENSSSCG00000016489;ENSSSCG00000016522;ENSSSCG00000016533
GO:0051402	neuron apoptotic process	BP	8	173	0.0155558	0.363661	ENSSSCG00000000884;ENSSSCG00000009524;ENSSSCG00000009540;ENSSSCG00000009649;ENSSSCG00000010772;ENSSSCG00000012409;ENSSSCG00000016792;ENSSSCG00000021355
GO:0048878	chemical homeostasis	BP	26	897	0.0163859	0.363661	ENSSSCG00000000135;ENSSSCG00000000385;ENSSSCG00000002450;ENSSSCG00000008002;ENSSSCG00000009524;ENSSSCG00000010334;ENSSSCG00000012386;ENSSSCG00000012437;ENSSSCG00000012885;ENSSSCG00000013241;ENSSSCG00000015136;ENSSSCG00000015543;ENSSSCG00000017932;ENSSSCG00000021355;ENSSSCG00000023915;ENSSSCG00000023918;ENSSSCG00000024674;ENSSSCG00000027928;ENSSSCG00000029304;ENSSSCG00000029323;ENSSSCG00000031423;…
GO:0042364	water-soluble vitamin biosynthetic process	BP	2	11	0.0168801	0.363661	ENSSSCG00000015462;ENSSSCG00000034758
GO:0043031	negative regulation of macrophage activation	BP	2	11	0.0168801	0.363661	ENSSSCG00000013241;ENSSSCG00000035170
GO:0043455	regulation of secondary metabolic process	BP	2	11	0.0168801	0.363661	ENSSSCG00000012437;ENSSSCG00000023162
GO:0044406	adhesion of symbiont to host	BP	2	11	0.0168801	0.363661	ENSSSCG00000010334;ENSSSCG00000029879
GO:0048012	hepatocyte growth factor receptor signaling pathway	BP	2	11	0.0168801	0.363661	ENSSSCG00000011851;ENSSSCG00000016900
GO:0048021	regulation of melanin biosynthetic process	BP	2	11	0.0168801	0.363661	ENSSSCG00000012437;ENSSSCG00000023162
GO:0090177	establishment of planar polarity involved in neural tube closure	BP	2	11	0.0168801	0.363661	ENSSSCG00000006051;ENSSSCG00000029838
GO:1900376	regulation of secondary metabolite biosynthetic process	BP	2	11	0.0168801	0.363661	ENSSSCG00000012437;ENSSSCG00000023162
GO:1901701	cellular response to oxygen-containing compound	BP	23	770	0.0170107	0.363661	ENSSSCG00000000978;ENSSSCG00000001987;ENSSSCG00000005235;ENSSSCG00000005284;ENSSSCG00000005859;ENSSSCG00000007492;ENSSSCG00000010330;ENSSSCG00000012885;ENSSSCG00000013241;ENSSSCG00000014411;ENSSSCG00000015828;ENSSSCG00000016533;ENSSSCG00000021355;ENSSSCG00000023915;ENSSSCG00000024674;ENSSSCG00000025578;ENSSSCG00000029879;ENSSSCG00000033190;ENSSSCG00000034114;ENSSSCG00000035893;ENSSSCG00000036208;…
GO:0006956	complement activation	BP	4	54	0.0177418	0.363661	ENSSSCG00000024791;ENSSSCG00000024914;ENSSSCG00000035170;ENSSSCG00000036007
GO:0007292	female gamete generation	BP	6	112	0.0180359	0.363661	ENSSSCG00000007382;ENSSSCG00000011727;ENSSSCG00000016489;ENSSSCG00000016522;ENSSSCG00000016533;ENSSSCG00000039769
GO:0001971	negative regulation of activation of membrane attack complex	BP	1	1	0.0185434	0.363661	ENSSSCG00000024791
GO:0003345	proepicardium cell migration involved in pericardium morphogenesis	BP	1	1	0.0185434	0.363661	ENSSSCG00000007079
GO:0006530	asparagine catabolic process	BP	1	1	0.0185434	0.363661	ENSSSCG00000013065
GO:0009443	pyridoxal 5'-phosphate salvage	BP	1	1	0.0185434	0.363661	ENSSSCG00000034758
GO:0009822	alkaloid catabolic process	BP	1	1	0.0185434	0.363661	ENSSSCG00000000046
GO:0010021	amylopectin biosynthetic process	BP	1	1	0.0185434	0.363661	ENSSSCG00000023915
GO:0010849	regulation of proton-transporting ATPase activity, rotational mechanism	BP	1	1	0.0185434	0.363661	ENSSSCG00000010330
GO:0021605	cranial nerve maturation	BP	1	1	0.0185434	0.363661	ENSSSCG00000002450
GO:0021630	olfactory nerve maturation	BP	1	1	0.0185434	0.363661	ENSSSCG00000002450
GO:0033076	isoquinoline alkaloid metabolic process	BP	1	1	0.0185434	0.363661	ENSSSCG00000000046
GO:0033345	asparagine catabolic process via L-aspartate	BP	1	1	0.0185434	0.363661	ENSSSCG00000013065
GO:0034150	toll-like receptor 6 signaling pathway	BP	1	1	0.0185434	0.363661	ENSSSCG00000026592
GO:0034463	90S preribosome assembly	BP	1	1	0.0185434	0.363661	ENSSSCG00000017239
GO:0034514	mitochondrial unfolded protein response	BP	1	1	0.0185434	0.363661	ENSSSCG00000010188
GO:0035378	carbon dioxide transmembrane transport	BP	1	1	0.0185434	0.363661	ENSSSCG00000033190
GO:0036368	cone photoresponse recovery	BP	1	1	0.0185434	0.363661	ENSSSCG00000002450
GO:0044651	adhesion of symbiont to host epithelial cell	BP	1	1	0.0185434	0.363661	ENSSSCG00000010334
GO:0046074	dTMP catabolic process	BP	1	1	0.0185434	0.363661	ENSSSCG00000028210
GO:0051102	DNA ligation involved in DNA recombination	BP	1	1	0.0185434	0.363661	ENSSSCG00000009540
GO:0051796	negative regulation of timing of catagen	BP	1	1	0.0185434	0.363661	ENSSSCG00000023162
GO:0060377	negative regulation of mast cell differentiation	BP	1	1	0.0185434	0.363661	ENSSSCG00000040875
GO:0060803	BMP signaling pathway involved in mesodermal cell fate specification	BP	1	1	0.0185434	0.363661	ENSSSCG00000002906
GO:0060901	regulation of hair cycle by canonical Wnt signaling pathway	BP	1	1	0.0185434	0.363661	ENSSSCG00000023162
GO:0061580	colon epithelial cell migration	BP	1	1	0.0185434	0.363661	ENSSSCG00000038535
GO:0061938	protein localization to somatodendritic compartment	BP	1	1	0.0185434	0.363661	ENSSSCG00000006762
GO:0072019	proximal convoluted tubule development	BP	1	1	0.0185434	0.363661	ENSSSCG00000033190
GO:0072020	proximal straight tubule development	BP	1	1	0.0185434	0.363661	ENSSSCG00000033190
GO:0072022	descending thin limb development	BP	1	1	0.0185434	0.363661	ENSSSCG00000033190
GO:0072032	proximal convoluted tubule segment 2 development	BP	1	1	0.0185434	0.363661	ENSSSCG00000033190
GO:0072220	metanephric descending thin limb development	BP	1	1	0.0185434	0.363661	ENSSSCG00000033190
GO:0072229	metanephric proximal convoluted tubule development	BP	1	1	0.0185434	0.363661	ENSSSCG00000033190
GO:0072230	metanephric proximal straight tubule development	BP	1	1	0.0185434	0.363661	ENSSSCG00000033190
GO:0072232	metanephric proximal convoluted tubule segment 2 development	BP	1	1	0.0185434	0.363661	ENSSSCG00000033190
GO:0072680	extracellular matrix-dependent thymocyte migration	BP	1	1	0.0185434	0.363661	ENSSSCG00000010772
GO:0072681	fibronectin-dependent thymocyte migration	BP	1	1	0.0185434	0.363661	ENSSSCG00000010772
GO:0090242	retinoic acid receptor signaling pathway involved in somitogenesis	BP	1	1	0.0185434	0.363661	ENSSSCG00000025578
GO:0090341	negative regulation of secretion of lysosomal enzymes	BP	1	1	0.0185434	0.363661	ENSSSCG00000013241
GO:0090347	regulation of cellular organohalogen metabolic process	BP	1	1	0.0185434	0.363661	ENSSSCG00000000046
GO:0090348	regulation of cellular organofluorine metabolic process	BP	1	1	0.0185434	0.363661	ENSSSCG00000000046
GO:0090349	negative regulation of cellular organohalogen metabolic process	BP	1	1	0.0185434	0.363661	ENSSSCG00000000046
GO:0090350	negative regulation of cellular organofluorine metabolic process	BP	1	1	0.0185434	0.363661	ENSSSCG00000000046
GO:1901629	regulation of presynaptic membrane organization	BP	1	1	0.0185434	0.363661	ENSSSCG00000013248
GO:1901631	positive regulation of presynaptic membrane organization	BP	1	1	0.0185434	0.363661	ENSSSCG00000013248
GO:1902204	positive regulation of hepatocyte growth factor receptor signaling pathway	BP	1	1	0.0185434	0.363661	ENSSSCG00000016900
GO:1902908	regulation of melanosome transport	BP	1	1	0.0185434	0.363661	ENSSSCG00000023162
GO:1902910	positive regulation of melanosome transport	BP	1	1	0.0185434	0.363661	ENSSSCG00000023162
GO:1904058	positive regulation of sensory perception of pain	BP	1	1	0.0185434	0.363661	ENSSSCG00000036387
GO:1904481	response to tetrahydrofolate	BP	1	1	0.0185434	0.363661	ENSSSCG00000036208
GO:1904482	cellular response to tetrahydrofolate	BP	1	1	0.0185434	0.363661	ENSSSCG00000036208
GO:1905025	negative regulation of membrane repolarization during ventricular cardiac muscle cell action potential	BP	1	1	0.0185434	0.363661	ENSSSCG00000029323
GO:1905032	negative regulation of membrane repolarization during cardiac muscle cell action potential	BP	1	1	0.0185434	0.363661	ENSSSCG00000029323
GO:1905226	regulation of adhesion of symbiont to host epithelial cell	BP	1	1	0.0185434	0.363661	ENSSSCG00000010334
GO:1905281	positive regulation of retrograde transport, endosome to Golgi	BP	1	1	0.0185434	0.363661	ENSSSCG00000028755
GO:1990680	response to melanocyte-stimulating hormone	BP	1	1	0.0185434	0.363661	ENSSSCG00000002450
GO:2000413	regulation of fibronectin-dependent thymocyte migration	BP	1	1	0.0185434	0.363661	ENSSSCG00000010772
GO:2000415	positive regulation of fibronectin-dependent thymocyte migration	BP	1	1	0.0185434	0.363661	ENSSSCG00000010772
GO:2000896	amylopectin metabolic process	BP	1	1	0.0185434	0.363661	ENSSSCG00000023915
GO:0043903	regulation of biological process involved in symbiotic interaction	BP	4	55	0.0188617	0.366161	ENSSSCG00000000985;ENSSSCG00000010334;ENSSSCG00000011727;ENSSSCG00000029879
GO:0001503	ossification	BP	11	288	0.0189765	0.366161	ENSSSCG00000006051;ENSSSCG00000008072;ENSSSCG00000009220;ENSSSCG00000012409;ENSSSCG00000012885;ENSSSCG00000013248;ENSSSCG00000016522;ENSSSCG00000017239;ENSSSCG00000017254;ENSSSCG00000029879;ENSSSCG00000036893
GO:0003352	regulation of cilium movement	BP	3	31	0.019348	0.366161	ENSSSCG00000029990;ENSSSCG00000038057;ENSSSCG00000040416
GO:0006695	cholesterol biosynthetic process	BP	3	31	0.019348	0.366161	ENSSSCG00000014080;ENSSSCG00000021355;ENSSSCG00000036808
GO:0033687	osteoblast proliferation	BP	3	31	0.019348	0.366161	ENSSSCG00000006051;ENSSSCG00000012885;ENSSSCG00000029879
GO:0045494	photoreceptor cell maintenance	BP	3	31	0.019348	0.366161	ENSSSCG00000008745;ENSSSCG00000029843;ENSSSCG00000040416
GO:1902653	secondary alcohol biosynthetic process	BP	3	31	0.019348	0.366161	ENSSSCG00000014080;ENSSSCG00000021355;ENSSSCG00000036808
GO:0015718	monocarboxylic acid transport	BP	5	84	0.0199503	0.368901	ENSSSCG00000011641;ENSSSCG00000017925;ENSSSCG00000017926;ENSSSCG00000024018;ENSSSCG00000040569
GO:0006957	complement activation, alternative pathway	BP	2	12	0.0200106	0.368901	ENSSSCG00000024914;ENSSSCG00000035170
GO:0009068	aspartate family amino acid catabolic process	BP	2	12	0.0200106	0.368901	ENSSSCG00000013065;ENSSSCG00000029945
GO:0015732	prostaglandin transport	BP	2	12	0.0200106	0.368901	ENSSSCG00000011641;ENSSSCG00000040569
GO:0043524	negative regulation of neuron apoptotic process	BP	6	115	0.0202699	0.368901	ENSSSCG00000009540;ENSSSCG00000009649;ENSSSCG00000010772;ENSSSCG00000012409;ENSSSCG00000016792;ENSSSCG00000021355
GO:0098739	import across plasma membrane	BP	7	148	0.0205501	0.368901	ENSSSCG00000000385;ENSSSCG00000002450;ENSSSCG00000012386;ENSSSCG00000015543;ENSSSCG00000023918;ENSSSCG00000024058;ENSSSCG00000035893
GO:0006506	GPI anchor biosynthetic process	BP	3	32	0.021063	0.368901	ENSSSCG00000029291;ENSSSCG00000032481;ENSSSCG00000038329
GO:0009566	fertilization	BP	7	149	0.0212337	0.368901	ENSSSCG00000004701;ENSSSCG00000014214;ENSSSCG00000016489;ENSSSCG00000016579;ENSSSCG00000016601;ENSSSCG00000026360;ENSSSCG00000040416
GO:0006066	alcohol metabolic process	BP	10	256	0.0215032	0.368901	ENSSSCG00000000046;ENSSSCG00000012315;ENSSSCG00000012885;ENSSSCG00000014080;ENSSSCG00000015462;ENSSSCG00000015930;ENSSSCG00000021355;ENSSSCG00000032481;ENSSSCG00000034213;ENSSSCG00000036808
GO:0044282	small molecule catabolic process	BP	11	296	0.0226861	0.368901	ENSSSCG00000005199;ENSSSCG00000012315;ENSSSCG00000012885;ENSSSCG00000013065;ENSSSCG00000028010;ENSSSCG00000029945;ENSSSCG00000033636;ENSSSCG00000036208;ENSSSCG00000038660;ENSSSCG00000039244;ENSSSCG00000040203
GO:0009954	proximal/distal pattern formation	BP	3	33	0.0228586	0.368901	ENSSSCG00000013248;ENSSSCG00000025578;ENSSSCG00000034474
GO:0016126	sterol biosynthetic process	BP	3	33	0.0228586	0.368901	ENSSSCG00000014080;ENSSSCG00000021355;ENSSSCG00000036808
GO:0090102	cochlea development	BP	3	33	0.0228586	0.368901	ENSSSCG00000000139;ENSSSCG00000006051;ENSSSCG00000029838
GO:0002523	leukocyte migration involved in inflammatory response	BP	2	13	0.0233628	0.368901	ENSSSCG00000010772;ENSSSCG00000016522
GO:0010771	negative regulation of cell morphogenesis involved in differentiation	BP	2	13	0.0233628	0.368901	ENSSSCG00000005235;ENSSSCG00000036520
GO:0042249	establishment of planar polarity of embryonic epithelium	BP	2	13	0.0233628	0.368901	ENSSSCG00000006051;ENSSSCG00000029838
GO:0046940	nucleoside monophosphate phosphorylation	BP	2	13	0.0233628	0.368901	ENSSSCG00000002504;ENSSSCG00000005627
GO:0072531	pyrimidine-containing compound transmembrane transport	BP	2	13	0.0233628	0.368901	ENSSSCG00000010960;ENSSSCG00000017208
GO:1900025	negative regulation of substrate adhesion-dependent cell spreading	BP	2	13	0.0233628	0.368901	ENSSSCG00000005235;ENSSSCG00000036520
GO:0060294	cilium movement involved in cell motility	BP	6	119	0.0235312	0.368901	ENSSSCG00000004701;ENSSSCG00000023918;ENSSSCG00000029843;ENSSSCG00000029990;ENSSSCG00000038057;ENSSSCG00000040416
GO:0060070	canonical Wnt signaling pathway	BP	10	260	0.0236285	0.368901	ENSSSCG00000005235;ENSSSCG00000006051;ENSSSCG00000007456;ENSSSCG00000012885;ENSSSCG00000013248;ENSSSCG00000023162;ENSSSCG00000027928;ENSSSCG00000028995;ENSSSCG00000029838;ENSSSCG00000029843
GO:0060113	inner ear receptor cell differentiation	BP	4	59	0.0237738	0.368901	ENSSSCG00000000139;ENSSSCG00000006051;ENSSSCG00000021355;ENSSSCG00000029838
GO:0010721	negative regulation of cell development	BP	6	120	0.0243983	0.368901	ENSSSCG00000005235;ENSSSCG00000013248;ENSSSCG00000016489;ENSSSCG00000016522;ENSSSCG00000036520;ENSSSCG00000036893
GO:0006505	GPI anchor metabolic process	BP	3	34	0.0247349	0.368901	ENSSSCG00000029291;ENSSSCG00000032481;ENSSSCG00000038329
GO:0060122	inner ear receptor cell stereocilium organization	BP	3	34	0.0247349	0.368901	ENSSSCG00000000139;ENSSSCG00000006051;ENSSSCG00000021355
GO:0009306	protein secretion	BP	9	225	0.0248415	0.368901	ENSSSCG00000012885;ENSSSCG00000013241;ENSSSCG00000014080;ENSSSCG00000029304;ENSSSCG00000034114;ENSSSCG00000035893;ENSSSCG00000036520;ENSSSCG00000042162;ENSSSCG00000051585
GO:0048871	multicellular organismal homeostasis	BP	13	379	0.0250688	0.368901	ENSSSCG00000000920;ENSSSCG00000008745;ENSSSCG00000010334;ENSSSCG00000010772;ENSSSCG00000013241;ENSSSCG00000015136;ENSSSCG00000015268;ENSSSCG00000017254;ENSSSCG00000021355;ENSSSCG00000023162;ENSSSCG00000029843;ENSSSCG00000033190;ENSSSCG00000040416
GO:0006766	vitamin metabolic process	BP	4	60	0.0251116	0.368901	ENSSSCG00000010610;ENSSSCG00000015462;ENSSSCG00000034758;ENSSSCG00000036208
GO:0097194	execution phase of apoptosis	BP	4	60	0.0251116	0.368901	ENSSSCG00000000884;ENSSSCG00000001989;ENSSSCG00000009140;ENSSSCG00000011557
GO:0035592	establishment of protein localization to extracellular region	BP	9	226	0.0254679	0.368901	ENSSSCG00000012885;ENSSSCG00000013241;ENSSSCG00000014080;ENSSSCG00000029304;ENSSSCG00000034114;ENSSSCG00000035893;ENSSSCG00000036520;ENSSSCG00000042162;ENSSSCG00000051585
GO:0016055	Wnt signaling pathway	BP	12	341	0.0258309	0.368901	ENSSSCG00000002906;ENSSSCG00000005235;ENSSSCG00000006051;ENSSSCG00000007456;ENSSSCG00000008081;ENSSSCG00000012885;ENSSSCG00000013248;ENSSSCG00000023162;ENSSSCG00000027928;ENSSSCG00000028995;ENSSSCG00000029838;ENSSSCG00000029843
GO:0009069	serine family amino acid metabolic process	BP	3	35	0.0266918	0.368901	ENSSSCG00000005199;ENSSSCG00000036208;ENSSSCG00000040203
GO:0045806	negative regulation of endocytosis	BP	3	35	0.0266918	0.368901	ENSSSCG00000008118;ENSSSCG00000013241;ENSSSCG00000021638
GO:0070266	necroptotic process	BP	3	35	0.0266918	0.368901	ENSSSCG00000001987;ENSSSCG00000009140;ENSSSCG00000010330
GO:0098542	defense response to other organism	BP	21	718	0.0269208	0.368901	ENSSSCG00000001987;ENSSSCG00000003801;ENSSSCG00000005152;ENSSSCG00000007384;ENSSSCG00000009140;ENSSSCG00000010334;ENSSSCG00000010772;ENSSSCG00000011727;ENSSSCG00000012409;ENSSSCG00000015540;ENSSSCG00000024914;ENSSSCG00000026592;ENSSSCG00000029879;ENSSSCG00000029990;ENSSSCG00000031075;ENSSSCG00000033190;ENSSSCG00000034792;ENSSSCG00000035170;ENSSSCG00000036007;ENSSSCG00000040569;ENSSSCG00000040998
GO:0006825	copper ion transport	BP	2	14	0.0269274	0.368901	ENSSSCG00000012437;ENSSSCG00000029304
GO:0009074	aromatic amino acid family catabolic process	BP	2	14	0.0269274	0.368901	ENSSSCG00000033636;ENSSSCG00000038660
GO:0019755	one-carbon compound transport	BP	2	14	0.0269274	0.368901	ENSSSCG00000031423;ENSSSCG00000033190
GO:0045916	negative regulation of complement activation	BP	2	14	0.0269274	0.368901	ENSSSCG00000024791;ENSSSCG00000035170
GO:0072574	hepatocyte proliferation	BP	2	14	0.0269274	0.368901	ENSSSCG00000007456;ENSSSCG00000016522
GO:0072575	epithelial cell proliferation involved in liver morphogenesis	BP	2	14	0.0269274	0.368901	ENSSSCG00000007456;ENSSSCG00000016522
GO:0097202	activation of cysteine-type endopeptidase activity	BP	2	14	0.0269274	0.368901	ENSSSCG00000000884;ENSSSCG00000001989
GO:1901317	regulation of flagellated sperm motility	BP	2	14	0.0269274	0.368901	ENSSSCG00000029990;ENSSSCG00000038057
GO:0198738	cell-cell signaling by wnt	BP	12	344	0.02739	0.368901	ENSSSCG00000002906;ENSSSCG00000005235;ENSSSCG00000006051;ENSSSCG00000007456;ENSSSCG00000008081;ENSSSCG00000012885;ENSSSCG00000013248;ENSSSCG00000023162;ENSSSCG00000027928;ENSSSCG00000028995;ENSSSCG00000029838;ENSSSCG00000029843
GO:0006520	cellular amino acid metabolic process	BP	10	267	0.0277065	0.368901	ENSSSCG00000005199;ENSSSCG00000013065;ENSSSCG00000014411;ENSSSCG00000022009;ENSSSCG00000029945;ENSSSCG00000032016;ENSSSCG00000033636;ENSSSCG00000036208;ENSSSCG00000038660;ENSSSCG00000040203
GO:2000243	positive regulation of reproductive process	BP	4	62	0.0279212	0.368901	ENSSSCG00000007572;ENSSSCG00000016533;ENSSSCG00000029990;ENSSSCG00000038057
GO:0003341	cilium movement	BP	7	158	0.0281088	0.368901	ENSSSCG00000004701;ENSSSCG00000007814;ENSSSCG00000023918;ENSSSCG00000029843;ENSSSCG00000029990;ENSSSCG00000038057;ENSSSCG00000040416
GO:0010810	regulation of cell-substrate adhesion	BP	7	158	0.0281088	0.368901	ENSSSCG00000005235;ENSSSCG00000009220;ENSSSCG00000012121;ENSSSCG00000028359;ENSSSCG00000032423;ENSSSCG00000034213;ENSSSCG00000036520
GO:0002762	negative regulation of myeloid leukocyte differentiation	BP	3	36	0.0287291	0.368901	ENSSSCG00000015136;ENSSSCG00000034114;ENSSSCG00000040875
GO:0070839	metal ion export	BP	3	36	0.0287291	0.368901	ENSSSCG00000002450;ENSSSCG00000012437;ENSSSCG00000029323
GO:1902622	regulation of neutrophil migration	BP	3	36	0.0287291	0.368901	ENSSSCG00000010772;ENSSSCG00000012392;ENSSSCG00000028359
GO:0006721	terpenoid metabolic process	BP	4	63	0.0293934	0.368901	ENSSSCG00000000046;ENSSSCG00000015930;ENSSSCG00000025578;ENSSSCG00000036808
GO:0042490	mechanoreceptor differentiation	BP	4	63	0.0293934	0.368901	ENSSSCG00000000139;ENSSSCG00000006051;ENSSSCG00000021355;ENSSSCG00000029838
GO:0071692	protein localization to extracellular region	BP	9	232	0.0294626	0.368901	ENSSSCG00000012885;ENSSSCG00000013241;ENSSSCG00000014080;ENSSSCG00000029304;ENSSSCG00000034114;ENSSSCG00000035893;ENSSSCG00000036520;ENSSSCG00000042162;ENSSSCG00000051585
GO:0002076	osteoblast development	BP	2	15	0.0306954	0.368901	ENSSSCG00000012885;ENSSSCG00000036893
GO:0002385	mucosal immune response	BP	2	15	0.0306954	0.368901	ENSSSCG00000029879;ENSSSCG00000029990
GO:0042537	benzene-containing compound metabolic process	BP	2	15	0.0306954	0.368901	ENSSSCG00000033636;ENSSSCG00000038660
GO:0072576	liver morphogenesis	BP	2	15	0.0306954	0.368901	ENSSSCG00000007456;ENSSSCG00000016522
GO:0002920	regulation of humoral immune response	BP	3	37	0.0308466	0.368901	ENSSSCG00000024791;ENSSSCG00000034792;ENSSSCG00000035170
GO:0055086	nucleobase-containing small molecule metabolic process	BP	15	473	0.0311316	0.368901	ENSSSCG00000002504;ENSSSCG00000002557;ENSSSCG00000004233;ENSSSCG00000005627;ENSSSCG00000011169;ENSSSCG00000014080;ENSSSCG00000028210;ENSSSCG00000029761;ENSSSCG00000033636;ENSSSCG00000034213;ENSSSCG00000036208;ENSSSCG00000036387;ENSSSCG00000036808;ENSSSCG00000037559;ENSSSCG00000038660
GO:0001539	cilium or flagellum-dependent cell motility	BP	6	128	0.0321109	0.368901	ENSSSCG00000004701;ENSSSCG00000023918;ENSSSCG00000029843;ENSSSCG00000029990;ENSSSCG00000038057;ENSSSCG00000040416
GO:0060285	cilium-dependent cell motility	BP	6	128	0.0321109	0.368901	ENSSSCG00000004701;ENSSSCG00000023918;ENSSSCG00000029843;ENSSSCG00000029990;ENSSSCG00000038057;ENSSSCG00000040416
GO:1901264	carbohydrate derivative transport	BP	4	65	0.0324736	0.368901	ENSSSCG00000010960;ENSSSCG00000016682;ENSSSCG00000024058;ENSSSCG00000040569
GO:0060632	regulation of microtubule-based movement	BP	3	38	0.0330438	0.368901	ENSSSCG00000029990;ENSSSCG00000038057;ENSSSCG00000040416
GO:0061178	regulation of insulin secretion involved in cellular response to glucose stimulus	BP	3	38	0.0330438	0.368901	ENSSSCG00000012885;ENSSSCG00000034114;ENSSSCG00000036520
GO:0051494	negative regulation of cytoskeleton organization	BP	6	129	0.0331744	0.368901	ENSSSCG00000002921;ENSSSCG00000005235;ENSSSCG00000006957;ENSSSCG00000011246;ENSSSCG00000012517;ENSSSCG00000028695
GO:0030041	actin filament polymerization	BP	7	164	0.0334491	0.368901	ENSSSCG00000005235;ENSSSCG00000011246;ENSSSCG00000012517;ENSSSCG00000015632;ENSSSCG00000026108;ENSSSCG00000028695;ENSSSCG00000039769
GO:1902904	negative regulation of supramolecular fiber organization	BP	6	130	0.0342605	0.368901	ENSSSCG00000002921;ENSSSCG00000005235;ENSSSCG00000006957;ENSSSCG00000011246;ENSSSCG00000012517;ENSSSCG00000028695
GO:0009435	NAD biosynthetic process	BP	2	16	0.034658	0.368901	ENSSSCG00000033636;ENSSSCG00000038660
GO:0043567	regulation of insulin-like growth factor receptor signaling pathway	BP	2	16	0.034658	0.368901	ENSSSCG00000004928;ENSSSCG00000023162
GO:0031346	positive regulation of cell projection organization	BP	8	202	0.0350342	0.368901	ENSSSCG00000000135;ENSSSCG00000008118;ENSSSCG00000009649;ENSSSCG00000009860;ENSSSCG00000016522;ENSSSCG00000024674;ENSSSCG00000026108;ENSSSCG00000036520
GO:0060711	labyrinthine layer development	BP	3	39	0.0353204	0.368901	ENSSSCG00000009860;ENSSSCG00000012409;ENSSSCG00000013408
GO:0051341	regulation of oxidoreductase activity	BP	4	67	0.0357357	0.368901	ENSSSCG00000001987;ENSSSCG00000012437;ENSSSCG00000023162;ENSSSCG00000024674
GO:0051493	regulation of cytoskeleton organization	BP	14	441	0.0362474	0.368901	ENSSSCG00000002921;ENSSSCG00000005235;ENSSSCG00000006957;ENSSSCG00000011246;ENSSSCG00000012392;ENSSSCG00000012517;ENSSSCG00000014214;ENSSSCG00000026108;ENSSSCG00000028359;ENSSSCG00000028695;ENSSSCG00000032297;ENSSSCG00000036520;ENSSSCG00000038679;ENSSSCG00000039769
GO:0000017	alpha-glucoside transport	BP	1	2	0.0367439	0.368901	ENSSSCG00000024058
GO:0001905	activation of membrane attack complex	BP	1	2	0.0367439	0.368901	ENSSSCG00000024791
GO:0001969	regulation of activation of membrane attack complex	BP	1	2	0.0367439	0.368901	ENSSSCG00000024791
GO:0002419	T cell mediated cytotoxicity directed against tumor cell target	BP	1	2	0.0367439	0.368901	ENSSSCG00000015540
GO:0002852	regulation of T cell mediated cytotoxicity directed against tumor cell target	BP	1	2	0.0367439	0.368901	ENSSSCG00000015540
GO:0002854	positive regulation of T cell mediated cytotoxicity directed against tumor cell target	BP	1	2	0.0367439	0.368901	ENSSSCG00000015540
GO:0003150	muscular septum morphogenesis	BP	1	2	0.0367439	0.368901	ENSSSCG00000029838
GO:0003195	tricuspid valve formation	BP	1	2	0.0367439	0.368901	ENSSSCG00000040875
GO:0005981	regulation of glycogen catabolic process	BP	1	2	0.0367439	0.368901	ENSSSCG00000022797
GO:0006425	glutaminyl-tRNA aminoacylation	BP	1	2	0.0367439	0.368901	ENSSSCG00000014411
GO:0006429	leucyl-tRNA aminoacylation	BP	1	2	0.0367439	0.368901	ENSSSCG00000014411
GO:0006710	androgen catabolic process	BP	1	2	0.0367439	0.368901	ENSSSCG00000009225
GO:0006772	thiamine metabolic process	BP	1	2	0.0367439	0.368901	ENSSSCG00000015462
GO:0009229	thiamine diphosphate biosynthetic process	BP	1	2	0.0367439	0.368901	ENSSSCG00000015462
GO:0009698	phenylpropanoid metabolic process	BP	1	2	0.0367439	0.368901	ENSSSCG00000000046
GO:0009804	coumarin metabolic process	BP	1	2	0.0367439	0.368901	ENSSSCG00000000046
GO:0014846	esophagus smooth muscle contraction	BP	1	2	0.0367439	0.368901	ENSSSCG00000007456
GO:0017126	nucleologenesis	BP	1	2	0.0367439	0.368901	ENSSSCG00000026812
GO:0019085	early viral transcription	BP	1	2	0.0367439	0.368901	ENSSSCG00000002701
GO:0019264	glycine biosynthetic process from serine	BP	1	2	0.0367439	0.368901	ENSSSCG00000036208
GO:0021682	nerve maturation	BP	1	2	0.0367439	0.368901	ENSSSCG00000002450
GO:0030185	nitric oxide transport	BP	1	2	0.0367439	0.368901	ENSSSCG00000033190
GO:0030451	regulation of complement activation, alternative pathway	BP	1	2	0.0367439	0.368901	ENSSSCG00000035170
GO:0030974	thiamine pyrophosphate transmembrane transport	BP	1	2	0.0367439	0.368901	ENSSSCG00000017208
GO:0032912	negative regulation of transforming growth factor beta2 production	BP	1	2	0.0367439	0.368901	ENSSSCG00000023162
GO:0034224	cellular response to zinc ion starvation	BP	1	2	0.0367439	0.368901	ENSSSCG00000000385
GO:0034378	chylomicron assembly	BP	1	2	0.0367439	0.368901	ENSSSCG00000007243
GO:0035038	female pronucleus assembly	BP	1	2	0.0367439	0.368901	ENSSSCG00000016489
GO:0035623	renal glucose absorption	BP	1	2	0.0367439	0.368901	ENSSSCG00000024058
GO:0035698	CD8-positive, alpha-beta cytotoxic T cell extravasation	BP	1	2	0.0367439	0.368901	ENSSSCG00000001987
GO:0036245	cellular response to menadione	BP	1	2	0.0367439	0.368901	ENSSSCG00000005859
GO:0038155	interleukin-23-mediated signaling pathway	BP	1	2	0.0367439	0.368901	ENSSSCG00000003801
GO:0042496	detection of diacyl bacterial lipopeptide	BP	1	2	0.0367439	0.368901	ENSSSCG00000026592
GO:0042710	biofilm formation	BP	1	2	0.0367439	0.368901	ENSSSCG00000029879
GO:0042724	thiamine-containing compound biosynthetic process	BP	1	2	0.0367439	0.368901	ENSSSCG00000015462
GO:0042819	vitamin B6 biosynthetic process	BP	1	2	0.0367439	0.368901	ENSSSCG00000034758
GO:0042823	pyridoxal phosphate biosynthetic process	BP	1	2	0.0367439	0.368901	ENSSSCG00000034758
GO:0043152	induction of bacterial agglutination	BP	1	2	0.0367439	0.368901	ENSSSCG00000010334
GO:0044010	single-species biofilm formation	BP	1	2	0.0367439	0.368901	ENSSSCG00000029879
GO:0044269	glycerol ether catabolic process	BP	1	2	0.0367439	0.368901	ENSSSCG00000040569
GO:0044407	single-species biofilm formation in or on host organism	BP	1	2	0.0367439	0.368901	ENSSSCG00000029879
GO:0044866	modulation by host of viral exo-alpha-sialidase activity	BP	1	2	0.0367439	0.368901	ENSSSCG00000011727
GO:0044867	modulation by host of viral catalytic activity	BP	1	2	0.0367439	0.368901	ENSSSCG00000011727
GO:0044869	negative regulation by host of viral exo-alpha-sialidase activity	BP	1	2	0.0367439	0.368901	ENSSSCG00000011727
GO:0044870	modulation by host of viral glycoprotein metabolic process	BP	1	2	0.0367439	0.368901	ENSSSCG00000011727
GO:0044871	negative regulation by host of viral glycoprotein metabolic process	BP	1	2	0.0367439	0.368901	ENSSSCG00000011727
GO:0045957	negative regulation of complement activation, alternative pathway	BP	1	2	0.0367439	0.368901	ENSSSCG00000035170
GO:0046878	positive regulation of saliva secretion	BP	1	2	0.0367439	0.368901	ENSSSCG00000033190
GO:0046900	tetrahydrofolylpolyglutamate metabolic process	BP	1	2	0.0367439	0.368901	ENSSSCG00000037637
GO:0048388	endosomal lumen acidification	BP	1	2	0.0367439	0.368901	ENSSSCG00000027928
GO:0048817	negative regulation of hair follicle maturation	BP	1	2	0.0367439	0.368901	ENSSSCG00000023162
GO:0051673	membrane disruption in other organism	BP	1	2	0.0367439	0.368901	ENSSSCG00000029879
GO:0051977	lysophospholipid transport	BP	1	2	0.0367439	0.368901	ENSSSCG00000040569
GO:0060003	copper ion export	BP	1	2	0.0367439	0.368901	ENSSSCG00000012437
GO:0060764	cell-cell signaling involved in mammary gland development	BP	1	2	0.0367439	0.368901	ENSSSCG00000012885
GO:0061582	intestinal epithelial cell migration	BP	1	2	0.0367439	0.368901	ENSSSCG00000038535
GO:0062234	platelet activating factor catabolic process	BP	1	2	0.0367439	0.368901	ENSSSCG00000040569
GO:0070171	negative regulation of tooth mineralization	BP	1	2	0.0367439	0.368901	ENSSSCG00000008072
GO:0070649	formin-nucleated actin cable assembly	BP	1	2	0.0367439	0.368901	ENSSSCG00000039769
GO:0070881	regulation of proline transport	BP	1	2	0.0367439	0.368901	ENSSSCG00000035893
GO:0071104	response to interleukin-9	BP	1	2	0.0367439	0.368901	ENSSSCG00000012409
GO:0071105	response to interleukin-11	BP	1	2	0.0367439	0.368901	ENSSSCG00000012409
GO:0071486	cellular response to high light intensity	BP	1	2	0.0367439	0.368901	ENSSSCG00000002450
GO:0072237	metanephric proximal tubule development	BP	1	2	0.0367439	0.368901	ENSSSCG00000033190
GO:0072535	tumor necrosis factor (ligand) superfamily member 11 production	BP	1	2	0.0367439	0.368901	ENSSSCG00000010772
GO:0090182	regulation of secretion of lysosomal enzymes	BP	1	2	0.0367439	0.368901	ENSSSCG00000013241
GO:0090345	cellular organohalogen metabolic process	BP	1	2	0.0367439	0.368901	ENSSSCG00000000046
GO:0090346	cellular organofluorine metabolic process	BP	1	2	0.0367439	0.368901	ENSSSCG00000000046
GO:0097528	execution phase of necroptosis	BP	1	2	0.0367439	0.368901	ENSSSCG00000001987
GO:0098630	aggregation of unicellular organisms	BP	1	2	0.0367439	0.368901	ENSSSCG00000029879
GO:0110009	formin-nucleated actin cable organization	BP	1	2	0.0367439	0.368901	ENSSSCG00000039769
GO:0120127	response to zinc ion starvation	BP	1	2	0.0367439	0.368901	ENSSSCG00000000385
GO:1900190	regulation of single-species biofilm formation	BP	1	2	0.0367439	0.368901	ENSSSCG00000029879
GO:1900191	negative regulation of single-species biofilm formation	BP	1	2	0.0367439	0.368901	ENSSSCG00000029879
GO:1900228	regulation of single-species biofilm formation in or on host organism	BP	1	2	0.0367439	0.368901	ENSSSCG00000029879
GO:1900229	negative regulation of single-species biofilm formation in or on host organism	BP	1	2	0.0367439	0.368901	ENSSSCG00000029879
GO:1901502	ether catabolic process	BP	1	2	0.0367439	0.368901	ENSSSCG00000040569
GO:1902359	Notch signaling pathway involved in somitogenesis	BP	1	2	0.0367439	0.368901	ENSSSCG00000007572
GO:1902366	regulation of Notch signaling pathway involved in somitogenesis	BP	1	2	0.0367439	0.368901	ENSSSCG00000007572
GO:1902367	negative regulation of Notch signaling pathway involved in somitogenesis	BP	1	2	0.0367439	0.368901	ENSSSCG00000007572
GO:1902834	regulation of proline import across plasma membrane	BP	1	2	0.0367439	0.368901	ENSSSCG00000035893
GO:1902836	positive regulation of proline import across plasma membrane	BP	1	2	0.0367439	0.368901	ENSSSCG00000035893
GO:1903015	regulation of exo-alpha-sialidase activity	BP	1	2	0.0367439	0.368901	ENSSSCG00000011727
GO:1903016	negative regulation of exo-alpha-sialidase activity	BP	1	2	0.0367439	0.368901	ENSSSCG00000011727
GO:1903998	regulation of eating behavior	BP	1	2	0.0367439	0.368901	ENSSSCG00000002450
GO:1904155	DN2 thymocyte differentiation	BP	1	2	0.0367439	0.368901	ENSSSCG00000009540
GO:1904395	positive regulation of skeletal muscle acetylcholine-gated channel clustering	BP	1	2	0.0367439	0.368901	ENSSSCG00000013248
GO:1905024	regulation of membrane repolarization during ventricular cardiac muscle cell action potential	BP	1	2	0.0367439	0.368901	ENSSSCG00000029323
GO:1905031	regulation of membrane repolarization during cardiac muscle cell action potential	BP	1	2	0.0367439	0.368901	ENSSSCG00000029323
GO:1905271	regulation of proton-transporting ATP synthase activity, rotational mechanism	BP	1	2	0.0367439	0.368901	ENSSSCG00000036387
GO:1905273	positive regulation of proton-transporting ATP synthase activity, rotational mechanism	BP	1	2	0.0367439	0.368901	ENSSSCG00000036387
GO:1905735	regulation of L-proline import across plasma membrane	BP	1	2	0.0367439	0.368901	ENSSSCG00000035893
GO:1905737	positive regulation of L-proline import across plasma membrane	BP	1	2	0.0367439	0.368901	ENSSSCG00000035893
GO:1990764	myofibroblast contraction	BP	1	2	0.0367439	0.368901	ENSSSCG00000020963
GO:1990834	response to odorant	BP	1	2	0.0367439	0.368901	ENSSSCG00000002450
GO:2000276	negative regulation of oxidative phosphorylation uncoupler activity	BP	1	2	0.0367439	0.368901	ENSSSCG00000010330
GO:2000307	regulation of tumor necrosis factor (ligand) superfamily member 11 production	BP	1	2	0.0367439	0.368901	ENSSSCG00000010772
GO:2000309	positive regulation of tumor necrosis factor (ligand) superfamily member 11 production	BP	1	2	0.0367439	0.368901	ENSSSCG00000010772
GO:2000382	positive regulation of mesoderm development	BP	1	2	0.0367439	0.368901	ENSSSCG00000002906
GO:2000393	negative regulation of lamellipodium morphogenesis	BP	1	2	0.0367439	0.368901	ENSSSCG00000005235
GO:2000418	positive regulation of eosinophil migration	BP	1	2	0.0367439	0.368901	ENSSSCG00000010772
GO:2000452	regulation of CD8-positive, alpha-beta cytotoxic T cell extravasation	BP	1	2	0.0367439	0.368901	ENSSSCG00000001987
GO:2001287	negative regulation of caveolin-mediated endocytosis	BP	1	2	0.0367439	0.368901	ENSSSCG00000008118
GO:0008757	S-adenosylmethionine-dependent methyltransferase activity	MF	5	155	0.158757	0.370122	ENSSSCG00000001073;ENSSSCG00000026812;ENSSSCG00000033766;ENSSSCG00000036387;ENSSSCG00000039712
GO:0001824	blastocyst development	BP	5	99	0.0370621	0.371111	ENSSSCG00000002144;ENSSSCG00000002906;ENSSSCG00000026472;ENSSSCG00000026812;ENSSSCG00000034727
GO:0033993	response to lipid	BP	14	443	0.0374232	0.371897	ENSSSCG00000000978;ENSSSCG00000003801;ENSSSCG00000007492;ENSSSCG00000012409;ENSSSCG00000013241;ENSSSCG00000015828;ENSSSCG00000016533;ENSSSCG00000024674;ENSSSCG00000025578;ENSSSCG00000029879;ENSSSCG00000033190;ENSSSCG00000034213;ENSSSCG00000036427;ENSSSCG00000036520
GO:0042116	macrophage activation	BP	4	68	0.0374353	0.371897	ENSSSCG00000005203;ENSSSCG00000013241;ENSSSCG00000035170;ENSSSCG00000040569
GO:0042542	response to hydrogen peroxide	BP	4	68	0.0374353	0.371897	ENSSSCG00000001987;ENSSSCG00000010330;ENSSSCG00000021355;ENSSSCG00000033190
GO:0008509	anion transmembrane transporter activity	MF	8	288	0.163955	0.372929	ENSSSCG00000002450;ENSSSCG00000006932;ENSSSCG00000011641;ENSSSCG00000015949;ENSSSCG00000023918;ENSSSCG00000024018;ENSSSCG00000027118;ENSSSCG00000038275
GO:0030545	signaling receptor regulator activity	MF	11	426	0.165146	0.372929	ENSSSCG00000005152;ENSSSCG00000005203;ENSSSCG00000005216;ENSSSCG00000007079;ENSSSCG00000012490;ENSSSCG00000013408;ENSSSCG00000014310;ENSSSCG00000016522;ENSSSCG00000031075;ENSSSCG00000036520;ENSSSCG00000036893
GO:0016616	oxidoreductase activity, acting on the CH-OH group of donors, NAD or NADP as acceptor	MF	4	116	0.1665	0.372929	ENSSSCG00000014080;ENSSSCG00000015930;ENSSSCG00000020706;ENSSSCG00000032557
GO:0016798	hydrolase activity, acting on glycosyl bonds	MF	4	116	0.1665	0.372929	ENSSSCG00000016601;ENSSSCG00000021638;ENSSSCG00000028359;ENSSSCG00000034213
GO:0003755	peptidyl-prolyl cis-trans isomerase activity	MF	2	40	0.167879	0.372929	ENSSSCG00000010330;ENSSSCG00000031128
GO:0022839	ion gated channel activity	MF	2	40	0.167879	0.372929	ENSSSCG00000004701;ENSSSCG00000006932
GO:0004708	MAP kinase kinase activity	MF	1	10	0.169811	0.372929	ENSSSCG00000017254
GO:0005432	calcium:sodium antiporter activity	MF	1	10	0.169811	0.372929	ENSSSCG00000002450
GO:0010340	carboxyl-O-methyltransferase activity	MF	1	10	0.169811	0.372929	ENSSSCG00000039712
GO:0015386	potassium:proton antiporter activity	MF	1	10	0.169811	0.372929	ENSSSCG00000023918
GO:0016594	glycine binding	MF	1	10	0.169811	0.372929	ENSSSCG00000005199
GO:0016812	hydrolase activity, acting on carbon-nitrogen (but not peptide) bonds, in cyclic amides	MF	1	10	0.169811	0.372929	ENSSSCG00000029761
GO:0016846	carbon-sulfur lyase activity	MF	1	10	0.169811	0.372929	ENSSSCG00000031736
GO:0034595	phosphatidylinositol phosphate 5-phosphatase activity	MF	1	10	0.169811	0.372929	ENSSSCG00000012315
GO:0051998	protein carboxyl O-methyltransferase activity	MF	1	10	0.169811	0.372929	ENSSSCG00000039712
GO:0070410	co-SMAD binding	MF	1	10	0.169811	0.372929	ENSSSCG00000012409
GO:0071714	icosanoid transmembrane transporter activity	MF	1	10	0.169811	0.372929	ENSSSCG00000011641
GO:0071837	HMG box domain binding	MF	1	10	0.169811	0.372929	ENSSSCG00000038993
GO:0097573	glutathione oxidoreductase activity	MF	1	10	0.169811	0.372929	ENSSSCG00000023929
GO:1901474	azole transmembrane transporter activity	MF	1	10	0.169811	0.372929	ENSSSCG00000017208
GO:1902282	voltage-gated potassium channel activity involved in ventricular cardiac muscle cell action potential repolarization	MF	1	10	0.169811	0.372929	ENSSSCG00000029323
GO:0098772	molecular function regulator	MF	34	1557	0.170319	0.373012	ENSSSCG00000000884;ENSSSCG00000001987;ENSSSCG00000002479;ENSSSCG00000004065;ENSSSCG00000005152;ENSSSCG00000005203;ENSSSCG00000005216;ENSSSCG00000007079;ENSSSCG00000007384;ENSSSCG00000007760;ENSSSCG00000010840;ENSSSCG00000011363;ENSSSCG00000012490;ENSSSCG00000012960;ENSSSCG00000013408;ENSSSCG00000014310;ENSSSCG00000014411;ENSSSCG00000015083;ENSSSCG00000016522;ENSSSCG00000017254;ENSSSCG00000017328;…
GO:0042886	amide transport	BP	8	205	0.0377066	0.373612	ENSSSCG00000012885;ENSSSCG00000016682;ENSSSCG00000031423;ENSSSCG00000033190;ENSSSCG00000034114;ENSSSCG00000035893;ENSSSCG00000036520;ENSSSCG00000042162
GO:0043009	chordate embryonic development	BP	17	572	0.0385461	0.374704	ENSSSCG00000000884;ENSSSCG00000002144;ENSSSCG00000002906;ENSSSCG00000006051;ENSSSCG00000007456;ENSSSCG00000007572;ENSSSCG00000009540;ENSSSCG00000009860;ENSSSCG00000012409;ENSSSCG00000013408;ENSSSCG00000025578;ENSSSCG00000026472;ENSSSCG00000026812;ENSSSCG00000029838;ENSSSCG00000034474;ENSSSCG00000034727;ENSSSCG00000038993
GO:0002921	negative regulation of humoral immune response	BP	2	17	0.0388069	0.374704	ENSSSCG00000024791;ENSSSCG00000035170
GO:0006568	tryptophan metabolic process	BP	2	17	0.0388069	0.374704	ENSSSCG00000033636;ENSSSCG00000038660
GO:0006586	indolalkylamine metabolic process	BP	2	17	0.0388069	0.374704	ENSSSCG00000033636;ENSSSCG00000038660
GO:0010155	regulation of proton transport	BP	2	17	0.0388069	0.374704	ENSSSCG00000010330;ENSSSCG00000036387
GO:0030449	regulation of complement activation	BP	2	17	0.0388069	0.374704	ENSSSCG00000024791;ENSSSCG00000035170
GO:0032892	positive regulation of organic acid transport	BP	2	17	0.0388069	0.374704	ENSSSCG00000035893;ENSSSCG00000040569
GO:0034143	regulation of toll-like receptor 4 signaling pathway	BP	2	17	0.0388069	0.374704	ENSSSCG00000013241;ENSSSCG00000029879
GO:0042573	retinoic acid metabolic process	BP	2	17	0.0388069	0.374704	ENSSSCG00000015930;ENSSSCG00000025578
GO:0090103	cochlea morphogenesis	BP	2	17	0.0388069	0.374704	ENSSSCG00000006051;ENSSSCG00000029838
GO:0015085	calcium ion transmembrane transporter activity	MF	4	118	0.173682	0.379334	ENSSSCG00000002450;ENSSSCG00000012386;ENSSSCG00000015543;ENSSSCG00000023912
GO:0050709	negative regulation of protein secretion	BP	3	41	0.0401096	0.382054	ENSSSCG00000013241;ENSSSCG00000014080;ENSSSCG00000042162
GO:0007281	germ cell development	BP	9	247	0.0413241	0.382054	ENSSSCG00000002144;ENSSSCG00000004701;ENSSSCG00000007382;ENSSSCG00000011727;ENSSSCG00000016489;ENSSSCG00000016522;ENSSSCG00000016533;ENSSSCG00000016579;ENSSSCG00000029990
GO:0009792	embryo development ending in birth or egg hatching	BP	17	579	0.0423991	0.382054	ENSSSCG00000000884;ENSSSCG00000002144;ENSSSCG00000002906;ENSSSCG00000006051;ENSSSCG00000007456;ENSSSCG00000007572;ENSSSCG00000009540;ENSSSCG00000009860;ENSSSCG00000012409;ENSSSCG00000013408;ENSSSCG00000025578;ENSSSCG00000026472;ENSSSCG00000026812;ENSSSCG00000029838;ENSSSCG00000034474;ENSSSCG00000034727;ENSSSCG00000038993
GO:0045646	regulation of erythrocyte differentiation	BP	3	42	0.0426211	0.382054	ENSSSCG00000007492;ENSSSCG00000010188;ENSSSCG00000040875
GO:0002251	organ or tissue specific immune response	BP	2	18	0.0431338	0.382054	ENSSSCG00000029879;ENSSSCG00000029990
GO:0006144	purine nucleobase metabolic process	BP	2	18	0.0431338	0.382054	ENSSSCG00000029761;ENSSSCG00000036208
GO:0006907	pinocytosis	BP	2	18	0.0431338	0.382054	ENSSSCG00000008118;ENSSSCG00000013241
GO:0008209	androgen metabolic process	BP	2	18	0.0431338	0.382054	ENSSSCG00000009225;ENSSSCG00000015930
GO:0018904	ether metabolic process	BP	2	18	0.0431338	0.382054	ENSSSCG00000028144;ENSSSCG00000040569
GO:0019359	nicotinamide nucleotide biosynthetic process	BP	2	18	0.0431338	0.382054	ENSSSCG00000033636;ENSSSCG00000038660
GO:0019363	pyridine nucleotide biosynthetic process	BP	2	18	0.0431338	0.382054	ENSSSCG00000033636;ENSSSCG00000038660
GO:0046514	ceramide catabolic process	BP	2	18	0.0431338	0.382054	ENSSSCG00000021638;ENSSSCG00000034213
GO:0070293	renal absorption	BP	2	18	0.0431338	0.382054	ENSSSCG00000024058;ENSSSCG00000033190
GO:0060828	regulation of canonical Wnt signaling pathway	BP	8	211	0.0434549	0.382054	ENSSSCG00000005235;ENSSSCG00000006051;ENSSSCG00000007456;ENSSSCG00000013248;ENSSSCG00000023162;ENSSSCG00000027928;ENSSSCG00000028995;ENSSSCG00000029843
GO:0031344	regulation of cell projection organization	BP	13	411	0.0436265	0.382054	ENSSSCG00000000135;ENSSSCG00000005235;ENSSSCG00000008118;ENSSSCG00000009649;ENSSSCG00000009860;ENSSSCG00000013248;ENSSSCG00000016522;ENSSSCG00000023788;ENSSSCG00000024674;ENSSSCG00000026108;ENSSSCG00000032423;ENSSSCG00000036520;ENSSSCG00000039977
GO:0015711	organic anion transport	BP	10	289	0.0437538	0.382054	ENSSSCG00000011641;ENSSSCG00000015949;ENSSSCG00000016682;ENSSSCG00000017208;ENSSSCG00000017925;ENSSSCG00000017926;ENSSSCG00000024018;ENSSSCG00000027118;ENSSSCG00000035893;ENSSSCG00000040569
GO:0032956	regulation of actin cytoskeleton organization	BP	10	289	0.0437538	0.382054	ENSSSCG00000005235;ENSSSCG00000006957;ENSSSCG00000011246;ENSSSCG00000012392;ENSSSCG00000012517;ENSSSCG00000026108;ENSSSCG00000028359;ENSSSCG00000028695;ENSSSCG00000036520;ENSSSCG00000039769
GO:0043086	negative regulation of catalytic activity	BP	17	582	0.0441326	0.382054	ENSSSCG00000002479;ENSSSCG00000007384;ENSSSCG00000010330;ENSSSCG00000010334;ENSSSCG00000011363;ENSSSCG00000011727;ENSSSCG00000012885;ENSSSCG00000012960;ENSSSCG00000014080;ENSSSCG00000015136;ENSSSCG00000016489;ENSSSCG00000028871;ENSSSCG00000029879;ENSSSCG00000032423;ENSSSCG00000033190;ENSSSCG00000033586;ENSSSCG00000040470
GO:0042742	defense response to bacterium	BP	8	212	0.0444661	0.382054	ENSSSCG00000007384;ENSSSCG00000010334;ENSSSCG00000015540;ENSSSCG00000029879;ENSSSCG00000029990;ENSSSCG00000033190;ENSSSCG00000034792;ENSSSCG00000040998
GO:0022412	cellular process involved in reproduction in multicellular organism	BP	11	330	0.0444843	0.382054	ENSSSCG00000002144;ENSSSCG00000004701;ENSSSCG00000007382;ENSSSCG00000011727;ENSSSCG00000016489;ENSSSCG00000016522;ENSSSCG00000016533;ENSSSCG00000016579;ENSSSCG00000016601;ENSSSCG00000029990;ENSSSCG00000039769
GO:0006629	lipid metabolic process	BP	28	1077	0.0445819	0.382054	ENSSSCG00000000046;ENSSSCG00000001078;ENSSSCG00000004233;ENSSSCG00000007243;ENSSSCG00000008233;ENSSSCG00000008640;ENSSSCG00000009225;ENSSSCG00000012315;ENSSSCG00000012885;ENSSSCG00000013241;ENSSSCG00000014080;ENSSSCG00000015268;ENSSSCG00000015930;ENSSSCG00000021355;ENSSSCG00000021638;ENSSSCG00000025578;ENSSSCG00000028010;ENSSSCG00000029291;ENSSSCG00000031736;ENSSSCG00000032481;ENSSSCG00000033993;…
GO:0018208	peptidyl-proline modification	BP	3	43	0.0452096	0.382054	ENSSSCG00000010330;ENSSSCG00000025953;ENSSSCG00000031128
GO:0097300	programmed necrotic cell death	BP	3	43	0.0452096	0.382054	ENSSSCG00000001987;ENSSSCG00000009140;ENSSSCG00000010330
GO:0006643	membrane lipid metabolic process	BP	7	176	0.0460637	0.382054	ENSSSCG00000004233;ENSSSCG00000021638;ENSSSCG00000029291;ENSSSCG00000031736;ENSSSCG00000032481;ENSSSCG00000034213;ENSSSCG00000038329
GO:0006644	phospholipid metabolic process	BP	11	332	0.0461017	0.382054	ENSSSCG00000001078;ENSSSCG00000004233;ENSSSCG00000008233;ENSSSCG00000012315;ENSSSCG00000013241;ENSSSCG00000028010;ENSSSCG00000029291;ENSSSCG00000032481;ENSSSCG00000036808;ENSSSCG00000038329;ENSSSCG00000040569
GO:0043523	regulation of neuron apoptotic process	BP	6	140	0.0463914	0.382054	ENSSSCG00000009540;ENSSSCG00000009649;ENSSSCG00000010772;ENSSSCG00000012409;ENSSSCG00000016792;ENSSSCG00000021355
GO:0042475	odontogenesis of dentin-containing tooth	BP	4	73	0.0466198	0.382054	ENSSSCG00000002450;ENSSSCG00000009220;ENSSSCG00000013248;ENSSSCG00000034792
GO:0071333	cellular response to glucose stimulus	BP	4	73	0.0466198	0.382054	ENSSSCG00000012885;ENSSSCG00000034114;ENSSSCG00000035893;ENSSSCG00000036520
GO:0003094	glomerular filtration	BP	2	19	0.0476307	0.382054	ENSSSCG00000007456;ENSSSCG00000033190
GO:0046931	pore complex assembly	BP	2	19	0.0476307	0.382054	ENSSSCG00000016570;ENSSSCG00000028464
GO:0071392	cellular response to estradiol stimulus	BP	2	19	0.0476307	0.382054	ENSSSCG00000007492;ENSSSCG00000015828
GO:0090200	positive regulation of release of cytochrome c from mitochondria	BP	2	19	0.0476307	0.382054	ENSSSCG00000001989;ENSSSCG00000010330
GO:0098719	sodium ion import across plasma membrane	BP	2	19	0.0476307	0.382054	ENSSSCG00000023918;ENSSSCG00000024058
GO:0007018	microtubule-based movement	BP	11	334	0.0477589	0.382054	ENSSSCG00000000139;ENSSSCG00000002921;ENSSSCG00000004701;ENSSSCG00000007814;ENSSSCG00000009649;ENSSSCG00000021355;ENSSSCG00000023918;ENSSSCG00000029843;ENSSSCG00000029990;ENSSSCG00000038057;ENSSSCG00000040416
GO:0051445	regulation of meiotic cell cycle	BP	3	44	0.0478744	0.382054	ENSSSCG00000007572;ENSSSCG00000016489;ENSSSCG00000016533
GO:1901605	alpha-amino acid metabolic process	BP	7	178	0.0484257	0.382054	ENSSSCG00000005199;ENSSSCG00000013065;ENSSSCG00000029945;ENSSSCG00000033636;ENSSSCG00000036208;ENSSSCG00000038660;ENSSSCG00000040203
GO:0001843	neural tube closure	BP	4	74	0.0485939	0.382054	ENSSSCG00000000884;ENSSSCG00000006051;ENSSSCG00000013408;ENSSSCG00000029838
GO:0006650	glycerophospholipid metabolic process	BP	9	255	0.0488118	0.382054	ENSSSCG00000001078;ENSSSCG00000008233;ENSSSCG00000012315;ENSSSCG00000013241;ENSSSCG00000028010;ENSSSCG00000029291;ENSSSCG00000032481;ENSSSCG00000038329;ENSSSCG00000040569
GO:0008643	carbohydrate transport	BP	5	107	0.0490046	0.382054	ENSSSCG00000002921;ENSSSCG00000023915;ENSSSCG00000024058;ENSSSCG00000027118;ENSSSCG00000033190
GO:0031333	negative regulation of protein-containing complex assembly	BP	5	107	0.0490046	0.382054	ENSSSCG00000002921;ENSSSCG00000005235;ENSSSCG00000011246;ENSSSCG00000012517;ENSSSCG00000028695
GO:0032535	regulation of cellular component size	BP	10	295	0.0490438	0.382054	ENSSSCG00000005235;ENSSSCG00000009649;ENSSSCG00000011246;ENSSSCG00000012517;ENSSSCG00000014411;ENSSSCG00000026108;ENSSSCG00000028695;ENSSSCG00000033190;ENSSSCG00000036520;ENSSSCG00000039769
GO:0071396	cellular response to lipid	BP	11	337	0.0503202	0.382054	ENSSSCG00000000978;ENSSSCG00000007492;ENSSSCG00000013241;ENSSSCG00000015828;ENSSSCG00000016533;ENSSSCG00000024674;ENSSSCG00000025578;ENSSSCG00000029879;ENSSSCG00000033190;ENSSSCG00000036427;ENSSSCG00000036520
GO:1901215	negative regulation of neuron death	BP	6	143	0.0504898	0.382054	ENSSSCG00000009540;ENSSSCG00000009649;ENSSSCG00000010772;ENSSSCG00000012409;ENSSSCG00000016792;ENSSSCG00000021355
GO:0033077	T cell differentiation in thymus	BP	4	75	0.0506136	0.382054	ENSSSCG00000001987;ENSSSCG00000009540;ENSSSCG00000010772;ENSSSCG00000015540
GO:0060606	tube closure	BP	4	75	0.0506136	0.382054	ENSSSCG00000000884;ENSSSCG00000006051;ENSSSCG00000013408;ENSSSCG00000029838
GO:0071326	cellular response to monosaccharide stimulus	BP	4	75	0.0506136	0.382054	ENSSSCG00000012885;ENSSSCG00000034114;ENSSSCG00000035893;ENSSSCG00000036520
GO:0071331	cellular response to hexose stimulus	BP	4	75	0.0506136	0.382054	ENSSSCG00000012885;ENSSSCG00000034114;ENSSSCG00000035893;ENSSSCG00000036520
GO:0001541	ovarian follicle development	BP	3	45	0.0506147	0.382054	ENSSSCG00000007572;ENSSSCG00000011727;ENSSSCG00000021355
GO:0006970	response to osmotic stress	BP	3	45	0.0506147	0.382054	ENSSSCG00000000978;ENSSSCG00000023915;ENSSSCG00000033190
GO:2000241	regulation of reproductive process	BP	6	144	0.0519038	0.382054	ENSSSCG00000007572;ENSSSCG00000016489;ENSSSCG00000016533;ENSSSCG00000021355;ENSSSCG00000029990;ENSSSCG00000038057
GO:0001914	regulation of T cell mediated cytotoxicity	BP	2	20	0.0522898	0.382054	ENSSSCG00000001987;ENSSSCG00000015540
GO:0006658	phosphatidylserine metabolic process	BP	2	20	0.0522898	0.382054	ENSSSCG00000001078;ENSSSCG00000040569
GO:0006833	water transport	BP	2	20	0.0522898	0.382054	ENSSSCG00000031423;ENSSSCG00000033190
GO:0010165	response to X-ray	BP	2	20	0.0522898	0.382054	ENSSSCG00000009540;ENSSSCG00000021702
GO:0032770	positive regulation of monooxygenase activity	BP	2	20	0.0522898	0.382054	ENSSSCG00000012437;ENSSSCG00000023162
GO:0042402	cellular biogenic amine catabolic process	BP	2	20	0.0522898	0.382054	ENSSSCG00000033636;ENSSSCG00000038660
GO:0051446	positive regulation of meiotic cell cycle	BP	2	20	0.0522898	0.382054	ENSSSCG00000007572;ENSSSCG00000016533
GO:1903793	positive regulation of anion transport	BP	2	20	0.0522898	0.382054	ENSSSCG00000035893;ENSSSCG00000040569
GO:0030317	flagellated sperm motility	BP	5	109	0.0523059	0.382054	ENSSSCG00000004701;ENSSSCG00000023918;ENSSSCG00000029843;ENSSSCG00000029990;ENSSSCG00000038057
GO:0097722	sperm motility	BP	5	109	0.0523059	0.382054	ENSSSCG00000004701;ENSSSCG00000023918;ENSSSCG00000029843;ENSSSCG00000029990;ENSSSCG00000038057
GO:0003014	renal system process	BP	4	76	0.0526787	0.382054	ENSSSCG00000007456;ENSSSCG00000013408;ENSSSCG00000024058;ENSSSCG00000033190
GO:1901654	response to ketone	BP	4	76	0.0526787	0.382054	ENSSSCG00000005859;ENSSSCG00000013241;ENSSSCG00000033190;ENSSSCG00000036520
GO:0030111	regulation of Wnt signaling pathway	BP	9	259	0.052872	0.382054	ENSSSCG00000005235;ENSSSCG00000006051;ENSSSCG00000007456;ENSSSCG00000008081;ENSSSCG00000013248;ENSSSCG00000023162;ENSSSCG00000027928;ENSSSCG00000028995;ENSSSCG00000029843
GO:0046942	carboxylic acid transport	BP	8	220	0.0531152	0.382054	ENSSSCG00000011641;ENSSSCG00000015949;ENSSSCG00000017925;ENSSSCG00000017926;ENSSSCG00000024018;ENSSSCG00000027118;ENSSSCG00000035893;ENSSSCG00000040569
GO:0055085	transmembrane transport	BP	34	1378	0.0533336	0.382054	ENSSSCG00000000385;ENSSSCG00000002450;ENSSSCG00000002921;ENSSSCG00000004701;ENSSSCG00000006932;ENSSSCG00000010188;ENSSSCG00000010330;ENSSSCG00000010960;ENSSSCG00000011641;ENSSSCG00000012386;ENSSSCG00000012394;ENSSSCG00000012437;ENSSSCG00000015136;ENSSSCG00000015543;ENSSSCG00000015949;ENSSSCG00000016517;ENSSSCG00000017208;ENSSSCG00000017256;ENSSSCG00000017925;ENSSSCG00000017926;ENSSSCG00000023912;…
GO:0006753	nucleoside phosphate metabolic process	BP	13	425	0.0541951	0.382054	ENSSSCG00000002504;ENSSSCG00000002557;ENSSSCG00000004233;ENSSSCG00000005627;ENSSSCG00000011169;ENSSSCG00000014080;ENSSSCG00000028210;ENSSSCG00000033636;ENSSSCG00000034213;ENSSSCG00000036387;ENSSSCG00000036808;ENSSSCG00000037559;ENSSSCG00000038660
GO:0044255	cellular lipid metabolic process	BP	22	822	0.0544169	0.382054	ENSSSCG00000000046;ENSSSCG00000001078;ENSSSCG00000004233;ENSSSCG00000008233;ENSSSCG00000012315;ENSSSCG00000013241;ENSSSCG00000014080;ENSSSCG00000015268;ENSSSCG00000015930;ENSSSCG00000021638;ENSSSCG00000025578;ENSSSCG00000028010;ENSSSCG00000029291;ENSSSCG00000031736;ENSSSCG00000032481;ENSSSCG00000034213;ENSSSCG00000036808;ENSSSCG00000037559;ENSSSCG00000038329;ENSSSCG00000039244;ENSSSCG00000040416;…
GO:0003192	mitral valve formation	BP	1	3	0.054608	0.382054	ENSSSCG00000040875
GO:0009644	response to high light intensity	BP	1	3	0.054608	0.382054	ENSSSCG00000002450
GO:0009820	alkaloid metabolic process	BP	1	3	0.054608	0.382054	ENSSSCG00000000046
GO:0010142	farnesyl diphosphate biosynthetic process, mevalonate pathway	BP	1	3	0.054608	0.382054	ENSSSCG00000036808
GO:0010724	regulation of definitive erythrocyte differentiation	BP	1	3	0.054608	0.382054	ENSSSCG00000040875
GO:0014012	peripheral nervous system axon regeneration	BP	1	3	0.054608	0.382054	ENSSSCG00000009649
GO:0015855	pyrimidine nucleobase transport	BP	1	3	0.054608	0.382054	ENSSSCG00000010960
GO:0016098	monoterpenoid metabolic process	BP	1	3	0.054608	0.382054	ENSSSCG00000000046
GO:0019086	late viral transcription	BP	1	3	0.054608	0.382054	ENSSSCG00000002701
GO:0019732	antifungal humoral response	BP	1	3	0.054608	0.382054	ENSSSCG00000029879
GO:0030950	establishment or maintenance of actin cytoskeleton polarity	BP	1	3	0.054608	0.382054	ENSSSCG00000033190
GO:0032470	positive regulation of endoplasmic reticulum calcium ion concentration	BP	1	3	0.054608	0.382054	ENSSSCG00000009524
GO:0033183	negative regulation of histone ubiquitination	BP	1	3	0.054608	0.382054	ENSSSCG00000002469
GO:0033326	cerebrospinal fluid secretion	BP	1	3	0.054608	0.382054	ENSSSCG00000033190
GO:0035377	transepithelial water transport	BP	1	3	0.054608	0.382054	ENSSSCG00000033190
GO:0035621	ER to Golgi ceramide transport	BP	1	3	0.054608	0.382054	ENSSSCG00000016682
GO:0035697	CD8-positive, alpha-beta T cell extravasation	BP	1	3	0.054608	0.382054	ENSSSCG00000001987
GO:0035799	ureter maturation	BP	1	3	0.054608	0.382054	ENSSSCG00000025578
GO:0038169	somatostatin receptor signaling pathway	BP	1	3	0.054608	0.382054	ENSSSCG00000001938
GO:0038170	somatostatin signaling pathway	BP	1	3	0.054608	0.382054	ENSSSCG00000001938
GO:0042078	germ-line stem cell division	BP	1	3	0.054608	0.382054	ENSSSCG00000016533
GO:0042126	nitrate metabolic process	BP	1	3	0.054608	0.382054	ENSSSCG00000010826
GO:0042357	thiamine diphosphate metabolic process	BP	1	3	0.054608	0.382054	ENSSSCG00000015462
GO:0042427	serotonin biosynthetic process	BP	1	3	0.054608	0.382054	ENSSSCG00000022009
GO:0042637	catagen	BP	1	3	0.054608	0.382054	ENSSSCG00000023162
GO:0042723	thiamine-containing compound metabolic process	BP	1	3	0.054608	0.382054	ENSSSCG00000015462
GO:0042816	vitamin B6 metabolic process	BP	1	3	0.054608	0.382054	ENSSSCG00000034758
GO:0042822	pyridoxal phosphate metabolic process	BP	1	3	0.054608	0.382054	ENSSSCG00000034758
GO:0042946	glucoside transport	BP	1	3	0.054608	0.382054	ENSSSCG00000024058
GO:0043420	anthranilate metabolic process	BP	1	3	0.054608	0.382054	ENSSSCG00000038660
GO:0043490	malate-aspartate shuttle	BP	1	3	0.054608	0.382054	ENSSSCG00000015949
GO:0044868	modulation by host of viral molecular function	BP	1	3	0.054608	0.382054	ENSSSCG00000011727
GO:0045541	negative regulation of cholesterol biosynthetic process	BP	1	3	0.054608	0.382054	ENSSSCG00000021355
GO:0046073	dTMP metabolic process	BP	1	3	0.054608	0.382054	ENSSSCG00000028210
GO:0046985	positive regulation of hemoglobin biosynthetic process	BP	1	3	0.054608	0.382054	ENSSSCG00000010188
GO:0048133	male germ-line stem cell asymmetric division	BP	1	3	0.054608	0.382054	ENSSSCG00000016533
GO:0051410	detoxification of nitrogen compound	BP	1	3	0.054608	0.382054	ENSSSCG00000010826
GO:0051601	exocyst localization	BP	1	3	0.054608	0.382054	ENSSSCG00000036871
GO:0051794	regulation of timing of catagen	BP	1	3	0.054608	0.382054	ENSSSCG00000023162
GO:0060157	urinary bladder development	BP	1	3	0.054608	0.382054	ENSSSCG00000031423
GO:0060319	primitive erythrocyte differentiation	BP	1	3	0.054608	0.382054	ENSSSCG00000040875
GO:0060375	regulation of mast cell differentiation	BP	1	3	0.054608	0.382054	ENSSSCG00000040875
GO:0060474	positive regulation of flagellated sperm motility involved in capacitation	BP	1	3	0.054608	0.382054	ENSSSCG00000029990
GO:0061182	negative regulation of chondrocyte development	BP	1	3	0.054608	0.382054	ENSSSCG00000036893
GO:0070235	regulation of activation-induced cell death of T cells	BP	1	3	0.054608	0.382054	ENSSSCG00000001987
GO:0070340	detection of bacterial lipopeptide	BP	1	3	0.054608	0.382054	ENSSSCG00000026592
GO:0070458	cellular detoxification of nitrogen compound	BP	1	3	0.054608	0.382054	ENSSSCG00000010826
GO:0070995	NADPH oxidation	BP	1	3	0.054608	0.382054	ENSSSCG00000015268
GO:0071288	cellular response to mercury ion	BP	1	3	0.054608	0.382054	ENSSSCG00000033190
GO:0071724	response to diacyl bacterial lipopeptide	BP	1	3	0.054608	0.382054	ENSSSCG00000026592
GO:0071726	cellular response to diacyl bacterial lipopeptide	BP	1	3	0.054608	0.382054	ENSSSCG00000026592
GO:0071732	cellular response to nitric oxide	BP	1	3	0.054608	0.382054	ENSSSCG00000033190
GO:0072139	glomerular parietal epithelial cell differentiation	BP	1	3	0.054608	0.382054	ENSSSCG00000008745
GO:0072733	response to staurosporine	BP	1	3	0.054608	0.382054	ENSSSCG00000009140
GO:0072734	cellular response to staurosporine	BP	1	3	0.054608	0.382054	ENSSSCG00000009140
GO:0090206	negative regulation of cholesterol metabolic process	BP	1	3	0.054608	0.382054	ENSSSCG00000021355
GO:0090427	activation of meiosis	BP	1	3	0.054608	0.382054	ENSSSCG00000016533
GO:0098722	asymmetric stem cell division	BP	1	3	0.054608	0.382054	ENSSSCG00000016533
GO:0098728	germline stem cell asymmetric division	BP	1	3	0.054608	0.382054	ENSSSCG00000016533
GO:0098903	regulation of membrane repolarization during action potential	BP	1	3	0.054608	0.382054	ENSSSCG00000029323
GO:0099185	postsynaptic intermediate filament cytoskeleton organization	BP	1	3	0.054608	0.382054	ENSSSCG00000009649
GO:0106119	negative regulation of sterol biosynthetic process	BP	1	3	0.054608	0.382054	ENSSSCG00000021355
GO:0110135	Norrin signaling pathway	BP	1	3	0.054608	0.382054	ENSSSCG00000012885
GO:1900186	negative regulation of clathrin-dependent endocytosis	BP	1	3	0.054608	0.382054	ENSSSCG00000021638
GO:1901162	primary amino compound biosynthetic process	BP	1	3	0.054608	0.382054	ENSSSCG00000022009
GO:1901314	regulation of histone H2A K63-linked ubiquitination	BP	1	3	0.054608	0.382054	ENSSSCG00000002469
GO:1901315	negative regulation of histone H2A K63-linked ubiquitination	BP	1	3	0.054608	0.382054	ENSSSCG00000002469
GO:1902445	regulation of mitochondrial membrane permeability involved in programmed necrotic cell death	BP	1	3	0.054608	0.382054	ENSSSCG00000010330
GO:1902767	isoprenoid biosynthetic process via mevalonate	BP	1	3	0.054608	0.382054	ENSSSCG00000036808
GO:1903765	negative regulation of potassium ion export across plasma membrane	BP	1	3	0.054608	0.382054	ENSSSCG00000029323
GO:1904271	L-proline import across plasma membrane	BP	1	3	0.054608	0.382054	ENSSSCG00000035893
GO:1904555	L-proline transmembrane transport	BP	1	3	0.054608	0.382054	ENSSSCG00000035893
GO:1905584	outer hair cell apoptotic process	BP	1	3	0.054608	0.382054	ENSSSCG00000009524
GO:1905647	proline import across plasma membrane	BP	1	3	0.054608	0.382054	ENSSSCG00000035893
GO:1905706	regulation of mitochondrial ATP synthesis coupled proton transport	BP	1	3	0.054608	0.382054	ENSSSCG00000036387
GO:2000275	regulation of oxidative phosphorylation uncoupler activity	BP	1	3	0.054608	0.382054	ENSSSCG00000010330
GO:2000412	positive regulation of thymocyte migration	BP	1	3	0.054608	0.382054	ENSSSCG00000010772
GO:2000416	regulation of eosinophil migration	BP	1	3	0.054608	0.382054	ENSSSCG00000010772
GO:2000449	regulation of CD8-positive, alpha-beta T cell extravasation	BP	1	3	0.054608	0.382054	ENSSSCG00000001987
GO:2000503	positive regulation of natural killer cell chemotaxis	BP	1	3	0.054608	0.382054	ENSSSCG00000014310
GO:2000768	positive regulation of nephron tubule epithelial cell differentiation	BP	1	3	0.054608	0.382054	ENSSSCG00000008745
GO:2001206	positive regulation of osteoclast development	BP	1	3	0.054608	0.382054	ENSSSCG00000034114
GO:0006576	cellular biogenic amine metabolic process	BP	4	77	0.0547892	0.382615	ENSSSCG00000012589;ENSSSCG00000022009;ENSSSCG00000033636;ENSSSCG00000038660
GO:0019953	sexual reproduction	BP	17	599	0.0549253	0.382859	ENSSSCG00000000139;ENSSSCG00000002144;ENSSSCG00000004701;ENSSSCG00000007382;ENSSSCG00000011727;ENSSSCG00000014214;ENSSSCG00000016489;ENSSSCG00000016522;ENSSSCG00000016533;ENSSSCG00000016579;ENSSSCG00000016601;ENSSSCG00000017565;ENSSSCG00000021355;ENSSSCG00000026360;ENSSSCG00000029990;ENSSSCG00000039769;ENSSSCG00000040416
GO:0004601	peroxidase activity	MF	2	42	0.181085	0.391418	ENSSSCG00000031736;ENSSSCG00000036438
GO:0004090	carbonyl reductase (NADPH) activity	MF	1	11	0.185124	0.391418	ENSSSCG00000020706
GO:0005221	intracellular cyclic nucleotide activated cation channel activity	MF	1	11	0.185124	0.391418	ENSSSCG00000033190
GO:0015250	water channel activity	MF	1	11	0.185124	0.391418	ENSSSCG00000033190
GO:0015279	store-operated calcium channel activity	MF	1	11	0.185124	0.391418	ENSSSCG00000023912
GO:0015368	calcium:cation antiporter activity	MF	1	11	0.185124	0.391418	ENSSSCG00000002450
GO:0030548	acetylcholine receptor regulator activity	MF	1	11	0.185124	0.391418	ENSSSCG00000012490
GO:0031543	peptidyl-proline dioxygenase activity	MF	1	11	0.185124	0.391418	ENSSSCG00000025953
GO:0035325	Toll-like receptor binding	MF	1	11	0.185124	0.391418	ENSSSCG00000026592
GO:0035381	ATP-gated ion channel activity	MF	1	11	0.185124	0.391418	ENSSSCG00000038275
GO:0043855	cyclic nucleotide-gated ion channel activity	MF	1	11	0.185124	0.391418	ENSSSCG00000033190
GO:0099602	neurotransmitter receptor regulator activity	MF	1	11	0.185124	0.391418	ENSSSCG00000012490
GO:0098771	inorganic ion homeostasis	BP	16	557	0.0562641	0.39147	ENSSSCG00000000135;ENSSSCG00000000385;ENSSSCG00000002450;ENSSSCG00000009524;ENSSSCG00000012386;ENSSSCG00000012437;ENSSSCG00000015136;ENSSSCG00000015543;ENSSSCG00000021355;ENSSSCG00000023918;ENSSSCG00000024674;ENSSSCG00000027928;ENSSSCG00000029304;ENSSSCG00000029323;ENSSSCG00000031423;ENSSSCG00000038057
GO:0070997	neuron death	BP	8	223	0.0566187	0.392977	ENSSSCG00000000884;ENSSSCG00000009524;ENSSSCG00000009540;ENSSSCG00000009649;ENSSSCG00000010772;ENSSSCG00000012409;ENSSSCG00000016792;ENSSSCG00000021355
GO:0009110	vitamin biosynthetic process	BP	2	21	0.0571037	0.392977	ENSSSCG00000015462;ENSSSCG00000034758
GO:0009310	amine catabolic process	BP	2	21	0.0571037	0.392977	ENSSSCG00000033636;ENSSSCG00000038660
GO:0034505	tooth mineralization	BP	2	21	0.0571037	0.392977	ENSSSCG00000008072;ENSSSCG00000009220
GO:0060544	regulation of necroptotic process	BP	2	21	0.0571037	0.392977	ENSSSCG00000001987;ENSSSCG00000009140
GO:0097205	renal filtration	BP	2	21	0.0571037	0.392977	ENSSSCG00000007456;ENSSSCG00000033190
GO:0016859	cis-trans isomerase activity	MF	2	43	0.187746	0.39591	ENSSSCG00000010330;ENSSSCG00000031128
GO:0030833	regulation of actin filament polymerization	BP	6	148	0.0577998	0.397046	ENSSSCG00000005235;ENSSSCG00000011246;ENSSSCG00000012517;ENSSSCG00000026108;ENSSSCG00000028695;ENSSSCG00000039769
GO:0048018	receptor ligand activity	MF	10	393	0.191028	0.401765	ENSSSCG00000005152;ENSSSCG00000005203;ENSSSCG00000005216;ENSSSCG00000007079;ENSSSCG00000013408;ENSSSCG00000014310;ENSSSCG00000016522;ENSSSCG00000031075;ENSSSCG00000036520;ENSSSCG00000036893
GO:0050790	regulation of catalytic activity	BP	43	1824	0.0591344	0.402472	ENSSSCG00000000884;ENSSSCG00000001987;ENSSSCG00000001989;ENSSSCG00000002479;ENSSSCG00000004065;ENSSSCG00000007384;ENSSSCG00000008118;ENSSSCG00000010330;ENSSSCG00000010334;ENSSSCG00000010772;ENSSSCG00000010840;ENSSSCG00000011363;ENSSSCG00000011727;ENSSSCG00000012437;ENSSSCG00000012885;ENSSSCG00000012960;ENSSSCG00000013241;ENSSSCG00000014080;ENSSSCG00000014411;ENSSSCG00000015136;ENSSSCG00000016489;…
GO:0014020	primary neural tube formation	BP	4	79	0.0591455	0.402472	ENSSSCG00000000884;ENSSSCG00000006051;ENSSSCG00000013408;ENSSSCG00000029838
GO:0071322	cellular response to carbohydrate stimulus	BP	4	79	0.0591455	0.402472	ENSSSCG00000012885;ENSSSCG00000034114;ENSSSCG00000035893;ENSSSCG00000036520
GO:0065009	regulation of molecular function	BP	54	2364	0.0592551	0.402472	ENSSSCG00000000046;ENSSSCG00000000884;ENSSSCG00000001987;ENSSSCG00000001989;ENSSSCG00000002450;ENSSSCG00000002479;ENSSSCG00000004065;ENSSSCG00000006051;ENSSSCG00000007384;ENSSSCG00000007572;ENSSSCG00000008118;ENSSSCG00000010330;ENSSSCG00000010334;ENSSSCG00000010772;ENSSSCG00000010840;ENSSSCG00000011363;ENSSSCG00000011727;ENSSSCG00000011850;ENSSSCG00000012336;ENSSSCG00000012437;ENSSSCG00000012885;…
GO:0046470	phosphatidylcholine metabolic process	BP	3	48	0.0592797	0.402472	ENSSSCG00000013241;ENSSSCG00000028010;ENSSSCG00000040569
GO:0070265	necrotic cell death	BP	3	48	0.0592797	0.402472	ENSSSCG00000001987;ENSSSCG00000009140;ENSSSCG00000010330
GO:0009410	response to xenobiotic stimulus	BP	6	149	0.0593341	0.402472	ENSSSCG00000000046;ENSSSCG00000001073;ENSSSCG00000015268;ENSSSCG00000021355;ENSSSCG00000034213;ENSSSCG00000042162
GO:0090066	regulation of anatomical structure size	BP	12	389	0.0596108	0.403626	ENSSSCG00000005235;ENSSSCG00000009649;ENSSSCG00000011246;ENSSSCG00000012517;ENSSSCG00000013408;ENSSSCG00000014411;ENSSSCG00000021355;ENSSSCG00000026108;ENSSSCG00000028695;ENSSSCG00000033190;ENSSSCG00000036520;ENSSSCG00000039769
GO:0004812	aminoacyl-tRNA ligase activity	MF	2	44	0.19444	0.403865	ENSSSCG00000014411;ENSSSCG00000032016
GO:0015036	disulfide oxidoreductase activity	MF	2	44	0.19444	0.403865	ENSSSCG00000010610;ENSSSCG00000023929
GO:0016875	ligase activity, forming carbon-oxygen bonds	MF	2	44	0.19444	0.403865	ENSSSCG00000014411;ENSSSCG00000032016
GO:0016810	hydrolase activity, acting on carbon-nitrogen (but not peptide) bonds	MF	4	124	0.19584	0.403865	ENSSSCG00000013065;ENSSSCG00000029761;ENSSSCG00000033636;ENSSSCG00000034213
GO:0051213	dioxygenase activity	MF	3	83	0.197275	0.403865	ENSSSCG00000025953;ENSSSCG00000038660;ENSSSCG00000039244
GO:0005313	L-glutamate transmembrane transporter activity	MF	1	12	0.200154	0.403865	ENSSSCG00000015949
GO:0005402	carbohydrate:cation symporter activity	MF	1	12	0.200154	0.403865	ENSSSCG00000024058
GO:0008331	high voltage-gated calcium channel activity	MF	1	12	0.200154	0.403865	ENSSSCG00000015543
GO:0008417	fucosyltransferase activity	MF	1	12	0.200154	0.403865	ENSSSCG00000040556
GO:0016722	oxidoreductase activity, acting on metal ions	MF	1	12	0.200154	0.403865	ENSSSCG00000029304
GO:0016805	dipeptidase activity	MF	1	12	0.200154	0.403865	ENSSSCG00000004869
GO:0034236	protein kinase A catalytic subunit binding	MF	1	12	0.200154	0.403865	ENSSSCG00000011363
GO:0047372	acylglycerol lipase activity	MF	1	12	0.200154	0.403865	ENSSSCG00000028010
GO:0051428	peptide hormone receptor binding	MF	1	12	0.200154	0.403865	ENSSSCG00000036893
GO:0097200	cysteine-type endopeptidase activity involved in execution phase of apoptosis	MF	1	12	0.200154	0.403865	ENSSSCG00000009140
GO:0106019	phosphatidylinositol-4,5-bisphosphate phosphatase activity	MF	1	12	0.200154	0.403865	ENSSSCG00000012315
GO:0051219	phosphoprotein binding	MF	3	84	0.202004	0.405934	ENSSSCG00000015136;ENSSSCG00000024674;ENSSSCG00000040416
GO:0004252	serine-type endopeptidase activity	MF	5	169	0.202201	0.405934	ENSSSCG00000007760;ENSSSCG00000024914;ENSSSCG00000029879;ENSSSCG00000034792;ENSSSCG00000035337
GO:0030546	signaling receptor activator activity	MF	10	400	0.205337	0.411191	ENSSSCG00000005152;ENSSSCG00000005203;ENSSSCG00000005216;ENSSSCG00000007079;ENSSSCG00000013408;ENSSSCG00000014310;ENSSSCG00000016522;ENSSSCG00000031075;ENSSSCG00000036520;ENSSSCG00000036893
GO:0001649	osteoblast differentiation	BP	6	150	0.0608925	0.41129	ENSSSCG00000006051;ENSSSCG00000012409;ENSSSCG00000012885;ENSSSCG00000017254;ENSSSCG00000029879;ENSSSCG00000036893
GO:0006897	endocytosis	BP	13	433	0.0609601	0.41129	ENSSSCG00000000978;ENSSSCG00000002921;ENSSSCG00000008118;ENSSSCG00000011727;ENSSSCG00000012315;ENSSSCG00000012392;ENSSSCG00000012885;ENSSSCG00000013241;ENSSSCG00000013248;ENSSSCG00000013408;ENSSSCG00000021638;ENSSSCG00000024088;ENSSSCG00000027226
GO:0098657	import into cell	BP	7	188	0.0613816	0.413056	ENSSSCG00000000385;ENSSSCG00000002450;ENSSSCG00000012386;ENSSSCG00000015543;ENSSSCG00000023918;ENSSSCG00000024058;ENSSSCG00000035893
GO:0019362	pyridine nucleotide metabolic process	BP	2	22	0.062065	0.413056	ENSSSCG00000033636;ENSSSCG00000038660
GO:0032469	endoplasmic reticulum calcium ion homeostasis	BP	2	22	0.062065	0.413056	ENSSSCG00000000135;ENSSSCG00000009524
GO:0035461	vitamin transmembrane transport	BP	2	22	0.062065	0.413056	ENSSSCG00000017208;ENSSSCG00000027118
GO:0046496	nicotinamide nucleotide metabolic process	BP	2	22	0.062065	0.413056	ENSSSCG00000033636;ENSSSCG00000038660
GO:0099560	synaptic membrane adhesion	BP	2	22	0.062065	0.413056	ENSSSCG00000007079;ENSSSCG00000036520
GO:0006811	ion transport	BP	32	1302	0.0622846	0.413056	ENSSSCG00000000385;ENSSSCG00000002450;ENSSSCG00000004701;ENSSSCG00000006932;ENSSSCG00000010330;ENSSSCG00000010960;ENSSSCG00000011641;ENSSSCG00000012386;ENSSSCG00000012437;ENSSSCG00000015083;ENSSSCG00000015136;ENSSSCG00000015543;ENSSSCG00000015949;ENSSSCG00000016682;ENSSSCG00000017208;ENSSSCG00000017925;ENSSSCG00000017926;ENSSSCG00000023912;ENSSSCG00000023918;ENSSSCG00000024018;ENSSSCG00000024058;…
GO:0006805	xenobiotic metabolic process	BP	3	49	0.0623131	0.413056	ENSSSCG00000000046;ENSSSCG00000001073;ENSSSCG00000015268
GO:0019233	sensory perception of pain	BP	3	49	0.0623131	0.413056	ENSSSCG00000016792;ENSSSCG00000033190;ENSSSCG00000036387
GO:0032835	glomerulus development	BP	3	49	0.0623131	0.413056	ENSSSCG00000007456;ENSSSCG00000008745;ENSSSCG00000033190
GO:0016614	oxidoreductase activity, acting on CH-OH group of donors	MF	4	127	0.207231	0.413229	ENSSSCG00000014080;ENSSSCG00000015930;ENSSSCG00000020706;ENSSSCG00000032557
GO:0016684	oxidoreductase activity, acting on peroxide as acceptor	MF	2	46	0.207914	0.413229	ENSSSCG00000031736;ENSSSCG00000036438
GO:0043539	protein serine/threonine kinase activator activity	MF	2	46	0.207914	0.413229	ENSSSCG00000017254;ENSSSCG00000029879
GO:0010817	regulation of hormone levels	BP	11	350	0.0624881	0.413492	ENSSSCG00000000046;ENSSSCG00000009225;ENSSSCG00000012885;ENSSSCG00000015930;ENSSSCG00000025578;ENSSSCG00000033190;ENSSSCG00000034114;ENSSSCG00000035893;ENSSSCG00000036520;ENSSSCG00000040416;ENSSSCG00000042162
GO:0009617	response to bacterium	BP	13	435	0.0627361	0.413997	ENSSSCG00000003801;ENSSSCG00000006141;ENSSSCG00000007384;ENSSSCG00000010334;ENSSSCG00000012409;ENSSSCG00000013241;ENSSSCG00000015540;ENSSSCG00000026592;ENSSSCG00000029879;ENSSSCG00000029990;ENSSSCG00000033190;ENSSSCG00000034792;ENSSSCG00000040998
GO:0044242	cellular lipid catabolic process	BP	7	189	0.0627832	0.413997	ENSSSCG00000004233;ENSSSCG00000021638;ENSSSCG00000028010;ENSSSCG00000031736;ENSSSCG00000034213;ENSSSCG00000039244;ENSSSCG00000040569
GO:0004620	phospholipase activity	MF	3	86	0.21154	0.419387	ENSSSCG00000004233;ENSSSCG00000028010;ENSSSCG00000040569
GO:0030072	peptide hormone secretion	BP	6	152	0.0640817	0.419665	ENSSSCG00000012885;ENSSSCG00000033190;ENSSSCG00000034114;ENSSSCG00000035893;ENSSSCG00000036520;ENSSSCG00000042162
GO:0008154	actin polymerization or depolymerization	BP	7	190	0.0642043	0.419665	ENSSSCG00000005235;ENSSSCG00000011246;ENSSSCG00000012517;ENSSSCG00000015632;ENSSSCG00000026108;ENSSSCG00000028695;ENSSSCG00000039769
GO:0034220	ion transmembrane transport	BP	25	978	0.0651299	0.419665	ENSSSCG00000000385;ENSSSCG00000002450;ENSSSCG00000004701;ENSSSCG00000006932;ENSSSCG00000010330;ENSSSCG00000010960;ENSSSCG00000012386;ENSSSCG00000012437;ENSSSCG00000015136;ENSSSCG00000015543;ENSSSCG00000015949;ENSSSCG00000017208;ENSSSCG00000023912;ENSSSCG00000023918;ENSSSCG00000024018;ENSSSCG00000024058;ENSSSCG00000027118;ENSSSCG00000029323;ENSSSCG00000031267;ENSSSCG00000033190;ENSSSCG00000035893;…
GO:0016042	lipid catabolic process	BP	9	270	0.0651548	0.419665	ENSSSCG00000004233;ENSSSCG00000008640;ENSSSCG00000009225;ENSSSCG00000021638;ENSSSCG00000028010;ENSSSCG00000031736;ENSSSCG00000034213;ENSSSCG00000039244;ENSSSCG00000040569
GO:0006952	defense response	BP	28	1119	0.0655408	0.419665	ENSSSCG00000001987;ENSSSCG00000003801;ENSSSCG00000005152;ENSSSCG00000005203;ENSSSCG00000007384;ENSSSCG00000009140;ENSSSCG00000010334;ENSSSCG00000010772;ENSSSCG00000011727;ENSSSCG00000012409;ENSSSCG00000013241;ENSSSCG00000015540;ENSSSCG00000016522;ENSSSCG00000021355;ENSSSCG00000021728;ENSSSCG00000024914;ENSSSCG00000026592;ENSSSCG00000028359;ENSSSCG00000029879;ENSSSCG00000029990;ENSSSCG00000031075;…
GO:0032271	regulation of protein polymerization	BP	7	191	0.0656448	0.419665	ENSSSCG00000002921;ENSSSCG00000005235;ENSSSCG00000011246;ENSSSCG00000012517;ENSSSCG00000026108;ENSSSCG00000028695;ENSSSCG00000039769
GO:0065008	regulation of biological quality	BP	65	2932	0.06624	0.419665	ENSSSCG00000000046;ENSSSCG00000000135;ENSSSCG00000000385;ENSSSCG00000000920;ENSSSCG00000001987;ENSSSCG00000002450;ENSSSCG00000002906;ENSSSCG00000005235;ENSSSCG00000005284;ENSSSCG00000007079;ENSSSCG00000007492;ENSSSCG00000008002;ENSSSCG00000008745;ENSSSCG00000009225;ENSSSCG00000009524;ENSSSCG00000009649;ENSSSCG00000010188;ENSSSCG00000010330;ENSSSCG00000010334;ENSSSCG00000010772;ENSSSCG00000011246;…
GO:0009952	anterior/posterior pattern specification	BP	7	192	0.0671047	0.419665	ENSSSCG00000007572;ENSSSCG00000008081;ENSSSCG00000012885;ENSSSCG00000025578;ENSSSCG00000034474;ENSSSCG00000035420;ENSSSCG00000038993
GO:0044058	regulation of digestive system process	BP	2	23	0.0671667	0.419665	ENSSSCG00000013241;ENSSSCG00000033190
GO:0120033	negative regulation of plasma membrane bounded cell projection assembly	BP	2	23	0.0671667	0.419665	ENSSSCG00000005235;ENSSSCG00000023788
GO:0015749	monosaccharide transmembrane transport	BP	4	83	0.0683935	0.419665	ENSSSCG00000002921;ENSSSCG00000023915;ENSSSCG00000024058;ENSSSCG00000027118
GO:0001890	placenta development	BP	5	118	0.068729	0.419665	ENSSSCG00000002906;ENSSSCG00000009860;ENSSSCG00000012409;ENSSSCG00000013408;ENSSSCG00000016522
GO:0007338	single fertilization	BP	5	118	0.068729	0.419665	ENSSSCG00000014214;ENSSSCG00000016489;ENSSSCG00000016579;ENSSSCG00000016601;ENSSSCG00000026360
GO:0050708	regulation of protein secretion	BP	6	155	0.0690466	0.419665	ENSSSCG00000012885;ENSSSCG00000013241;ENSSSCG00000014080;ENSSSCG00000034114;ENSSSCG00000036520;ENSSSCG00000042162
GO:0032970	regulation of actin filament-based process	BP	10	315	0.0697097	0.419665	ENSSSCG00000005235;ENSSSCG00000006957;ENSSSCG00000011246;ENSSSCG00000012392;ENSSSCG00000012517;ENSSSCG00000026108;ENSSSCG00000028359;ENSSSCG00000028695;ENSSSCG00000036520;ENSSSCG00000039769
GO:0002790	peptide secretion	BP	6	156	0.0707498	0.419665	ENSSSCG00000012885;ENSSSCG00000033190;ENSSSCG00000034114;ENSSSCG00000035893;ENSSSCG00000036520;ENSSSCG00000042162
GO:0034219	carbohydrate transmembrane transport	BP	4	84	0.0708157	0.419665	ENSSSCG00000002921;ENSSSCG00000023915;ENSSSCG00000024058;ENSSSCG00000027118
GO:0044092	negative regulation of molecular function	BP	22	849	0.071642	0.419665	ENSSSCG00000000046;ENSSSCG00000002479;ENSSSCG00000007384;ENSSSCG00000010330;ENSSSCG00000010334;ENSSSCG00000011363;ENSSSCG00000011727;ENSSSCG00000012336;ENSSSCG00000012885;ENSSSCG00000012960;ENSSSCG00000014080;ENSSSCG00000015136;ENSSSCG00000016489;ENSSSCG00000028871;ENSSSCG00000029323;ENSSSCG00000029879;ENSSSCG00000032423;ENSSSCG00000033190;ENSSSCG00000033586;ENSSSCG00000040470;ENSSSCG00000040569;…
GO:0046530	photoreceptor cell differentiation	BP	3	52	0.0718337	0.419665	ENSSSCG00000008745;ENSSSCG00000029843;ENSSSCG00000040416
GO:0001878	response to yeast	BP	1	4	0.0721418	0.419665	ENSSSCG00000011727
GO:0002803	positive regulation of antibacterial peptide production	BP	1	4	0.0721418	0.419665	ENSSSCG00000034792
GO:0002842	positive regulation of T cell mediated immune response to tumor cell	BP	1	4	0.0721418	0.419665	ENSSSCG00000015540
GO:0006172	ADP biosynthetic process	BP	1	4	0.0721418	0.419665	ENSSSCG00000005627
GO:0006478	peptidyl-tyrosine sulfation	BP	1	4	0.0721418	0.419665	ENSSSCG00000009963
GO:0006863	purine nucleobase transport	BP	1	4	0.0721418	0.419665	ENSSSCG00000010960
GO:0007386	compartment pattern specification	BP	1	4	0.0721418	0.419665	ENSSSCG00000007572
GO:0008594	photoreceptor cell morphogenesis	BP	1	4	0.0721418	0.419665	ENSSSCG00000040416
GO:0009136	purine nucleoside diphosphate biosynthetic process	BP	1	4	0.0721418	0.419665	ENSSSCG00000005627
GO:0009175	pyrimidine ribonucleoside monophosphate catabolic process	BP	1	4	0.0721418	0.419665	ENSSSCG00000028210
GO:0009180	purine ribonucleoside diphosphate biosynthetic process	BP	1	4	0.0721418	0.419665	ENSSSCG00000005627
GO:0009992	cellular water homeostasis	BP	1	4	0.0721418	0.419665	ENSSSCG00000033190
GO:0015851	nucleobase transport	BP	1	4	0.0721418	0.419665	ENSSSCG00000010960
GO:0015860	purine nucleoside transmembrane transport	BP	1	4	0.0721418	0.419665	ENSSSCG00000010960
GO:0015882	L-ascorbic acid transmembrane transport	BP	1	4	0.0721418	0.419665	ENSSSCG00000027118
GO:0019805	quinolinate biosynthetic process	BP	1	4	0.0721418	0.419665	ENSSSCG00000038660
GO:0021553	olfactory nerve development	BP	1	4	0.0721418	0.419665	ENSSSCG00000002450
GO:0030046	parallel actin filament bundle assembly	BP	1	4	0.0721418	0.419665	ENSSSCG00000039769
GO:0031133	regulation of axon diameter	BP	1	4	0.0721418	0.419665	ENSSSCG00000009649
GO:0036369	transcription factor catabolic process	BP	1	4	0.0721418	0.419665	ENSSSCG00000009860
GO:0042494	detection of bacterial lipoprotein	BP	1	4	0.0721418	0.419665	ENSSSCG00000026592
GO:0042756	drinking behavior	BP	1	4	0.0721418	0.419665	ENSSSCG00000002450
GO:0044572	[4Fe-4S] cluster assembly	BP	1	4	0.0721418	0.419665	ENSSSCG00000031269
GO:0045337	farnesyl diphosphate biosynthetic process	BP	1	4	0.0721418	0.419665	ENSSSCG00000036808
GO:0046050	UMP catabolic process	BP	1	4	0.0721418	0.419665	ENSSSCG00000028210
GO:0046469	platelet activating factor metabolic process	BP	1	4	0.0721418	0.419665	ENSSSCG00000040569
GO:0046836	glycolipid transport	BP	1	4	0.0721418	0.419665	ENSSSCG00000016682
GO:0051103	DNA ligation involved in DNA repair	BP	1	4	0.0721418	0.419665	ENSSSCG00000009540
GO:0060049	regulation of protein glycosylation	BP	1	4	0.0721418	0.419665	ENSSSCG00000034213
GO:0060318	definitive erythrocyte differentiation	BP	1	4	0.0721418	0.419665	ENSSSCG00000040875
GO:0060631	regulation of meiosis I	BP	1	4	0.0721418	0.419665	ENSSSCG00000016489
GO:0070339	response to bacterial lipopeptide	BP	1	4	0.0721418	0.419665	ENSSSCG00000026592
GO:0070535	histone H2A K63-linked ubiquitination	BP	1	4	0.0721418	0.419665	ENSSSCG00000002469
GO:0071220	cellular response to bacterial lipoprotein	BP	1	4	0.0721418	0.419665	ENSSSCG00000026592
GO:0071221	cellular response to bacterial lipopeptide	BP	1	4	0.0721418	0.419665	ENSSSCG00000026592
GO:0071307	cellular response to vitamin K	BP	1	4	0.0721418	0.419665	ENSSSCG00000005859
GO:0071484	cellular response to light intensity	BP	1	4	0.0721418	0.419665	ENSSSCG00000002450
GO:0071934	thiamine transmembrane transport	BP	1	4	0.0721418	0.419665	ENSSSCG00000017208
GO:0090188	negative regulation of pancreatic juice secretion	BP	1	4	0.0721418	0.419665	ENSSSCG00000013241
GO:0097089	methyl-branched fatty acid metabolic process	BP	1	4	0.0721418	0.419665	ENSSSCG00000039244
GO:0097647	amylin receptor signaling pathway	BP	1	4	0.0721418	0.419665	ENSSSCG00000013408
GO:0098708	glucose import across plasma membrane	BP	1	4	0.0721418	0.419665	ENSSSCG00000024058
GO:0098967	exocytic insertion of neurotransmitter receptor to postsynaptic membrane	BP	1	4	0.0721418	0.419665	ENSSSCG00000021238
GO:1901483	regulation of transcription factor catabolic process	BP	1	4	0.0721418	0.419665	ENSSSCG00000009860
GO:1901485	positive regulation of transcription factor catabolic process	BP	1	4	0.0721418	0.419665	ENSSSCG00000009860
GO:1902170	cellular response to reactive nitrogen species	BP	1	4	0.0721418	0.419665	ENSSSCG00000033190
GO:1902202	regulation of hepatocyte growth factor receptor signaling pathway	BP	1	4	0.0721418	0.419665	ENSSSCG00000016900
GO:1902262	apoptotic process involved in blood vessel morphogenesis	BP	1	4	0.0721418	0.419665	ENSSSCG00000012885
GO:1902389	ceramide 1-phosphate transport	BP	1	4	0.0721418	0.419665	ENSSSCG00000016682
GO:1902744	negative regulation of lamellipodium organization	BP	1	4	0.0721418	0.419665	ENSSSCG00000005235
GO:1904393	regulation of skeletal muscle acetylcholine-gated channel clustering	BP	1	4	0.0721418	0.419665	ENSSSCG00000013248
GO:1904823	purine nucleobase transmembrane transport	BP	1	4	0.0721418	0.419665	ENSSSCG00000010960
GO:1990410	adrenomedullin receptor signaling pathway	BP	1	4	0.0721418	0.419665	ENSSSCG00000013408
GO:2000410	regulation of thymocyte migration	BP	1	4	0.0721418	0.419665	ENSSSCG00000010772
GO:2001286	regulation of caveolin-mediated endocytosis	BP	1	4	0.0721418	0.419665	ENSSSCG00000008118
GO:0010942	positive regulation of cell death	BP	12	402	0.0723149	0.419665	ENSSSCG00000000884;ENSSSCG00000001987;ENSSSCG00000001989;ENSSSCG00000002921;ENSSSCG00000007243;ENSSSCG00000009140;ENSSSCG00000010772;ENSSSCG00000016793;ENSSSCG00000021355;ENSSSCG00000021728;ENSSSCG00000025578;ENSSSCG00000034213
GO:0034123	positive regulation of toll-like receptor signaling pathway	BP	2	24	0.0724019	0.419665	ENSSSCG00000013241;ENSSSCG00000029879
GO:0048009	insulin-like growth factor receptor signaling pathway	BP	2	24	0.0724019	0.419665	ENSSSCG00000004928;ENSSSCG00000023162
GO:0062098	regulation of programmed necrotic cell death	BP	2	24	0.0724019	0.419665	ENSSSCG00000001987;ENSSSCG00000009140
GO:0097242	amyloid-beta clearance	BP	2	24	0.0724019	0.419665	ENSSSCG00000013248;ENSSSCG00000014080
GO:0030073	insulin secretion	BP	5	120	0.0727249	0.420893	ENSSSCG00000012885;ENSSSCG00000034114;ENSSSCG00000035893;ENSSSCG00000036520;ENSSSCG00000042162
GO:0015355	secondary active monocarboxylate transmembrane transporter activity	MF	1	13	0.214909	0.421858	ENSSSCG00000024018
GO:0015385	sodium:proton antiporter activity	MF	1	13	0.214909	0.421858	ENSSSCG00000023918
GO:0031420	alkali metal ion binding	MF	1	13	0.214909	0.421858	ENSSSCG00000034758
GO:0086008	voltage-gated potassium channel activity involved in cardiac muscle cell action potential repolarization	MF	1	13	0.214909	0.421858	ENSSSCG00000029323
GO:0071695	anatomical structure maturation	BP	7	196	0.0731391	0.422216	ENSSSCG00000002450;ENSSSCG00000004701;ENSSSCG00000007382;ENSSSCG00000016489;ENSSSCG00000023162;ENSSSCG00000025578;ENSSSCG00000029990
GO:0071466	cellular response to xenobiotic stimulus	BP	4	85	0.0732813	0.422216	ENSSSCG00000000046;ENSSSCG00000001073;ENSSSCG00000015268;ENSSSCG00000034213
GO:0016192	vesicle-mediated transport	BP	30	1229	0.0745169	0.422216	ENSSSCG00000000139;ENSSSCG00000000978;ENSSSCG00000000985;ENSSSCG00000002701;ENSSSCG00000002921;ENSSSCG00000006003;ENSSSCG00000006762;ENSSSCG00000008118;ENSSSCG00000011727;ENSSSCG00000012063;ENSSSCG00000012315;ENSSSCG00000012392;ENSSSCG00000012885;ENSSSCG00000012978;ENSSSCG00000013241;ENSSSCG00000013248;ENSSSCG00000013408;ENSSSCG00000021238;ENSSSCG00000021355;ENSSSCG00000021638;ENSSSCG00000024088;…
GO:0001523	retinoid metabolic process	BP	3	53	0.0751439	0.422216	ENSSSCG00000000046;ENSSSCG00000015930;ENSSSCG00000025578
GO:0045669	positive regulation of osteoblast differentiation	BP	3	53	0.0751439	0.422216	ENSSSCG00000006051;ENSSSCG00000012885;ENSSSCG00000029879
GO:2000401	regulation of lymphocyte migration	BP	3	53	0.0751439	0.422216	ENSSSCG00000001987;ENSSSCG00000010772;ENSSSCG00000014310
GO:2001244	positive regulation of intrinsic apoptotic signaling pathway	BP	3	53	0.0751439	0.422216	ENSSSCG00000001987;ENSSSCG00000007243;ENSSSCG00000021355
GO:0044106	cellular amine metabolic process	BP	4	86	0.0757902	0.422216	ENSSSCG00000012589;ENSSSCG00000022009;ENSSSCG00000033636;ENSSSCG00000038660
GO:0098655	cation transmembrane transport	BP	20	763	0.0760871	0.422216	ENSSSCG00000000385;ENSSSCG00000002450;ENSSSCG00000004701;ENSSSCG00000010330;ENSSSCG00000010960;ENSSSCG00000012386;ENSSSCG00000012437;ENSSSCG00000015136;ENSSSCG00000015543;ENSSSCG00000017208;ENSSSCG00000023912;ENSSSCG00000023918;ENSSSCG00000024058;ENSSSCG00000029323;ENSSSCG00000031267;ENSSSCG00000033190;ENSSSCG00000035893;ENSSSCG00000036387;ENSSSCG00000038264;ENSSSCG00000042162
GO:0002376	immune system process	BP	47	2058	0.0761184	0.422216	ENSSSCG00000001396;ENSSSCG00000001917;ENSSSCG00000001987;ENSSSCG00000002906;ENSSSCG00000003801;ENSSSCG00000005152;ENSSSCG00000005203;ENSSSCG00000005594;ENSSSCG00000006413;ENSSSCG00000007384;ENSSSCG00000007492;ENSSSCG00000007572;ENSSSCG00000008002;ENSSSCG00000008081;ENSSSCG00000009140;ENSSSCG00000009540;ENSSSCG00000010188;ENSSSCG00000010334;ENSSSCG00000010772;ENSSSCG00000011727;ENSSSCG00000012392;…
GO:0031589	cell-substrate adhesion	BP	9	279	0.0764461	0.422216	ENSSSCG00000005235;ENSSSCG00000009220;ENSSSCG00000011850;ENSSSCG00000012121;ENSSSCG00000020963;ENSSSCG00000028359;ENSSSCG00000032423;ENSSSCG00000034213;ENSSSCG00000036520
GO:0021700	developmental maturation	BP	8	239	0.0777516	0.422216	ENSSSCG00000002450;ENSSSCG00000004701;ENSSSCG00000007382;ENSSSCG00000009649;ENSSSCG00000016489;ENSSSCG00000023162;ENSSSCG00000025578;ENSSSCG00000029990
GO:0006760	folic acid-containing compound metabolic process	BP	2	25	0.0777639	0.422216	ENSSSCG00000036208;ENSSSCG00000037637
GO:0040020	regulation of meiotic nuclear division	BP	2	25	0.0777639	0.422216	ENSSSCG00000016489;ENSSSCG00000016533
GO:0042044	fluid transport	BP	2	25	0.0777639	0.422216	ENSSSCG00000031423;ENSSSCG00000033190
GO:0048240	sperm capacitation	BP	2	25	0.0777639	0.422216	ENSSSCG00000004701;ENSSSCG00000029990
GO:0010639	negative regulation of organelle organization	BP	9	280	0.0777704	0.422216	ENSSSCG00000002921;ENSSSCG00000005235;ENSSSCG00000006957;ENSSSCG00000010330;ENSSSCG00000011246;ENSSSCG00000012336;ENSSSCG00000012517;ENSSSCG00000023788;ENSSSCG00000028695
GO:0006469	negative regulation of protein kinase activity	BP	6	160	0.0778033	0.422216	ENSSSCG00000011363;ENSSSCG00000012885;ENSSSCG00000014080;ENSSSCG00000015136;ENSSSCG00000016489;ENSSSCG00000033586
GO:0006873	cellular ion homeostasis	BP	14	495	0.0782589	0.422216	ENSSSCG00000000135;ENSSSCG00000000385;ENSSSCG00000002450;ENSSSCG00000009524;ENSSSCG00000012386;ENSSSCG00000012437;ENSSSCG00000015136;ENSSSCG00000015543;ENSSSCG00000021355;ENSSSCG00000023918;ENSSSCG00000024674;ENSSSCG00000027928;ENSSSCG00000029323;ENSSSCG00000038057
GO:0001841	neural tube formation	BP	4	87	0.0783418	0.422216	ENSSSCG00000000884;ENSSSCG00000006051;ENSSSCG00000013408;ENSSSCG00000029838
GO:0006497	protein lipidation	BP	4	87	0.0783418	0.422216	ENSSSCG00000002921;ENSSSCG00000029291;ENSSSCG00000032481;ENSSSCG00000038329
GO:0032649	regulation of interferon-gamma production	BP	4	87	0.0783418	0.422216	ENSSSCG00000001917;ENSSSCG00000001987;ENSSSCG00000003801;ENSSSCG00000040875
GO:0090263	positive regulation of canonical Wnt signaling pathway	BP	4	87	0.0783418	0.422216	ENSSSCG00000005235;ENSSSCG00000007456;ENSSSCG00000023162;ENSSSCG00000027928
GO:0006081	cellular aldehyde metabolic process	BP	3	54	0.0785205	0.422216	ENSSSCG00000025578;ENSSSCG00000028501;ENSSSCG00000034758
GO:1901655	cellular response to ketone	BP	3	54	0.0785205	0.422216	ENSSSCG00000005859;ENSSSCG00000033190;ENSSSCG00000036520
GO:0016052	carbohydrate catabolic process	BP	5	123	0.0789522	0.422216	ENSSSCG00000011169;ENSSSCG00000012885;ENSSSCG00000021638;ENSSSCG00000022797;ENSSSCG00000034213
GO:0098876	vesicle-mediated transport to the plasma membrane	BP	5	123	0.0789522	0.422216	ENSSSCG00000000985;ENSSSCG00000012063;ENSSSCG00000021238;ENSSSCG00000028755;ENSSSCG00000040416
GO:0043087	regulation of GTPase activity	BP	9	281	0.0791087	0.422216	ENSSSCG00000004065;ENSSSCG00000008118;ENSSSCG00000010840;ENSSSCG00000014411;ENSSSCG00000017328;ENSSSCG00000021355;ENSSSCG00000023788;ENSSSCG00000036465;ENSSSCG00000036520
GO:0044283	small molecule biosynthetic process	BP	13	452	0.0792314	0.422216	ENSSSCG00000013241;ENSSSCG00000014080;ENSSSCG00000015462;ENSSSCG00000015930;ENSSSCG00000021355;ENSSSCG00000025578;ENSSSCG00000028010;ENSSSCG00000031736;ENSSSCG00000034213;ENSSSCG00000034758;ENSSSCG00000036208;ENSSSCG00000036808;ENSSSCG00000038660
GO:0006664	glycolipid metabolic process	BP	4	88	0.080936	0.422216	ENSSSCG00000021638;ENSSSCG00000029291;ENSSSCG00000032481;ENSSSCG00000038329
GO:0032609	interferon-gamma production	BP	4	88	0.080936	0.422216	ENSSSCG00000001917;ENSSSCG00000001987;ENSSSCG00000003801;ENSSSCG00000040875
GO:0010951	negative regulation of endopeptidase activity	BP	7	201	0.0811197	0.422216	ENSSSCG00000002479;ENSSSCG00000007384;ENSSSCG00000012960;ENSSSCG00000028871;ENSSSCG00000029879;ENSSSCG00000032423;ENSSSCG00000033190
GO:0008064	regulation of actin polymerization or depolymerization	BP	6	162	0.0814739	0.422216	ENSSSCG00000005235;ENSSSCG00000011246;ENSSSCG00000012517;ENSSSCG00000026108;ENSSSCG00000028695;ENSSSCG00000039769
GO:0016101	diterpenoid metabolic process	BP	3	55	0.0819623	0.422216	ENSSSCG00000000046;ENSSSCG00000015930;ENSSSCG00000025578
GO:0051348	negative regulation of transferase activity	BP	7	202	0.0827741	0.422216	ENSSSCG00000011363;ENSSSCG00000012885;ENSSSCG00000014080;ENSSSCG00000015136;ENSSSCG00000016489;ENSSSCG00000033586;ENSSSCG00000040470
GO:0051346	negative regulation of hydrolase activity	BP	9	284	0.0832074	0.422216	ENSSSCG00000002479;ENSSSCG00000007384;ENSSSCG00000010330;ENSSSCG00000011727;ENSSSCG00000012960;ENSSSCG00000028871;ENSSSCG00000029879;ENSSSCG00000032423;ENSSSCG00000033190
GO:0008045	motor neuron axon guidance	BP	2	26	0.0832462	0.422216	ENSSSCG00000003146;ENSSSCG00000012392
GO:0044793	negative regulation by host of viral process	BP	2	26	0.0832462	0.422216	ENSSSCG00000011727;ENSSSCG00000029879
GO:0051923	sulfation	BP	2	26	0.0832462	0.422216	ENSSSCG00000009963;ENSSSCG00000022153
GO:0048771	tissue remodeling	BP	5	125	0.0832578	0.422216	ENSSSCG00000006051;ENSSSCG00000010772;ENSSSCG00000012885;ENSSSCG00000015136;ENSSSCG00000016522
GO:0030832	regulation of actin filament length	BP	6	163	0.0833449	0.422216	ENSSSCG00000005235;ENSSSCG00000011246;ENSSSCG00000012517;ENSSSCG00000026108;ENSSSCG00000028695;ENSSSCG00000039769
GO:0071901	negative regulation of protein serine/threonine kinase activity	BP	4	89	0.0835723	0.422216	ENSSSCG00000011363;ENSSSCG00000012885;ENSSSCG00000014080;ENSSSCG00000016489
GO:1903509	liposaccharide metabolic process	BP	4	89	0.0835723	0.422216	ENSSSCG00000021638;ENSSSCG00000029291;ENSSSCG00000032481;ENSSSCG00000038329
GO:0051707	response to other organism	BP	24	959	0.0837655	0.422216	ENSSSCG00000001987;ENSSSCG00000003801;ENSSSCG00000005152;ENSSSCG00000006141;ENSSSCG00000007384;ENSSSCG00000009140;ENSSSCG00000010334;ENSSSCG00000010772;ENSSSCG00000011727;ENSSSCG00000012409;ENSSSCG00000013241;ENSSSCG00000014310;ENSSSCG00000015540;ENSSSCG00000024914;ENSSSCG00000026592;ENSSSCG00000029879;ENSSSCG00000029990;ENSSSCG00000031075;ENSSSCG00000033190;ENSSSCG00000034792;ENSSSCG00000035170;…
GO:0009887	animal organ morphogenesis	BP	21	820	0.0846491	0.422216	ENSSSCG00000002450;ENSSSCG00000003146;ENSSSCG00000006051;ENSSSCG00000007456;ENSSSCG00000008072;ENSSSCG00000008745;ENSSSCG00000009220;ENSSSCG00000012885;ENSSSCG00000013248;ENSSSCG00000016522;ENSSSCG00000017239;ENSSSCG00000021355;ENSSSCG00000025578;ENSSSCG00000029838;ENSSSCG00000029879;ENSSSCG00000033190;ENSSSCG00000034474;ENSSSCG00000034792;ENSSSCG00000038993;ENSSSCG00000040416;ENSSSCG00000040875
GO:0055080	cation homeostasis	BP	15	546	0.0847205	0.422216	ENSSSCG00000000135;ENSSSCG00000000385;ENSSSCG00000002450;ENSSSCG00000009524;ENSSSCG00000012386;ENSSSCG00000012437;ENSSSCG00000015136;ENSSSCG00000015543;ENSSSCG00000021355;ENSSSCG00000023918;ENSSSCG00000024674;ENSSSCG00000027928;ENSSSCG00000029304;ENSSSCG00000031423;ENSSSCG00000038057
GO:0140352	export from cell	BP	16	591	0.0847495	0.422216	ENSSSCG00000000985;ENSSSCG00000002450;ENSSSCG00000012885;ENSSSCG00000013241;ENSSSCG00000014080;ENSSSCG00000021238;ENSSSCG00000029304;ENSSSCG00000029323;ENSSSCG00000033190;ENSSSCG00000034114;ENSSSCG00000035893;ENSSSCG00000036520;ENSSSCG00000036871;ENSSSCG00000040569;ENSSSCG00000042162;ENSSSCG00000051585
GO:0043207	response to external biotic stimulus	BP	24	961	0.0852532	0.422216	ENSSSCG00000001987;ENSSSCG00000003801;ENSSSCG00000005152;ENSSSCG00000006141;ENSSSCG00000007384;ENSSSCG00000009140;ENSSSCG00000010334;ENSSSCG00000010772;ENSSSCG00000011727;ENSSSCG00000012409;ENSSSCG00000013241;ENSSSCG00000014310;ENSSSCG00000015540;ENSSSCG00000024914;ENSSSCG00000026592;ENSSSCG00000029879;ENSSSCG00000029990;ENSSSCG00000031075;ENSSSCG00000033190;ENSSSCG00000034792;ENSSSCG00000035170;…
GO:0010822	positive regulation of mitochondrion organization	BP	3	56	0.0854682	0.422216	ENSSSCG00000001989;ENSSSCG00000010330;ENSSSCG00000039769
GO:0070301	cellular response to hydrogen peroxide	BP	3	56	0.0854682	0.422216	ENSSSCG00000001987;ENSSSCG00000010330;ENSSSCG00000033190
GO:0050801	ion homeostasis	BP	16	592	0.0857071	0.422216	ENSSSCG00000000135;ENSSSCG00000000385;ENSSSCG00000002450;ENSSSCG00000009524;ENSSSCG00000012386;ENSSSCG00000012437;ENSSSCG00000015136;ENSSSCG00000015543;ENSSSCG00000021355;ENSSSCG00000023918;ENSSSCG00000024674;ENSSSCG00000027928;ENSSSCG00000029304;ENSSSCG00000029323;ENSSSCG00000031423;ENSSSCG00000038057
GO:0008202	steroid metabolic process	BP	7	204	0.0861408	0.422216	ENSSSCG00000000046;ENSSSCG00000009225;ENSSSCG00000012885;ENSSSCG00000014080;ENSSSCG00000015930;ENSSSCG00000021355;ENSSSCG00000036808
GO:0008203	cholesterol metabolic process	BP	4	90	0.0862503	0.422216	ENSSSCG00000012885;ENSSSCG00000014080;ENSSSCG00000021355;ENSSSCG00000036808
GO:0009308	amine metabolic process	BP	4	90	0.0862503	0.422216	ENSSSCG00000012589;ENSSSCG00000022009;ENSSSCG00000033636;ENSSSCG00000038660
GO:0034754	cellular hormone metabolic process	BP	4	90	0.0862503	0.422216	ENSSSCG00000000046;ENSSSCG00000009225;ENSSSCG00000015930;ENSSSCG00000025578
GO:0006820	anion transport	BP	12	415	0.0866515	0.422216	ENSSSCG00000006932;ENSSSCG00000011641;ENSSSCG00000015949;ENSSSCG00000016682;ENSSSCG00000017208;ENSSSCG00000017925;ENSSSCG00000017926;ENSSSCG00000024018;ENSSSCG00000027118;ENSSSCG00000035893;ENSSSCG00000038275;ENSSSCG00000040569
GO:0051129	negative regulation of cellular component organization	BP	14	504	0.0874725	0.422216	ENSSSCG00000002921;ENSSSCG00000005235;ENSSSCG00000006957;ENSSSCG00000008118;ENSSSCG00000010330;ENSSSCG00000011246;ENSSSCG00000012336;ENSSSCG00000012517;ENSSSCG00000013241;ENSSSCG00000013248;ENSSSCG00000021638;ENSSSCG00000023788;ENSSSCG00000028695;ENSSSCG00000032423
GO:0010466	negative regulation of peptidase activity	BP	7	205	0.0878531	0.422216	ENSSSCG00000002479;ENSSSCG00000007384;ENSSSCG00000012960;ENSSSCG00000028871;ENSSSCG00000029879;ENSSSCG00000032423;ENSSSCG00000033190
GO:0000413	protein peptidyl-prolyl isomerization	BP	2	27	0.0888426	0.422216	ENSSSCG00000010330;ENSSSCG00000031128
GO:0001913	T cell mediated cytotoxicity	BP	2	27	0.0888426	0.422216	ENSSSCG00000001987;ENSSSCG00000015540
GO:0032355	response to estradiol	BP	2	27	0.0888426	0.422216	ENSSSCG00000007492;ENSSSCG00000015828
GO:1903018	regulation of glycoprotein metabolic process	BP	2	27	0.0888426	0.422216	ENSSSCG00000011727;ENSSSCG00000034213
GO:0001678	cellular glucose homeostasis	BP	4	91	0.0889697	0.422216	ENSSSCG00000012885;ENSSSCG00000034114;ENSSSCG00000035893;ENSSSCG00000036520
GO:0008277	regulation of G protein-coupled receptor signaling pathway	BP	4	91	0.0889697	0.422216	ENSSSCG00000002450;ENSSSCG00000010840;ENSSSCG00000013408;ENSSSCG00000034792
GO:0045446	endothelial cell differentiation	BP	4	91	0.0889697	0.422216	ENSSSCG00000002906;ENSSSCG00000005380;ENSSSCG00000008081;ENSSSCG00000029838
GO:0002685	regulation of leukocyte migration	BP	6	166	0.0891002	0.422216	ENSSSCG00000001987;ENSSSCG00000010772;ENSSSCG00000012392;ENSSSCG00000014310;ENSSSCG00000016522;ENSSSCG00000028359
GO:0001550	ovarian cumulus expansion	BP	1	5	0.0893514	0.422216	ENSSSCG00000011727
GO:0001561	fatty acid alpha-oxidation	BP	1	5	0.0893514	0.422216	ENSSSCG00000039244
GO:0002568	somatic diversification of T cell receptor genes	BP	1	5	0.0893514	0.422216	ENSSSCG00000009540
GO:0002681	somatic recombination of T cell receptor gene segments	BP	1	5	0.0893514	0.422216	ENSSSCG00000009540
GO:0003149	membranous septum morphogenesis	BP	1	5	0.0893514	0.422216	ENSSSCG00000029838
GO:0003186	tricuspid valve morphogenesis	BP	1	5	0.0893514	0.422216	ENSSSCG00000040875
GO:0003190	atrioventricular valve formation	BP	1	5	0.0893514	0.422216	ENSSSCG00000040875
GO:0006249	dCMP catabolic process	BP	1	5	0.0893514	0.422216	ENSSSCG00000028210
GO:0006297	nucleotide-excision repair, DNA gap filling	BP	1	5	0.0893514	0.422216	ENSSSCG00000009540
GO:0006335	DNA replication-dependent nucleosome assembly	BP	1	5	0.0893514	0.422216	ENSSSCG00000012056
GO:0006432	phenylalanyl-tRNA aminoacylation	BP	1	5	0.0893514	0.422216	ENSSSCG00000032016
GO:0006565	L-serine catabolic process	BP	1	5	0.0893514	0.422216	ENSSSCG00000036208
GO:0006567	threonine catabolic process	BP	1	5	0.0893514	0.422216	ENSSSCG00000029945
GO:0006848	pyruvate transport	BP	1	5	0.0893514	0.422216	ENSSSCG00000024018
GO:0006924	activation-induced cell death of T cells	BP	1	5	0.0893514	0.422216	ENSSSCG00000001987
GO:0008078	mesodermal cell migration	BP	1	5	0.0893514	0.422216	ENSSSCG00000012885
GO:0014831	gastro-intestinal system smooth muscle contraction	BP	1	5	0.0893514	0.422216	ENSSSCG00000007456
GO:0015670	carbon dioxide transport	BP	1	5	0.0893514	0.422216	ENSSSCG00000033190
GO:0015862	uridine transport	BP	1	5	0.0893514	0.422216	ENSSSCG00000010960
GO:0015864	pyrimidine nucleoside transport	BP	1	5	0.0893514	0.422216	ENSSSCG00000010960
GO:0015888	thiamine transport	BP	1	5	0.0893514	0.422216	ENSSSCG00000017208
GO:0016255	attachment of GPI anchor to protein	BP	1	5	0.0893514	0.422216	ENSSSCG00000038329
GO:0019348	dolichol metabolic process	BP	1	5	0.0893514	0.422216	ENSSSCG00000032481
GO:0019852	L-ascorbic acid metabolic process	BP	1	5	0.0893514	0.422216	ENSSSCG00000010610
GO:0032053	ciliary basal body organization	BP	1	5	0.0893514	0.422216	ENSSSCG00000032574
GO:0032364	oxygen homeostasis	BP	1	5	0.0893514	0.422216	ENSSSCG00000008002
GO:0032493	response to bacterial lipoprotein	BP	1	5	0.0893514	0.422216	ENSSSCG00000026592
GO:0032571	response to vitamin K	BP	1	5	0.0893514	0.422216	ENSSSCG00000005859
GO:0033153	T cell receptor V(D)J recombination	BP	1	5	0.0893514	0.422216	ENSSSCG00000009540
GO:0033182	regulation of histone ubiquitination	BP	1	5	0.0893514	0.422216	ENSSSCG00000002469
GO:0034723	DNA replication-dependent nucleosome organization	BP	1	5	0.0893514	0.422216	ENSSSCG00000012056
GO:0035426	extracellular matrix-cell signaling	BP	1	5	0.0893514	0.422216	ENSSSCG00000012885
GO:0035747	natural killer cell chemotaxis	BP	1	5	0.0893514	0.422216	ENSSSCG00000014310
GO:0036150	phosphatidylserine acyl-chain remodeling	BP	1	5	0.0893514	0.422216	ENSSSCG00000001078
GO:0044381	glucose import in response to insulin stimulus	BP	1	5	0.0893514	0.422216	ENSSSCG00000023915
GO:0044849	estrous cycle	BP	1	5	0.0893514	0.422216	ENSSSCG00000016522
GO:0045906	negative regulation of vasoconstriction	BP	1	5	0.0893514	0.422216	ENSSSCG00000013408
GO:0046063	dCMP metabolic process	BP	1	5	0.0893514	0.422216	ENSSSCG00000028210
GO:0046079	dUMP catabolic process	BP	1	5	0.0893514	0.422216	ENSSSCG00000028210
GO:0046689	response to mercury ion	BP	1	5	0.0893514	0.422216	ENSSSCG00000033190
GO:0046874	quinolinate metabolic process	BP	1	5	0.0893514	0.422216	ENSSSCG00000038660
GO:0046877	regulation of saliva secretion	BP	1	5	0.0893514	0.422216	ENSSSCG00000033190
GO:0046984	regulation of hemoglobin biosynthetic process	BP	1	5	0.0893514	0.422216	ENSSSCG00000010188
GO:0048165	fused antrum stage	BP	1	5	0.0893514	0.422216	ENSSSCG00000011727
GO:0051295	establishment of meiotic spindle localization	BP	1	5	0.0893514	0.422216	ENSSSCG00000039769
GO:0051792	medium-chain fatty acid biosynthetic process	BP	1	5	0.0893514	0.422216	ENSSSCG00000028010
GO:0051793	medium-chain fatty acid catabolic process	BP	1	5	0.0893514	0.422216	ENSSSCG00000028010
GO:0060374	mast cell differentiation	BP	1	5	0.0893514	0.422216	ENSSSCG00000040875
GO:0060456	positive regulation of digestive system process	BP	1	5	0.0893514	0.422216	ENSSSCG00000033190
GO:0061304	retinal blood vessel morphogenesis	BP	1	5	0.0893514	0.422216	ENSSSCG00000012885
GO:0070173	regulation of enamel mineralization	BP	1	5	0.0893514	0.422216	ENSSSCG00000009220
GO:0070245	positive regulation of thymocyte apoptotic process	BP	1	5	0.0893514	0.422216	ENSSSCG00000010772
GO:0070295	renal water absorption	BP	1	5	0.0893514	0.422216	ENSSSCG00000033190
GO:0071372	cellular response to follicle-stimulating hormone stimulus	BP	1	5	0.0893514	0.422216	ENSSSCG00000036520
GO:0071731	response to nitric oxide	BP	1	5	0.0893514	0.422216	ENSSSCG00000033190
GO:0072236	metanephric loop of Henle development	BP	1	5	0.0893514	0.422216	ENSSSCG00000033190
GO:0072239	metanephric glomerulus vasculature development	BP	1	5	0.0893514	0.422216	ENSSSCG00000033190
GO:0090186	regulation of pancreatic juice secretion	BP	1	5	0.0893514	0.422216	ENSSSCG00000013241
GO:0097104	postsynaptic membrane assembly	BP	1	5	0.0893514	0.422216	ENSSSCG00000013248
GO:0097105	presynaptic membrane assembly	BP	1	5	0.0893514	0.422216	ENSSSCG00000013248
GO:0097176	epoxide metabolic process	BP	1	5	0.0893514	0.422216	ENSSSCG00000028144
GO:0097421	liver regeneration	BP	1	5	0.0893514	0.422216	ENSSSCG00000007456
GO:0097646	calcitonin family receptor signaling pathway	BP	1	5	0.0893514	0.422216	ENSSSCG00000013408
GO:0097680	double-strand break repair via classical nonhomologous end joining	BP	1	5	0.0893514	0.422216	ENSSSCG00000009540
GO:0098704	carbohydrate import across plasma membrane	BP	1	5	0.0893514	0.422216	ENSSSCG00000024058
GO:0098840	protein transport along microtubule	BP	1	5	0.0893514	0.422216	ENSSSCG00000002921
GO:0099118	microtubule-based protein transport	BP	1	5	0.0893514	0.422216	ENSSSCG00000002921
GO:0140271	hexose import across plasma membrane	BP	1	5	0.0893514	0.422216	ENSSSCG00000024058
GO:1900006	positive regulation of dendrite development	BP	1	5	0.0893514	0.422216	ENSSSCG00000016522
GO:1900028	negative regulation of ruffle assembly	BP	1	5	0.0893514	0.422216	ENSSSCG00000005235
GO:1900045	negative regulation of protein K63-linked ubiquitination	BP	1	5	0.0893514	0.422216	ENSSSCG00000002469
GO:1901334	lactone metabolic process	BP	1	5	0.0893514	0.422216	ENSSSCG00000010610
GO:1901475	pyruvate transmembrane transport	BP	1	5	0.0893514	0.422216	ENSSSCG00000024018
GO:1901656	glycoside transport	BP	1	5	0.0893514	0.422216	ENSSSCG00000024058
GO:1903348	positive regulation of bicellular tight junction assembly	BP	1	5	0.0893514	0.422216	ENSSSCG00000029843
GO:1903911	positive regulation of receptor clustering	BP	1	5	0.0893514	0.422216	ENSSSCG00000013248
GO:1905279	regulation of retrograde transport, endosome to Golgi	BP	1	5	0.0893514	0.422216	ENSSSCG00000028755
GO:2000380	regulation of mesoderm development	BP	1	5	0.0893514	0.422216	ENSSSCG00000002906
GO:2000407	regulation of T cell extravasation	BP	1	5	0.0893514	0.422216	ENSSSCG00000001987
GO:2000501	regulation of natural killer cell chemotaxis	BP	1	5	0.0893514	0.422216	ENSSSCG00000014310
GO:2000698	positive regulation of epithelial cell differentiation involved in kidney development	BP	1	5	0.0893514	0.422216	ENSSSCG00000008745
GO:0048568	embryonic organ development	BP	11	374	0.0896774	0.423228	ENSSSCG00000006051;ENSSSCG00000009860;ENSSSCG00000012409;ENSSSCG00000013408;ENSSSCG00000017239;ENSSSCG00000021355;ENSSSCG00000025578;ENSSSCG00000029838;ENSSSCG00000034474;ENSSSCG00000038993;ENSSSCG00000040875
GO:0050660	flavin adenine dinucleotide binding	MF	3	87	0.216345	0.42363	ENSSSCG00000005859;ENSSSCG00000015268;ENSSSCG00000023929
GO:0005261	cation channel activity	MF	8	312	0.219407	0.428221	ENSSSCG00000002450;ENSSSCG00000004701;ENSSSCG00000012386;ENSSSCG00000015543;ENSSSCG00000023912;ENSSSCG00000029323;ENSSSCG00000033190;ENSSSCG00000042162
GO:0043167	ion binding	MF	93	4692	0.219766	0.428221	ENSSSCG00000000046;ENSSSCG00000000139;ENSSSCG00000000207;ENSSSCG00000000853;ENSSSCG00000000884;ENSSSCG00000001073;ENSSSCG00000001987;ENSSSCG00000002144;ENSSSCG00000002504;ENSSSCG00000002557;ENSSSCG00000002967;ENSSSCG00000003663;ENSSSCG00000003913;ENSSSCG00000004233;ENSSSCG00000004869;ENSSSCG00000005199;ENSSSCG00000005627;ENSSSCG00000005729;ENSSSCG00000005859;ENSSSCG00000006141;ENSSSCG00000006733;…
GO:0016757	glycosyltransferase activity	MF	7	266	0.221039	0.428858	ENSSSCG00000007572;ENSSSCG00000009524;ENSSSCG00000014874;ENSSSCG00000029291;ENSSSCG00000033780;ENSSSCG00000034976;ENSSSCG00000040556
GO:0004896	cytokine receptor activity	MF	3	88	0.221172	0.428858	ENSSSCG00000003801;ENSSSCG00000030088;ENSSSCG00000032135
GO:0042626	ATPase-coupled transmembrane transporter activity	MF	4	131	0.222707	0.430783	ENSSSCG00000010188;ENSSSCG00000012437;ENSSSCG00000017256;ENSSSCG00000038275
GO:0004197	cysteine-type endopeptidase activity	MF	3	89	0.226021	0.431126	ENSSSCG00000002967;ENSSSCG00000009140;ENSSSCG00000038329
GO:0042379	chemokine receptor binding	MF	2	49	0.228293	0.431126	ENSSSCG00000014310;ENSSSCG00000029990
GO:0002161	aminoacyl-tRNA editing activity	MF	1	14	0.229392	0.431126	ENSSSCG00000014411
GO:0005372	water transmembrane transporter activity	MF	1	14	0.229392	0.431126	ENSSSCG00000033190
GO:0008191	metalloendopeptidase inhibitor activity	MF	1	14	0.229392	0.431126	ENSSSCG00000032423
GO:0010181	FMN binding	MF	1	14	0.229392	0.431126	ENSSSCG00000005859
GO:0015172	acidic amino acid transmembrane transporter activity	MF	1	14	0.229392	0.431126	ENSSSCG00000015949
GO:0015929	hexosaminidase activity	MF	1	14	0.229392	0.431126	ENSSSCG00000016601
GO:0043495	protein-membrane adaptor activity	MF	1	14	0.229392	0.431126	ENSSSCG00000016792
GO:0046624	sphingolipid transporter activity	MF	1	14	0.229392	0.431126	ENSSSCG00000016682
GO:0047498	calcium-dependent phospholipase A2 activity	MF	1	14	0.229392	0.431126	ENSSSCG00000040569
GO:0070003	threonine-type peptidase activity	MF	1	14	0.229392	0.431126	ENSSSCG00000013065
GO:0051258	protein polymerization	BP	8	248	0.0914665	0.431134	ENSSSCG00000002921;ENSSSCG00000005235;ENSSSCG00000011246;ENSSSCG00000012517;ENSSSCG00000015632;ENSSSCG00000026108;ENSSSCG00000028695;ENSSSCG00000039769
GO:0042158	lipoprotein biosynthetic process	BP	4	92	0.0917301	0.431302	ENSSSCG00000002921;ENSSSCG00000029291;ENSSSCG00000032481;ENSSSCG00000038329
GO:0050796	regulation of insulin secretion	BP	4	92	0.0917301	0.431302	ENSSSCG00000012885;ENSSSCG00000034114;ENSSSCG00000036520;ENSSSCG00000042162
GO:0008168	methyltransferase activity	MF	6	223	0.230059	0.43136	ENSSSCG00000001073;ENSSSCG00000007717;ENSSSCG00000026812;ENSSSCG00000033766;ENSSSCG00000036387;ENSSSCG00000039712
GO:0015294	solute:cation symporter activity	MF	3	90	0.23089	0.431901	ENSSSCG00000010960;ENSSSCG00000024018;ENSSSCG00000024058
GO:0008289	lipid binding	MF	14	607	0.231587	0.432187	ENSSSCG00000002921;ENSSSCG00000008118;ENSSSCG00000008745;ENSSSCG00000011230;ENSSSCG00000011246;ENSSSCG00000016682;ENSSSCG00000020963;ENSSSCG00000024088;ENSSSCG00000026592;ENSSSCG00000027226;ENSSSCG00000029879;ENSSSCG00000037559;ENSSSCG00000039373;ENSSSCG00000040569
GO:0016331	morphogenesis of embryonic epithelium	BP	5	129	0.0922336	0.433132	ENSSSCG00000000884;ENSSSCG00000006051;ENSSSCG00000013408;ENSSSCG00000025578;ENSSSCG00000029838
GO:0061515	myeloid cell development	BP	3	58	0.0926673	0.43414	ENSSSCG00000010188;ENSSSCG00000034114;ENSSSCG00000040875
GO:0022414	reproductive process	BP	25	1018	0.0926777	0.43414	ENSSSCG00000000139;ENSSSCG00000002144;ENSSSCG00000002906;ENSSSCG00000004701;ENSSSCG00000007382;ENSSSCG00000007572;ENSSSCG00000009860;ENSSSCG00000011727;ENSSSCG00000012409;ENSSSCG00000013408;ENSSSCG00000014214;ENSSSCG00000016489;ENSSSCG00000016522;ENSSSCG00000016533;ENSSSCG00000016579;ENSSSCG00000016601;ENSSSCG00000017565;ENSSSCG00000021355;ENSSSCG00000023918;ENSSSCG00000026360;ENSSSCG00000029843;…
GO:0009790	embryo development	BP	23	925	0.0939269	0.437482	ENSSSCG00000000884;ENSSSCG00000002144;ENSSSCG00000002906;ENSSSCG00000006051;ENSSSCG00000007079;ENSSSCG00000007456;ENSSSCG00000007572;ENSSSCG00000009540;ENSSSCG00000009860;ENSSSCG00000012409;ENSSSCG00000012885;ENSSSCG00000013248;ENSSSCG00000013408;ENSSSCG00000017239;ENSSSCG00000021355;ENSSSCG00000025578;ENSSSCG00000026472;ENSSSCG00000026812;ENSSSCG00000029838;ENSSSCG00000034474;ENSSSCG00000034727;…
GO:0000003	reproduction	BP	25	1020	0.0942313	0.437482	ENSSSCG00000000139;ENSSSCG00000002144;ENSSSCG00000002906;ENSSSCG00000004701;ENSSSCG00000007382;ENSSSCG00000007572;ENSSSCG00000009860;ENSSSCG00000011727;ENSSSCG00000012409;ENSSSCG00000013408;ENSSSCG00000014214;ENSSSCG00000016489;ENSSSCG00000016522;ENSSSCG00000016533;ENSSSCG00000016579;ENSSSCG00000016601;ENSSSCG00000017565;ENSSSCG00000021355;ENSSSCG00000023918;ENSSSCG00000026360;ENSSSCG00000029843;…
GO:0006165	nucleoside diphosphate phosphorylation	BP	4	93	0.0945309	0.437482	ENSSSCG00000002504;ENSSSCG00000005627;ENSSSCG00000011169;ENSSSCG00000034213
GO:0034614	cellular response to reactive oxygen species	BP	4	93	0.0945309	0.437482	ENSSSCG00000001987;ENSSSCG00000010330;ENSSSCG00000021355;ENSSSCG00000033190
GO:0007143	female meiotic nuclear division	BP	2	28	0.094547	0.437482	ENSSSCG00000016489;ENSSSCG00000039769
GO:0008089	anterograde axonal transport	BP	2	28	0.094547	0.437482	ENSSSCG00000009649;ENSSSCG00000021355
GO:0009112	nucleobase metabolic process	BP	2	28	0.094547	0.437482	ENSSSCG00000029761;ENSSSCG00000036208
GO:0032890	regulation of organic acid transport	BP	2	28	0.094547	0.437482	ENSSSCG00000035893;ENSSSCG00000040569
GO:0045648	positive regulation of erythrocyte differentiation	BP	2	28	0.094547	0.437482	ENSSSCG00000007492;ENSSSCG00000010188
GO:0071470	cellular response to osmotic stress	BP	2	28	0.094547	0.437482	ENSSSCG00000023915;ENSSSCG00000033190
GO:0005507	copper ion binding	MF	2	50	0.235118	0.437749	ENSSSCG00000012437;ENSSSCG00000021355
GO:0019208	phosphatase regulator activity	MF	3	91	0.235779	0.437954	ENSSSCG00000016522;ENSSSCG00000017254;ENSSSCG00000022797
GO:0006955	immune response	BP	31	1309	0.0952695	0.440287	ENSSSCG00000001396;ENSSSCG00000001917;ENSSSCG00000001987;ENSSSCG00000003801;ENSSSCG00000005152;ENSSSCG00000006413;ENSSSCG00000007384;ENSSSCG00000007572;ENSSSCG00000009140;ENSSSCG00000009540;ENSSSCG00000010334;ENSSSCG00000010772;ENSSSCG00000011727;ENSSSCG00000012409;ENSSSCG00000013241;ENSSSCG00000014310;ENSSSCG00000015540;ENSSSCG00000024674;ENSSSCG00000024791;ENSSSCG00000024914;ENSSSCG00000026592;…
GO:0043169	cation binding	MF	61	3030	0.241462	0.443178	ENSSSCG00000000046;ENSSSCG00000000207;ENSSSCG00000000853;ENSSSCG00000001073;ENSSSCG00000002144;ENSSSCG00000002557;ENSSSCG00000002967;ENSSSCG00000003663;ENSSSCG00000003913;ENSSSCG00000004233;ENSSSCG00000004869;ENSSSCG00000005199;ENSSSCG00000006141;ENSSSCG00000006733;ENSSSCG00000007243;ENSSSCG00000007456;ENSSSCG00000007572;ENSSSCG00000008072;ENSSSCG00000008124;ENSSSCG00000008816;ENSSSCG00000010772;…
GO:0005506	iron ion binding	MF	5	181	0.242235	0.443178	ENSSSCG00000000046;ENSSSCG00000025953;ENSSSCG00000029879;ENSSSCG00000038660;ENSSSCG00000039244
GO:0005451	monovalent cation:proton antiporter activity	MF	1	15	0.243608	0.443178	ENSSSCG00000023918
GO:0010314	phosphatidylinositol-5-phosphate binding	MF	1	15	0.243608	0.443178	ENSSSCG00000039373
GO:0015556	C4-dicarboxylate transmembrane transporter activity	MF	1	15	0.243608	0.443178	ENSSSCG00000015949
GO:0030552	cAMP binding	MF	1	15	0.243608	0.443178	ENSSSCG00000011363
GO:0051139	metal ion:proton antiporter activity	MF	1	15	0.243608	0.443178	ENSSSCG00000023918
GO:0098918	structural constituent of synapse	MF	1	15	0.243608	0.443178	ENSSSCG00000009649
GO:1904047	S-adenosyl-L-methionine binding	MF	1	15	0.243608	0.443178	ENSSSCG00000001073
GO:0022836	gated channel activity	MF	8	322	0.244374	0.443556	ENSSSCG00000004701;ENSSSCG00000006932;ENSSSCG00000012386;ENSSSCG00000015543;ENSSSCG00000029323;ENSSSCG00000033190;ENSSSCG00000038275;ENSSSCG00000042162
GO:0005126	cytokine receptor binding	MF	6	228	0.245159	0.443772	ENSSSCG00000003801;ENSSSCG00000005152;ENSSSCG00000014310;ENSSSCG00000029990;ENSSSCG00000031075;ENSSSCG00000036520
GO:0005179	hormone activity	MF	3	93	0.24561	0.443772	ENSSSCG00000005216;ENSSSCG00000013408;ENSSSCG00000036893
GO:0008194	UDP-glycosyltransferase activity	MF	4	137	0.246454	0.444288	ENSSSCG00000007572;ENSSSCG00000014874;ENSSSCG00000033780;ENSSSCG00000034976
GO:0048468	cell development	BP	37	1603	0.0965311	0.445574	ENSSSCG00000000139;ENSSSCG00000002144;ENSSSCG00000003146;ENSSSCG00000004701;ENSSSCG00000005235;ENSSSCG00000005380;ENSSSCG00000006051;ENSSSCG00000007079;ENSSSCG00000007382;ENSSSCG00000007456;ENSSSCG00000009540;ENSSSCG00000009649;ENSSSCG00000009860;ENSSSCG00000010188;ENSSSCG00000011727;ENSSSCG00000012392;ENSSSCG00000012885;ENSSSCG00000013248;ENSSSCG00000013408;ENSSSCG00000016489;ENSSSCG00000016522;…
GO:1901505	carbohydrate derivative transmembrane transporter activity	MF	2	52	0.248799	0.447047	ENSSSCG00000010960;ENSSSCG00000024058
GO:0008236	serine-type peptidase activity	MF	5	183	0.249109	0.447047	ENSSSCG00000007760;ENSSSCG00000024914;ENSSSCG00000029879;ENSSSCG00000034792;ENSSSCG00000035337
GO:0015081	sodium ion transmembrane transporter activity	MF	4	138	0.250466	0.447611	ENSSSCG00000002450;ENSSSCG00000010960;ENSSSCG00000023918;ENSSSCG00000024058
GO:0004553	hydrolase activity, hydrolyzing O-glycosyl compounds	MF	3	94	0.250549	0.447611	ENSSSCG00000016601;ENSSSCG00000021638;ENSSSCG00000034213
GO:0008276	protein methyltransferase activity	MF	3	95	0.255504	0.448059	ENSSSCG00000033766;ENSSSCG00000036387;ENSSSCG00000039712
GO:0016706	2-oxoglutarate-dependent dioxygenase activity	MF	2	53	0.255651	0.448059	ENSSSCG00000025953;ENSSSCG00000039244
GO:0000062	fatty-acyl-CoA binding	MF	1	16	0.257564	0.448059	ENSSSCG00000037559
GO:0004089	carbonate dehydratase activity	MF	1	16	0.257564	0.448059	ENSSSCG00000006141
GO:0004745	NAD-retinol dehydrogenase activity	MF	1	16	0.257564	0.448059	ENSSSCG00000015930
GO:0005092	GDP-dissociation inhibitor activity	MF	1	16	0.257564	0.448059	ENSSSCG00000031212
GO:0008381	mechanosensitive ion channel activity	MF	1	16	0.257564	0.448059	ENSSSCG00000012386
GO:0016408	C-acyltransferase activity	MF	1	16	0.257564	0.448059	ENSSSCG00000029945
GO:0030371	translation repressor activity	MF	1	16	0.257564	0.448059	ENSSSCG00000036208
GO:0051010	microtubule plus-end binding	MF	1	16	0.257564	0.448059	ENSSSCG00000002921
GO:0097153	cysteine-type endopeptidase activity involved in apoptotic process	MF	1	16	0.257564	0.448059	ENSSSCG00000009140
GO:1901567	fatty acid derivative binding	MF	1	16	0.257564	0.448059	ENSSSCG00000037559
GO:0043467	regulation of generation of precursor metabolites and energy	BP	4	94	0.0973719	0.448907	ENSSSCG00000010330;ENSSSCG00000011169;ENSSSCG00000022797;ENSSSCG00000041289
GO:0097367	carbohydrate derivative binding	MF	40	1951	0.258953	0.449493	ENSSSCG00000000139;ENSSSCG00000000884;ENSSSCG00000001987;ENSSSCG00000002504;ENSSSCG00000002921;ENSSSCG00000003913;ENSSSCG00000005627;ENSSSCG00000005729;ENSSSCG00000005859;ENSSSCG00000006733;ENSSSCG00000009540;ENSSSCG00000009638;ENSSSCG00000010188;ENSSSCG00000011363;ENSSSCG00000011827;ENSSSCG00000012336;ENSSSCG00000012392;ENSSSCG00000012437;ENSSSCG00000014080;ENSSSCG00000014411;ENSSSCG00000015462;…
GO:0010975	regulation of neuron projection development	BP	8	252	0.0979829	0.450835	ENSSSCG00000005235;ENSSSCG00000009649;ENSSSCG00000009860;ENSSSCG00000013248;ENSSSCG00000016522;ENSSSCG00000024674;ENSSSCG00000032423;ENSSSCG00000036520
GO:0052548	regulation of endopeptidase activity	BP	10	337	0.0980282	0.450835	ENSSSCG00000000884;ENSSSCG00000001989;ENSSSCG00000002479;ENSSSCG00000007384;ENSSSCG00000012960;ENSSSCG00000028871;ENSSSCG00000029879;ENSSSCG00000032423;ENSSSCG00000033190;ENSSSCG00000034213
GO:0015833	peptide transport	BP	6	171	0.0991616	0.451888	ENSSSCG00000012885;ENSSSCG00000033190;ENSSSCG00000034114;ENSSSCG00000035893;ENSSSCG00000036520;ENSSSCG00000042162
GO:0016125	sterol metabolic process	BP	4	95	0.100252	0.451888	ENSSSCG00000012885;ENSSSCG00000014080;ENSSSCG00000021355;ENSSSCG00000036808
GO:0046939	nucleotide phosphorylation	BP	4	95	0.100252	0.451888	ENSSSCG00000002504;ENSSSCG00000005627;ENSSSCG00000011169;ENSSSCG00000034213
GO:1902652	secondary alcohol metabolic process	BP	4	95	0.100252	0.451888	ENSSSCG00000012885;ENSSSCG00000014080;ENSSSCG00000021355;ENSSSCG00000036808
GO:0002063	chondrocyte development	BP	2	29	0.100353	0.451888	ENSSSCG00000007456;ENSSSCG00000036893
GO:0002691	regulation of cellular extravasation	BP	2	29	0.100353	0.451888	ENSSSCG00000001987;ENSSSCG00000010772
GO:0021591	ventricular system development	BP	2	29	0.100353	0.451888	ENSSSCG00000033190;ENSSSCG00000040416
GO:0045124	regulation of bone resorption	BP	2	29	0.100353	0.451888	ENSSSCG00000010772;ENSSSCG00000015136
GO:0060071	Wnt signaling pathway, planar cell polarity pathway	BP	2	29	0.100353	0.451888	ENSSSCG00000006051;ENSSSCG00000029838
GO:0097502	mannosylation	BP	2	29	0.100353	0.451888	ENSSSCG00000009524;ENSSSCG00000029291
GO:0033043	regulation of organelle organization	BP	23	934	0.10148	0.451888	ENSSSCG00000000135;ENSSSCG00000001989;ENSSSCG00000002921;ENSSSCG00000005235;ENSSSCG00000006957;ENSSSCG00000009540;ENSSSCG00000010330;ENSSSCG00000011246;ENSSSCG00000012336;ENSSSCG00000012392;ENSSSCG00000012517;ENSSSCG00000012885;ENSSSCG00000014214;ENSSSCG00000016489;ENSSSCG00000016533;ENSSSCG00000023788;ENSSSCG00000026108;ENSSSCG00000028359;ENSSSCG00000028695;ENSSSCG00000032297;ENSSSCG00000036520;…
GO:0002225	positive regulation of antimicrobial peptide production	BP	1	6	0.106243	0.451888	ENSSSCG00000034792
GO:0002424	T cell mediated immune response to tumor cell	BP	1	6	0.106243	0.451888	ENSSSCG00000015540
GO:0002428	antigen processing and presentation of peptide antigen via MHC class Ib	BP	1	6	0.106243	0.451888	ENSSSCG00000001396
GO:0002476	antigen processing and presentation of endogenous peptide antigen via MHC class Ib	BP	1	6	0.106243	0.451888	ENSSSCG00000001396
GO:0002786	regulation of antibacterial peptide production	BP	1	6	0.106243	0.451888	ENSSSCG00000034792
GO:0002840	regulation of T cell mediated immune response to tumor cell	BP	1	6	0.106243	0.451888	ENSSSCG00000015540
GO:0003175	tricuspid valve development	BP	1	6	0.106243	0.451888	ENSSSCG00000040875
GO:0006481	C-terminal protein methylation	BP	1	6	0.106243	0.451888	ENSSSCG00000039712
GO:0006528	asparagine metabolic process	BP	1	6	0.106243	0.451888	ENSSSCG00000013065
GO:0006545	glycine biosynthetic process	BP	1	6	0.106243	0.451888	ENSSSCG00000036208
GO:0006689	ganglioside catabolic process	BP	1	6	0.106243	0.451888	ENSSSCG00000021638
GO:0008635	activation of cysteine-type endopeptidase activity involved in apoptotic process by cytochrome c	BP	1	6	0.106243	0.451888	ENSSSCG00000000884
GO:0009131	pyrimidine nucleoside monophosphate catabolic process	BP	1	6	0.106243	0.451888	ENSSSCG00000028210
GO:0009178	pyrimidine deoxyribonucleoside monophosphate catabolic process	BP	1	6	0.106243	0.451888	ENSSSCG00000028210
GO:0009222	pyrimidine ribonucleotide catabolic process	BP	1	6	0.106243	0.451888	ENSSSCG00000028210
GO:0009249	protein lipoylation	BP	1	6	0.106243	0.451888	ENSSSCG00000040203
GO:0014807	regulation of somitogenesis	BP	1	6	0.106243	0.451888	ENSSSCG00000007572
GO:0016093	polyprenol metabolic process	BP	1	6	0.106243	0.451888	ENSSSCG00000032481
GO:0018344	protein geranylgeranylation	BP	1	6	0.106243	0.451888	ENSSSCG00000031212
GO:0019441	tryptophan catabolic process to kynurenine	BP	1	6	0.106243	0.451888	ENSSSCG00000033636
GO:0032354	response to follicle-stimulating hormone	BP	1	6	0.106243	0.451888	ENSSSCG00000036520
GO:0032713	negative regulation of interleukin-4 production	BP	1	6	0.106243	0.451888	ENSSSCG00000040875
GO:0033152	immunoglobulin V(D)J recombination	BP	1	6	0.106243	0.451888	ENSSSCG00000009540
GO:0033299	secretion of lysosomal enzymes	BP	1	6	0.106243	0.451888	ENSSSCG00000013241
GO:0033483	gas homeostasis	BP	1	6	0.106243	0.451888	ENSSSCG00000008002
GO:0035434	copper ion transmembrane transport	BP	1	6	0.106243	0.451888	ENSSSCG00000012437
GO:0035635	entry of bacterium into host cell	BP	1	6	0.106243	0.451888	ENSSSCG00000000985
GO:0040038	polar body extrusion after meiotic divisions	BP	1	6	0.106243	0.451888	ENSSSCG00000039769
GO:0043471	regulation of cellular carbohydrate catabolic process	BP	1	6	0.106243	0.451888	ENSSSCG00000022797
GO:0043569	negative regulation of insulin-like growth factor receptor signaling pathway	BP	1	6	0.106243	0.451888	ENSSSCG00000004928
GO:0045338	farnesyl diphosphate metabolic process	BP	1	6	0.106243	0.451888	ENSSSCG00000036808
GO:0046055	dGMP catabolic process	BP	1	6	0.106243	0.451888	ENSSSCG00000028210
GO:0046078	dUMP metabolic process	BP	1	6	0.106243	0.451888	ENSSSCG00000028210
GO:0046655	folic acid metabolic process	BP	1	6	0.106243	0.451888	ENSSSCG00000036208
GO:0051026	chiasma assembly	BP	1	6	0.106243	0.451888	ENSSSCG00000002144
GO:0051124	synaptic assembly at neuromuscular junction	BP	1	6	0.106243	0.451888	ENSSSCG00000013248
GO:0051458	corticotropin secretion	BP	1	6	0.106243	0.451888	ENSSSCG00000033190
GO:0051799	negative regulation of hair follicle development	BP	1	6	0.106243	0.451888	ENSSSCG00000023162
GO:0051957	positive regulation of amino acid transport	BP	1	6	0.106243	0.451888	ENSSSCG00000035893
GO:0060215	primitive hemopoiesis	BP	1	6	0.106243	0.451888	ENSSSCG00000040875
GO:0061181	regulation of chondrocyte development	BP	1	6	0.106243	0.451888	ENSSSCG00000036893
GO:0070669	response to interleukin-2	BP	1	6	0.106243	0.451888	ENSSSCG00000012409
GO:0071107	response to parathyroid hormone	BP	1	6	0.106243	0.451888	ENSSSCG00000012409
GO:0072014	proximal tubule development	BP	1	6	0.106243	0.451888	ENSSSCG00000033190
GO:0072679	thymocyte migration	BP	1	6	0.106243	0.451888	ENSSSCG00000010772
GO:0090324	negative regulation of oxidative phosphorylation	BP	1	6	0.106243	0.451888	ENSSSCG00000010330
GO:0097090	presynaptic membrane organization	BP	1	6	0.106243	0.451888	ENSSSCG00000013248
GO:1900222	negative regulation of amyloid-beta clearance	BP	1	6	0.106243	0.451888	ENSSSCG00000014080
GO:1900272	negative regulation of long-term synaptic potentiation	BP	1	6	0.106243	0.451888	ENSSSCG00000016522
GO:1902915	negative regulation of protein polyubiquitination	BP	1	6	0.106243	0.451888	ENSSSCG00000002469
GO:1903764	regulation of potassium ion export across plasma membrane	BP	1	6	0.106243	0.451888	ENSSSCG00000029323
GO:2000347	positive regulation of hepatocyte proliferation	BP	1	6	0.106243	0.451888	ENSSSCG00000016522
GO:2000391	positive regulation of neutrophil extravasation	BP	1	6	0.106243	0.451888	ENSSSCG00000010772
GO:2000535	regulation of entry of bacterium into host cell	BP	1	6	0.106243	0.451888	ENSSSCG00000000985
GO:0032941	secretion by tissue	BP	2	30	0.106256	0.451888	ENSSSCG00000013241;ENSSSCG00000033190
GO:0043462	regulation of ATPase activity	BP	2	30	0.106256	0.451888	ENSSSCG00000010330;ENSSSCG00000029879
GO:0030198	extracellular matrix organization	BP	8	257	0.106489	0.452368	ENSSSCG00000005380;ENSSSCG00000007456;ENSSSCG00000009220;ENSSSCG00000011727;ENSSSCG00000012121;ENSSSCG00000023322;ENSSSCG00000034792;ENSSSCG00000036007
GO:0031528	microvillus membrane	CC	2	16	0.0339524	0.454102	ENSSSCG00000008118;ENSSSCG00000008745
GO:0005958	DNA-dependent protein kinase-DNA ligase 4 complex	CC	1	2	0.0363356	0.454102	ENSSSCG00000009540
GO:0032010	phagolysosome	CC	1	2	0.0363356	0.454102	ENSSSCG00000010772
GO:0033186	CAF-1 complex	CC	1	2	0.0363356	0.454102	ENSSSCG00000012056
GO:0035355	Toll-like receptor 2-Toll-like receptor 6 protein complex	CC	1	2	0.0363356	0.454102	ENSSSCG00000026592
GO:0043293	apoptosome	CC	1	2	0.0363356	0.454102	ENSSSCG00000000884
GO:0071133	alpha9-beta1 integrin-ADAM8 complex	CC	1	2	0.0363356	0.454102	ENSSSCG00000010772
GO:0072536	interleukin-23 receptor complex	CC	1	2	0.0363356	0.454102	ENSSSCG00000003801
GO:0120206	photoreceptor distal connecting cilium	CC	1	2	0.0363356	0.454102	ENSSSCG00000029843
GO:1990221	L-cysteine desulfurase complex	CC	1	2	0.0363356	0.454102	ENSSSCG00000031269
GO:1990794	basolateral part of cell	CC	1	2	0.0363356	0.454102	ENSSSCG00000029323
GO:0000145	exocyst	CC	2	17	0.0380218	0.454102	ENSSSCG00000000985;ENSSSCG00000036871
GO:0036064	ciliary basal body	CC	6	138	0.0418623	0.454102	ENSSSCG00000000920;ENSSSCG00000012125;ENSSSCG00000023788;ENSSSCG00000029843;ENSSSCG00000032574;ENSSSCG00000039977
GO:0005929	cilium	CC	16	546	0.0449065	0.454102	ENSSSCG00000000139;ENSSSCG00000000920;ENSSSCG00000002450;ENSSSCG00000005627;ENSSSCG00000008118;ENSSSCG00000008745;ENSSSCG00000011363;ENSSSCG00000012125;ENSSSCG00000023788;ENSSSCG00000023918;ENSSSCG00000029843;ENSSSCG00000029990;ENSSSCG00000032574;ENSSSCG00000039244;ENSSSCG00000039977;ENSSSCG00000040416
GO:0098552	side of membrane	CC	14	461	0.0457267	0.454102	ENSSSCG00000001396;ENSSSCG00000001917;ENSSSCG00000005284;ENSSSCG00000015540;ENSSSCG00000017932;ENSSSCG00000021638;ENSSSCG00000023584;ENSSSCG00000023915;ENSSSCG00000030088;ENSSSCG00000032135;ENSSSCG00000032525;ENSSSCG00000035574;ENSSSCG00000036520;ENSSSCG00000036553
GO:0005604	basement membrane	CC	4	74	0.0469845	0.454102	ENSSSCG00000003146;ENSSSCG00000005380;ENSSSCG00000012121;ENSSSCG00000036520
GO:0005802	trans-Golgi network	CC	7	180	0.0484553	0.454102	ENSSSCG00000002921;ENSSSCG00000006762;ENSSSCG00000012074;ENSSSCG00000012437;ENSSSCG00000016682;ENSSSCG00000023915;ENSSSCG00000028755
GO:0055038	recycling endosome membrane	CC	3	45	0.0492492	0.454102	ENSSSCG00000002921;ENSSSCG00000021638;ENSSSCG00000038275
GO:0045178	basal part of cell	CC	7	183	0.0520992	0.454102	ENSSSCG00000000385;ENSSSCG00000000978;ENSSSCG00000012030;ENSSSCG00000012437;ENSSSCG00000024018;ENSSSCG00000029323;ENSSSCG00000033190
GO:0008282	inward rectifying potassium channel	CC	1	3	0.0540067	0.454102	ENSSSCG00000042162
GO:0009328	phenylalanine-tRNA ligase complex	CC	1	3	0.0540067	0.454102	ENSSSCG00000032016
GO:0033185	dolichol-phosphate-mannose synthase complex	CC	1	3	0.0540067	0.454102	ENSSSCG00000032481
GO:0044294	dendritic growth cone	CC	1	3	0.0540067	0.454102	ENSSSCG00000015632
GO:0099160	postsynaptic intermediate filament cytoskeleton	CC	1	3	0.0540067	0.454102	ENSSSCG00000009649
GO:0120001	apical plasma membrane urothelial plaque	CC	1	3	0.0540067	0.454102	ENSSSCG00000031423
GO:0016324	apical plasma membrane	CC	8	224	0.0548977	0.454102	ENSSSCG00000002450;ENSSSCG00000008118;ENSSSCG00000008745;ENSSSCG00000024018;ENSSSCG00000024058;ENSSSCG00000031423;ENSSSCG00000033190;ENSSSCG00000038275
GO:0031301	integral component of organelle membrane	CC	10	305	0.0553993	0.454102	ENSSSCG00000001396;ENSSSCG00000007572;ENSSSCG00000010188;ENSSSCG00000015930;ENSSSCG00000016792;ENSSSCG00000017208;ENSSSCG00000032481;ENSSSCG00000034213;ENSSSCG00000038329;ENSSSCG00000039769
GO:0016323	basolateral plasma membrane	CC	6	152	0.0614077	0.454102	ENSSSCG00000000385;ENSSSCG00000000978;ENSSSCG00000012030;ENSSSCG00000012437;ENSSSCG00000024018;ENSSSCG00000033190
GO:0046930	pore complex	CC	2	23	0.065859	0.454102	ENSSSCG00000010330;ENSSSCG00000016570
GO:0031901	early endosome membrane	CC	4	83	0.0662148	0.454102	ENSSSCG00000002921;ENSSSCG00000015540;ENSSSCG00000021638;ENSSSCG00000038275
GO:0001520	outer dense fiber	CC	1	4	0.0713547	0.454102	ENSSSCG00000005627
GO:0005968	Rab-protein geranylgeranyltransferase complex	CC	1	4	0.0713547	0.454102	ENSSSCG00000031212
GO:0030124	AP-4 adaptor complex	CC	1	4	0.0713547	0.454102	ENSSSCG00000006762
GO:0031467	Cul7-RING ubiquitin ligase complex	CC	1	4	0.0713547	0.454102	ENSSSCG00000009860
GO:0031501	mannosyltransferase complex	CC	1	4	0.0713547	0.454102	ENSSSCG00000032481
GO:0032021	NELF complex	CC	1	4	0.0713547	0.454102	ENSSSCG00000001423
GO:0032127	dense core granule membrane	CC	1	4	0.0713547	0.454102	ENSSSCG00000010772
GO:0035658	Mon1-Ccz1 complex	CC	1	4	0.0713547	0.454102	ENSSSCG00000002701
GO:0071953	elastic fiber	CC	1	4	0.0713547	0.454102	ENSSSCG00000036007
GO:0097209	epidermal lamellar body	CC	1	4	0.0713547	0.454102	ENSSSCG00000034792
GO:0099128	mitochondrial iron-sulfur cluster assembly complex	CC	1	4	0.0713547	0.454102	ENSSSCG00000031269
GO:1990357	terminal web	CC	1	4	0.0713547	0.454102	ENSSSCG00000015632
GO:0031300	intrinsic component of organelle membrane	CC	10	321	0.0726012	0.454102	ENSSSCG00000001396;ENSSSCG00000007572;ENSSSCG00000010188;ENSSSCG00000015930;ENSSSCG00000016792;ENSSSCG00000017208;ENSSSCG00000032481;ENSSSCG00000034213;ENSSSCG00000038329;ENSSSCG00000039769
GO:0045121	membrane raft	CC	7	201	0.0775256	0.454102	ENSSSCG00000000978;ENSSSCG00000002921;ENSSSCG00000006003;ENSSSCG00000011363;ENSSSCG00000023915;ENSSSCG00000029323;ENSSSCG00000033190
GO:0098857	membrane microdomain	CC	7	201	0.0775256	0.454102	ENSSSCG00000000978;ENSSSCG00000002921;ENSSSCG00000006003;ENSSSCG00000011363;ENSSSCG00000023915;ENSSSCG00000029323;ENSSSCG00000033190
GO:0031982	vesicle	CC	34	1447	0.0807693	0.454102	ENSSSCG00000000978;ENSSSCG00000001396;ENSSSCG00000002450;ENSSSCG00000002701;ENSSSCG00000002921;ENSSSCG00000005203;ENSSSCG00000008118;ENSSSCG00000008745;ENSSSCG00000010772;ENSSSCG00000011851;ENSSSCG00000012063;ENSSSCG00000012074;ENSSSCG00000012392;ENSSSCG00000012437;ENSSSCG00000014214;ENSSSCG00000015540;ENSSSCG00000016579;ENSSSCG00000016601;ENSSSCG00000021238;ENSSSCG00000021355;ENSSSCG00000021638;…
GO:0097731	9+0 non-motile cilium	CC	4	89	0.0809797	0.454102	ENSSSCG00000002450;ENSSSCG00000008745;ENSSSCG00000029843;ENSSSCG00000039244
GO:0012505	endomembrane system	CC	66	3053	0.081396	0.454102	ENSSSCG00000000046;ENSSSCG00000000135;ENSSSCG00000000139;ENSSSCG00000000978;ENSSSCG00000001396;ENSSSCG00000002701;ENSSSCG00000002921;ENSSSCG00000004364;ENSSSCG00000005203;ENSSSCG00000005729;ENSSSCG00000006762;ENSSSCG00000007456;ENSSSCG00000007572;ENSSSCG00000008745;ENSSSCG00000009524;ENSSSCG00000009860;ENSSSCG00000009963;ENSSSCG00000010772;ENSSSCG00000011827;ENSSSCG00000011851;ENSSSCG00000012063;…
GO:0030176	integral component of endoplasmic reticulum membrane	CC	5	126	0.082406	0.454102	ENSSSCG00000001396;ENSSSCG00000015930;ENSSSCG00000016792;ENSSSCG00000032481;ENSSSCG00000038329
GO:0098590	plasma membrane region	CC	21	828	0.0838304	0.454102	ENSSSCG00000000385;ENSSSCG00000000978;ENSSSCG00000002450;ENSSSCG00000005235;ENSSSCG00000007079;ENSSSCG00000008118;ENSSSCG00000008745;ENSSSCG00000010960;ENSSSCG00000011363;ENSSSCG00000012030;ENSSSCG00000012437;ENSSSCG00000021238;ENSSSCG00000024018;ENSSSCG00000024058;ENSSSCG00000027118;ENSSSCG00000027226;ENSSSCG00000031423;ENSSSCG00000033190;ENSSSCG00000035893;ENSSSCG00000038275;ENSSSCG00000040416
GO:0031253	cell projection membrane	CC	7	205	0.084011	0.454102	ENSSSCG00000005235;ENSSSCG00000008118;ENSSSCG00000008745;ENSSSCG00000010960;ENSSSCG00000033190;ENSSSCG00000035893;ENSSSCG00000040416
GO:0030140	trans-Golgi network transport vesicle	CC	2	27	0.0871573	0.454102	ENSSSCG00000012437;ENSSSCG00000023915
GO:0031012	extracellular matrix	CC	10	333	0.0874933	0.454102	ENSSSCG00000003146;ENSSSCG00000004928;ENSSSCG00000005380;ENSSSCG00000008072;ENSSSCG00000009220;ENSSSCG00000011727;ENSSSCG00000012121;ENSSSCG00000023322;ENSSSCG00000036007;ENSSSCG00000036520
GO:0000938	GARP complex	CC	1	5	0.0883855	0.454102	ENSSSCG00000028755
GO:0030061	mitochondrial crista	CC	1	5	0.0883855	0.454102	ENSSSCG00000036387
GO:0030314	junctional membrane complex	CC	1	5	0.0883855	0.454102	ENSSSCG00000031692
GO:0042765	GPI-anchor transamidase complex	CC	1	5	0.0883855	0.454102	ENSSSCG00000038329
GO:0070820	tertiary granule	CC	1	5	0.0883855	0.454102	ENSSSCG00000010772
GO:0097361	CIA complex	CC	1	5	0.0883855	0.454102	ENSSSCG00000008002
GO:0097574	lateral part of cell	CC	1	5	0.0883855	0.454102	ENSSSCG00000029323
GO:1990393	3M complex	CC	1	5	0.0883855	0.454102	ENSSSCG00000009860
GO:1990745	EARP complex	CC	1	5	0.0883855	0.454102	ENSSSCG00000028755
GO:0030312	external encapsulating structure	CC	10	334	0.088812	0.454102	ENSSSCG00000003146;ENSSSCG00000004928;ENSSSCG00000005380;ENSSSCG00000008072;ENSSSCG00000009220;ENSSSCG00000011727;ENSSSCG00000012121;ENSSSCG00000023322;ENSSSCG00000036007;ENSSSCG00000036520
GO:0009925	basal plasma membrane	CC	6	168	0.0893845	0.454102	ENSSSCG00000000385;ENSSSCG00000000978;ENSSSCG00000012030;ENSSSCG00000012437;ENSSSCG00000024018;ENSSSCG00000033190
GO:0019005	SCF ubiquitin ligase complex	CC	3	58	0.0903298	0.454102	ENSSSCG00000004873;ENSSSCG00000009860;ENSSSCG00000014314
GO:0055037	recycling endosome	CC	5	130	0.0912304	0.454102	ENSSSCG00000000978;ENSSSCG00000002921;ENSSSCG00000021638;ENSSSCG00000028755;ENSSSCG00000038275
GO:0017171	serine hydrolase activity	MF	5	187	0.263004	0.455529	ENSSSCG00000007760;ENSSSCG00000024914;ENSSSCG00000029879;ENSSSCG00000034792;ENSSSCG00000035337
GO:0033673	negative regulation of kinase activity	BP	6	175	0.107626	0.456686	ENSSSCG00000011363;ENSSSCG00000012885;ENSSSCG00000014080;ENSSSCG00000015136;ENSSSCG00000016489;ENSSSCG00000033586
GO:0045229	external encapsulating structure organization	BP	8	258	0.108238	0.458768	ENSSSCG00000005380;ENSSSCG00000007456;ENSSSCG00000009220;ENSSSCG00000011727;ENSSSCG00000012121;ENSSSCG00000023322;ENSSSCG00000034792;ENSSSCG00000036007
GO:0004521	endoribonuclease activity	MF	2	55	0.269361	0.461785	ENSSSCG00000012367;ENSSSCG00000033116
GO:0048029	monosaccharide binding	MF	2	55	0.269361	0.461785	ENSSSCG00000025953;ENSSSCG00000039244
GO:0140098	catalytic activity, acting on RNA	MF	8	332	0.270232	0.461785	ENSSSCG00000005615;ENSSSCG00000005729;ENSSSCG00000012367;ENSSSCG00000014411;ENSSSCG00000024444;ENSSSCG00000026812;ENSSSCG00000032016;ENSSSCG00000033116
GO:0004198	calcium-dependent cysteine-type endopeptidase activity	MF	1	17	0.271262	0.461785	ENSSSCG00000002967
GO:0005229	intracellular calcium activated chloride channel activity	MF	1	17	0.271262	0.461785	ENSSSCG00000006932
GO:0015095	magnesium ion transmembrane transporter activity	MF	1	17	0.271262	0.461785	ENSSSCG00000031267
GO:0035615	clathrin adaptor activity	MF	1	17	0.271262	0.461785	ENSSSCG00000024088
GO:0061778	intracellular chloride channel activity	MF	1	17	0.271262	0.461785	ENSSSCG00000006932
GO:0009749	response to glucose	BP	4	98	0.109127	0.462021	ENSSSCG00000012885;ENSSSCG00000034114;ENSSSCG00000035893;ENSSSCG00000036520
GO:0043062	extracellular structure organization	BP	8	259	0.110002	0.465205	ENSSSCG00000005380;ENSSSCG00000007456;ENSSSCG00000009220;ENSSSCG00000011727;ENSSSCG00000012121;ENSSSCG00000023322;ENSSSCG00000034792;ENSSSCG00000036007
GO:0098660	inorganic ion transmembrane transport	BP	19	755	0.110293	0.465912	ENSSSCG00000000385;ENSSSCG00000002450;ENSSSCG00000006932;ENSSSCG00000010330;ENSSSCG00000010960;ENSSSCG00000012386;ENSSSCG00000012437;ENSSSCG00000015136;ENSSSCG00000015543;ENSSSCG00000023912;ENSSSCG00000023918;ENSSSCG00000024058;ENSSSCG00000029323;ENSSSCG00000031267;ENSSSCG00000033190;ENSSSCG00000036387;ENSSSCG00000038264;ENSSSCG00000038275;ENSSSCG00000042162
GO:0098662	inorganic cation transmembrane transport	BP	17	662	0.110525	0.466028	ENSSSCG00000000385;ENSSSCG00000002450;ENSSSCG00000010330;ENSSSCG00000010960;ENSSSCG00000012386;ENSSSCG00000012437;ENSSSCG00000015136;ENSSSCG00000015543;ENSSSCG00000023912;ENSSSCG00000023918;ENSSSCG00000024058;ENSSSCG00000029323;ENSSSCG00000031267;ENSSSCG00000033190;ENSSSCG00000036387;ENSSSCG00000038264;ENSSSCG00000042162
GO:1905114	cell surface receptor signaling pathway involved in cell-cell signaling	BP	12	434	0.110583	0.466028	ENSSSCG00000002906;ENSSSCG00000005235;ENSSSCG00000006051;ENSSSCG00000007456;ENSSSCG00000008081;ENSSSCG00000012885;ENSSSCG00000013248;ENSSSCG00000023162;ENSSSCG00000027928;ENSSSCG00000028995;ENSSSCG00000029838;ENSSSCG00000029843
GO:0007276	gamete generation	BP	13	479	0.110689	0.466028	ENSSSCG00000000139;ENSSSCG00000002144;ENSSSCG00000004701;ENSSSCG00000007382;ENSSSCG00000011727;ENSSSCG00000016489;ENSSSCG00000016522;ENSSSCG00000016533;ENSSSCG00000016579;ENSSSCG00000017565;ENSSSCG00000021355;ENSSSCG00000029990;ENSSSCG00000039769
GO:0002262	myeloid cell homeostasis	BP	5	137	0.111602	0.468195	ENSSSCG00000002906;ENSSSCG00000007492;ENSSSCG00000010188;ENSSSCG00000021355;ENSSSCG00000040875
GO:0030178	negative regulation of Wnt signaling pathway	BP	5	137	0.111602	0.468195	ENSSSCG00000006051;ENSSSCG00000008081;ENSSSCG00000013248;ENSSSCG00000028995;ENSSSCG00000029843
GO:0032729	positive regulation of interferon-gamma production	BP	3	63	0.111699	0.468195	ENSSSCG00000001917;ENSSSCG00000003801;ENSSSCG00000040875
GO:0045638	negative regulation of myeloid cell differentiation	BP	3	63	0.111699	0.468195	ENSSSCG00000015136;ENSSSCG00000034114;ENSSSCG00000040875
GO:0060348	bone development	BP	6	177	0.111994	0.46843	ENSSSCG00000007456;ENSSSCG00000012885;ENSSSCG00000017254;ENSSSCG00000029879;ENSSSCG00000034114;ENSSSCG00000040875
GO:0001556	oocyte maturation	BP	2	31	0.11225	0.46843	ENSSSCG00000007382;ENSSSCG00000016489
GO:0034142	toll-like receptor 4 signaling pathway	BP	2	31	0.11225	0.46843	ENSSSCG00000013241;ENSSSCG00000029879
GO:0042558	pteridine-containing compound metabolic process	BP	2	31	0.11225	0.46843	ENSSSCG00000036208;ENSSSCG00000037637
GO:0009607	response to biotic stimulus	BP	24	994	0.112375	0.468434	ENSSSCG00000001987;ENSSSCG00000003801;ENSSSCG00000005152;ENSSSCG00000006141;ENSSSCG00000007384;ENSSSCG00000009140;ENSSSCG00000010334;ENSSSCG00000010772;ENSSSCG00000011727;ENSSSCG00000012409;ENSSSCG00000013241;ENSSSCG00000014310;ENSSSCG00000015540;ENSSSCG00000024914;ENSSSCG00000026592;ENSSSCG00000029879;ENSSSCG00000029990;ENSSSCG00000031075;ENSSSCG00000033190;ENSSSCG00000034792;ENSSSCG00000035170;…
GO:0030003	cellular cation homeostasis	BP	13	482	0.114586	0.47292	ENSSSCG00000000135;ENSSSCG00000000385;ENSSSCG00000002450;ENSSSCG00000009524;ENSSSCG00000012386;ENSSSCG00000012437;ENSSSCG00000015136;ENSSSCG00000015543;ENSSSCG00000021355;ENSSSCG00000023918;ENSSSCG00000024674;ENSSSCG00000027928;ENSSSCG00000038057
GO:0030154	cell differentiation	BP	66	3091	0.115277	0.47292	ENSSSCG00000000139;ENSSSCG00000001987;ENSSSCG00000002144;ENSSSCG00000002906;ENSSSCG00000002921;ENSSSCG00000003146;ENSSSCG00000004701;ENSSSCG00000005152;ENSSSCG00000005235;ENSSSCG00000005380;ENSSSCG00000005594;ENSSSCG00000006051;ENSSSCG00000007079;ENSSSCG00000007382;ENSSSCG00000007456;ENSSSCG00000007492;ENSSSCG00000007572;ENSSSCG00000008002;ENSSSCG00000008081;ENSSSCG00000008745;ENSSSCG00000008898;…
GO:0031397	negative regulation of protein ubiquitination	BP	3	64	0.115672	0.47292	ENSSSCG00000002469;ENSSSCG00000012336;ENSSSCG00000040470
GO:0044703	multi-organism reproductive process	BP	17	667	0.116041	0.47292	ENSSSCG00000000139;ENSSSCG00000002144;ENSSSCG00000004701;ENSSSCG00000007382;ENSSSCG00000011727;ENSSSCG00000014214;ENSSSCG00000016489;ENSSSCG00000016522;ENSSSCG00000016533;ENSSSCG00000016579;ENSSSCG00000016601;ENSSSCG00000017565;ENSSSCG00000021355;ENSSSCG00000026360;ENSSSCG00000029990;ENSSSCG00000039769;ENSSSCG00000040416
GO:0055065	metal ion homeostasis	BP	13	484	0.117227	0.47292	ENSSSCG00000000135;ENSSSCG00000000385;ENSSSCG00000002450;ENSSSCG00000009524;ENSSSCG00000012386;ENSSSCG00000012437;ENSSSCG00000015136;ENSSSCG00000015543;ENSSSCG00000021355;ENSSSCG00000024674;ENSSSCG00000029304;ENSSSCG00000031423;ENSSSCG00000038057
GO:0060284	regulation of cell development	BP	10	350	0.117536	0.47292	ENSSSCG00000005235;ENSSSCG00000009540;ENSSSCG00000009649;ENSSSCG00000009860;ENSSSCG00000013248;ENSSSCG00000016489;ENSSSCG00000016522;ENSSSCG00000034114;ENSSSCG00000036520;ENSSSCG00000036893
GO:0031175	neuron projection development	BP	17	669	0.118293	0.47292	ENSSSCG00000000139;ENSSSCG00000003146;ENSSSCG00000005235;ENSSSCG00000006051;ENSSSCG00000007079;ENSSSCG00000009649;ENSSSCG00000009860;ENSSSCG00000012392;ENSSSCG00000013248;ENSSSCG00000016522;ENSSSCG00000021355;ENSSSCG00000024674;ENSSSCG00000032423;ENSSSCG00000035074;ENSSSCG00000036520;ENSSSCG00000040416;ENSSSCG00000040569
GO:0006584	catecholamine metabolic process	BP	2	32	0.118329	0.47292	ENSSSCG00000012589;ENSSSCG00000022009
GO:0009072	aromatic amino acid family metabolic process	BP	2	32	0.118329	0.47292	ENSSSCG00000033636;ENSSSCG00000038660
GO:0009712	catechol-containing compound metabolic process	BP	2	32	0.118329	0.47292	ENSSSCG00000012589;ENSSSCG00000022009
GO:0033141	positive regulation of peptidyl-serine phosphorylation of STAT protein	BP	2	32	0.118329	0.47292	ENSSSCG00000005152;ENSSSCG00000031075
GO:0042743	hydrogen peroxide metabolic process	BP	2	32	0.118329	0.47292	ENSSSCG00000021355;ENSSSCG00000036438
GO:0048536	spleen development	BP	2	32	0.118329	0.47292	ENSSSCG00000001987;ENSSSCG00000008081
GO:0060412	ventricular septum morphogenesis	BP	2	32	0.118329	0.47292	ENSSSCG00000029838;ENSSSCG00000040875
GO:0090175	regulation of establishment of planar polarity	BP	2	32	0.118329	0.47292	ENSSSCG00000006051;ENSSSCG00000029838
GO:0090199	regulation of release of cytochrome c from mitochondria	BP	2	32	0.118329	0.47292	ENSSSCG00000001989;ENSSSCG00000010330
GO:0098751	bone cell development	BP	2	32	0.118329	0.47292	ENSSSCG00000034114;ENSSSCG00000040875
GO:2000403	positive regulation of lymphocyte migration	BP	2	32	0.118329	0.47292	ENSSSCG00000010772;ENSSSCG00000014310
GO:0003158	endothelium development	BP	4	101	0.118341	0.47292	ENSSSCG00000002906;ENSSSCG00000005380;ENSSSCG00000008081;ENSSSCG00000029838
GO:0009746	response to hexose	BP	4	101	0.118341	0.47292	ENSSSCG00000012885;ENSSSCG00000034114;ENSSSCG00000035893;ENSSSCG00000036520
GO:0046683	response to organophosphorus	BP	3	65	0.119698	0.47292	ENSSSCG00000012409;ENSSSCG00000033190;ENSSSCG00000042162
GO:1903578	regulation of ATP metabolic process	BP	3	65	0.119698	0.47292	ENSSSCG00000010330;ENSSSCG00000011169;ENSSSCG00000036387
GO:0006661	phosphatidylinositol biosynthetic process	BP	4	102	0.121486	0.47292	ENSSSCG00000008233;ENSSSCG00000029291;ENSSSCG00000032481;ENSSSCG00000038329
GO:0034284	response to monosaccharide	BP	4	102	0.121486	0.47292	ENSSSCG00000012885;ENSSSCG00000034114;ENSSSCG00000035893;ENSSSCG00000036520
GO:0045667	regulation of osteoblast differentiation	BP	4	102	0.121486	0.47292	ENSSSCG00000006051;ENSSSCG00000012409;ENSSSCG00000012885;ENSSSCG00000029879
GO:0046165	alcohol biosynthetic process	BP	4	102	0.121486	0.47292	ENSSSCG00000014080;ENSSSCG00000021355;ENSSSCG00000034213;ENSSSCG00000036808
GO:0021915	neural tube development	BP	5	141	0.121967	0.47292	ENSSSCG00000000884;ENSSSCG00000006051;ENSSSCG00000013408;ENSSSCG00000025578;ENSSSCG00000029838
GO:0002682	regulation of immune system process	BP	26	1101	0.122079	0.47292	ENSSSCG00000001917;ENSSSCG00000001987;ENSSSCG00000003801;ENSSSCG00000005203;ENSSSCG00000006413;ENSSSCG00000007492;ENSSSCG00000009140;ENSSSCG00000010188;ENSSSCG00000010772;ENSSSCG00000012392;ENSSSCG00000013241;ENSSSCG00000014310;ENSSSCG00000015136;ENSSSCG00000015540;ENSSSCG00000016522;ENSSSCG00000024791;ENSSSCG00000024914;ENSSSCG00000026592;ENSSSCG00000028359;ENSSSCG00000029879;ENSSSCG00000034114;…
GO:0002232	leukocyte chemotaxis involved in inflammatory response	BP	1	7	0.122822	0.47292	ENSSSCG00000016522
GO:0002760	positive regulation of antimicrobial humoral response	BP	1	7	0.122822	0.47292	ENSSSCG00000034792
GO:0003344	pericardium morphogenesis	BP	1	7	0.122822	0.47292	ENSSSCG00000007079
GO:0006204	IMP catabolic process	BP	1	7	0.122822	0.47292	ENSSSCG00000028210
GO:0006283	transcription-coupled nucleotide-excision repair	BP	1	7	0.122822	0.47292	ENSSSCG00000037035
GO:0007406	negative regulation of neuroblast proliferation	BP	1	7	0.122822	0.47292	ENSSSCG00000016522
GO:0008228	opsonization	BP	1	7	0.122822	0.47292	ENSSSCG00000011727
GO:0009650	UV protection	BP	1	7	0.122822	0.47292	ENSSSCG00000036007
GO:0010887	negative regulation of cholesterol storage	BP	1	7	0.122822	0.47292	ENSSSCG00000013241
GO:0015727	lactate transport	BP	1	7	0.122822	0.47292	ENSSSCG00000024018
GO:0015793	glycerol transport	BP	1	7	0.122822	0.47292	ENSSSCG00000033190
GO:0015810	aspartate transmembrane transport	BP	1	7	0.122822	0.47292	ENSSSCG00000015949
GO:0015858	nucleoside transport	BP	1	7	0.122822	0.47292	ENSSSCG00000010960
GO:0030320	cellular monovalent inorganic anion homeostasis	BP	1	7	0.122822	0.47292	ENSSSCG00000029323
GO:0030644	cellular chloride ion homeostasis	BP	1	7	0.122822	0.47292	ENSSSCG00000029323
GO:0030952	establishment or maintenance of cytoskeleton polarity	BP	1	7	0.122822	0.47292	ENSSSCG00000033190
GO:0031100	animal organ regeneration	BP	1	7	0.122822	0.47292	ENSSSCG00000007456
GO:0031665	negative regulation of lipopolysaccharide-mediated signaling pathway	BP	1	7	0.122822	0.47292	ENSSSCG00000029879
GO:0032930	positive regulation of superoxide anion generation	BP	1	7	0.122822	0.47292	ENSSSCG00000021355
GO:0033601	positive regulation of mammary gland epithelial cell proliferation	BP	1	7	0.122822	0.47292	ENSSSCG00000015828
GO:0035873	lactate transmembrane transport	BP	1	7	0.122822	0.47292	ENSSSCG00000024018
GO:0036089	cleavage furrow formation	BP	1	7	0.122822	0.47292	ENSSSCG00000039769
GO:0042045	epithelial fluid transport	BP	1	7	0.122822	0.47292	ENSSSCG00000033190
GO:0042178	xenobiotic catabolic process	BP	1	7	0.122822	0.47292	ENSSSCG00000000046
GO:0044848	biological phase	BP	1	7	0.122822	0.47292	ENSSSCG00000023162
GO:0044851	hair cycle phase	BP	1	7	0.122822	0.47292	ENSSSCG00000023162
GO:0045656	negative regulation of monocyte differentiation	BP	1	7	0.122822	0.47292	ENSSSCG00000034114
GO:0046054	dGMP metabolic process	BP	1	7	0.122822	0.47292	ENSSSCG00000028210
GO:0046322	negative regulation of fatty acid oxidation	BP	1	7	0.122822	0.47292	ENSSSCG00000015268
GO:0048819	regulation of hair follicle maturation	BP	1	7	0.122822	0.47292	ENSSSCG00000023162
GO:0060022	hard palate development	BP	1	7	0.122822	0.47292	ENSSSCG00000029838
GO:0060087	relaxation of vascular associated smooth muscle	BP	1	7	0.122822	0.47292	ENSSSCG00000021355
GO:0060158	phospholipase C-activating dopamine receptor signaling pathway	BP	1	7	0.122822	0.47292	ENSSSCG00000005284
GO:0060392	negative regulation of SMAD protein signal transduction	BP	1	7	0.122822	0.47292	ENSSSCG00000004928
GO:0071493	cellular response to UV-B	BP	1	7	0.122822	0.47292	ENSSSCG00000036007
GO:0090521	glomerular visceral epithelial cell migration	BP	1	7	0.122822	0.47292	ENSSSCG00000005235
GO:0140059	dendrite arborization	BP	1	7	0.122822	0.47292	ENSSSCG00000016522
GO:0150094	amyloid-beta clearance by cellular catabolic process	BP	1	7	0.122822	0.47292	ENSSSCG00000013248
GO:1901642	nucleoside transmembrane transport	BP	1	7	0.122822	0.47292	ENSSSCG00000010960
GO:1902177	positive regulation of oxidative stress-induced intrinsic apoptotic signaling pathway	BP	1	7	0.122822	0.47292	ENSSSCG00000021355
GO:1902260	negative regulation of delayed rectifier potassium channel activity	BP	1	7	0.122822	0.47292	ENSSSCG00000029323
GO:1902510	regulation of apoptotic DNA fragmentation	BP	1	7	0.122822	0.47292	ENSSSCG00000000884
GO:1902732	positive regulation of chondrocyte proliferation	BP	1	7	0.122822	0.47292	ENSSSCG00000029879
GO:1903624	regulation of DNA catabolic process	BP	1	7	0.122822	0.47292	ENSSSCG00000000884
GO:1903961	positive regulation of anion transmembrane transport	BP	1	7	0.122822	0.47292	ENSSSCG00000035893
GO:2000389	regulation of neutrophil extravasation	BP	1	7	0.122822	0.47292	ENSSSCG00000010772
GO:2001137	positive regulation of endocytic recycling	BP	1	7	0.122822	0.47292	ENSSSCG00000028755
GO:0045444	fat cell differentiation	BP	6	182	0.123301	0.474284	ENSSSCG00000002921;ENSSSCG00000012885;ENSSSCG00000016792;ENSSSCG00000023915;ENSSSCG00000040416;ENSSSCG00000040875
GO:0000287	magnesium ion binding	MF	5	192	0.280614	0.475511	ENSSSCG00000003913;ENSSSCG00000016489;ENSSSCG00000024674;ENSSSCG00000032016;ENSSSCG00000034758
GO:0008146	sulfotransferase activity	MF	2	57	0.283066	0.475511	ENSSSCG00000009963;ENSSSCG00000022153
GO:0016278	lysine N-methyltransferase activity	MF	2	57	0.283066	0.475511	ENSSSCG00000033766;ENSSSCG00000036387
GO:0016279	protein-lysine N-methyltransferase activity	MF	2	57	0.283066	0.475511	ENSSSCG00000033766;ENSSSCG00000036387
GO:0015662	P-type ion transporter activity	MF	1	18	0.284709	0.475511	ENSSSCG00000012437
GO:0042974	retinoic acid receptor binding	MF	1	18	0.284709	0.475511	ENSSSCG00000013241
GO:0047617	acyl-CoA hydrolase activity	MF	1	18	0.284709	0.475511	ENSSSCG00000037559
GO:0120014	phospholipid transfer activity	MF	1	18	0.284709	0.475511	ENSSSCG00000016682
GO:0120227	acyl-CoA binding	MF	1	18	0.284709	0.475511	ENSSSCG00000037559
GO:0070509	calcium ion import	BP	3	66	0.123775	0.475622	ENSSSCG00000002450;ENSSSCG00000012386;ENSSSCG00000015543
GO:0072521	purine-containing compound metabolic process	BP	10	354	0.123946	0.475795	ENSSSCG00000005627;ENSSSCG00000011169;ENSSSCG00000014080;ENSSSCG00000028210;ENSSSCG00000029761;ENSSSCG00000034213;ENSSSCG00000036208;ENSSSCG00000036387;ENSSSCG00000036808;ENSSSCG00000037559
GO:0008242	omega peptidase activity	MF	3	101	0.285479	0.475798	ENSSSCG00000002469;ENSSSCG00000013065;ENSSSCG00000037637
GO:0043029	T cell homeostasis	BP	2	33	0.124489	0.476912	ENSSSCG00000001987;ENSSSCG00000021728
GO:0071827	plasma lipoprotein particle organization	BP	2	33	0.124489	0.476912	ENSSSCG00000007243;ENSSSCG00000040569
GO:0008270	zinc ion binding	MF	15	687	0.286903	0.477171	ENSSSCG00000004233;ENSSSCG00000006141;ENSSSCG00000006733;ENSSSCG00000008816;ENSSSCG00000010772;ENSSSCG00000011157;ENSSSCG00000012589;ENSSSCG00000013241;ENSSSCG00000014214;ENSSSCG00000016793;ENSSSCG00000021355;ENSSSCG00000022953;ENSSSCG00000034066;ENSSSCG00000034758;ENSSSCG00000036208
GO:0030136	clathrin-coated vesicle	CC	4	95	0.097225	0.478563	ENSSSCG00000012437;ENSSSCG00000023915;ENSSSCG00000024088;ENSSSCG00000027226
GO:0062197	cellular response to chemical stress	BP	7	225	0.126066	0.482466	ENSSSCG00000001987;ENSSSCG00000010330;ENSSSCG00000016793;ENSSSCG00000021355;ENSSSCG00000023298;ENSSSCG00000023915;ENSSSCG00000033190
GO:0035725	sodium ion transmembrane transport	BP	5	143	0.127313	0.485766	ENSSSCG00000002450;ENSSSCG00000010960;ENSSSCG00000023918;ENSSSCG00000024058;ENSSSCG00000038264
GO:0046488	phosphatidylinositol metabolic process	BP	5	143	0.127313	0.485766	ENSSSCG00000008233;ENSSSCG00000012315;ENSSSCG00000029291;ENSSSCG00000032481;ENSSSCG00000038329
GO:0050769	positive regulation of neurogenesis	BP	5	143	0.127313	0.485766	ENSSSCG00000009540;ENSSSCG00000009649;ENSSSCG00000009860;ENSSSCG00000016522;ENSSSCG00000036520
GO:0031345	negative regulation of cell projection organization	BP	4	104	0.127881	0.48703	ENSSSCG00000005235;ENSSSCG00000013248;ENSSSCG00000023788;ENSSSCG00000032423
GO:0010769	regulation of cell morphogenesis involved in differentiation	BP	3	67	0.127902	0.48703	ENSSSCG00000005235;ENSSSCG00000009860;ENSSSCG00000036520
GO:0030234	enzyme regulator activity	MF	21	997	0.294478	0.488748	ENSSSCG00000000884;ENSSSCG00000001987;ENSSSCG00000002479;ENSSSCG00000004065;ENSSSCG00000007384;ENSSSCG00000010840;ENSSSCG00000011363;ENSSSCG00000012960;ENSSSCG00000014411;ENSSSCG00000016522;ENSSSCG00000017254;ENSSSCG00000017328;ENSSSCG00000022797;ENSSSCG00000023788;ENSSSCG00000028871;ENSSSCG00000029879;ENSSSCG00000031212;ENSSSCG00000031736;ENSSSCG00000032423;ENSSSCG00000032481;ENSSSCG00000036465
GO:0005243	gap junction channel activity	MF	1	19	0.297908	0.489332	ENSSSCG00000012394
GO:0015299	solute:proton antiporter activity	MF	1	19	0.297908	0.489332	ENSSSCG00000023918
GO:0071855	neuropeptide receptor binding	MF	1	19	0.297908	0.489332	ENSSSCG00000038057
GO:0140103	catalytic activity, acting on a glycoprotein	MF	1	19	0.297908	0.489332	ENSSSCG00000033780
GO:0140312	cargo adaptor activity	MF	1	19	0.297908	0.489332	ENSSSCG00000024088
GO:0031227	intrinsic component of endoplasmic reticulum membrane	CC	5	134	0.100522	0.489355	ENSSSCG00000001396;ENSSSCG00000015930;ENSSSCG00000016792;ENSSSCG00000032481;ENSSSCG00000038329
GO:0090407	organophosphate biosynthetic process	BP	12	447	0.128982	0.490649	ENSSSCG00000002504;ENSSSCG00000005627;ENSSSCG00000008233;ENSSSCG00000015462;ENSSSCG00000029291;ENSSSCG00000032481;ENSSSCG00000033636;ENSSSCG00000034758;ENSSSCG00000036387;ENSSSCG00000036808;ENSSSCG00000038329;ENSSSCG00000038660
GO:0110053	regulation of actin filament organization	BP	7	227	0.13029	0.49249	ENSSSCG00000005235;ENSSSCG00000006957;ENSSSCG00000011246;ENSSSCG00000012517;ENSSSCG00000026108;ENSSSCG00000028695;ENSSSCG00000039769
GO:0051962	positive regulation of nervous system development	BP	6	185	0.130345	0.49249	ENSSSCG00000007079;ENSSSCG00000009540;ENSSSCG00000009649;ENSSSCG00000009860;ENSSSCG00000016522;ENSSSCG00000036520
GO:0008631	intrinsic apoptotic signaling pathway in response to oxidative stress	BP	2	34	0.130723	0.49249	ENSSSCG00000016793;ENSSSCG00000021355
GO:0048678	response to axon injury	BP	2	34	0.130723	0.49249	ENSSSCG00000009649;ENSSSCG00000021355
GO:0070232	regulation of T cell apoptotic process	BP	2	34	0.130723	0.49249	ENSSSCG00000001987;ENSSSCG00000010772
GO:0009141	nucleoside triphosphate metabolic process	BP	4	105	0.13113	0.49249	ENSSSCG00000002504;ENSSSCG00000004233;ENSSSCG00000005627;ENSSSCG00000036387
GO:0009247	glycolipid biosynthetic process	BP	3	68	0.132077	0.49249	ENSSSCG00000029291;ENSSSCG00000032481;ENSSSCG00000038329
GO:0000904	cell morphogenesis involved in differentiation	BP	14	541	0.132297	0.49249	ENSSSCG00000003146;ENSSSCG00000005235;ENSSSCG00000005380;ENSSSCG00000007079;ENSSSCG00000009649;ENSSSCG00000009860;ENSSSCG00000012392;ENSSSCG00000013248;ENSSSCG00000016522;ENSSSCG00000021355;ENSSSCG00000036520;ENSSSCG00000040416;ENSSSCG00000040569;ENSSSCG00000040875
GO:0045861	negative regulation of proteolysis	BP	8	271	0.132388	0.49249	ENSSSCG00000002479;ENSSSCG00000007384;ENSSSCG00000012960;ENSSSCG00000013241;ENSSSCG00000028871;ENSSSCG00000029879;ENSSSCG00000032423;ENSSSCG00000033190
GO:0043583	ear development	BP	6	186	0.132736	0.49249	ENSSSCG00000000139;ENSSSCG00000006051;ENSSSCG00000014310;ENSSSCG00000017239;ENSSSCG00000021355;ENSSSCG00000029838
GO:0006810	transport	BP	77	3689	0.133002	0.49249	ENSSSCG00000000139;ENSSSCG00000000385;ENSSSCG00000000978;ENSSSCG00000000985;ENSSSCG00000002450;ENSSSCG00000002701;ENSSSCG00000002921;ENSSSCG00000004701;ENSSSCG00000006003;ENSSSCG00000006762;ENSSSCG00000006932;ENSSSCG00000007814;ENSSSCG00000008118;ENSSSCG00000009649;ENSSSCG00000010188;ENSSSCG00000010330;ENSSSCG00000010960;ENSSSCG00000011230;ENSSSCG00000011641;ENSSSCG00000011727;ENSSSCG00000011827;…
GO:0120035	regulation of plasma membrane bounded cell projection organization	BP	11	405	0.134028	0.49249	ENSSSCG00000000135;ENSSSCG00000005235;ENSSSCG00000009649;ENSSSCG00000009860;ENSSSCG00000013248;ENSSSCG00000016522;ENSSSCG00000023788;ENSSSCG00000024674;ENSSSCG00000026108;ENSSSCG00000032423;ENSSSCG00000036520
GO:0001838	embryonic epithelial tube formation	BP	4	106	0.134414	0.49249	ENSSSCG00000000884;ENSSSCG00000006051;ENSSSCG00000013408;ENSSSCG00000029838
GO:0030218	erythrocyte differentiation	BP	4	106	0.134414	0.49249	ENSSSCG00000002906;ENSSSCG00000007492;ENSSSCG00000010188;ENSSSCG00000040875
GO:0042471	ear morphogenesis	BP	4	106	0.134414	0.49249	ENSSSCG00000006051;ENSSSCG00000017239;ENSSSCG00000021355;ENSSSCG00000029838
GO:0090596	sensory organ morphogenesis	BP	7	229	0.134584	0.49249	ENSSSCG00000006051;ENSSSCG00000008745;ENSSSCG00000012885;ENSSSCG00000017239;ENSSSCG00000021355;ENSSSCG00000029838;ENSSSCG00000033190
GO:1901214	regulation of neuron death	BP	6	187	0.135147	0.49249	ENSSSCG00000009540;ENSSSCG00000009649;ENSSSCG00000010772;ENSSSCG00000012409;ENSSSCG00000016792;ENSSSCG00000021355
GO:0033139	regulation of peptidyl-serine phosphorylation of STAT protein	BP	2	35	0.137028	0.49249	ENSSSCG00000005152;ENSSSCG00000031075
GO:0033363	secretory granule organization	BP	2	35	0.137028	0.49249	ENSSSCG00000016579;ENSSSCG00000033190
GO:0042572	retinol metabolic process	BP	2	35	0.137028	0.49249	ENSSSCG00000000046;ENSSSCG00000015930
GO:0046850	regulation of bone remodeling	BP	2	35	0.137028	0.49249	ENSSSCG00000010772;ENSSSCG00000015136
GO:0071825	protein-lipid complex subunit organization	BP	2	35	0.137028	0.49249	ENSSSCG00000007243;ENSSSCG00000040569
GO:0120163	negative regulation of cold-induced thermogenesis	BP	2	35	0.137028	0.49249	ENSSSCG00000013241;ENSSSCG00000017254
GO:0051704	multi-organism process	BP	17	685	0.137248	0.49249	ENSSSCG00000000139;ENSSSCG00000002144;ENSSSCG00000004701;ENSSSCG00000007382;ENSSSCG00000011727;ENSSSCG00000014214;ENSSSCG00000016489;ENSSSCG00000016522;ENSSSCG00000016533;ENSSSCG00000016579;ENSSSCG00000016601;ENSSSCG00000017565;ENSSSCG00000021355;ENSSSCG00000026360;ENSSSCG00000029990;ENSSSCG00000039769;ENSSSCG00000040416
GO:0003006	developmental process involved in reproduction	BP	17	686	0.138488	0.49249	ENSSSCG00000000139;ENSSSCG00000002144;ENSSSCG00000002906;ENSSSCG00000004701;ENSSSCG00000007382;ENSSSCG00000007572;ENSSSCG00000009860;ENSSSCG00000011727;ENSSSCG00000012409;ENSSSCG00000013408;ENSSSCG00000016489;ENSSSCG00000016522;ENSSSCG00000016533;ENSSSCG00000016579;ENSSSCG00000017565;ENSSSCG00000021355;ENSSSCG00000029990
GO:0002031	G protein-coupled receptor internalization	BP	1	8	0.139094	0.49249	ENSSSCG00000013408
GO:0002315	marginal zone B cell differentiation	BP	1	8	0.139094	0.49249	ENSSSCG00000007572
GO:0002778	antibacterial peptide production	BP	1	8	0.139094	0.49249	ENSSSCG00000034792
GO:0002784	regulation of antimicrobial peptide production	BP	1	8	0.139094	0.49249	ENSSSCG00000034792
GO:0003097	renal water transport	BP	1	8	0.139094	0.49249	ENSSSCG00000033190
GO:0006477	protein sulfation	BP	1	8	0.139094	0.49249	ENSSSCG00000009963
GO:0007217	tachykinin receptor signaling pathway	BP	1	8	0.139094	0.49249	ENSSSCG00000038057
GO:0009172	purine deoxyribonucleoside monophosphate catabolic process	BP	1	8	0.139094	0.49249	ENSSSCG00000028210
GO:0009176	pyrimidine deoxyribonucleoside monophosphate metabolic process	BP	1	8	0.139094	0.49249	ENSSSCG00000028210
GO:0009188	ribonucleoside diphosphate biosynthetic process	BP	1	8	0.139094	0.49249	ENSSSCG00000005627
GO:0009223	pyrimidine deoxyribonucleotide catabolic process	BP	1	8	0.139094	0.49249	ENSSSCG00000028210
GO:0009642	response to light intensity	BP	1	8	0.139094	0.49249	ENSSSCG00000002450
GO:0010958	regulation of amino acid import across plasma membrane	BP	1	8	0.139094	0.49249	ENSSSCG00000035893
GO:0015696	ammonium transport	BP	1	8	0.139094	0.49249	ENSSSCG00000033190
GO:0022605	mammalian oogenesis stage	BP	1	8	0.139094	0.49249	ENSSSCG00000011727
GO:0030309	poly-N-acetyllactosamine metabolic process	BP	1	8	0.139094	0.49249	ENSSSCG00000014874
GO:0030311	poly-N-acetyllactosamine biosynthetic process	BP	1	8	0.139094	0.49249	ENSSSCG00000014874
GO:0032287	peripheral nervous system myelin maintenance	BP	1	8	0.139094	0.49249	ENSSSCG00000021355
GO:0032306	regulation of prostaglandin secretion	BP	1	8	0.139094	0.49249	ENSSSCG00000040569
GO:0032308	positive regulation of prostaglandin secretion	BP	1	8	0.139094	0.49249	ENSSSCG00000040569
GO:0035860	glial cell-derived neurotrophic factor receptor signaling pathway	BP	1	8	0.139094	0.49249	ENSSSCG00000007456
GO:0042428	serotonin metabolic process	BP	1	8	0.139094	0.49249	ENSSSCG00000022009
GO:0042447	hormone catabolic process	BP	1	8	0.139094	0.49249	ENSSSCG00000009225
GO:0043252	sodium-independent organic anion transport	BP	1	8	0.139094	0.49249	ENSSSCG00000011641
GO:0043568	positive regulation of insulin-like growth factor receptor signaling pathway	BP	1	8	0.139094	0.49249	ENSSSCG00000023162
GO:0044650	adhesion of symbiont to host cell	BP	1	8	0.139094	0.49249	ENSSSCG00000010334
GO:0046541	saliva secretion	BP	1	8	0.139094	0.49249	ENSSSCG00000033190
GO:0048251	elastic fiber assembly	BP	1	8	0.139094	0.49249	ENSSSCG00000036007
GO:0048539	bone marrow development	BP	1	8	0.139094	0.49249	ENSSSCG00000012885
GO:0048672	positive regulation of collateral sprouting	BP	1	8	0.139094	0.49249	ENSSSCG00000036520
GO:0051006	positive regulation of lipoprotein lipase activity	BP	1	8	0.139094	0.49249	ENSSSCG00000013241
GO:0060296	regulation of cilium beat frequency involved in ciliary motility	BP	1	8	0.139094	0.49249	ENSSSCG00000040416
GO:0070070	proton-transporting V-type ATPase complex assembly	BP	1	8	0.139094	0.49249	ENSSSCG00000027928
GO:0070475	rRNA base methylation	BP	1	8	0.139094	0.49249	ENSSSCG00000026812
GO:0071340	skeletal muscle acetylcholine-gated channel clustering	BP	1	8	0.139094	0.49249	ENSSSCG00000013248
GO:0071578	zinc ion import across plasma membrane	BP	1	8	0.139094	0.49249	ENSSSCG00000000385
GO:0072488	ammonium transmembrane transport	BP	1	8	0.139094	0.49249	ENSSSCG00000033190
GO:0080154	regulation of fertilization	BP	1	8	0.139094	0.49249	ENSSSCG00000016489
GO:0097527	necroptotic signaling pathway	BP	1	8	0.139094	0.49249	ENSSSCG00000001987
GO:0099188	postsynaptic cytoskeleton organization	BP	1	8	0.139094	0.49249	ENSSSCG00000009649
GO:1901856	negative regulation of cellular respiration	BP	1	8	0.139094	0.49249	ENSSSCG00000010330
GO:1903651	positive regulation of cytoplasmic transport	BP	1	8	0.139094	0.49249	ENSSSCG00000028755
GO:1903789	regulation of amino acid transmembrane transport	BP	1	8	0.139094	0.49249	ENSSSCG00000035893
GO:1903817	negative regulation of voltage-gated potassium channel activity	BP	1	8	0.139094	0.49249	ENSSSCG00000029323
GO:1904667	negative regulation of ubiquitin protein ligase activity	BP	1	8	0.139094	0.49249	ENSSSCG00000040470
GO:1990034	calcium ion export across plasma membrane	BP	1	8	0.139094	0.49249	ENSSSCG00000002450
GO:2000480	negative regulation of cAMP-dependent protein kinase activity	BP	1	8	0.139094	0.49249	ENSSSCG00000011363
GO:2001204	regulation of osteoclast development	BP	1	8	0.139094	0.49249	ENSSSCG00000034114
GO:2001214	positive regulation of vasculogenesis	BP	1	8	0.139094	0.49249	ENSSSCG00000013408
GO:0099106	ion channel regulator activity	MF	3	104	0.30058	0.492703	ENSSSCG00000007760;ENSSSCG00000015083;ENSSSCG00000029323
GO:0006814	sodium ion transport	BP	6	189	0.140031	0.494881	ENSSSCG00000002450;ENSSSCG00000010960;ENSSSCG00000023918;ENSSSCG00000024058;ENSSSCG00000029323;ENSSSCG00000038264
GO:0034599	cellular response to oxidative stress	BP	6	189	0.140031	0.494881	ENSSSCG00000001987;ENSSSCG00000010330;ENSSSCG00000016793;ENSSSCG00000021355;ENSSSCG00000023298;ENSSSCG00000033190
GO:0034308	primary alcohol metabolic process	BP	3	70	0.140568	0.496315	ENSSSCG00000000046;ENSSSCG00000015462;ENSSSCG00000015930
GO:0032787	monocarboxylic acid metabolic process	BP	12	455	0.141104	0.497386	ENSSSCG00000000046;ENSSSCG00000011169;ENSSSCG00000013241;ENSSSCG00000015268;ENSSSCG00000015930;ENSSSCG00000025578;ENSSSCG00000028010;ENSSSCG00000032557;ENSSSCG00000034213;ENSSSCG00000037559;ENSSSCG00000038660;ENSSSCG00000039244
GO:0099111	microtubule-based transport	BP	5	148	0.141134	0.497386	ENSSSCG00000000139;ENSSSCG00000002921;ENSSSCG00000007814;ENSSSCG00000009649;ENSSSCG00000021355
GO:1901981	phosphatidylinositol phosphate binding	MF	4	152	0.30783	0.499267	ENSSSCG00000011246;ENSSSCG00000016682;ENSSSCG00000024088;ENSSSCG00000039373
GO:0140375	immune receptor activity	MF	3	106	0.310671	0.499267	ENSSSCG00000003801;ENSSSCG00000030088;ENSSSCG00000032135
GO:0005385	zinc ion transmembrane transporter activity	MF	1	20	0.310865	0.499267	ENSSSCG00000000385
GO:0008143	poly(A) binding	MF	1	20	0.310865	0.499267	ENSSSCG00000007382
GO:0015295	solute:proton symporter activity	MF	1	20	0.310865	0.499267	ENSSSCG00000024018
GO:0019211	phosphatase activator activity	MF	1	20	0.310865	0.499267	ENSSSCG00000017254
GO:0031683	G-protein beta/gamma-subunit complex binding	MF	1	20	0.310865	0.499267	ENSSSCG00000005284
GO:0034593	phosphatidylinositol bisphosphate phosphatase activity	MF	1	20	0.310865	0.499267	ENSSSCG00000012315
GO:0043531	ADP binding	MF	1	20	0.310865	0.499267	ENSSSCG00000000884
GO:0051427	hormone receptor binding	MF	1	20	0.310865	0.499267	ENSSSCG00000036893
GO:0048667	cell morphogenesis involved in neuron differentiation	BP	11	410	0.142134	0.500443	ENSSSCG00000003146;ENSSSCG00000007079;ENSSSCG00000009649;ENSSSCG00000009860;ENSSSCG00000012392;ENSSSCG00000013248;ENSSSCG00000016522;ENSSSCG00000021355;ENSSSCG00000036520;ENSSSCG00000040416;ENSSSCG00000040569
GO:0005757	mitochondrial permeability transition pore complex	CC	1	6	0.105105	0.500661	ENSSSCG00000010330
GO:0098981	cholinergic synapse	CC	1	6	0.105105	0.500661	ENSSSCG00000009649
GO:0052547	regulation of peptidase activity	BP	10	365	0.142537	0.501315	ENSSSCG00000000884;ENSSSCG00000001989;ENSSSCG00000002479;ENSSSCG00000007384;ENSSSCG00000012960;ENSSSCG00000028871;ENSSSCG00000029879;ENSSSCG00000032423;ENSSSCG00000033190;ENSSSCG00000034213
GO:0006809	nitric oxide biosynthetic process	BP	2	36	0.143399	0.501315	ENSSSCG00000010826;ENSSSCG00000011727
GO:0032768	regulation of monooxygenase activity	BP	2	36	0.143399	0.501315	ENSSSCG00000012437;ENSSSCG00000023162
GO:0043457	regulation of cellular respiration	BP	2	36	0.143399	0.501315	ENSSSCG00000010330;ENSSSCG00000041289
GO:0060193	positive regulation of lipase activity	BP	2	36	0.143399	0.501315	ENSSSCG00000013241;ENSSSCG00000024674
GO:0062208	positive regulation of pattern recognition receptor signaling pathway	BP	2	36	0.143399	0.501315	ENSSSCG00000013241;ENSSSCG00000029879
GO:0086009	membrane repolarization	BP	2	36	0.143399	0.501315	ENSSSCG00000002450;ENSSSCG00000029323
GO:0032940	secretion by cell	BP	14	549	0.143441	0.501315	ENSSSCG00000000985;ENSSSCG00000012885;ENSSSCG00000013241;ENSSSCG00000014080;ENSSSCG00000021238;ENSSSCG00000029304;ENSSSCG00000033190;ENSSSCG00000034114;ENSSSCG00000035893;ENSSSCG00000036520;ENSSSCG00000036871;ENSSSCG00000040569;ENSSSCG00000042162;ENSSSCG00000051585
GO:0008237	metallopeptidase activity	MF	5	201	0.312848	0.50144	ENSSSCG00000004869;ENSSSCG00000006932;ENSSSCG00000010772;ENSSSCG00000011157;ENSSSCG00000033116
GO:0046872	metal ion binding	MF	58	2950	0.314544	0.503144	ENSSSCG00000000046;ENSSSCG00000000207;ENSSSCG00000000853;ENSSSCG00000002144;ENSSSCG00000002557;ENSSSCG00000002967;ENSSSCG00000003663;ENSSSCG00000003913;ENSSSCG00000004233;ENSSSCG00000004869;ENSSSCG00000006141;ENSSSCG00000006733;ENSSSCG00000007243;ENSSSCG00000007456;ENSSSCG00000007572;ENSSSCG00000008072;ENSSSCG00000008124;ENSSSCG00000008816;ENSSSCG00000010772;ENSSSCG00000010826;ENSSSCG00000011157;…
GO:0140677	molecular function activator activity	MF	3	107	0.315721	0.504012	ENSSSCG00000016522;ENSSSCG00000031736;ENSSSCG00000032481
GO:0097553	calcium ion transmembrane import into cytosol	BP	4	109	0.144462	0.504361	ENSSSCG00000002450;ENSSSCG00000012386;ENSSSCG00000015136;ENSSSCG00000015543
GO:1901135	carbohydrate derivative metabolic process	BP	21	882	0.144579	0.504361	ENSSSCG00000002557;ENSSSCG00000005627;ENSSSCG00000007456;ENSSSCG00000009524;ENSSSCG00000011169;ENSSSCG00000011727;ENSSSCG00000014080;ENSSSCG00000014874;ENSSSCG00000016601;ENSSSCG00000017932;ENSSSCG00000021638;ENSSSCG00000023915;ENSSSCG00000028210;ENSSSCG00000029291;ENSSSCG00000032481;ENSSSCG00000034213;ENSSSCG00000036387;ENSSSCG00000036808;ENSSSCG00000037559;ENSSSCG00000038329;ENSSSCG00000040556
GO:0015297	antiporter activity	MF	2	62	0.317191	0.505023	ENSSSCG00000002450;ENSSSCG00000023918
GO:0016298	lipase activity	MF	3	108	0.320772	0.505023	ENSSSCG00000004233;ENSSSCG00000028010;ENSSSCG00000040569
GO:0003746	translation elongation factor activity	MF	1	21	0.323583	0.505023	ENSSSCG00000001423
GO:0005242	inward rectifier potassium channel activity	MF	1	21	0.323583	0.505023	ENSSSCG00000042162
GO:0008649	rRNA methyltransferase activity	MF	1	21	0.323583	0.505023	ENSSSCG00000026812
GO:0009975	cyclase activity	MF	1	21	0.323583	0.505023	ENSSSCG00000028359
GO:0015020	glucuronosyltransferase activity	MF	1	21	0.323583	0.505023	ENSSSCG00000034976
GO:0016289	CoA hydrolase activity	MF	1	21	0.323583	0.505023	ENSSSCG00000037559
GO:0033764	steroid dehydrogenase activity, acting on the CH-OH group of donors, NAD or NADP as acceptor	MF	1	21	0.323583	0.505023	ENSSSCG00000015930
GO:0099095	ligand-gated anion channel activity	MF	1	21	0.323583	0.505023	ENSSSCG00000038275
GO:0003724	RNA helicase activity	MF	2	63	0.323977	0.505023	ENSSSCG00000005729;ENSSSCG00000024444
GO:0015370	solute:sodium symporter activity	MF	2	63	0.323977	0.505023	ENSSSCG00000010960;ENSSSCG00000024058
GO:0005178	integrin binding	MF	3	109	0.325825	0.506909	ENSSSCG00000012121;ENSSSCG00000016522;ENSSSCG00000016900
GO:0097193	intrinsic apoptotic signaling pathway	BP	7	234	0.14562	0.507525	ENSSSCG00000000884;ENSSSCG00000001987;ENSSSCG00000007243;ENSSSCG00000009140;ENSSSCG00000010330;ENSSSCG00000016793;ENSSSCG00000021355
GO:0002252	immune effector process	BP	12	458	0.145804	0.507699	ENSSSCG00000001987;ENSSSCG00000005152;ENSSSCG00000007572;ENSSSCG00000009540;ENSSSCG00000011727;ENSSSCG00000015540;ENSSSCG00000024791;ENSSSCG00000024914;ENSSSCG00000031075;ENSSSCG00000034792;ENSSSCG00000035170;ENSSSCG00000036007
GO:0043065	positive regulation of apoptotic process	BP	10	367	0.146066	0.508142	ENSSSCG00000000884;ENSSSCG00000001987;ENSSSCG00000002921;ENSSSCG00000007243;ENSSSCG00000009140;ENSSSCG00000010772;ENSSSCG00000016793;ENSSSCG00000021355;ENSSSCG00000021728;ENSSSCG00000025578
GO:0048598	embryonic morphogenesis	BP	13	505	0.147071	0.511168	ENSSSCG00000000884;ENSSSCG00000002906;ENSSSCG00000006051;ENSSSCG00000007079;ENSSSCG00000012885;ENSSSCG00000013248;ENSSSCG00000013408;ENSSSCG00000017239;ENSSSCG00000021355;ENSSSCG00000025578;ENSSSCG00000029838;ENSSSCG00000034474;ENSSSCG00000038993
GO:0099023	vesicle tethering complex	CC	3	63	0.108955	0.51348	ENSSSCG00000000985;ENSSSCG00000028755;ENSSSCG00000036871
GO:0009743	response to carbohydrate	BP	4	110	0.147875	0.513494	ENSSSCG00000012885;ENSSSCG00000034114;ENSSSCG00000035893;ENSSSCG00000036520
GO:0016247	channel regulator activity	MF	3	110	0.330877	0.513764	ENSSSCG00000007760;ENSSSCG00000015083;ENSSSCG00000029323
GO:0001501	skeletal system development	BP	11	414	0.148802	0.513944	ENSSSCG00000007456;ENSSSCG00000012885;ENSSSCG00000017239;ENSSSCG00000017254;ENSSSCG00000029879;ENSSSCG00000034114;ENSSSCG00000034474;ENSSSCG00000036893;ENSSSCG00000038993;ENSSSCG00000040416;ENSSSCG00000040875
GO:0009117	nucleotide metabolic process	BP	11	414	0.148802	0.513944	ENSSSCG00000002504;ENSSSCG00000005627;ENSSSCG00000011169;ENSSSCG00000014080;ENSSSCG00000028210;ENSSSCG00000033636;ENSSSCG00000034213;ENSSSCG00000036387;ENSSSCG00000036808;ENSSSCG00000037559;ENSSSCG00000038660
GO:0009620	response to fungus	BP	2	37	0.14983	0.513944	ENSSSCG00000011727;ENSSSCG00000029879
GO:0042501	serine phosphorylation of STAT protein	BP	2	37	0.14983	0.513944	ENSSSCG00000005152;ENSSSCG00000031075
GO:0043277	apoptotic cell clearance	BP	2	37	0.14983	0.513944	ENSSSCG00000012392;ENSSSCG00000013241
GO:0050919	negative chemotaxis	BP	2	37	0.14983	0.513944	ENSSSCG00000007079;ENSSSCG00000036520
GO:0051785	positive regulation of nuclear division	BP	2	37	0.14983	0.513944	ENSSSCG00000012885;ENSSSCG00000016533
GO:2000404	regulation of T cell migration	BP	2	37	0.14983	0.513944	ENSSSCG00000001987;ENSSSCG00000010772
GO:0048666	neuron development	BP	19	791	0.150573	0.513944	ENSSSCG00000000139;ENSSSCG00000003146;ENSSSCG00000005235;ENSSSCG00000006051;ENSSSCG00000007079;ENSSSCG00000009649;ENSSSCG00000009860;ENSSSCG00000012392;ENSSSCG00000013248;ENSSSCG00000016522;ENSSSCG00000021355;ENSSSCG00000024674;ENSSSCG00000029838;ENSSSCG00000029843;ENSSSCG00000032423;ENSSSCG00000035074;ENSSSCG00000036520;ENSSSCG00000040416;ENSSSCG00000040569
GO:0048869	cellular developmental process	BP	66	3152	0.15151	0.513944	ENSSSCG00000000139;ENSSSCG00000001987;ENSSSCG00000002144;ENSSSCG00000002906;ENSSSCG00000002921;ENSSSCG00000003146;ENSSSCG00000004701;ENSSSCG00000005152;ENSSSCG00000005235;ENSSSCG00000005380;ENSSSCG00000005594;ENSSSCG00000006051;ENSSSCG00000007079;ENSSSCG00000007382;ENSSSCG00000007456;ENSSSCG00000007492;ENSSSCG00000007572;ENSSSCG00000008002;ENSSSCG00000008081;ENSSSCG00000008745;ENSSSCG00000008898;…
GO:0051130	positive regulation of cellular component organization	BP	19	792	0.151797	0.513944	ENSSSCG00000000135;ENSSSCG00000001989;ENSSSCG00000002921;ENSSSCG00000007079;ENSSSCG00000008118;ENSSSCG00000009540;ENSSSCG00000009649;ENSSSCG00000009860;ENSSSCG00000010330;ENSSSCG00000012336;ENSSSCG00000012885;ENSSSCG00000013248;ENSSSCG00000016522;ENSSSCG00000016533;ENSSSCG00000024674;ENSSSCG00000026108;ENSSSCG00000029843;ENSSSCG00000036520;ENSSSCG00000039769
GO:0001892	embryonic placenta development	BP	3	73	0.153635	0.513944	ENSSSCG00000009860;ENSSSCG00000012409;ENSSSCG00000013408
GO:0010977	negative regulation of neuron projection development	BP	3	73	0.153635	0.513944	ENSSSCG00000005235;ENSSSCG00000013248;ENSSSCG00000032423
GO:0002328	pro-B cell differentiation	BP	1	9	0.155066	0.513944	ENSSSCG00000009540
GO:0006449	regulation of translational termination	BP	1	9	0.155066	0.513944	ENSSSCG00000025953
GO:0006685	sphingomyelin catabolic process	BP	1	9	0.155066	0.513944	ENSSSCG00000004233
GO:0006750	glutathione biosynthetic process	BP	1	9	0.155066	0.513944	ENSSSCG00000031736
GO:0009113	purine nucleobase biosynthetic process	BP	1	9	0.155066	0.513944	ENSSSCG00000036208
GO:0009404	toxin metabolic process	BP	1	9	0.155066	0.513944	ENSSSCG00000015268
GO:0010763	positive regulation of fibroblast migration	BP	1	9	0.155066	0.513944	ENSSSCG00000033190
GO:0010838	positive regulation of keratinocyte proliferation	BP	1	9	0.155066	0.513944	ENSSSCG00000023162
GO:0015840	urea transport	BP	1	9	0.155066	0.513944	ENSSSCG00000031423
GO:0031115	negative regulation of microtubule polymerization	BP	1	9	0.155066	0.513944	ENSSSCG00000002921
GO:0032490	detection of molecule of bacterial origin	BP	1	9	0.155066	0.513944	ENSSSCG00000026592
GO:0032536	regulation of cell projection size	BP	1	9	0.155066	0.513944	ENSSSCG00000009649
GO:0032570	response to progesterone	BP	1	9	0.155066	0.513944	ENSSSCG00000013241
GO:0032906	transforming growth factor beta2 production	BP	1	9	0.155066	0.513944	ENSSSCG00000023162
GO:0032909	regulation of transforming growth factor beta2 production	BP	1	9	0.155066	0.513944	ENSSSCG00000023162
GO:0032928	regulation of superoxide anion generation	BP	1	9	0.155066	0.513944	ENSSSCG00000021355
GO:0033089	positive regulation of T cell differentiation in thymus	BP	1	9	0.155066	0.513944	ENSSSCG00000010772
GO:0033206	meiotic cytokinesis	BP	1	9	0.155066	0.513944	ENSSSCG00000039769
GO:0033234	negative regulation of protein sumoylation	BP	1	9	0.155066	0.513944	ENSSSCG00000012336
GO:0042448	progesterone metabolic process	BP	1	9	0.155066	0.513944	ENSSSCG00000015930
GO:0044557	relaxation of smooth muscle	BP	1	9	0.155066	0.513944	ENSSSCG00000021355
GO:0045540	regulation of cholesterol biosynthetic process	BP	1	9	0.155066	0.513944	ENSSSCG00000021355
GO:0045779	negative regulation of bone resorption	BP	1	9	0.155066	0.513944	ENSSSCG00000015136
GO:0045836	positive regulation of meiotic nuclear division	BP	1	9	0.155066	0.513944	ENSSSCG00000016533
GO:0048318	axial mesoderm development	BP	1	9	0.155066	0.513944	ENSSSCG00000017239
GO:0051292	nuclear pore complex assembly	BP	1	9	0.155066	0.513944	ENSSSCG00000028464
GO:0061365	positive regulation of triglyceride lipase activity	BP	1	9	0.155066	0.513944	ENSSSCG00000013241
GO:0071397	cellular response to cholesterol	BP	1	9	0.155066	0.513944	ENSSSCG00000000978
GO:0071474	cellular hyperosmotic response	BP	1	9	0.155066	0.513944	ENSSSCG00000033190
GO:0090179	planar cell polarity pathway involved in neural tube closure	BP	1	9	0.155066	0.513944	ENSSSCG00000029838
GO:0090331	negative regulation of platelet aggregation	BP	1	9	0.155066	0.513944	ENSSSCG00000015136
GO:0106118	regulation of sterol biosynthetic process	BP	1	9	0.155066	0.513944	ENSSSCG00000021355
GO:1900194	negative regulation of oocyte maturation	BP	1	9	0.155066	0.513944	ENSSSCG00000016489
GO:1901160	primary amino compound metabolic process	BP	1	9	0.155066	0.513944	ENSSSCG00000022009
GO:1903019	negative regulation of glycoprotein metabolic process	BP	1	9	0.155066	0.513944	ENSSSCG00000011727
GO:1904321	response to forskolin	BP	1	9	0.155066	0.513944	ENSSSCG00000036520
GO:1904322	cellular response to forskolin	BP	1	9	0.155066	0.513944	ENSSSCG00000036520
GO:1904491	protein localization to ciliary transition zone	BP	1	9	0.155066	0.513944	ENSSSCG00000029843
GO:2000392	regulation of lamellipodium morphogenesis	BP	1	9	0.155066	0.513944	ENSSSCG00000005235
GO:0008157	protein phosphatase 1 binding	MF	1	22	0.336067	0.514785	ENSSSCG00000022797
GO:0016638	oxidoreductase activity, acting on the CH-NH2 group of donors	MF	1	22	0.336067	0.514785	ENSSSCG00000005199
GO:0016702	oxidoreductase activity, acting on single donors with incorporation of molecular oxygen, incorporation of two atoms of oxygen	MF	1	22	0.336067	0.514785	ENSSSCG00000038660
GO:0016799	hydrolase activity, hydrolyzing N-glycosyl compounds	MF	1	22	0.336067	0.514785	ENSSSCG00000028359
GO:0048027	mRNA 5'-UTR binding	MF	1	22	0.336067	0.514785	ENSSSCG00000036208
GO:0140102	catalytic activity, acting on a rRNA	MF	1	22	0.336067	0.514785	ENSSSCG00000026812
GO:0140358	P-type transmembrane transporter activity	MF	1	22	0.336067	0.514785	ENSSSCG00000012437
GO:0008186	ATP-dependent activity, acting on RNA	MF	2	65	0.337495	0.515977	ENSSSCG00000005729;ENSSSCG00000024444
GO:0010883	regulation of lipid storage	BP	2	38	0.156318	0.516287	ENSSSCG00000013241;ENSSSCG00000040569
GO:0035567	non-canonical Wnt signaling pathway	BP	2	38	0.156318	0.516287	ENSSSCG00000006051;ENSSSCG00000029838
GO:0098930	axonal transport	BP	2	38	0.156318	0.516287	ENSSSCG00000009649;ENSSSCG00000021355
GO:2000379	positive regulation of reactive oxygen species metabolic process	BP	2	38	0.156318	0.516287	ENSSSCG00000001987;ENSSSCG00000021355
GO:0046879	hormone secretion	BP	6	196	0.157755	0.520108	ENSSSCG00000012885;ENSSSCG00000033190;ENSSSCG00000034114;ENSSSCG00000035893;ENSSSCG00000036520;ENSSSCG00000042162
GO:1902106	negative regulation of leukocyte differentiation	BP	3	74	0.158073	0.520108	ENSSSCG00000015136;ENSSSCG00000034114;ENSSSCG00000040875
GO:1903321	negative regulation of protein modification by small protein conjugation or removal	BP	3	74	0.158073	0.520108	ENSSSCG00000002469;ENSSSCG00000012336;ENSSSCG00000040470
GO:0034101	erythrocyte homeostasis	BP	4	113	0.1583	0.520108	ENSSSCG00000002906;ENSSSCG00000007492;ENSSSCG00000010188;ENSSSCG00000040875
GO:0072175	epithelial tube formation	BP	4	113	0.1583	0.520108	ENSSSCG00000000884;ENSSSCG00000006051;ENSSSCG00000013408;ENSSSCG00000029838
GO:2001235	positive regulation of apoptotic signaling pathway	BP	4	113	0.1583	0.520108	ENSSSCG00000000884;ENSSSCG00000001987;ENSSSCG00000007243;ENSSSCG00000021355
GO:0008201	heparin binding	MF	3	112	0.340977	0.520301	ENSSSCG00000016522;ENSSSCG00000021598;ENSSSCG00000029879
GO:0007015	actin filament organization	BP	10	374	0.158767	0.521191	ENSSSCG00000005235;ENSSSCG00000006957;ENSSSCG00000011246;ENSSSCG00000012392;ENSSSCG00000012517;ENSSSCG00000015632;ENSSSCG00000024088;ENSSSCG00000026108;ENSSSCG00000028695;ENSSSCG00000039769
GO:0007204	positive regulation of cytosolic calcium ion concentration	BP	6	197	0.160364	0.522018	ENSSSCG00000002450;ENSSSCG00000012386;ENSSSCG00000015136;ENSSSCG00000015543;ENSSSCG00000024674;ENSSSCG00000038057
GO:0044419	biological process involved in interspecies interaction between organisms	BP	25	1091	0.160546	0.522018	ENSSSCG00000000985;ENSSSCG00000001987;ENSSSCG00000003801;ENSSSCG00000005152;ENSSSCG00000006141;ENSSSCG00000007384;ENSSSCG00000009140;ENSSSCG00000010334;ENSSSCG00000010772;ENSSSCG00000011727;ENSSSCG00000012409;ENSSSCG00000013241;ENSSSCG00000014310;ENSSSCG00000015540;ENSSSCG00000024914;ENSSSCG00000026592;ENSSSCG00000029879;ENSSSCG00000029990;ENSSSCG00000031075;ENSSSCG00000033190;ENSSSCG00000034792;…
GO:0000302	response to reactive oxygen species	BP	4	114	0.161834	0.522018	ENSSSCG00000001987;ENSSSCG00000010330;ENSSSCG00000021355;ENSSSCG00000033190
GO:0030177	positive regulation of Wnt signaling pathway	BP	4	114	0.161834	0.522018	ENSSSCG00000005235;ENSSSCG00000007456;ENSSSCG00000023162;ENSSSCG00000027928
GO:0090276	regulation of peptide hormone secretion	BP	4	114	0.161834	0.522018	ENSSSCG00000012885;ENSSSCG00000034114;ENSSSCG00000036520;ENSSSCG00000042162
GO:0006892	post-Golgi vesicle-mediated transport	BP	3	75	0.162551	0.522018	ENSSSCG00000000985;ENSSSCG00000030026;ENSSSCG00000040416
GO:0008585	female gonad development	BP	3	75	0.162551	0.522018	ENSSSCG00000007572;ENSSSCG00000011727;ENSSSCG00000021355
GO:0014074	response to purine-containing compound	BP	3	75	0.162551	0.522018	ENSSSCG00000012409;ENSSSCG00000033190;ENSSSCG00000042162
GO:0032504	multicellular organism reproduction	BP	14	562	0.16261	0.522018	ENSSSCG00000000139;ENSSSCG00000002144;ENSSSCG00000004701;ENSSSCG00000007382;ENSSSCG00000011727;ENSSSCG00000016489;ENSSSCG00000016522;ENSSSCG00000016533;ENSSSCG00000016579;ENSSSCG00000016601;ENSSSCG00000017565;ENSSSCG00000021355;ENSSSCG00000029990;ENSSSCG00000039769
GO:0002323	natural killer cell activation involved in immune response	BP	2	39	0.162859	0.522018	ENSSSCG00000005152;ENSSSCG00000031075
GO:0007099	centriole replication	BP	2	39	0.162859	0.522018	ENSSSCG00000000920;ENSSSCG00000032574
GO:0046209	nitric oxide metabolic process	BP	2	39	0.162859	0.522018	ENSSSCG00000010826;ENSSSCG00000011727
GO:0051591	response to cAMP	BP	2	39	0.162859	0.522018	ENSSSCG00000012409;ENSSSCG00000033190
GO:0002831	regulation of response to biotic stimulus	BP	7	242	0.164139	0.522018	ENSSSCG00000003801;ENSSSCG00000009140;ENSSSCG00000010772;ENSSSCG00000015540;ENSSSCG00000029879;ENSSSCG00000034792;ENSSSCG00000035170
GO:0048872	homeostasis of number of cells	BP	7	242	0.164139	0.522018	ENSSSCG00000001987;ENSSSCG00000002906;ENSSSCG00000007492;ENSSSCG00000010188;ENSSSCG00000021355;ENSSSCG00000021728;ENSSSCG00000040875
GO:0098656	anion transmembrane transport	BP	7	242	0.164139	0.522018	ENSSSCG00000006932;ENSSSCG00000015949;ENSSSCG00000017208;ENSSSCG00000024018;ENSSSCG00000027118;ENSSSCG00000035893;ENSSSCG00000038275
GO:0031099	regeneration	BP	3	76	0.167066	0.522018	ENSSSCG00000007456;ENSSSCG00000009649;ENSSSCG00000016522
GO:0007423	sensory organ development	BP	12	471	0.167112	0.522018	ENSSSCG00000000139;ENSSSCG00000000385;ENSSSCG00000006051;ENSSSCG00000008745;ENSSSCG00000012885;ENSSSCG00000014310;ENSSSCG00000017239;ENSSSCG00000021355;ENSSSCG00000025578;ENSSSCG00000029838;ENSSSCG00000029843;ENSSSCG00000033190
GO:0016358	dendrite development	BP	5	157	0.167555	0.522018	ENSSSCG00000003146;ENSSSCG00000009860;ENSSSCG00000016522;ENSSSCG00000035074;ENSSSCG00000040416
GO:0043393	regulation of protein binding	BP	5	157	0.167555	0.522018	ENSSSCG00000006051;ENSSSCG00000007572;ENSSSCG00000012336;ENSSSCG00000015136;ENSSSCG00000040875
GO:0002791	regulation of peptide secretion	BP	4	116	0.168987	0.522018	ENSSSCG00000012885;ENSSSCG00000034114;ENSSSCG00000036520;ENSSSCG00000042162
GO:0060402	calcium ion transport into cytosol	BP	4	116	0.168987	0.522018	ENSSSCG00000002450;ENSSSCG00000012386;ENSSSCG00000015136;ENSSSCG00000015543
GO:0001825	blastocyst formation	BP	2	40	0.169447	0.522018	ENSSSCG00000002144;ENSSSCG00000026472
GO:0043470	regulation of carbohydrate catabolic process	BP	2	40	0.169447	0.522018	ENSSSCG00000011169;ENSSSCG00000022797
GO:0048278	vesicle docking	BP	2	40	0.169447	0.522018	ENSSSCG00000000985;ENSSSCG00000021238
GO:0098534	centriole assembly	BP	2	40	0.169447	0.522018	ENSSSCG00000000920;ENSSSCG00000032574
GO:2001057	reactive nitrogen species metabolic process	BP	2	40	0.169447	0.522018	ENSSSCG00000010826;ENSSSCG00000011727
GO:0006875	cellular metal ion homeostasis	BP	11	426	0.169756	0.522018	ENSSSCG00000000135;ENSSSCG00000000385;ENSSSCG00000002450;ENSSSCG00000009524;ENSSSCG00000012386;ENSSSCG00000012437;ENSSSCG00000015136;ENSSSCG00000015543;ENSSSCG00000021355;ENSSSCG00000024674;ENSSSCG00000038057
GO:0030029	actin filament-based process	BP	16	662	0.170035	0.522018	ENSSSCG00000005235;ENSSSCG00000006957;ENSSSCG00000011246;ENSSSCG00000012392;ENSSSCG00000012517;ENSSSCG00000015632;ENSSSCG00000020963;ENSSSCG00000024088;ENSSSCG00000026108;ENSSSCG00000028359;ENSSSCG00000028695;ENSSSCG00000029323;ENSSSCG00000033190;ENSSSCG00000036520;ENSSSCG00000037142;ENSSSCG00000039769
GO:0043068	positive regulation of programmed cell death	BP	10	380	0.170075	0.522018	ENSSSCG00000000884;ENSSSCG00000001987;ENSSSCG00000002921;ENSSSCG00000007243;ENSSSCG00000009140;ENSSSCG00000010772;ENSSSCG00000016793;ENSSSCG00000021355;ENSSSCG00000021728;ENSSSCG00000025578
GO:0042445	hormone metabolic process	BP	5	158	0.170605	0.522018	ENSSSCG00000000046;ENSSSCG00000009225;ENSSSCG00000015930;ENSSSCG00000025578;ENSSSCG00000040416
GO:0000012	single strand break repair	BP	1	10	0.170742	0.522018	ENSSSCG00000009540
GO:0000255	allantoin metabolic process	BP	1	10	0.170742	0.522018	ENSSSCG00000028210
GO:0002675	positive regulation of acute inflammatory response	BP	1	10	0.170742	0.522018	ENSSSCG00000010772
GO:0002775	antimicrobial peptide production	BP	1	10	0.170742	0.522018	ENSSSCG00000034792
GO:0002836	positive regulation of response to tumor cell	BP	1	10	0.170742	0.522018	ENSSSCG00000015540
GO:0002839	positive regulation of immune response to tumor cell	BP	1	10	0.170742	0.522018	ENSSSCG00000015540
GO:0003183	mitral valve morphogenesis	BP	1	10	0.170742	0.522018	ENSSSCG00000040875
GO:0003188	heart valve formation	BP	1	10	0.170742	0.522018	ENSSSCG00000040875
GO:0006244	pyrimidine nucleotide catabolic process	BP	1	10	0.170742	0.522018	ENSSSCG00000028210
GO:0006563	L-serine metabolic process	BP	1	10	0.170742	0.522018	ENSSSCG00000036208
GO:0006878	cellular copper ion homeostasis	BP	1	10	0.170742	0.522018	ENSSSCG00000012437
GO:0007042	lysosomal lumen acidification	BP	1	10	0.170742	0.522018	ENSSSCG00000027928
GO:0010867	positive regulation of triglyceride biosynthetic process	BP	1	10	0.170742	0.522018	ENSSSCG00000013241
GO:0015697	quaternary ammonium group transport	BP	1	10	0.170742	0.522018	ENSSSCG00000017208
GO:0015791	polyol transport	BP	1	10	0.170742	0.522018	ENSSSCG00000033190
GO:0016045	detection of bacterium	BP	1	10	0.170742	0.522018	ENSSSCG00000026592
GO:0019370	leukotriene biosynthetic process	BP	1	10	0.170742	0.522018	ENSSSCG00000031736
GO:0021670	lateral ventricle development	BP	1	10	0.170742	0.522018	ENSSSCG00000033190
GO:0031272	regulation of pseudopodium assembly	BP	1	10	0.170742	0.522018	ENSSSCG00000026108
GO:0031274	positive regulation of pseudopodium assembly	BP	1	10	0.170742	0.522018	ENSSSCG00000026108
GO:0032305	positive regulation of icosanoid secretion	BP	1	10	0.170742	0.522018	ENSSSCG00000040569
GO:0032310	prostaglandin secretion	BP	1	10	0.170742	0.522018	ENSSSCG00000040569
GO:0032836	glomerular basement membrane development	BP	1	10	0.170742	0.522018	ENSSSCG00000007456
GO:0033629	negative regulation of cell adhesion mediated by integrin	BP	1	10	0.170742	0.522018	ENSSSCG00000034213
GO:0034111	negative regulation of homotypic cell-cell adhesion	BP	1	10	0.170742	0.522018	ENSSSCG00000015136
GO:0034374	low-density lipoprotein particle remodeling	BP	1	10	0.170742	0.522018	ENSSSCG00000040569
GO:0035524	proline transmembrane transport	BP	1	10	0.170742	0.522018	ENSSSCG00000035893
GO:0035871	protein K11-linked deubiquitination	BP	1	10	0.170742	0.522018	ENSSSCG00000002469
GO:0042048	olfactory behavior	BP	1	10	0.170742	0.522018	ENSSSCG00000040416
GO:0042541	hemoglobin biosynthetic process	BP	1	10	0.170742	0.522018	ENSSSCG00000010188
GO:0043201	response to leucine	BP	1	10	0.170742	0.522018	ENSSSCG00000014411
GO:0045117	azole transmembrane transport	BP	1	10	0.170742	0.522018	ENSSSCG00000017208
GO:0045603	positive regulation of endothelial cell differentiation	BP	1	10	0.170742	0.522018	ENSSSCG00000002906
GO:0050665	hydrogen peroxide biosynthetic process	BP	1	10	0.170742	0.522018	ENSSSCG00000021355
GO:0051954	positive regulation of amine transport	BP	1	10	0.170742	0.522018	ENSSSCG00000035893
GO:0060457	negative regulation of digestive system process	BP	1	10	0.170742	0.522018	ENSSSCG00000013241
GO:0061299	retina vasculature morphogenesis in camera-type eye	BP	1	10	0.170742	0.522018	ENSSSCG00000012885
GO:0070189	kynurenine metabolic process	BP	1	10	0.170742	0.522018	ENSSSCG00000033636
GO:0070778	L-aspartate transmembrane transport	BP	1	10	0.170742	0.522018	ENSSSCG00000015949
GO:0071233	cellular response to leucine	BP	1	10	0.170742	0.522018	ENSSSCG00000014411
GO:0071371	cellular response to gonadotropin stimulus	BP	1	10	0.170742	0.522018	ENSSSCG00000036520
GO:0071472	cellular response to salt stress	BP	1	10	0.170742	0.522018	ENSSSCG00000033190
GO:0071635	negative regulation of transforming growth factor beta production	BP	1	10	0.170742	0.522018	ENSSSCG00000023162
GO:0072160	nephron tubule epithelial cell differentiation	BP	1	10	0.170742	0.522018	ENSSSCG00000008745
GO:0072182	regulation of nephron tubule epithelial cell differentiation	BP	1	10	0.170742	0.522018	ENSSSCG00000008745
GO:0072224	metanephric glomerulus development	BP	1	10	0.170742	0.522018	ENSSSCG00000033190
GO:0072672	neutrophil extravasation	BP	1	10	0.170742	0.522018	ENSSSCG00000010772
GO:0090178	regulation of establishment of planar polarity involved in neural tube closure	BP	1	10	0.170742	0.522018	ENSSSCG00000029838
GO:0097084	vascular associated smooth muscle cell development	BP	1	10	0.170742	0.522018	ENSSSCG00000013408
GO:1900044	regulation of protein K63-linked ubiquitination	BP	1	10	0.170742	0.522018	ENSSSCG00000002469
GO:1900221	regulation of amyloid-beta clearance	BP	1	10	0.170742	0.522018	ENSSSCG00000014080
GO:1900426	positive regulation of defense response to bacterium	BP	1	10	0.170742	0.522018	ENSSSCG00000034792
GO:1901857	positive regulation of cellular respiration	BP	1	10	0.170742	0.522018	ENSSSCG00000041289
GO:1903909	regulation of receptor clustering	BP	1	10	0.170742	0.522018	ENSSSCG00000013248
GO:0046486	glycerolipid metabolic process	BP	9	335	0.171577	0.523006	ENSSSCG00000001078;ENSSSCG00000008233;ENSSSCG00000012315;ENSSSCG00000013241;ENSSSCG00000028010;ENSSSCG00000029291;ENSSSCG00000032481;ENSSSCG00000038329;ENSSSCG00000040569
GO:0042273	ribosomal large subunit biogenesis	BP	3	77	0.171618	0.523006	ENSSSCG00000016793;ENSSSCG00000017239;ENSSSCG00000026472
GO:0070167	regulation of biomineral tissue development	BP	3	77	0.171618	0.523006	ENSSSCG00000008072;ENSSSCG00000009220;ENSSSCG00000016522
GO:1903707	negative regulation of hemopoiesis	BP	3	77	0.171618	0.523006	ENSSSCG00000015136;ENSSSCG00000034114;ENSSSCG00000040875
GO:0009888	tissue development	BP	33	1499	0.17197	0.523171	ENSSSCG00000000884;ENSSSCG00000002906;ENSSSCG00000003146;ENSSSCG00000005380;ENSSSCG00000006051;ENSSSCG00000007079;ENSSSCG00000007456;ENSSSCG00000007572;ENSSSCG00000008072;ENSSSCG00000008081;ENSSSCG00000008745;ENSSSCG00000009140;ENSSSCG00000009220;ENSSSCG00000009860;ENSSSCG00000012409;ENSSSCG00000012885;ENSSSCG00000012960;ENSSSCG00000013248;ENSSSCG00000013408;ENSSSCG00000015828;ENSSSCG00000016522;…
GO:0009132	nucleoside diphosphate metabolic process	BP	4	117	0.172605	0.523171	ENSSSCG00000002504;ENSSSCG00000005627;ENSSSCG00000011169;ENSSSCG00000034213
GO:0055076	transition metal ion homeostasis	BP	4	117	0.172605	0.523171	ENSSSCG00000000385;ENSSSCG00000012437;ENSSSCG00000021355;ENSSSCG00000029304
GO:0090087	regulation of peptide transport	BP	4	117	0.172605	0.523171	ENSSSCG00000012885;ENSSSCG00000034114;ENSSSCG00000036520;ENSSSCG00000042162
GO:0090090	negative regulation of canonical Wnt signaling pathway	BP	4	117	0.172605	0.523171	ENSSSCG00000006051;ENSSSCG00000013248;ENSSSCG00000028995;ENSSSCG00000029843
GO:0032269	negative regulation of cellular protein metabolic process	BP	18	760	0.17264	0.523171	ENSSSCG00000002469;ENSSSCG00000002479;ENSSSCG00000007384;ENSSSCG00000011363;ENSSSCG00000012336;ENSSSCG00000012885;ENSSSCG00000012960;ENSSSCG00000013241;ENSSSCG00000014080;ENSSSCG00000015136;ENSSSCG00000016489;ENSSSCG00000028871;ENSSSCG00000029879;ENSSSCG00000032423;ENSSSCG00000033190;ENSSSCG00000033586;ENSSSCG00000036208;ENSSSCG00000040470
GO:0048534	hematopoietic or lymphoid organ development	BP	18	760	0.17264	0.523171	ENSSSCG00000001987;ENSSSCG00000002906;ENSSSCG00000005152;ENSSSCG00000005594;ENSSSCG00000007492;ENSSSCG00000007572;ENSSSCG00000008002;ENSSSCG00000008081;ENSSSCG00000009540;ENSSSCG00000010188;ENSSSCG00000010772;ENSSSCG00000012885;ENSSSCG00000015136;ENSSSCG00000015540;ENSSSCG00000016522;ENSSSCG00000031075;ENSSSCG00000034114;ENSSSCG00000040875
GO:0010720	positive regulation of cell development	BP	6	202	0.173685	0.525919	ENSSSCG00000009540;ENSSSCG00000009649;ENSSSCG00000009860;ENSSSCG00000016522;ENSSSCG00000034114;ENSSSCG00000036520
GO:0005227	calcium activated cation channel activity	MF	1	23	0.348321	0.526455	ENSSSCG00000004701
GO:0015026	coreceptor activity	MF	1	23	0.348321	0.526455	ENSSSCG00000012885
GO:0016701	oxidoreductase activity, acting on single donors with incorporation of molecular oxygen	MF	1	23	0.348321	0.526455	ENSSSCG00000038660
GO:0043325	phosphatidylinositol-3,4-bisphosphate binding	MF	1	23	0.348321	0.526455	ENSSSCG00000024088
GO:0050699	WW domain binding	MF	1	23	0.348321	0.526455	ENSSSCG00000012530
GO:0015399	primary active transmembrane transporter activity	MF	4	162	0.349598	0.527382	ENSSSCG00000010188;ENSSSCG00000012437;ENSSSCG00000017256;ENSSSCG00000038275
GO:0006509	membrane protein ectodomain proteolysis	BP	2	41	0.17608	0.5289	ENSSSCG00000010772;ENSSSCG00000012074
GO:0042461	photoreceptor cell development	BP	2	41	0.17608	0.5289	ENSSSCG00000029843;ENSSSCG00000040416
GO:0042698	ovulation cycle	BP	2	41	0.17608	0.5289	ENSSSCG00000011727;ENSSSCG00000016522
GO:0043113	receptor clustering	BP	2	41	0.17608	0.5289	ENSSSCG00000013248;ENSSSCG00000016522
GO:0048146	positive regulation of fibroblast proliferation	BP	2	41	0.17608	0.5289	ENSSSCG00000009540;ENSSSCG00000033190
GO:0071715	icosanoid transport	BP	2	41	0.17608	0.5289	ENSSSCG00000011641;ENSSSCG00000040569
GO:0009123	nucleoside monophosphate metabolic process	BP	3	78	0.176205	0.5289	ENSSSCG00000002504;ENSSSCG00000005627;ENSSSCG00000028210
GO:0046545	development of primary female sexual characteristics	BP	3	78	0.176205	0.5289	ENSSSCG00000007572;ENSSSCG00000011727;ENSSSCG00000021355
GO:1904659	glucose transmembrane transport	BP	3	78	0.176205	0.5289	ENSSSCG00000002921;ENSSSCG00000023915;ENSSSCG00000024058
GO:0072001	renal system development	BP	7	247	0.176223	0.5289	ENSSSCG00000000139;ENSSSCG00000007456;ENSSSCG00000008745;ENSSSCG00000013248;ENSSSCG00000025578;ENSSSCG00000031423;ENSSSCG00000033190
GO:0045637	regulation of myeloid cell differentiation	BP	5	160	0.176769	0.5289	ENSSSCG00000007492;ENSSSCG00000010188;ENSSSCG00000015136;ENSSSCG00000034114;ENSSSCG00000040875
GO:0045087	innate immune response	BP	12	477	0.177446	0.5289	ENSSSCG00000003801;ENSSSCG00000007384;ENSSSCG00000009140;ENSSSCG00000010772;ENSSSCG00000011727;ENSSSCG00000012409;ENSSSCG00000024914;ENSSSCG00000026592;ENSSSCG00000029879;ENSSSCG00000029990;ENSSSCG00000035170;ENSSSCG00000036007
GO:0072503	cellular divalent inorganic cation homeostasis	BP	9	338	0.177801	0.5289	ENSSSCG00000000135;ENSSSCG00000000385;ENSSSCG00000002450;ENSSSCG00000009524;ENSSSCG00000012386;ENSSSCG00000015136;ENSSSCG00000015543;ENSSSCG00000024674;ENSSSCG00000038057
GO:0050778	positive regulation of immune response	BP	10	384	0.177823	0.5289	ENSSSCG00000001917;ENSSSCG00000003801;ENSSSCG00000009140;ENSSSCG00000010772;ENSSSCG00000015540;ENSSSCG00000024791;ENSSSCG00000024914;ENSSSCG00000034792;ENSSSCG00000035170;ENSSSCG00000036007
GO:0051345	positive regulation of hydrolase activity	BP	11	431	0.178893	0.5289	ENSSSCG00000000884;ENSSSCG00000001987;ENSSSCG00000001989;ENSSSCG00000004065;ENSSSCG00000010840;ENSSSCG00000013241;ENSSSCG00000014411;ENSSSCG00000023788;ENSSSCG00000024674;ENSSSCG00000034213;ENSSSCG00000036465
GO:0009914	hormone transport	BP	6	204	0.179138	0.5289	ENSSSCG00000012885;ENSSSCG00000033190;ENSSSCG00000034114;ENSSSCG00000035893;ENSSSCG00000036520;ENSSSCG00000042162
GO:0043085	positive regulation of catalytic activity	BP	20	862	0.179172	0.5289	ENSSSCG00000000884;ENSSSCG00000001987;ENSSSCG00000001989;ENSSSCG00000004065;ENSSSCG00000010772;ENSSSCG00000010840;ENSSSCG00000012437;ENSSSCG00000013241;ENSSSCG00000014411;ENSSSCG00000016793;ENSSSCG00000017254;ENSSSCG00000021355;ENSSSCG00000023162;ENSSSCG00000023788;ENSSSCG00000024674;ENSSSCG00000025260;ENSSSCG00000029879;ENSSSCG00000034213;ENSSSCG00000036387;ENSSSCG00000036465
GO:0048839	inner ear development	BP	5	161	0.179883	0.5289	ENSSSCG00000000139;ENSSSCG00000006051;ENSSSCG00000014310;ENSSSCG00000021355;ENSSSCG00000029838
GO:0010970	transport along microtubule	BP	4	119	0.179921	0.5289	ENSSSCG00000000139;ENSSSCG00000002921;ENSSSCG00000009649;ENSSSCG00000021355
GO:0008645	hexose transmembrane transport	BP	3	79	0.180825	0.5289	ENSSSCG00000002921;ENSSSCG00000023915;ENSSSCG00000024058
GO:0043648	dicarboxylic acid metabolic process	BP	3	79	0.180825	0.5289	ENSSSCG00000036208;ENSSSCG00000038660;ENSSSCG00000039244
GO:0110149	regulation of biomineralization	BP	3	79	0.180825	0.5289	ENSSSCG00000008072;ENSSSCG00000009220;ENSSSCG00000016522
GO:0051248	negative regulation of protein metabolic process	BP	19	815	0.181462	0.5289	ENSSSCG00000002469;ENSSSCG00000002479;ENSSSCG00000007384;ENSSSCG00000011363;ENSSSCG00000011727;ENSSSCG00000012336;ENSSSCG00000012885;ENSSSCG00000012960;ENSSSCG00000013241;ENSSSCG00000014080;ENSSSCG00000015136;ENSSSCG00000016489;ENSSSCG00000028871;ENSSSCG00000029879;ENSSSCG00000032423;ENSSSCG00000033190;ENSSSCG00000033586;ENSSSCG00000036208;ENSSSCG00000040470
GO:0001836	release of cytochrome c from mitochondria	BP	2	42	0.182753	0.5289	ENSSSCG00000001989;ENSSSCG00000010330
GO:0009066	aspartate family amino acid metabolic process	BP	2	42	0.182753	0.5289	ENSSSCG00000013065;ENSSSCG00000029945
GO:0032008	positive regulation of TOR signaling	BP	2	42	0.182753	0.5289	ENSSSCG00000002714;ENSSSCG00000014411
GO:0051180	vitamin transport	BP	2	42	0.182753	0.5289	ENSSSCG00000017208;ENSSSCG00000027118
GO:0052372	modulation by symbiont of entry into host	BP	2	42	0.182753	0.5289	ENSSSCG00000000985;ENSSSCG00000011727
GO:1901564	organonitrogen compound metabolic process	BP	113	5665	0.184563	0.5289	ENSSSCG00000000046;ENSSSCG00000000135;ENSSSCG00000000884;ENSSSCG00000001078;ENSSSCG00000001423;ENSSSCG00000001987;ENSSSCG00000001989;ENSSSCG00000002144;ENSSSCG00000002469;ENSSSCG00000002479;ENSSSCG00000002921;ENSSSCG00000002967;ENSSSCG00000003913;ENSSSCG00000004233;ENSSSCG00000004364;ENSSSCG00000004869;ENSSSCG00000005152;ENSSSCG00000005199;ENSSSCG00000005627;ENSSSCG00000006932;ENSSSCG00000007384;…
GO:0007162	negative regulation of cell adhesion	BP	6	206	0.18466	0.5289	ENSSSCG00000005235;ENSSSCG00000015136;ENSSSCG00000032423;ENSSSCG00000034213;ENSSSCG00000035170;ENSSSCG00000036520
GO:0045597	positive regulation of cell differentiation	BP	15	624	0.184895	0.5289	ENSSSCG00000002906;ENSSSCG00000006051;ENSSSCG00000007492;ENSSSCG00000008745;ENSSSCG00000009540;ENSSSCG00000009649;ENSSSCG00000009860;ENSSSCG00000010188;ENSSSCG00000010772;ENSSSCG00000012885;ENSSSCG00000013408;ENSSSCG00000016522;ENSSSCG00000029879;ENSSSCG00000034114;ENSSSCG00000036520
GO:0051224	negative regulation of protein transport	BP	3	80	0.185479	0.5289	ENSSSCG00000013241;ENSSSCG00000014080;ENSSSCG00000042162
GO:1901890	positive regulation of cell junction assembly	BP	3	80	0.185479	0.5289	ENSSSCG00000007079;ENSSSCG00000029843;ENSSSCG00000036520
GO:0001547	antral ovarian follicle growth	BP	1	11	0.186128	0.5289	ENSSSCG00000011727
GO:0001867	complement activation, lectin pathway	BP	1	11	0.186128	0.5289	ENSSSCG00000036007
GO:0001886	endothelial cell morphogenesis	BP	1	11	0.186128	0.5289	ENSSSCG00000005380
GO:0002475	antigen processing and presentation via MHC class Ib	BP	1	11	0.186128	0.5289	ENSSSCG00000001396
GO:0002759	regulation of antimicrobial humoral response	BP	1	11	0.186128	0.5289	ENSSSCG00000034792
GO:0003174	mitral valve development	BP	1	11	0.186128	0.5289	ENSSSCG00000040875
GO:0006103	2-oxoglutarate metabolic process	BP	1	11	0.186128	0.5289	ENSSSCG00000039244
GO:0006266	DNA ligation	BP	1	11	0.186128	0.5289	ENSSSCG00000009540
GO:0006309	apoptotic DNA fragmentation	BP	1	11	0.186128	0.5289	ENSSSCG00000000884
GO:0006566	threonine metabolic process	BP	1	11	0.186128	0.5289	ENSSSCG00000029945
GO:0007501	mesodermal cell fate specification	BP	1	11	0.186128	0.5289	ENSSSCG00000002906
GO:0009128	purine nucleoside monophosphate catabolic process	BP	1	11	0.186128	0.5289	ENSSSCG00000028210
GO:0009133	nucleoside diphosphate biosynthetic process	BP	1	11	0.186128	0.5289	ENSSSCG00000005627
GO:0009143	nucleoside triphosphate catabolic process	BP	1	11	0.186128	0.5289	ENSSSCG00000004233
GO:0009155	purine deoxyribonucleotide catabolic process	BP	1	11	0.186128	0.5289	ENSSSCG00000028210
GO:0009169	purine ribonucleoside monophosphate catabolic process	BP	1	11	0.186128	0.5289	ENSSSCG00000028210
GO:0009170	purine deoxyribonucleoside monophosphate metabolic process	BP	1	11	0.186128	0.5289	ENSSSCG00000028210
GO:0009313	oligosaccharide catabolic process	BP	1	11	0.186128	0.5289	ENSSSCG00000021638
GO:0015824	proline transport	BP	1	11	0.186128	0.5289	ENSSSCG00000035893
GO:0019184	nonribosomal peptide biosynthetic process	BP	1	11	0.186128	0.5289	ENSSSCG00000031736
GO:0031269	pseudopodium assembly	BP	1	11	0.186128	0.5289	ENSSSCG00000026108
GO:0032303	regulation of icosanoid secretion	BP	1	11	0.186128	0.5289	ENSSSCG00000040569
GO:0032402	melanosome transport	BP	1	11	0.186128	0.5289	ENSSSCG00000023162
GO:0034698	response to gonadotropin	BP	1	11	0.186128	0.5289	ENSSSCG00000036520
GO:0035845	photoreceptor cell outer segment organization	BP	1	11	0.186128	0.5289	ENSSSCG00000029843
GO:0036065	fucosylation	BP	1	11	0.186128	0.5289	ENSSSCG00000040556
GO:0036151	phosphatidylcholine acyl-chain remodeling	BP	1	11	0.186128	0.5289	ENSSSCG00000013241
GO:0038063	collagen-activated tyrosine kinase receptor signaling pathway	BP	1	11	0.186128	0.5289	ENSSSCG00000015136
GO:0045821	positive regulation of glycolytic process	BP	1	11	0.186128	0.5289	ENSSSCG00000011169
GO:0046851	negative regulation of bone remodeling	BP	1	11	0.186128	0.5289	ENSSSCG00000015136
GO:0047484	regulation of response to osmotic stress	BP	1	11	0.186128	0.5289	ENSSSCG00000000978
GO:0050872	white fat cell differentiation	BP	1	11	0.186128	0.5289	ENSSSCG00000016792
GO:0051791	medium-chain fatty acid metabolic process	BP	1	11	0.186128	0.5289	ENSSSCG00000028010
GO:0051955	regulation of amino acid transport	BP	1	11	0.186128	0.5289	ENSSSCG00000035893
GO:0055070	copper ion homeostasis	BP	1	11	0.186128	0.5289	ENSSSCG00000012437
GO:0060670	branching involved in labyrinthine layer morphogenesis	BP	1	11	0.186128	0.5289	ENSSSCG00000013408
GO:0070234	positive regulation of T cell apoptotic process	BP	1	11	0.186128	0.5289	ENSSSCG00000010772
GO:0071280	cellular response to copper ion	BP	1	11	0.186128	0.5289	ENSSSCG00000033190
GO:0072070	loop of Henle development	BP	1	11	0.186128	0.5289	ENSSSCG00000033190
GO:0072683	T cell extravasation	BP	1	11	0.186128	0.5289	ENSSSCG00000001987
GO:0098543	detection of other organism	BP	1	11	0.186128	0.5289	ENSSSCG00000026592
GO:0098789	pre-mRNA cleavage required for polyadenylation	BP	1	11	0.186128	0.5289	ENSSSCG00000040611
GO:0098915	membrane repolarization during ventricular cardiac muscle cell action potential	BP	1	11	0.186128	0.5289	ENSSSCG00000029323
GO:1901660	calcium ion export	BP	1	11	0.186128	0.5289	ENSSSCG00000002450
GO:1902931	negative regulation of alcohol biosynthetic process	BP	1	11	0.186128	0.5289	ENSSSCG00000021355
GO:1903209	positive regulation of oxidative stress-induced cell death	BP	1	11	0.186128	0.5289	ENSSSCG00000021355
GO:1903430	negative regulation of cell maturation	BP	1	11	0.186128	0.5289	ENSSSCG00000016489
GO:2000672	negative regulation of motor neuron apoptotic process	BP	1	11	0.186128	0.5289	ENSSSCG00000009649
GO:2001212	regulation of vasculogenesis	BP	1	11	0.186128	0.5289	ENSSSCG00000013408
GO:0008092	cytoskeletal protein binding	MF	17	824	0.351288	0.528929	ENSSSCG00000002921;ENSSSCG00000003913;ENSSSCG00000008745;ENSSSCG00000011246;ENSSSCG00000012517;ENSSSCG00000014214;ENSSSCG00000015632;ENSSSCG00000018007;ENSSSCG00000022131;ENSSSCG00000024088;ENSSSCG00000028695;ENSSSCG00000032297;ENSSSCG00000035534;ENSSSCG00000038679;ENSSSCG00000039769;ENSSSCG00000039977;ENSSSCG00000042162
GO:0005794	Golgi apparatus	CC	26	1111	0.120177	0.530183	ENSSSCG00000000139;ENSSSCG00000002921;ENSSSCG00000004364;ENSSSCG00000005729;ENSSSCG00000006762;ENSSSCG00000007456;ENSSSCG00000007572;ENSSSCG00000009860;ENSSSCG00000009963;ENSSSCG00000012074;ENSSSCG00000012437;ENSSSCG00000013113;ENSSSCG00000014874;ENSSSCG00000016682;ENSSSCG00000016792;ENSSSCG00000016793;ENSSSCG00000017256;ENSSSCG00000017926;ENSSSCG00000023915;ENSSSCG00000024232;ENSSSCG00000028755;…
GO:0005952	cAMP-dependent protein kinase complex	CC	1	7	0.121519	0.530183	ENSSSCG00000011363
GO:0032593	insulin-responsive compartment	CC	1	7	0.121519	0.530183	ENSSSCG00000023915
GO:0070419	nonhomologous end joining complex	CC	1	7	0.121519	0.530183	ENSSSCG00000009540
GO:0099571	postsynaptic cytoskeleton	CC	1	7	0.121519	0.530183	ENSSSCG00000009649
GO:0030141	secretory granule	CC	7	226	0.122945	0.530183	ENSSSCG00000010772;ENSSSCG00000014214;ENSSSCG00000016579;ENSSSCG00000016601;ENSSSCG00000023915;ENSSSCG00000029879;ENSSSCG00000034792
GO:0005777	peroxisome	CC	4	104	0.124175	0.530183	ENSSSCG00000012490;ENSSSCG00000014080;ENSSSCG00000021355;ENSSSCG00000039244
GO:0042579	microbody	CC	4	104	0.124175	0.530183	ENSSSCG00000012490;ENSSSCG00000014080;ENSSSCG00000021355;ENSSSCG00000039244
GO:0015934	large ribosomal subunit	CC	5	144	0.125709	0.530183	ENSSSCG00000012879;ENSSSCG00000017239;ENSSSCG00000026472;ENSSSCG00000030578;ENSSSCG00000041512
GO:0031514	motile cilium	CC	6	186	0.127835	0.530183	ENSSSCG00000000139;ENSSSCG00000005627;ENSSSCG00000012125;ENSSSCG00000023918;ENSSSCG00000029990;ENSSSCG00000040416
GO:0005903	brush border	CC	3	69	0.133058	0.530183	ENSSSCG00000010960;ENSSSCG00000033190;ENSSSCG00000035893
GO:0005789	endoplasmic reticulum membrane	CC	16	643	0.134687	0.530183	ENSSSCG00000000046;ENSSSCG00000001396;ENSSSCG00000012490;ENSSSCG00000014080;ENSSSCG00000015268;ENSSSCG00000015540;ENSSSCG00000015930;ENSSSCG00000016792;ENSSSCG00000026360;ENSSSCG00000028464;ENSSSCG00000029291;ENSSSCG00000031692;ENSSSCG00000031736;ENSSSCG00000032481;ENSSSCG00000038275;ENSSSCG00000038329
GO:0000506	glycosylphosphatidylinositol-N-acetylglucosaminyltransferase (GPI-GnT) complex	CC	1	8	0.137632	0.530183	ENSSSCG00000032481
GO:0001931	uropod	CC	1	8	0.137632	0.530183	ENSSSCG00000028359
GO:0008303	caspase complex	CC	1	8	0.137632	0.530183	ENSSSCG00000038329
GO:0031254	cell trailing edge	CC	1	8	0.137632	0.530183	ENSSSCG00000028359
GO:0034464	BBSome	CC	1	8	0.137632	0.530183	ENSSSCG00000040416
GO:0042622	photoreceptor outer segment membrane	CC	1	8	0.137632	0.530183	ENSSSCG00000008745
GO:0044292	dendrite terminus	CC	1	8	0.137632	0.530183	ENSSSCG00000015632
GO:0099569	presynaptic cytoskeleton	CC	1	8	0.137632	0.530183	ENSSSCG00000009649
GO:0120199	cone photoreceptor outer segment	CC	1	8	0.137632	0.530183	ENSSSCG00000002450
GO:0008047	enzyme activator activity	MF	2	68	0.357614	0.535474	ENSSSCG00000031736;ENSSSCG00000032481
GO:0005104	fibroblast growth factor receptor binding	MF	1	24	0.360351	0.535474	ENSSSCG00000007079
GO:0015101	organic cation transmembrane transporter activity	MF	1	24	0.360351	0.535474	ENSSSCG00000017208
GO:0017080	sodium channel regulator activity	MF	1	24	0.360351	0.535474	ENSSSCG00000007760
GO:0031681	G-protein beta-subunit binding	MF	1	24	0.360351	0.535474	ENSSSCG00000010840
GO:0043028	cysteine-type endopeptidase regulator activity involved in apoptotic process	MF	1	24	0.360351	0.535474	ENSSSCG00000000884
GO:0080025	phosphatidylinositol-3,5-bisphosphate binding	MF	1	24	0.360351	0.535474	ENSSSCG00000024088
GO:0034198	cellular response to amino acid starvation	BP	2	43	0.189462	0.537165	ENSSSCG00000002714;ENSSSCG00000014411
GO:0044070	regulation of anion transport	BP	2	43	0.189462	0.537165	ENSSSCG00000035893;ENSSSCG00000040569
GO:0045668	negative regulation of osteoblast differentiation	BP	2	43	0.189462	0.537165	ENSSSCG00000012409;ENSSSCG00000012885
GO:0032886	regulation of microtubule-based process	BP	6	208	0.190248	0.538988	ENSSSCG00000002921;ENSSSCG00000014214;ENSSSCG00000029990;ENSSSCG00000036520;ENSSSCG00000038057;ENSSSCG00000040416
GO:0050839	cell adhesion molecule binding	MF	5	215	0.363815	0.539613	ENSSSCG00000008745;ENSSSCG00000010772;ENSSSCG00000012121;ENSSSCG00000016522;ENSSSCG00000016900
GO:0042157	lipoprotein metabolic process	BP	4	122	0.191084	0.540952	ENSSSCG00000002921;ENSSSCG00000029291;ENSSSCG00000032481;ENSSSCG00000038329
GO:0070062	extracellular exosome	CC	3	72	0.145745	0.541092	ENSSSCG00000008745;ENSSSCG00000023915;ENSSSCG00000033190
GO:0030119	AP-type membrane coat adaptor complex	CC	2	37	0.147171	0.541092	ENSSSCG00000006762;ENSSSCG00000012978
GO:0098827	endoplasmic reticulum subcompartment	CC	16	654	0.148874	0.541092	ENSSSCG00000000046;ENSSSCG00000001396;ENSSSCG00000012490;ENSSSCG00000014080;ENSSSCG00000015268;ENSSSCG00000015540;ENSSSCG00000015930;ENSSSCG00000016792;ENSSSCG00000026360;ENSSSCG00000028464;ENSSSCG00000029291;ENSSSCG00000031692;ENSSSCG00000031736;ENSSSCG00000032481;ENSSSCG00000038275;ENSSSCG00000038329
GO:0042599	lamellar body	CC	1	9	0.153451	0.541092	ENSSSCG00000034792
GO:0043194	axon initial segment	CC	1	9	0.153451	0.541092	ENSSSCG00000010915
GO:0097197	tetraspanin-enriched microdomain	CC	1	9	0.153451	0.541092	ENSSSCG00000016570
GO:0097470	ribbon synapse	CC	1	9	0.153451	0.541092	ENSSSCG00000029843
GO:0005771	multivesicular body	CC	2	38	0.153562	0.541092	ENSSSCG00000027928;ENSSSCG00000029304
GO:0005891	voltage-gated calcium channel complex	CC	2	38	0.153562	0.541092	ENSSSCG00000004701;ENSSSCG00000015543
GO:1904115	axon cytoplasm	CC	2	38	0.153562	0.541092	ENSSSCG00000009649;ENSSSCG00000021355
GO:0045177	apical part of cell	CC	8	286	0.156562	0.541092	ENSSSCG00000002450;ENSSSCG00000008118;ENSSSCG00000008745;ENSSSCG00000024018;ENSSSCG00000024058;ENSSSCG00000031423;ENSSSCG00000033190;ENSSSCG00000038275
[truncated: 3,024 more rows]
